# Supplementary material for: Global transcriptomic analysis identifies SERPINE1 as a prognostic biomarker associated with epithelial-to-mesenchymal transition in gastric cancer
Source: PeerJ. 2019 Jun 10;7:e7091. doi: 10.7717/peerj.7091 (PMC6563800; doi:10.7717/peerj.7091)
Supplement: Supplemental Information 1 [file peerj-07-7091-s001.xlsx]

## Sheet: Sheet1
ID	adj.P.Val	P.Value	t	B	logFC	Gene.symbol	Gene.title
210125_s_at	8.2e-83	1.5e-87	49.6723	187.802	3.12621	BANF1	barrier to autointegration factor 1
210023_s_at	9.04e-73	3.31e-77	41.0232	164.889	2.71193	PCGF1	polycomb group ring finger 1
200041_s_at	2.56e-72	1.87e-76	40.4484	163.208	2.15371	ATP6V1G2-DDX39B///SNORD84///DDX39B	ATP6V1G2-DDX39B readthrough (NMD candidate)///small nucleolar RNA, C/D box 84///DEAD-box helicase 39B
225294_s_at	2.56e-72	1.78e-76	40.4651	163.258	2.9879	TRAPPC1	trafficking protein particle complex 1
240601_at	1.05e-70	9.62e-75	-39.1671	159.382	-3.20628
231875_at	3.72e-66	4.08e-70	-35.871	148.996	-3.34482	KIF21A	kinesin family member 21A
221006_s_at	7.59e-65	1.23e-68	34.8674	145.668	2.76447	SNX27	sorting nexin family member 27
229982_at	7.59e-65	1.25e-68	34.8626	145.651	3.59462	QSER1	glutamine and serine rich 1
228582_x_at	3.91e-62	7.16e-66	33.0507	139.43	3.53088	MALAT1	metastasis associated lung adenocarcinoma transcript 1 (non-protein coding)
213956_at	1.14e-60	2.7e-64	32.0488	135.866	2.37143	CEP350	centrosomal protein 350
212291_at	1.71e-60	4.39e-64	31.9166	135.389	2.73228	HIPK1	homeodomain interacting protein kinase 1
208611_s_at	9.81e-59	2.87e-62	30.7956	131.28	3.12595	SPTAN1	spectrin alpha, non-erythrocytic 1
200707_at	8.14e-58	2.53e-61	30.2238	129.137	3.28818	PRKCSH	protein kinase C substrate 80K-H
227404_s_at	9.78e-57	3.4e-60	29.5522	126.58	5.90164	EGR1	early growth response 1
208973_at	9.95e-57	3.64e-60	29.5347	126.512	2.22379	ERI3	ERI1 exoribonuclease family member 3
208297_s_at	1.1e-56	4.21e-60	-29.4972	126.368	-2.01286	EVI5	ecotropic viral integration site 5
1555730_a_at	1.99e-55	8.39e-59	28.7383	123.42	2.06713	CFL1	cofilin 1
221830_at	1.1e-54	4.81e-58	28.302	121.698	2.89917	RAP2A	RAP2A, member of RAS oncogene family
200613_at	3.95e-54	1.88e-57	27.9649	120.353	1.91991	AP2M1	adaptor related protein complex 2 mu 1 subunit
206491_s_at	7.69e-54	3.8e-57	27.7918	119.659	1.87872	NAPA	NSF attachment protein alpha
202987_at	4.97e-53	2.55e-56	-27.3277	117.779	-1.98423	TRAF3IP2	TRAF3 interacting protein 2
218748_s_at	6.86e-53	3.64e-56	27.2414	117.427	2.7882	EXOC5	exocyst complex component 5
200709_at	1.73e-52	9.82e-56	27.002	116.446	2.05284	LOC101929368///FKBP1A	uncharacterized LOC101929368///FK506 binding protein 1A
201251_at	2.63e-52	1.54e-55	26.8937	116.001	3.83284	PKM	pyruvate kinase, muscle
240390_at	3.35e-52	2.02e-55	-26.8287	115.732	-3.0571	GALNT5	polypeptide N-acetylgalactosaminyltransferase 5
204506_at	9.82e-52	6.28e-55	-26.5583	114.612	-1.90952	PPP3R1	protein phosphatase 3 regulatory subunit B, alpha
217878_s_at	2.57e-51	1.69e-54	-26.3238	113.634	-2.05668	CDC27	cell division cycle 27
218841_at	2.57e-51	1.74e-54	-26.317	113.605	-1.75049	ASB8	ankyrin repeat and SOCS box containing 8
229905_at	8.17e-51	5.68e-54	26.0385	112.435	2.54691	RAP1GDS1	Rap1 GTPase-GDP dissociation stimulator 1
215252_at	1.62e-50	1.16e-53	25.8725	111.733	2.75935	DNAJC7	DnaJ heat shock protein family (Hsp40) member C7
1556743_at	5.25e-50	3.94e-53	-25.5871	110.52	-1.75626	ZNF654	zinc finger protein 654
235577_at	5.25e-50	3.92e-53	25.588	110.524	2.23743	ZNF652	zinc finger protein 652
216915_s_at	6.78e-50	5.2e-53	25.5226	110.244	3.03962	PTPN12	protein tyrosine phosphatase, non-receptor type 12
234989_at	9.15e-50	7.2e-53	25.4477	109.923	2.91126	MIR612///NEAT1	microRNA 612///nuclear paraspeckle assembly transcript 1 (non-protein coding)
1554574_a_at	9.63e-50	7.75e-53	25.4307	109.85	2.64377	CYB5R3	cytochrome b5 reductase 3
210649_s_at	1.74e-49	1.43e-52	25.2892	109.243	2.49018	ARID1A	AT-rich interaction domain 1A
242835_s_at	1.85e-49	1.56e-52	-25.2695	109.158	-1.8921	LOC728730	uncharacterized LOC728730
1553718_at	2.06e-49	1.77e-52	25.2399	109.03	1.52569	ZNF548	zinc finger protein 548
229457_at	5.03e-49	4.42e-52	-25.0311	108.128	-2.06972	ANKHD1	ankyrin repeat and KH domain containing 1
235412_at	5.53e-49	4.96e-52	25.0047	108.014	3.42757	ARHGEF7	Rho guanine nucleotide exchange factor 7
1554530_at	1.22e-48	1.11e-51	-24.8204	107.212	-1.99546	VSTM2A	V-set and transmembrane domain containing 2A
213048_s_at	1.54e-48	1.44e-51	24.762	106.958	2.74715	SET	SET nuclear proto-oncogene
224863_at	5.44e-48	5.48e-51	-24.4603	105.635	-2.2582	GNAQ	G protein subunit alpha q
201367_s_at	9.56e-48	9.8e-51	24.3297	105.059	3.07212	ZFP36L2	ZFP36 ring finger protein like 2
1569003_at	1.2e-47	1.26e-50	24.274	104.813	3.28848	VMP1	vacuole membrane protein 1
242665_at	4.19e-47	4.45e-50	23.9919	103.56	2.9466	FMNL2	formin like 2
215743_at	7.42e-47	8.28e-50	-23.854	102.945	-2.42074	NMT2	N-myristoyltransferase 2
200649_at	9.78e-47	1.11e-49	23.7894	102.655	2.02297	NUCB1	nucleobindin 1
1554747_a_at	1.51e-46	1.74e-49	23.6895	102.207	2.28942	2019-09-02	septin 2
201378_s_at	3.62e-46	4.37e-49	23.4875	101.296	1.99742	UBAP2L	ubiquitin associated protein 2 like
225827_at	3.75e-46	4.59e-49	23.4764	101.247	2.16303	AGO2	argonaute 2, RISC catalytic component
1561146_at	4.36e-46	5.43e-49	-23.4399	101.082	-1.34658	VPS35	VPS35 retromer complex component
209852_x_at	4.53e-46	5.72e-49	23.4285	101.03	2.08961	PSME3	proteasome activator subunit 3
1556927_at	7.31e-46	9.36e-49	-23.3206	100.541	-1.77775	KCNK10	potassium two pore domain channel subfamily K member 10
232330_at	1.77e-45	2.3e-48	-23.1247	99.6493	-2.26423	COA1	cytochrome c oxidase assembly factor 1 homolog
209675_s_at	2.74e-45	3.66e-48	23.0242	99.1899	1.65465	HNRNPUL1	heterogeneous nuclear ribonucleoprotein U like 1
239650_at	6.08e-45	8.22e-48	-22.849	98.3861	-2.12948	NCKAP5	NCK associated protein 5
215409_at	6.32e-45	8.67e-48	-22.8376	98.3338	-2.37913	LPCAT4	lysophosphatidylcholine acyltransferase 4
1558733_at	1.31e-44	1.82e-47	22.6784	97.6002	2.26821	ZBTB38	zinc finger and BTB domain containing 38
1567628_at	2.02e-44	2.84e-47	22.5823	97.1557	3.78125	CD74	CD74 molecule
218075_at	4.42e-44	6.31e-47	22.412	96.3651	1.11556	AAAS	aladin WD repeat nucleoporin
230566_at	1.23e-43	1.81e-46	22.1883	95.3214	1.56843	MORC2-AS1	MORC2 antisense RNA 1
207622_s_at	1.68e-43	2.5e-46	22.1199	95.0009	1.76877	ABCF2	ATP binding cassette subfamily F member 2
230200_at	2.31e-43	3.47e-46	-22.0502	94.6742	-1.99432	NSUN6	NOP2/Sun RNA methyltransferase family member 6
1558747_at	2.33e-43	3.54e-46	22.0459	94.6535	2.84547	SMCHD1	structural maintenance of chromosomes flexible hinge domain containing 1
223585_x_at	2.68e-43	4.12e-46	22.0141	94.5042	1.9244	KBTBD2	kelch repeat and BTB domain containing 2
214007_s_at	2.9e-43	4.51e-46	21.9948	94.4134	2.70468	TWF1	twinfilin actin binding protein 1
225465_at	4.29e-43	6.82e-46	-21.9076	94.0027	-2.16966	MAGI1	membrane associated guanylate kinase, WW and PDZ domain containing 1
215658_at	5.54e-43	8.92e-46	-21.8512	93.7365	-2.51572	LINC00675	long intergenic non-protein coding RNA 675
217951_s_at	5.88e-43	9.57e-46	-21.8365	93.6671	-1.74786	PHF3	PHD finger protein 3
211136_s_at	6.01e-43	9.9e-46	21.8293	93.6333	1.92398	CLPTM1	CLPTM1, transmembrane protein
1563321_s_at	6.18e-43	1.03e-45	21.8212	93.5949	2.21735	MLLT10	myeloid/lymphoid or mixed-lineage leukemia; translocated to, 10
206917_at	7.69e-43	1.33e-45	21.7666	93.3366	2.40289	GNA13	G protein subunit alpha 13
227969_at	1.04e-42	1.87e-45	-21.6961	93.0027	-2.76213	PCBP1-AS1	PCBP1 antisense RNA 1
215050_x_at	1.09e-42	2e-45	21.6819	92.9355	1.22107	MAPKAPK2	mitogen-activated protein kinase-activated protein kinase 2
216595_at	1.14e-42	2.11e-45	-21.6709	92.8833	-1.22734	FAM186A	family with sequence similarity 186 member A
229916_at	1.9e-42	3.62e-45	-21.5579	92.3458	-1.50906	ENPP6	ectonucleotide pyrophosphatase/phosphodiesterase 6
1559397_s_at	2.95e-42	5.71e-45	21.4629	91.8935	1.7871	PRR14	proline rich 14
202734_at	2.97e-42	5.81e-45	21.4596	91.8774	2.04198	TRIP10	thyroid hormone receptor interactor 10
200787_s_at	3.28e-42	6.48e-45	21.4368	91.7689	2.53128	PEA15	phosphoprotein enriched in astrocytes 15
236431_at	3.38e-42	6.74e-45	-21.4285	91.7291	-1.77082	U2SURP	U2 snRNP associated SURP domain containing
232483_at	4.1e-42	8.32e-45	-21.3847	91.5199	-1.74156	MED17	mediator complex subunit 17
203294_s_at	5.98e-42	1.25e-44	21.3008	91.1182	2.40145	LMAN1	lectin, mannose binding 1
203085_s_at	6.43e-42	1.35e-44	21.2841	91.0381	3.29355	TGFB1	transforming growth factor beta 1
227621_at	6.85e-42	1.47e-44	21.2673	90.9574	2.1802	WTAP	Wilms tumor 1 associated protein
1558306_at	6.98e-42	1.51e-44	21.2618	90.931	1.47992	THADA	THADA, armadillo repeat containing
1559276_at	9.59e-42	2.09e-44	-21.1943	90.6071	-2.45616	PCAT18	prostate cancer associated transcript 18 (non-protein coding)
240230_s_at	1.23e-41	2.69e-44	-21.1417	90.3542	-1.46026	AGAP9	ArfGAP with GTPase domain, ankyrin repeat and PH domain 9
201020_at	1.42e-41	3.14e-44	-21.1103	90.2027	-1.78344	YWHAH	tyrosine 3-monooxygenase/tryptophan 5-monooxygenase activation protein eta
204055_s_at	1.76e-41	3.95e-44	-21.0628	89.9738	-2.52322	CTAGE5	CTAGE family member 5, ER export factor
226880_at	3.03e-41	6.87e-44	20.9489	89.4237	2.26858	NUCKS1	nuclear casein kinase and cyclin dependent kinase substrate 1
1554241_at	3.91e-41	8.93e-44	20.8951	89.1631	2.26001	COCH	cochlin
227511_at	4.32e-41	9.95e-44	20.873	89.0563	1.97002	SAMD4B	sterile alpha motif domain containing 4B
215231_at	4.52e-41	1.05e-43	-20.8618	89.002	-1.47814	PRKAG2	protein kinase AMP-activated non-catalytic subunit gamma 2
1557275_a_at	6.16e-41	1.44e-43	-20.7971	88.6876	-2.55623	TLCD2	TLC domain containing 2
204021_s_at	7.72e-41	1.84e-43	-20.7476	88.4473	-1.79522	PURA	purine rich element binding protein A
235057_at	1.01e-40	2.42e-43	-20.6915	88.1741	-2.39155	ITCH	itchy E3 ubiquitin protein ligase
1555817_s_at	1.01e-40	2.44e-43	-20.6898	88.1658	-1.18335	THSD4	thrombospondin type 1 domain containing 4
232030_at	1.51e-40	3.69e-43	-20.6056	87.7554	-1.82788	EPG5	ectopic P-granules autophagy protein 5 homolog
210317_s_at	2.06e-40	5.04e-43	20.5418	87.4436	2.84063	YWHAE	tyrosine 3-monooxygenase/tryptophan 5-monooxygenase activation protein epsilon
221759_at	2.72e-40	6.81e-43	20.481	87.1461	1.65148	G6PC3	glucose-6-phosphatase catalytic subunit 3
215910_s_at	2.85e-40	7.2e-43	20.4696	87.0904	1.99953	FNDC3A	fibronectin type III domain containing 3A
243692_at	3.19e-40	8.12e-43	-20.4453	86.9711	-2.21818	GATA4	GATA binding protein 4
200928_s_at	4.47e-40	1.14e-42	-20.3758	86.6303	-1.36179	RAB14	RAB14, member RAS oncogene family
212103_at	4.6e-40	1.19e-42	-20.3683	86.5935	-1.66718	KPNA6	karyopherin subunit alpha 6
205773_at	5.76e-40	1.5e-42	-20.3216	86.3637	-1.66397	CPEB3	cytoplasmic polyadenylation element binding protein 3
232529_at	6.3e-40	1.65e-42	-20.3021	86.2681	-2.53316	SP3	Sp3 transcription factor
1570445_a_at	8.44e-40	2.25e-42	-20.2388	85.9559	-2.49825	LOC643201	centrosomal protein 192kDa pseudogene
229273_at	8.66e-40	2.33e-42	-20.2322	85.9237	-2.27303	SALL1	spalt like transcription factor 1
1559954_s_at	9.07e-40	2.45e-42	20.2217	85.8718	2.26243	DDX42	DEAD-box helicase 42
228670_at	1.05e-39	2.89e-42	-20.1885	85.7083	-1.76123	TEP1	telomerase associated protein 1
222336_at	1.76e-39	4.87e-42	-20.0839	85.1914	-1.89985	SMIM14	small integral membrane protein 14
213619_at	2.16e-39	6.02e-42	20.0414	84.9807	1.83695	HNRNPH1	heterogeneous nuclear ribonucleoprotein H1 (H)
205457_at	2.27e-39	6.36e-42	-20.0303	84.9256	-1.43431	C6orf106	chromosome 6 open reading frame 106
1556122_at	2.64e-39	7.49e-42	-19.9975	84.7631	-1.34061	RAB11B-AS1	RAB11B antisense RNA 1
1559022_at	4.02e-39	1.15e-41	-19.9124	84.3404	-1.53082	EFCAB14	EF-hand calcium binding domain 14
225820_at	5.15e-39	1.49e-41	-19.8601	84.0805	-2.22198	JADE1	jade family PHD finger 1
230462_at	5.45e-39	1.59e-41	-19.8474	84.0174	-2.12703	NUMB	NUMB, endocytic adaptor protein
230669_at	8.13e-39	2.39e-41	19.7654	83.6084	1.88783	RASA2	RAS p21 protein activator 2
200918_s_at	8.91e-39	2.64e-41	19.7458	83.5108	1.37454	SRPRA	SRP receptor alpha subunit
215219_at	9.58e-39	2.86e-41	-19.7302	83.4326	-1.55734	DOPEY2	dopey family member 2
228250_at	1e-38	3.01e-41	19.7196	83.3797	1.8678	FNIP1	folliculin interacting protein 1
233396_s_at	1.05e-38	3.17e-41	-19.7098	83.3307	-1.63732	PET117///KAT14	PET117 homolog///lysine acetyltransferase 14
214196_s_at	1.23e-38	3.77e-41	19.675	83.1569	1.61839	TPP1	tripeptidyl peptidase 1
1558515_at	1.23e-38	3.76e-41	19.6753	83.1584	1.88616	FTX	FTX transcript, XIST regulator (non-protein coding)
201469_s_at	1.25e-38	3.83e-41	19.672	83.1417	1.65846	SHC1	SHC adaptor protein 1
220388_at	1.38e-38	4.25e-41	-19.6511	83.0373	-1.23325	FER1L4	fer-1 like family member 4, pseudogene
209204_at	1.56e-38	4.86e-41	-19.6246	82.9046	-2.61884	LMO4	LIM domain only 4
240200_at	1.89e-38	5.91e-41	-19.5857	82.7098	-3.73851	SULT1C2	sulfotransferase family 1C member 2
200695_at	1.9e-38	5.96e-41	19.5839	82.7009	1.45335	PPP2R1A	protein phosphatase 2 scaffold subunit Aalpha
203676_at	4.62e-38	1.47e-40	19.4054	81.8038	2.0991	GNS	glucosamine (N-acetyl)-6-sulfatase
209916_at	5.09e-38	1.63e-40	-19.3852	81.7022	-2.10465	DHTKD1	dehydrogenase E1 and transketolase domain containing 1
238706_at	5.75e-38	1.85e-40	19.3599	81.5748	2.39288	PAPD4	poly(A) RNA polymerase D4, non-canonical
202024_at	7.98e-38	2.58e-40	19.2944	81.2441	1.24998	ASNA1	arsA arsenite transporter, ATP-binding, homolog 1 (bacterial)
202118_s_at	8.34e-38	2.72e-40	19.2845	81.1943	2.38963	CPNE3	copine 3
1552884_at	1.44e-37	4.76e-40	-19.1744	80.6371	-2.71879	NKX6-3	NK6 homeobox 3
1568598_at	1.49e-37	5e-40	-19.1647	80.588	-2.4847	KAZALD1	Kazal type serine peptidase inhibitor domain 1
222508_s_at	1.49e-37	4.98e-40	-19.1653	80.5911	-1.74294	ARGLU1	arginine and glutamate rich 1
212016_s_at	1.53e-37	5.15e-40	19.1589	80.5586	1.67064	MIR4745///PTBP1	microRNA 4745///polypyrimidine tract binding protein 1
1555337_a_at	2.17e-37	7.35e-40	19.089	80.204	1.67583	ZNF317	zinc finger protein 317
212249_at	2.29e-37	7.8e-40	19.0774	80.1453	2.61397	PIK3R1	phosphoinositide-3-kinase regulatory subunit 1
203388_at	2.33e-37	7.96e-40	19.0735	80.1251	1.4666	ARRB2	arrestin beta 2
1562236_at	2.42e-37	8.39e-40	-19.063	80.0721	-0.912115	KAT6B	lysine acetyltransferase 6B
221762_s_at	3.14e-37	1.1e-39	19.0096	79.8007	1.36051	PCIF1	PDX1 C-terminal inhibiting factor 1
239636_at	3.32e-37	1.17e-39	-18.9977	79.7399	-1.1531	MCF2L	MCF.2 cell line derived transforming sequence like
200796_s_at	3.34e-37	1.18e-39	18.9958	79.7302	3.28201	MCL1	BCL2 family apoptosis regulator
203239_s_at	4.05e-37	1.45e-39	18.9561	79.5284	1.78156	CNOT3	CCR4-NOT transcription complex subunit 3
201040_at	4.2e-37	1.52e-39	18.9469	79.4814	1.65199	GNAI2	G protein subunit alpha i2
222641_s_at	4.29e-37	1.56e-39	18.9419	79.4557	1.66557	FAM222B	family with sequence similarity 222 member B
236327_at	4.66e-37	1.71e-39	18.9245	79.367	2.22654	CEPT1	choline/ethanolamine phosphotransferase 1
221021_s_at	4.8e-37	1.76e-39	-18.9181	79.3343	-1.53252	CTNNBL1	catenin beta like 1
201050_at	5.64e-37	2.09e-39	18.8845	79.1632	2.1394	PLD3	phospholipase D family member 3
236372_at	6.21e-37	2.32e-39	18.8649	79.0632	1.25897	PANX1	pannexin 1
230609_at	6.32e-37	2.37e-39	18.8605	79.0409	3.53813	CLINT1	clathrin interactor 1
242472_x_at	6.61e-37	2.49e-39	-18.8506	78.9903	-0.921259	FNBP4	formin binding protein 4
223844_at	6.67e-37	2.52e-39	-18.8481	78.9772	-1.69218	ADAMTS13	ADAM metallopeptidase with thrombospondin type 1 motif 13
231291_at	7.67e-37	2.93e-39	-18.819	78.8287	-1.71135	GIPR	gastric inhibitory polypeptide receptor
238621_at	8.11e-37	3.12e-39	-18.8072	78.7683	-1.64735	FMN1	formin 1
AFFX-HSAC07/X00351_5_at	8.36e-37	3.23e-39	18.8003	78.7331	1.78404	ACTB	actin beta
216971_s_at	9.78e-37	3.79e-39	18.769	78.573	2.7205	PLEC	plectin
1562511_at	1.16e-36	4.53e-39	-18.7345	78.3961	-1.11382	LYST	lysosomal trafficking regulator
1555229_a_at	1.32e-36	5.16e-39	18.7091	78.2663	4.39848	C1S	complement component 1, s subcomponent
218555_at	1.56e-36	6.13e-39	18.6756	78.0946	1.44226	ANAPC2	anaphase promoting complex subunit 2
238174_at	1.73e-36	6.83e-39	-18.6546	77.9869	-1.4213	FBXL17	F-box and leucine rich repeat protein 17
216058_s_at	1.81e-36	7.19e-39	-18.6449	77.9369	-2.23406	CYP2C19	cytochrome P450 family 2 subfamily C member 19
207983_s_at	1.84e-36	7.34e-39	18.6407	77.9155	1.59639	STAG2	stromal antigen 2
235434_at	3.2e-36	1.29e-38	-18.5315	77.354	-1.80832	CCDC134	coiled-coil domain containing 134
238573_at	3.29e-36	1.34e-38	-18.5249	77.3199	-1.62214	OTUD7B	OTU deubiquitinase 7B
200964_at	3.49e-36	1.43e-38	18.5116	77.2515	1.51812	UBA1	ubiquitin like modifier activating enzyme 1
209254_at	3.59e-36	1.48e-38	18.5053	77.2189	1.43889	KLHDC10	kelch domain containing 10
235795_at	3.61e-36	1.5e-38	-18.5028	77.206	-3.34292	PAX6	paired box 6
1554314_at	3.76e-36	1.57e-38	-18.4933	77.1572	-2.3603	C6orf141	chromosome 6 open reading frame 141
233527_at	3.98e-36	1.67e-38	-18.4814	77.0961	-2.05476	LOC101929340	uncharacterized LOC101929340
221696_s_at	5.2e-36	2.21e-38	-18.4282	76.8214	-2.73511	STYK1	serine/threonine/tyrosine kinase 1
215936_s_at	5.38e-36	2.29e-38	18.4207	76.7828	1.81331	KIAA1033	KIAA1033
212332_at	5.63e-36	2.41e-38	18.4113	76.7343	1.58434	RBL2	RB transcriptional corepressor like 2
1556551_s_at	5.73e-36	2.46e-38	18.407	76.7118	1.83167	SLC39A6	solute carrier family 39 member 6
220524_at	6.37e-36	2.75e-38	-18.3857	76.6021	-1.74049	EPB41L4B	erythrocyte membrane protein band 4.1 like 4B
213548_s_at	6.5e-36	2.83e-38	18.3803	76.5741	2.2185	CDV3	CDV3 homolog
233063_s_at	7.06e-36	3.08e-38	-18.3637	76.4884	-2.2077	GMDS-AS1	GMDS antisense RNA 1 (head to head)
224974_at	7.52e-36	3.3e-38	-18.3507	76.4213	-1.60099	SUDS3	SDS3 homolog, SIN3A corepressor complex component
226023_at	7.94e-36	3.53e-38	-18.3377	76.3541	-1.33937	MAP2K7	mitogen-activated protein kinase kinase 7
239478_x_at	7.94e-36	3.53e-38	-18.3377	76.354	-1.0235	GPATCH2L	G-patch domain containing 2 like
213977_s_at	8.05e-36	3.59e-38	18.3344	76.337	1.42646	CIZ1	CDKN1A interacting zinc finger protein 1
230786_at	8.42e-36	3.77e-38	-18.3249	76.2875	-1.42079	ZCCHC8	zinc finger CCHC-type containing 8
229115_at	8.79e-36	3.95e-38	18.3159	76.241	1.62622	DYNC1H1	dynein cytoplasmic 1 heavy chain 1
216834_at	8.8e-36	3.98e-38	18.3148	76.2353	3.58656	RGS1	regulator of G-protein signaling 1
220391_at	8.87e-36	4.02e-38	-18.3127	76.2244	-1.26286	ZBTB3	zinc finger and BTB domain containing 3
200722_s_at	8.88e-36	4.04e-38	18.3116	76.2187	1.52814	CAPRIN1	cell cycle associated protein 1
211973_at	1.14e-35	5.22e-38	18.2627	75.9654	1.86357	NUDT3	nudix hydrolase 3
215451_s_at	1.32e-35	6.05e-38	18.2343	75.8182	1.20099	AFF1	AF4/FMR2 family member 1
236291_at	1.55e-35	7.2e-38	-18.2008	75.6445	-1.44276	RDH5	retinol dehydrogenase 5
209044_x_at	1.57e-35	7.33e-38	18.1975	75.6275	1.79122	SF3B4	splicing factor 3b subunit 4
235378_at	1.6e-35	7.5e-38	-18.193	75.6039	-1.07504	FAM161B	family with sequence similarity 161 member B
215236_s_at	1.71e-35	8.05e-38	18.1795	75.5341	1.82676	PICALM	phosphatidylinositol binding clathrin assembly protein
1569269_s_at	1.78e-35	8.38e-38	18.1717	75.4936	1.50866	SRGAP1	SLIT-ROBO Rho GTPase activating protein 1
200808_s_at	1.84e-35	8.73e-38	18.164	75.4538	2.84076	ZYX	zyxin
1557359_at	1.93e-35	9.23e-38	-18.1534	75.3985	-1.75396	LINC01268	long intergenic non-protein coding RNA 1268
219965_s_at	2.03e-35	9.77e-38	-18.1425	75.3418	-1.73556	MAGIX	MAGI family member, X-linked
200861_at	2.16e-35	1.05e-37	18.1294	75.2737	0.998072	CNOT1	CCR4-NOT transcription complex subunit 1
1556088_at	2.19e-35	1.07e-37	-18.1256	75.2542	-1.80613	RPAIN	RPA interacting protein
200990_at	2.24e-35	1.09e-37	18.1209	75.2298	1.77336	TRIM28	tripartite motif containing 28
239077_at	2.66e-35	1.32e-37	18.0846	75.0407	1.48936	CSGALNACT2	chondroitin sulfate N-acetylgalactosaminyltransferase 2
225103_at	3.03e-35	1.52e-37	18.0581	74.9029	1.50307	MRPL38	mitochondrial ribosomal protein L38
1559590_at	3.45e-35	1.74e-37	-18.0319	74.7662	-1.89977	CHDH	choline dehydrogenase
208710_s_at	3.5e-35	1.77e-37	-18.0287	74.7495	-1.3783	AP3D1	adaptor related protein complex 3 delta 1 subunit
1554159_a_at	3.51e-35	1.78e-37	18.0274	74.7426	1.78231	ZMYND11	zinc finger MYND-type containing 11
1557548_at	3.65e-35	1.86e-37	-18.0193	74.7006	-1.96351	PRR26	proline rich 26
228711_at	3.8e-35	1.95e-37	-18.0105	74.655	-1.72229	LOC101929740///ZNF37A	zinc finger protein 761-like///zinc finger protein 37A
223324_s_at	3.86e-35	1.98e-37	-18.0073	74.6381	-1.43697	TRPM7	transient receptor potential cation channel subfamily M member 7
210505_at	4.25e-35	2.19e-37	-17.988	74.5372	-3.21196	ADH7	alcohol dehydrogenase 7 (class IV), mu or sigma polypeptide
1555812_a_at	4.28e-35	2.21e-37	17.9862	74.5279	2.5757	ARHGDIB	Rho GDP dissociation inhibitor beta
213229_at	4.72e-35	2.46e-37	17.9658	74.4216	1.65261	DICER1	dicer 1, ribonuclease III
230885_at	4.85e-35	2.55e-37	-17.9594	74.388	-1.83244	LOC101930112///SPG7	uncharacterized LOC101930112///SPG7, paraplegin matrix AAA peptidase subunit
201072_s_at	5.87e-35	3.12e-37	-17.9206	74.1853	-1.64945	SMARCC1	SWI/SNF related, matrix associated, actin dependent regulator of chromatin subfamily c member 1
219730_at	6.33e-35	3.39e-37	-17.9049	74.1035	-2.10841	LOC100996782///MED18	mediator of RNA polymerase II transcription subunit 18-like///mediator complex subunit 18
1554769_at	6.49e-35	3.49e-37	-17.8996	74.0756	-1.87136	ZNF785	zinc finger protein 785
200879_s_at	6.77e-35	3.66e-37	17.8906	74.0289	2.25042	EPAS1	endothelial PAS domain protein 1
227116_at	8.25e-35	4.53e-37	-17.8499	73.8161	-1.35461	MON1B	MON1 homolog B, secretory trafficking associated
242649_x_at	1.05e-34	5.86e-37	-17.8009	73.5595	-3.41064	HMGN2P46	high mobility group nucleosomal binding domain 2 pseudogene 46
244490_at	1.05e-34	5.83e-37	17.8018	73.5639	1.74429	LINC01355	long intergenic non-protein coding RNA 1355
244287_at	1.15e-34	6.4e-37	-17.7841	73.471	-1.23138	SREK1	splicing regulatory glutamic acid and lysine rich protein 1
212979_s_at	1.17e-34	6.55e-37	-17.7799	73.4492	-1.95575	LOC100294033///TCAF1	protein FAM115A-like///TRPM8 channel associated factor 1
201702_s_at	1.17e-34	6.59e-37	17.7785	73.4419	1.64364	PPP1R10	protein phosphatase 1 regulatory subunit 10
228320_x_at	1.33e-34	7.51e-37	-17.7538	73.3121	-2.61218	BICDL1	BICD family like cargo adaptor 1
238420_at	1.43e-34	8.06e-37	17.7404	73.2419	1.55074	TAOK1	TAO kinase 1
243166_at	1.55e-34	8.84e-37	-17.7229	73.1499	-1.37306	SLC30A5	solute carrier family 30 member 5
1558236_at	1.65e-34	9.41e-37	-17.711	73.0876	-2.19645	DR1	down-regulator of transcription 1
209712_at	1.71e-34	9.79e-37	-17.7037	73.0491	-2.18114	SLC35D1	solute carrier family 35 member D1
202017_at	1.78e-34	1.02e-36	17.6951	73.004	2.81337	EPHX1	epoxide hydrolase 1
214861_at	1.92e-34	1.11e-36	-17.6804	72.9268	-1.29586	KDM4C	lysine demethylase 4C
216033_s_at	1.98e-34	1.14e-36	17.6744	72.8952	2.43555	FYN	FYN proto-oncogene, Src family tyrosine kinase
226967_at	1.99e-34	1.15e-36	17.6728	72.8869	1.18999	FIZ1	FLT3 interacting zinc finger 1
219872_at	2.39e-34	1.39e-36	17.6367	72.6971	3.17902	FAM198B	family with sequence similarity 198 member B
239671_at	2.48e-34	1.45e-36	-17.6294	72.6586	-2.43312	SYT16	synaptotagmin 16
203870_at	2.48e-34	1.45e-36	-17.6288	72.6558	-1.54705	USP46	ubiquitin specific peptidase 46
241804_at	2.52e-34	1.48e-36	-17.6248	72.6345	-1.31155	LOC102724275	uncharacterized LOC102724275
236278_at	2.66e-34	1.57e-36	-17.6141	72.5783	-2.36067	HIST1H3E	histone cluster 1, H3e
40850_at	2.66e-34	1.58e-36	17.6132	72.5734	1.67302	FKBP8	FK506 binding protein 8
1552611_a_at	2.71e-34	1.61e-36	-17.6097	72.5551	-1.60413	JAK1	Janus kinase 1
224929_at	2.73e-34	1.63e-36	17.6071	72.5415	2.12797	TMEM173	transmembrane protein 173
203330_s_at	2.75e-34	1.65e-36	17.6047	72.5285	1.124	STX5	syntaxin 5
222294_s_at	2.77e-34	1.67e-36	-17.603	72.5199	-3.08762	RAB27A	RAB27A, member RAS oncogene family
232940_s_at	2.89e-34	1.74e-36	-17.5944	72.4746	-1.92918	KMT2C	lysine methyltransferase 2C
217775_s_at	3.08e-34	1.86e-36	-17.5818	72.408	-1.78799	RDH11	retinol dehydrogenase 11 (all-trans/9-cis/11-cis)
231999_at	3.22e-34	1.95e-36	-17.5728	72.3609	-1.21313	ANKRD11	ankyrin repeat domain 11
203547_at	3.23e-34	1.97e-36	17.5714	72.3532	1.95098	CD4	CD4 molecule
226400_at	3.63e-34	2.23e-36	17.5482	72.231	1.65337	CDC42	cell division cycle 42
229648_at	3.82e-34	2.35e-36	-17.5377	72.1759	-2.86436	ARHGAP32	Rho GTPase activating protein 32
200835_s_at	3.85e-34	2.38e-36	-17.5357	72.1654	-1.54346	MAP4	microtubule associated protein 4
240735_at	5.04e-34	3.12e-36	-17.4845	71.8949	-1.15347	CDC42BPA	CDC42 binding protein kinase alpha
91952_at	5.48e-34	3.4e-36	17.4681	71.8087	1.28742	DCAF15	DDB1 and CUL4 associated factor 15
217613_at	6.62e-34	4.13e-36	-17.4319	71.6173	-1.62122	TMEM144	transmembrane protein 144
206725_x_at	6.96e-34	4.35e-36	17.4219	71.5643	1.21625	BMP1	bone morphogenetic protein 1
235722_at	7.49e-34	4.7e-36	-17.4075	71.4883	-2.36997	SYNJ2BP-COX16///SYNJ2BP	SYNJ2BP-COX16 readthrough///synaptojanin 2 binding protein
219905_at	8.89e-34	5.61e-36	-17.3741	71.3115	-1.23823	ERMAP	erythroblast membrane associated protein (Scianna blood group)
223720_at	9.31e-34	5.89e-36	-17.365	71.2634	-2.26535	SPINK7	serine peptidase inhibitor, Kazal type 7 (putative)
222527_s_at	9.8e-34	6.22e-36	17.3548	71.2096	1.09465	RBM22	RNA binding motif protein 22
224563_at	9.81e-34	6.24e-36	-17.3541	71.2057	-1.50327	WASF2	WAS protein family member 2
220724_at	1.23e-33	7.88e-36	-17.3103	70.9735	-3.83417	CWH43	cell wall biogenesis 43 C-terminal homolog
203183_s_at	1.28e-33	8.26e-36	17.3015	70.9272	1.29256	SMARCD1	SWI/SNF related, matrix associated, actin dependent regulator of chromatin, subfamily d, member 1
218705_s_at	1.36e-33	8.83e-36	-17.2888	70.8599	-1.77395	SNX24	sorting nexin 24
209051_s_at	1.37e-33	8.88e-36	17.2879	70.8546	1.34464	RALGDS	ral guanine nucleotide dissociation stimulator
202310_s_at	1.47e-33	9.59e-36	17.2735	70.7787	4.30007	COL1A1	collagen type I alpha 1 chain
201289_at	1.53e-33	9.99e-36	17.2657	70.7373	4.34468	CYR61	cysteine rich angiogenic inducer 61
235937_at	1.78e-33	1.18e-35	-17.2348	70.5731	-2.40899	OCLN	occludin
211081_s_at	1.78e-33	1.18e-35	-17.2353	70.5755	-1.76882	MAP4K5	mitogen-activated protein kinase kinase kinase kinase 5
220363_s_at	1.82e-33	1.21e-35	17.2306	70.5505	1.42154	ELMO2	engulfment and cell motility 2
1554154_at	1.87e-33	1.24e-35	17.2247	70.5193	1.71284	GDAP2	ganglioside induced differentiation associated protein 2
211407_at	1.88e-33	1.25e-35	-17.2232	70.5114	-0.954043	NDUFB7	NADH:ubiquinone oxidoreductase subunit B7
225896_at	1.89e-33	1.26e-35	-17.2218	70.5043	-1.36465	MPRIP	myosin phosphatase Rho interacting protein
205430_at	1.98e-33	1.33e-35	-17.2116	70.4497	-1.93328	BMP5	bone morphogenetic protein 5
1558527_at	2.06e-33	1.39e-35	-17.204	70.4093	-1.36922	PAXIP1-AS2	PAXIP1 antisense RNA 2
221628_s_at	2.07e-33	1.4e-35	17.2027	70.4028	1.36419	GLYR1	glyoxylate reductase 1 homolog
207835_at	2.23e-33	1.52e-35	17.1874	70.3211	0.92121	FBLN1	fibulin 1
216527_at	2.45e-33	1.67e-35	-17.1695	70.2261	-1.73523	HCG18	HLA complex group 18 (non-protein coding)
227703_s_at	2.7e-33	1.85e-35	-17.1501	70.1228	-2.66641	SYTL4	synaptotagmin like 4
242552_x_at	2.99e-33	2.06e-35	17.1299	70.0153	0.919986	ZBED5	zinc finger BED-type containing 5
1556009_at	3.1e-33	2.14e-35	-17.123	69.9785	-2.17917	PEX13	peroxisomal biogenesis factor 13
244350_at	3.34e-33	2.31e-35	-17.1085	69.9017	-1.93209	MYO10	myosin X
1553551_s_at	3.79e-33	2.63e-35	17.0845	69.7738	0.822155	ND2	MTND2
234068_s_at	4.09e-33	2.86e-35	17.0691	69.6917	2.1104	AP2A1	adaptor related protein complex 2 alpha 1 subunit
242086_at	4.23e-33	2.97e-35	-17.062	69.6537	-2.52889	SPATA6	spermatogenesis associated 6
1554094_at	4.49e-33	3.16e-35	-17.0502	69.5908	-1.44795	ENTPD5	ectonucleoside triphosphate diphosphohydrolase 5
211611_s_at	4.5e-33	3.17e-35	-17.0496	69.5874	-1.25468	TNXB///ATF6B	tenascin XB///activating transcription factor 6 beta
225583_at	5.12e-33	3.65e-35	-17.0232	69.4469	-1.25803	UXS1	UDP-glucuronate decarboxylase 1
209575_at	5.25e-33	3.76e-35	-17.0181	69.4199	-1.67498	IL10RB	interleukin 10 receptor subunit beta
241669_x_at	5.44e-33	3.9e-35	-17.011	69.3817	-1.6605	PRKD2	protein kinase D2
225382_at	5.54e-33	3.98e-35	17.0071	69.3612	1.35805	ZNF275	zinc finger protein 275
1558641_at	5.96e-33	4.3e-35	16.9927	69.284	0.979113	SPATA24	spermatogenesis associated 24
239922_at	6.21e-33	4.5e-35	-16.9845	69.2403	-1.29676	CCDC142	coiled-coil domain containing 142
203363_s_at	6.84e-33	4.97e-35	16.966	69.1413	0.929469	ATG13	autophagy related 13
221220_s_at	7.73e-33	5.63e-35	16.9428	69.0176	2.14332	SCYL2	SCY1 like pseudokinase 2
230360_at	8.23e-33	6.02e-35	-16.9303	68.9507	-3.30251	GLDN	gliomedin
51146_at	8.23e-33	6.01e-35	-16.9306	68.9526	-1.43731	PIGV	phosphatidylinositol glycan anchor biosynthesis class V
211310_at	8.52e-33	6.28e-35	-16.9223	68.908	-0.742853	EZH1	enhancer of zeste 1 polycomb repressive complex 2 subunit
219426_at	1.1e-32	8.16e-35	16.8737	68.6479	1.50395	AGO3	argonaute 3, RISC catalytic component
201701_s_at	1.16e-32	8.64e-35	-16.863	68.5907	-1.72902	PGRMC2	progesterone receptor membrane component 2
215641_at	1.21e-32	9e-35	-16.8555	68.5503	-1.5742	SEC24D	SEC24 homolog D, COPII coat complex component
218294_s_at	1.22e-32	9.16e-35	-16.8522	68.5326	-1.99277	NUP50	nucleoporin 50
215399_s_at	1.25e-32	9.41e-35	16.8472	68.5061	1.06015	OS9	OS9, endoplasmic reticulum lectin
226720_at	1.28e-32	9.59e-35	-16.8436	68.4865	-1.69082	PWWP2A	PWWP domain containing 2A
224595_at	1.29e-32	9.72e-35	-16.8412	68.4738	-2.80984	SLC44A1	solute carrier family 44 member 1
212448_at	1.56e-32	1.18e-34	-16.8058	68.2842	-2.12269	NEDD4L	neural precursor cell expressed, developmentally down-regulated 4-like, E3 ubiquitin protein ligase
229399_at	1.6e-32	1.21e-34	-16.8002	68.2542	-3.22858	CCDC186	coiled-coil domain containing 186
45288_at	1.78e-32	1.36e-34	-16.7788	68.1392	-1.54007	ABHD6	abhydrolase domain containing 6
216092_s_at	1.79e-32	1.37e-34	-16.7774	68.1316	-2.48218	SLC7A8	solute carrier family 7 member 8
204032_at	1.88e-32	1.45e-34	-16.7672	68.0773	-2.09803	BCAR3	breast cancer anti-estrogen resistance 3
221103_s_at	2.14e-32	1.65e-34	-16.7434	67.9493	-2.02905	CFAP44	cilia and flagella associated protein 44
1552504_a_at	2.16e-32	1.67e-34	16.7407	67.9347	1.44311	BRSK1	BR serine/threonine kinase 1
240187_at	2.26e-32	1.75e-34	-16.7321	67.8885	-1.02546	PPP1R3C	protein phosphatase 1 regulatory subunit 3C
212113_at	2.3e-32	1.79e-34	-16.7278	67.8654	-1.68074	ATXN7L3B	ataxin 7 like 3B
201559_s_at	2.43e-32	1.89e-34	16.7175	67.8101	2.94372	CLIC4	chloride intracellular channel 4
201686_x_at	2.56e-32	2e-34	16.7073	67.7556	1.25764	API5	apoptosis inhibitor 5
207722_s_at	3.46e-32	2.72e-34	16.6505	67.4502	1.41247	BTBD2	BTB domain containing 2
203751_x_at	3.62e-32	2.85e-34	16.6416	67.402	2.33987	JUND	JunD proto-oncogene, AP-1 transcription factor subunit
230995_at	3.68e-32	2.91e-34	-16.638	67.383	-1.30035	CMBL	carboxymethylenebutenolidase homolog
209701_at	3.77e-32	2.98e-34	-16.6333	67.3577	-1.19547	ERAP1	endoplasmic reticulum aminopeptidase 1
228119_at	4.26e-32	3.38e-34	-16.61	67.2322	-1.50827	LRCH3	leucine rich repeats and calponin homology domain containing 3
229240_at	4.49e-32	3.58e-34	-16.5994	67.1749	-1.4165	ZDHHC21	zinc finger DHHC-type containing 21
200856_x_at	4.51e-32	3.61e-34	-16.5982	67.1684	-1.07396	NCOR1	nuclear receptor corepressor 1
1564315_at	4.76e-32	3.81e-34	-16.588	67.1138	-1.92538	C8orf49	chromosome 8 open reading frame 49
222272_x_at	4.98e-32	4e-34	-16.579	67.0651	-1.00867	SCIN	scinderin
244587_at	5.13e-32	4.13e-34	16.5732	67.0337	1.15266	ATF7	activating transcription factor 7
230559_x_at	5.35e-32	4.34e-34	-16.5641	66.9846	-2.43604	FGD4	FYVE, RhoGEF and PH domain containing 4
235163_at	5.36e-32	4.35e-34	16.5635	66.9813	1.05283	MOB3A	MOB kinase activator 3A
1559993_at	5.44e-32	4.43e-34	-16.5602	66.964	-1.79633	SFXN3	sideroflexin 3
217899_at	5.52e-32	4.51e-34	16.5571	66.9469	1.30832	TMEM214	transmembrane protein 214
222544_s_at	5.77e-32	4.71e-34	16.5488	66.9021	1.27189	WHSC1L1	Wolf-Hirschhorn syndrome candidate 1-like 1
1569352_at	5.98e-32	4.9e-34	-16.5416	66.8634	-1.58608	FNIP2	folliculin interacting protein 2
203729_at	6.48e-32	5.32e-34	16.5264	66.7817	2.77716	EMP3	epithelial membrane protein 3
211016_x_at	7.44e-32	6.14e-34	16.5	66.6392	2.00639	HSPA4	heat shock protein family A (Hsp70) member 4
235106_at	7.66e-32	6.33e-34	16.4943	66.6081	1.22891	MAML2	mastermind like transcriptional coactivator 2
226204_at	8.78e-32	7.3e-34	-16.468	66.4664	-1.05283	C22orf29///GNB1L	chromosome 22 open reading frame 29///G protein subunit beta 1 like
222093_s_at	8.8e-32	7.34e-34	16.4672	66.462	0.911454	INO80B	INO80 complex subunit B
213046_at	8.88e-32	7.43e-34	-16.4649	66.4498	-1.12251	PABPN1	poly(A) binding protein nuclear 1
231974_at	1.02e-31	8.56e-34	16.4387	66.3078	1.0055	KMT2D	lysine methyltransferase 2D
226075_at	1.02e-31	8.64e-34	16.437	66.2987	1.99742	SPSB1	splA/ryanodine receptor domain and SOCS box containing 1
236263_at	1.03e-31	8.7e-34	-16.4358	66.2925	-2.53541	SHH	sonic hedgehog
221233_s_at	1.06e-31	8.98e-34	-16.4299	66.2606	-0.677897	FAM135A	family with sequence similarity 135 member A
242903_at	1.12e-31	9.58e-34	16.418	66.1961	2.2363	IFNGR1	interferon gamma receptor 1
209764_at	1.13e-31	9.61e-34	-16.4174	66.1927	-1.6722	MGAT3	mannosyl (beta-1,4-)-glycoprotein beta-1,4-N-acetylglucosaminyltransferase
219868_s_at	1.15e-31	9.9e-34	16.412	66.1637	1.05358	ANKFY1	ankyrin repeat and FYVE domain containing 1
204166_at	1.18e-31	1.01e-33	16.4074	66.139	1.61547	SBNO2	strawberry notch homolog 2
217626_at	1.36e-31	1.17e-33	-16.3805	65.9932	-2.57578	AKR1C1	aldo-keto reductase family 1 member C1
1556057_s_at	1.5e-31	1.31e-33	-16.3601	65.8831	-2.70199	NEUROD1	neuronal differentiation 1
209156_s_at	1.5e-31	1.31e-33	16.3601	65.8826	4.11513	COL6A2	collagen type VI alpha 2 chain
214843_s_at	1.56e-31	1.37e-33	16.3526	65.842	1.09055	USP33	ubiquitin specific peptidase 33
210965_x_at	1.6e-31	1.4e-33	-16.3479	65.817	-1.08229	CDK13	cyclin dependent kinase 13
202600_s_at	1.62e-31	1.43e-33	16.345	65.801	2.062	NRIP1	nuclear receptor interacting protein 1
214383_x_at	1.67e-31	1.48e-33	16.3386	65.7665	1.62155	KLHDC3	kelch domain containing 3
213016_at	2.16e-31	1.91e-33	16.2909	65.5082	1.93271	BBX	BBX, HMG-box containing
203168_at	2.26e-31	2e-33	-16.283	65.4652	-0.98778	ATF6B	activating transcription factor 6 beta
230461_s_at	2.59e-31	2.31e-33	16.2566	65.322	1.72417	MUM1	melanoma associated antigen (mutated) 1
207545_s_at	2.62e-31	2.33e-33	-16.2546	65.3111	-1.2226	LOC101930388///LOC101928143///NUMB	uncharacterized LOC101930388///uncharacterized LOC101928143///NUMB, endocytic adaptor protein
221744_at	2.68e-31	2.4e-33	-16.2496	65.284	-1.17995	DCAF7	DDB1 and CUL4 associated factor 7
213792_s_at	2.84e-31	2.54e-33	-16.2389	65.2257	-1.62774	INSR	insulin receptor
220828_s_at	2.9e-31	2.6e-33	-16.2346	65.2027	-0.797524	LOC55338	uncharacterized LOC55338
226363_at	2.91e-31	2.61e-33	-16.2338	65.1981	-2.29351	ABCC5	ATP binding cassette subfamily C member 5
224152_s_at	2.96e-31	2.67e-33	16.2301	65.1779	1.18749	PBRM1	polybromo 1
228538_at	3.28e-31	2.96e-33	-16.2108	65.0735	-2.74053	ZNF662	zinc finger protein 662
227069_at	3.37e-31	3.04e-33	16.2059	65.0466	2.04061	CUX1	cut like homeobox 1
218148_at	3.39e-31	3.07e-33	16.2044	65.0384	1.50607	CENPT	centromere protein T
232801_at	3.46e-31	3.13e-33	16.2003	65.0165	0.828487	ERCC6L2	ERCC excision repair 6 like 2
208677_s_at	3.71e-31	3.37e-33	16.1871	64.9446	1.76991	BSG	basigin (Ok blood group)
208997_s_at	3.76e-31	3.42e-33	16.1843	64.9294	2.0578	UCP2	uncoupling protein 2
239364_at	3.78e-31	3.45e-33	16.1829	64.9217	1.3971	ETV6	ETS variant 6
206471_s_at	3.93e-31	3.6e-33	16.1752	64.88	2.10171	PLXNC1	plexin C1
220088_at	4.24e-31	3.88e-33	16.161	64.8029	2.75066	C5AR1	complement component 5a receptor 1
218290_at	4.36e-31	4.01e-33	-16.1553	64.7716	-1.32121	MIR6789///PLEKHJ1	microRNA 6789///pleckstrin homology domain containing J1
236224_at	4.46e-31	4.11e-33	16.1508	64.7475	1.90491	RIT1	Ras like without CAAX 1
242918_at	4.75e-31	4.39e-33	-16.1385	64.6802	-2.08119	NASP	nuclear autoantigenic sperm protein
208328_s_at	4.77e-31	4.43e-33	-16.1371	64.6728	-1.52094	MEF2A	myocyte enhancer factor 2A
226956_at	5.21e-31	4.85e-33	-16.1205	64.5823	-1.3351	MTMR3	myotubularin related protein 3
228556_at	5.68e-31	5.3e-33	-16.1041	64.4933	-1.09047	YTHDC1	YTH domain containing 1
214934_at	5.91e-31	5.55e-33	-16.0957	64.4474	-1.81592	ATP9B	ATPase phospholipid transporting 9B (putative)
224771_at	5.94e-31	5.6e-33	16.0943	64.4396	2.19274	NAV1	neuron navigator 1
218487_at	6.4e-31	6.05e-33	-16.08	64.3618	-1.25358	ALAD	aminolevulinate dehydratase
1563842_at	6.59e-31	6.24e-33	16.0742	64.3306	0.8487	PIGG	phosphatidylinositol glycan anchor biosynthesis class G
239023_at	7.37e-31	7.01e-33	16.0531	64.2155	1.25186	CDC42SE1	CDC42 small effector 1
221638_s_at	7.64e-31	7.28e-33	16.0463	64.1783	2.18887	STX16	syntaxin 16
41512_at	8.19e-31	7.83e-33	-16.0328	64.105	-1.19066	BRAP	BRCA1 associated protein
1554447_at	8.72e-31	8.36e-33	-16.021	64.0405	-2.10374	JPX	JPX transcript, XIST activator (non-protein coding)
232371_at	9.03e-31	8.67e-33	-16.0143	64.0039	-1.56346	2019-03-07	membrane associated ring-CH-type finger 7
202145_at	9.07e-31	8.73e-33	16.013	63.997	3.0932	LY6E	lymphocyte antigen 6 complex, locus E
65133_i_at	9.3e-31	8.98e-33	16.0077	63.9682	1.34466	INO80B-WBP1///INO80B	INO80B-WBP1 readthrough (NMD candidate)///INO80 complex subunit B
209727_at	9.61e-31	9.3e-33	16.0015	63.934	1.62445	GM2A	GM2 ganglioside activator
230028_at	9.71e-31	9.43e-33	15.9989	63.9201	1.79027	KIAA0907	KIAA0907
227954_at	9.95e-31	9.68e-33	-15.9941	63.8938	-1.44094	ITPRIPL2	inositol 1,4,5-trisphosphate receptor interacting protein like 2
222006_at	1.05e-30	1.02e-32	-15.9848	63.843	-1.37391	LETM1	leucine zipper and EF-hand containing transmembrane protein 1
225858_s_at	1.16e-30	1.13e-32	-15.9661	63.741	-1.3373	XIAP	X-linked inhibitor of apoptosis
238013_at	1.16e-30	1.13e-32	15.9656	63.7383	2.39011	PLEKHA2	pleckstrin homology domain containing A2
226041_at	1.18e-30	1.16e-32	-15.9617	63.717	-2.55359	NAPEPLD	N-acyl phosphatidylethanolamine phospholipase D
235917_at	1.24e-30	1.22e-32	-15.9524	63.6662	-1.04332	INIP	INTS3 and NABP interacting protein
209013_x_at	1.29e-30	1.27e-32	15.9443	63.6221	1.86985	TRIO	trio Rho guanine nucleotide exchange factor
205074_at	1.3e-30	1.28e-32	-15.9432	63.6158	-1.74927	SLC22A5	solute carrier family 22 member 5
206474_at	1.33e-30	1.32e-32	15.938	63.5873	1.41288	CDK17	cyclin dependent kinase 17
229517_at	1.37e-30	1.36e-32	-15.932	63.5547	-1.40036	PTPDC1	protein tyrosine phosphatase domain containing 1
235754_at	1.4e-30	1.4e-32	-15.9272	63.5283	-1.3627	HFE	hemochromatosis
202984_s_at	1.57e-30	1.57e-32	-15.9058	63.4115	-1.71485	BAG5	BCL2 associated athanogene 5
222886_at	1.62e-30	1.62e-32	-15.8997	63.3785	-0.917481	NSUN3	NOP2/Sun RNA methyltransferase family member 3
231358_at	1.72e-30	1.73e-32	-15.8885	63.3174	-1.71152	MRO	maestro
201082_s_at	1.87e-30	1.88e-32	15.873	63.2325	1.38398	SLC4A5///DCTN1	solute carrier family 4 member 5///dynactin subunit 1
201661_s_at	2.25e-30	2.28e-32	-15.838	63.041	-1.95097	ACSL3	acyl-CoA synthetase long-chain family member 3
221600_s_at	2.53e-30	2.57e-32	-15.8164	62.9226	-1.53353	AAMDC	adipogenesis associated Mth938 domain containing
202509_s_at	2.62e-30	2.67e-32	15.8094	62.8846	1.26196	TNFAIP2	TNF alpha induced protein 2
232442_at	2.72e-30	2.78e-32	-15.8023	62.8452	-1.24125	BCAR1	BCAR1, Cas family scaffolding protein
215037_s_at	2.78e-30	2.84e-32	15.7981	62.8225	2.10688	BCL2L1	BCL2 like 1
241820_at	2.85e-30	2.92e-32	15.7934	62.7966	1.3311	RIF1	replication timing regulatory factor 1
203205_at	2.87e-30	2.95e-32	-15.7913	62.7849	-0.840275	KDM4A	lysine demethylase 4A
223771_at	2.89e-30	2.97e-32	-15.7902	62.7792	-0.977522	TMEM87A	transmembrane protein 87A
227461_at	2.96e-30	3.05e-32	-15.785	62.7509	-2.04905	STON2	stonin 2
209456_s_at	2.99e-30	3.09e-32	15.7827	62.7379	1.62084	FBXW11	F-box and WD repeat domain containing 11
241858_at	3.05e-30	3.16e-32	-15.7788	62.7165	-1.32265	TNNI3K	TNNI3 interacting kinase
217903_at	3.13e-30	3.26e-32	15.7733	62.6867	1.43178	STRN4	striatin 4
232221_x_at	3.4e-30	3.55e-32	-15.7575	62.5997	-0.882565	RSBN1L	round spermatid basic protein 1 like
201711_x_at	3.49e-30	3.65e-32	15.7525	62.5723	1.71646	RANBP2	RAN binding protein 2
202111_at	3.68e-30	3.86e-32	15.7424	62.5171	1.75776	SLC4A2	solute carrier family 4 member 2
224982_at	3.73e-30	3.92e-32	15.7398	62.5028	1.31188	AKT1S1	AKT1 substrate 1
1556607_at	3.74e-30	3.93e-32	-15.7391	62.4989	-0.985825	EHD4	EH domain containing 4
218265_at	3.85e-30	4.05e-32	-15.7335	62.4687	-0.999519	SECISBP2	SECIS binding protein 2
211504_x_at	3.86e-30	4.07e-32	15.7327	62.4639	1.42767	ROCK2	Rho associated coiled-coil containing protein kinase 2
209213_at	3.91e-30	4.13e-32	-15.7301	62.4496	-2.2326	CBR1	carbonyl reductase 1
1559067_a_at	4.18e-30	4.43e-32	-15.7173	62.3795	-1.64877	LOC158402	uncharacterized LOC158402
214705_at	4.35e-30	4.62e-32	-15.7096	62.3375	-2.24992	PATJ	PATJ, crumbs cell polarity complex component
229128_s_at	4.58e-30	4.88e-32	15.6999	62.284	2.48034	ANP32E	acidic nuclear phosphoprotein 32 family member E
237741_at	4.89e-30	5.21e-32	15.6878	62.2177	1.82004	SLC25A36	solute carrier family 25 member 36
220602_s_at	4.96e-30	5.29e-32	-15.6851	62.2029	-1.91749	LOC101929479///LOC727751///LOC642423///GOLGA2P7///GOLGA2P10	golgin subfamily A member 2///golgin A2 pseudogene///golgin A2 pseudogene///golgin A2 pseudogene 7///golgin A2 pseudogene 10
219579_at	4.96e-30	5.3e-32	15.6848	62.2011	1.03088	RAB3IL1	RAB3A interacting protein like 1
235189_at	5.92e-30	6.37e-32	15.6516	62.019	1.61049	ICE2	interactor of little elongation complex ELL subunit 2
223124_s_at	6.34e-30	6.83e-32	-15.639	61.9494	-0.930124	PITHD1	PITH domain containing 1
223730_at	6.53e-30	7.04e-32	15.6333	61.9185	2.50664	GPC6	glypican 6
238505_at	6.71e-30	7.25e-32	15.6281	61.8898	1.22653	ADPRH	ADP-ribosylarginine hydrolase
219717_at	6.83e-30	7.4e-32	-15.6245	61.8698	-1.56843	DCAF16	DDB1 and CUL4 associated factor 16
241425_at	6.97e-30	7.56e-32	15.6206	61.8486	1.60459	NUP58	nucleoporin 58
239120_at	7.15e-30	7.77e-32	-15.6155	61.8206	-1.73435	TMEM51-AS1	TMEM51 antisense RNA 1
206748_s_at	7.72e-30	8.41e-32	15.6011	61.7414	1.48293	SPAG9	sperm associated antigen 9
212601_at	7.79e-30	8.5e-32	-15.5992	61.731	-1.30138	ZZEF1	zinc finger ZZ-type and EF-hand domain containing 1
212356_at	7.93e-30	8.67e-32	-15.5956	61.7112	-1.25863	KHNYN	KH and NYN domain containing
212876_at	8.82e-30	9.66e-32	-15.5761	61.6037	-1.58316	B4GALT4	beta-1,4-galactosyltransferase 4
1569369_at	8.97e-30	9.85e-32	-15.5726	61.5847	-1.57674	ZFYVE28	zinc finger FYVE-type containing 28
1553991_s_at	9.28e-30	1.02e-31	-15.5659	61.5479	-1.8433	LOC101928274///VSIG10	uncharacterized LOC101928274///V-set and immunoglobulin domain containing 10
212107_s_at	9.89e-30	1.09e-31	15.5539	61.4818	1.73203	DHX9	DEAH-box helicase 9
202621_at	1.04e-29	1.15e-31	15.5447	61.431	1.21336	IRF3	interferon regulatory factor 3
230287_at	1.07e-29	1.19e-31	-15.5385	61.3969	-2.14392	SGSM1	small G protein signaling modulator 1
218169_at	1.15e-29	1.28e-31	15.5259	61.3277	1.25092	VAC14	Vac14, PIKFYVE complex component
229713_at	1.32e-29	1.47e-31	15.5001	61.1857	1.91328	PIP4K2A	phosphatidylinositol-5-phosphate 4-kinase type 2 alpha
220686_s_at	1.41e-29	1.58e-31	-15.4871	61.114	-2.0364	PIWIL2	piwi like RNA-mediated gene silencing 2
236241_at	1.44e-29	1.63e-31	-15.4819	61.0854	-1.55849	MED31	mediator complex subunit 31
225124_at	1.46e-29	1.64e-31	15.4799	61.0741	1.5478	PPP1R9B	protein phosphatase 1 regulatory subunit 9B
212437_at	1.63e-29	1.85e-31	15.4591	60.9598	1.49613	CENPB	centromere protein B
208721_s_at	1.68e-29	1.91e-31	15.453	60.926	1.27153	ANAPC5	anaphase promoting complex subunit 5
215460_x_at	1.72e-29	1.95e-31	-15.4489	60.9034	-1.0867	BRD1	bromodomain containing 1
242153_at	1.73e-29	1.98e-31	-15.4467	60.8911	-1.88043	LARP1B	La ribonucleoprotein domain family member 1B
1555015_a_at	1.74e-29	1.98e-31	15.4463	60.889	0.734974	ZNF398	zinc finger protein 398
223784_at	1.76e-29	2.01e-31	-15.4435	60.8734	-3.36407	TMEM27	transmembrane protein 27
200712_s_at	1.82e-29	2.09e-31	15.4368	60.8367	1.31346	MAPRE1	microtubule associated protein RP/EB family member 1
214313_s_at	1.94e-29	2.23e-31	-15.4248	60.7705	-1.44005	EIF5B	eukaryotic translation initiation factor 5B
207824_s_at	1.95e-29	2.25e-31	15.4235	60.7632	1.80149	MAZ	MYC associated zinc finger protein
241364_at	1.98e-29	2.29e-31	-15.4205	60.7469	-1.5742	TMEM57	transmembrane protein 57
214336_s_at	2.07e-29	2.38e-31	15.4128	60.7044	2.00291	COPA	coatomer protein complex subunit alpha
227981_at	2.26e-29	2.62e-31	-15.396	60.6115	-0.905671	CYB561D1	cytochrome b561 family member D1
1555166_a_at	2.5e-29	2.91e-31	-15.3767	60.505	-0.985933	ZNF396	zinc finger protein 396
224998_at	2.51e-29	2.92e-31	-15.376	60.5011	-2.57848	CMTM4	CKLF like MARVEL transmembrane domain containing 4
233360_at	2.65e-29	3.1e-31	-15.3654	60.4425	-1.03244	UBE2I	ubiquitin conjugating enzyme E2 I
230848_s_at	2.84e-29	3.33e-31	15.3526	60.3716	1.21946	MGA	MGA, MAX dimerization protein
205808_at	3e-29	3.53e-31	15.3424	60.3152	1.79291	ASPH	aspartate beta-hydroxylase
210892_s_at	3.09e-29	3.63e-31	15.337	60.2858	1.51561	GTF2I	general transcription factor IIi
241455_at	3.25e-29	3.84e-31	-15.3271	60.2309	-2.87398	C6orf132	chromosome 6 open reading frame 132
230077_at	3.29e-29	3.9e-31	-15.3243	60.2153	-2.35104	SDHAP2///SDHAP1///LOC220729///SDHA	succinate dehydrogenase complex flavoprotein subunit A pseudogene 2///succinate dehydrogenase complex flavoprotein subunit A pseudogene 1///succinate dehydrogenase complex flavoprotein subunit A pseudogene///succinate dehydrogenase complex flavoprotein subunit A
1553962_s_at	3.29e-29	3.9e-31	15.3243	60.2156	3.01966	RHOB	ras homolog family member B
213212_x_at	3.67e-29	4.36e-31	-15.3041	60.1039	-1.92763	LOC102724093///GOLGA6L4///GOLGA6L9///GOLGA6L5P	golgin subfamily A member 6-like protein 4///golgin A6 family-like 4///golgin A6 family-like 9///golgin A6 family-like 5, pseudogene
210428_s_at	3.72e-29	4.42e-31	15.3015	60.0893	1.10589	HGS	hepatocyte growth factor-regulated tyrosine kinase substrate
215393_s_at	3.84e-29	4.58e-31	-15.2954	60.0555	-0.987372	COBLL1	cordon-bleu WH2 repeat protein like 1
236205_at	3.85e-29	4.6e-31	-15.2946	60.0511	-2.19204	ABCC6P1	ATP binding cassette subfamily C member 6 pseudogene 1
203456_at	4.32e-29	5.17e-31	15.2735	59.9342	1.93528	PRAF2	PRA1 domain family member 2
1556012_at	4.51e-29	5.41e-31	-15.2654	59.8897	-2.72329	KLHDC7A	kelch domain containing 7A
207555_s_at	4.69e-29	5.63e-31	-15.2581	59.8492	-0.987965	TBXA2R	thromboxane A2 receptor
224427_s_at	4.76e-29	5.73e-31	15.2549	59.8316	0.820706	PAPOLG	poly(A) polymerase gamma
39854_r_at	4.76e-29	5.72e-31	15.2551	59.8326	1.09402	PNPLA2	patatin like phospholipase domain containing 2
242679_at	4.9e-29	5.92e-31	15.249	59.7991	1.32355	TTN-AS1	TTN antisense RNA 1
205740_s_at	4.97e-29	6.01e-31	15.2464	59.7846	1.36802	RBM42	RNA binding motif protein 42
216867_s_at	5.93e-29	7.2e-31	-15.2138	59.6037	-1.89339	PDGFA	platelet derived growth factor subunit A
201052_s_at	5.93e-29	7.22e-31	15.2135	59.602	1.19986	PSMF1	proteasome inhibitor subunit 1
225454_at	6.36e-29	7.77e-31	15.2002	59.5288	1.12456	CCDC124	coiled-coil domain containing 124
219267_at	6.89e-29	8.48e-31	-15.1846	59.4418	-1.4529	GLTP	glycolipid transfer protein
228222_at	6.89e-29	8.5e-31	15.1841	59.4395	1.62937	PPP1CB	protein phosphatase 1 catalytic subunit beta
209007_s_at	7.02e-29	8.68e-31	-15.1804	59.4187	-1.54907	RSRP1	arginine and serine rich protein 1
208364_at	7.27e-29	9.01e-31	15.1737	59.3815	0.850611	INPP4A	inositol polyphosphate-4-phosphatase type I A
1552400_a_at	7.56e-29	9.38e-31	-15.1663	59.3405	-1.39058	TMEM266	transmembrane protein 266
200948_at	7.69e-29	9.57e-31	15.1628	59.3213	1.29072	MLF2	myeloid leukemia factor 2
56256_at	7.95e-29	9.91e-31	-15.1564	59.2859	-1.85097	SIDT2	SID1 transmembrane family member 2
230494_at	7.95e-29	9.92e-31	15.1563	59.2851	2.50365	SLC20A1	solute carrier family 20 member 1
200634_at	8.06e-29	1.01e-30	15.1533	59.2688	1.06896	PFN1	profilin 1
204629_at	8.06e-29	1.01e-30	15.1533	59.2684	1.87051	PARVB	parvin beta
219861_at	8.53e-29	1.07e-30	-15.1424	59.2082	-0.952448	DNAJC17	DnaJ heat shock protein family (Hsp40) member C17
205021_s_at	8.58e-29	1.08e-30	15.1411	59.201	1.05383	FOXN3	forkhead box N3
220633_s_at	8.86e-29	1.12e-30	15.1351	59.1679	1.13583	HP1BP3	heterochromatin protein 1 binding protein 3
214745_at	8.92e-29	1.13e-30	-15.1337	59.1598	-1.92755	PLCH1	phospholipase C eta 1
219018_s_at	9.49e-29	1.2e-30	-15.1223	59.0964	-0.807064	CCDC85C	coiled-coil domain containing 85C
1554553_s_at	9.55e-29	1.21e-30	15.1207	59.0876	1.40619	YIF1B	Yip1 interacting factor homolog B, membrane trafficking protein
222472_at	1.05e-28	1.34e-30	-15.1025	58.9866	-1.50456	AFTPH	aftiphilin
230737_s_at	1.08e-28	1.37e-30	-15.098	58.9619	-1.24713	SVIL-AS1///PTCHD3P1	SVIL antisense RNA 1///patched domain containing 3 pseudogene 1
217597_x_at	1.1e-28	1.41e-30	-15.0932	58.9351	-1.73487	RAB40B	RAB40B, member RAS oncogene family
234972_at	1.1e-28	1.41e-30	-15.0934	58.9364	-0.996426	ARL16	ADP ribosylation factor like GTPase 16
201141_at	1.16e-28	1.49e-30	15.0839	58.8835	2.83535	GPNMB	glycoprotein nmb
220016_at	1.17e-28	1.5e-30	-15.0815	58.8704	-1.90987	AHNAK	AHNAK nucleoprotein
236155_at	1.21e-28	1.56e-30	-15.0749	58.8335	-1.64844	ZCCHC6	zinc finger CCHC-type containing 6
227071_at	1.22e-28	1.57e-30	15.0736	58.8262	0.67057	ZNF414	zinc finger protein 414
212076_at	1.29e-28	1.67e-30	15.063	58.7675	1.38165	KMT2A	lysine methyltransferase 2A
222576_s_at	1.33e-28	1.72e-30	15.0574	58.7366	1.19387	AGO1	argonaute 1, RISC catalytic component
208987_s_at	1.38e-28	1.79e-30	15.0508	58.6999	1.03014	KDM2A	lysine demethylase 2A
227435_at	1.39e-28	1.81e-30	-15.0482	58.685	-1.54037	USF3	upstream transcription factor family member 3
1553694_a_at	1.4e-28	1.83e-30	15.0468	58.6776	1.61748	PIK3C2A	phosphatidylinositol-4-phosphate 3-kinase catalytic subunit type 2 alpha
242667_at	1.42e-28	1.86e-30	-15.0432	58.6576	-1.12974	TLR3	toll like receptor 3
205095_s_at	1.42e-28	1.86e-30	15.044	58.6618	1.18085	ATP6V0A1	ATPase H+ transporting V0 subunit a1
222670_s_at	1.42e-28	1.86e-30	15.044	58.6619	2.09579	MAFB	MAF bZIP transcription factor B
208954_s_at	1.47e-28	1.93e-30	-15.0371	58.6235	-1.21081	LARP4B	La ribonucleoprotein domain family member 4B
213905_x_at	1.5e-28	1.98e-30	15.0322	58.5965	3.64604	BGN	biglycan
1555514_a_at	1.61e-28	2.12e-30	15.02	58.5285	1.02945	PIAS2	protein inhibitor of activated STAT 2
231061_at	1.65e-28	2.19e-30	-15.0142	58.4962	-0.873734	MIR302B	microRNA 302b
237510_at	1.69e-28	2.24e-30	-15.0104	58.4754	-0.879912	MYNN	myoneurin
224210_s_at	1.74e-28	2.31e-30	-15.005	58.4451	-1.33037	PXMP4	peroxisomal membrane protein 4
228503_at	1.77e-28	2.36e-30	-15.0011	58.4234	-1.65192	RPS6KA6	ribosomal protein S6 kinase A6
222501_s_at	1.78e-28	2.37e-30	15.0002	58.4186	1.92181	REPIN1	replication initiator 1
201315_x_at	1.8e-28	2.4e-30	14.9979	58.4054	1.67611	IFITM2	interferon induced transmembrane protein 2
227716_at	1.81e-28	2.43e-30	14.9959	58.3945	1.13493	UBXN11	UBX domain protein 11
220553_s_at	2.1e-28	2.82e-30	-14.9693	58.2466	-1.47049	PRPF39	pre-mRNA processing factor 39
1562440_at	2.17e-28	2.92e-30	-14.9628	58.2104	-2.41972	MAP3K13	mitogen-activated protein kinase kinase kinase 13
235143_at	2.17e-28	2.92e-30	-14.9628	58.2102	-1.52394	SLC10A7	solute carrier family 10 member 7
203355_s_at	2.2e-28	2.97e-30	-14.9598	58.1936	-2.80019	PSD3	pleckstrin and Sec7 domain containing 3
224173_s_at	2.32e-28	3.13e-30	14.9504	58.1412	1.44297	MRPL30	mitochondrial ribosomal protein L30
210620_s_at	2.36e-28	3.2e-30	14.9466	58.1202	1.08043	GTF3C2	general transcription factor IIIC subunit 2
242163_at	2.39e-28	3.24e-30	-14.9443	58.1072	-0.865577	THRAP3	thyroid hormone receptor associated protein 3
230000_at	2.85e-28	3.89e-30	14.9114	57.9243	2.51114	RNF213	ring finger protein 213
204970_s_at	2.97e-28	4.07e-30	-14.9034	57.8795	-1.35165	MAFG	MAF bZIP transcription factor G
202237_at	3e-28	4.11e-30	14.9015	57.8691	3.28293	LOC101928916///NNMT	uncharacterized LOC101928916///nicotinamide N-methyltransferase
212497_at	3.06e-28	4.2e-30	14.8978	57.8484	1.05889	MAPK1IP1L	mitogen-activated protein kinase 1 interacting protein 1 like
214305_s_at	3.13e-28	4.3e-30	14.8935	57.8244	1.03258	SF3B1	splicing factor 3b subunit 1
226768_at	3.34e-28	4.6e-30	14.8814	57.7573	1.02405	GIGYF1	GRB10 interacting GYF protein 1
227199_at	3.38e-28	4.67e-30	-14.8788	57.7429	-1.37494	DIP2A	disco interacting protein 2 homolog A
235464_at	3.54e-28	4.89e-30	-14.8706	57.6971	-0.964184	CSNK1A1	casein kinase 1 alpha 1
205917_at	3.54e-28	4.91e-30	14.8701	57.694	1.63515	ZNF264	zinc finger protein 264
225319_s_at	3.56e-28	4.94e-30	-14.8688	57.6868	-1.05519	FAM104A	family with sequence similarity 104 member A
226770_at	3.61e-28	5.01e-30	-14.8662	57.6723	-2.06756	MAGI3	membrane associated guanylate kinase, WW and PDZ domain containing 3
237262_at	3.68e-28	5.12e-30	-14.8623	57.6509	-2.10025	GAREM1	GRB2 associated regulator of MAPK1 subtype 1
205874_at	3.7e-28	5.15e-30	-14.8615	57.6462	-2.74452	ITPKA	inositol-trisphosphate 3-kinase A
1558546_at	3.72e-28	5.19e-30	-14.8601	57.6382	-0.700954	DNASE1	deoxyribonuclease 1
211014_s_at	3.78e-28	5.28e-30	14.8569	57.6208	1.01855	PML	promyelocytic leukemia
235653_s_at	3.79e-28	5.29e-30	-14.8564	57.6179	-1.27849	THAP6	THAP domain containing 6
204560_at	3.88e-28	5.43e-30	14.852	57.5933	2.82542	FKBP5	FK506 binding protein 5
200703_at	3.9e-28	5.48e-30	-14.8504	57.5845	-0.67414	DYNLL1	dynein light chain LC8-type 1
215512_at	3.94e-28	5.54e-30	14.8484	57.573	1.62706	2019-03-06	membrane associated ring-CH-type finger 6
220609_at	4.06e-28	5.71e-30	-14.8429	57.5425	-2.26344	LOC202181	SUMO interacting motifs containing 1 pseudogene
222511_x_at	4.31e-28	6.08e-30	14.8319	57.4809	1.62771	FAF1	Fas associated factor 1
211914_x_at	4.4e-28	6.22e-30	14.8277	57.4577	0.933858	NF1P9///NF1	neurofibromin 1 pseudogene 9///neurofibromin 1
220532_s_at	4.43e-28	6.28e-30	14.826	57.4484	1.93593	TMEM176B	transmembrane protein 176B
241689_at	4.51e-28	6.4e-30	-14.8227	57.4297	-1.18751	METTL14	methyltransferase like 14
242987_x_at	4.51e-28	6.39e-30	-14.8229	57.4309	-0.689023	LAMA5-AS1	LAMA5 antisense RNA 1
238702_at	4.68e-28	6.65e-30	-14.8157	57.3907	-1.88916	SPTSSB	serine palmitoyltransferase small subunit B
225874_at	5.13e-28	7.3e-30	14.7992	57.2985	1.18813	UBALD1	UBA like domain containing 1
201979_s_at	5.46e-28	7.78e-30	14.7876	57.2342	0.96405	PPP5C	protein phosphatase 5 catalytic subunit
219794_at	5.63e-28	8.03e-30	-14.7821	57.2033	-0.962245	VPS53	VPS53, GARP complex subunit
238761_at	5.94e-28	8.49e-30	14.7721	57.1478	1.57402	ELK4	ELK4, ETS transcription factor
211302_s_at	6.06e-28	8.67e-30	14.7684	57.1266	2.45144	PDE4B	phosphodiesterase 4B
244581_at	6.18e-28	8.85e-30	-14.7648	57.1069	-1.12163	ZBTB20	zinc finger and BTB domain containing 20
241898_at	6.29e-28	9.03e-30	-14.7613	57.0869	-3.02376	LIPH	lipase H
236098_at	6.39e-28	9.18e-30	-14.7582	57.0701	-3.80919	SMIM6	small integral membrane protein 6
217667_at	7.04e-28	1.01e-29	-14.7407	56.9722	-1.46346	SEC14L1P1	SEC14 like 1 pseudogene 1
219129_s_at	7.51e-28	1.08e-29	-14.7289	56.9064	-1.01016	SAP30L	SAP30 like
214879_x_at	7.61e-28	1.1e-29	14.7263	56.8914	0.809708	USF2	upstream transcription factor 2, c-fos interacting
225774_at	7.67e-28	1.11e-29	-14.7247	56.8825	-1.28193	RSPRY1	ring finger and SPRY domain containing 1
214849_at	7.81e-28	1.13e-29	14.7213	56.8638	1.37803	KCTD20	potassium channel tetramerization domain containing 20
213659_at	8.66e-28	1.26e-29	-14.7017	56.7544	-1.26678	ZNF75D	zinc finger protein 75D
1558080_s_at	8.89e-28	1.3e-29	14.6963	56.7239	1.76366	DNAJC3	DnaJ heat shock protein family (Hsp40) member C3
230523_at	9.58e-28	1.4e-29	-14.6824	56.6465	-1.84229	QSOX1	quiescin sulfhydryl oxidase 1
1555106_a_at	9.58e-28	1.41e-29	14.6824	56.6461	1.58446	CTDSPL2	CTD small phosphatase like 2
228777_at	9.62e-28	1.41e-29	-14.6814	56.6406	-1.17679	KBTBD3	kelch repeat and BTB domain containing 3
210461_s_at	1.04e-27	1.53e-29	-14.6678	56.5647	-1.77869	ABLIM1	actin binding LIM protein 1
221753_at	1.06e-27	1.57e-29	14.663	56.5378	1.44657	SSH1	slingshot protein phosphatase 1
203258_at	1.1e-27	1.62e-29	14.6573	56.506	1.30241	DRAP1	DR1 associated protein 1
229410_at	1.17e-27	1.73e-29	-14.6457	56.4412	-0.777599	SLC35E1	solute carrier family 35 member E1
242060_x_at	1.19e-27	1.77e-29	-14.6417	56.4185	-1.5319	PHF11	PHD finger protein 11
212203_x_at	1.19e-27	1.77e-29	14.6414	56.4167	1.49949	IFITM3	interferon induced transmembrane protein 3
225500_x_at	1.24e-27	1.85e-29	14.6334	56.3721	1.1864	SCAF1	SR-related CTD associated factor 1
214738_s_at	1.26e-27	1.88e-29	14.6309	56.3581	1.08734	NEK9	NIMA related kinase 9
1555118_at	1.31e-27	1.96e-29	-14.6235	56.3168	-1.67011	ENTPD3	ectonucleoside triphosphate diphosphohydrolase 3
238681_at	1.32e-27	1.98e-29	-14.6216	56.3064	-2.96395	GDPD1	glycerophosphodiester phosphodiesterase domain containing 1
1561589_a_at	1.39e-27	2.1e-29	-14.611	56.247	-1.49445	NBEAL1	neurobeachin like 1
1562775_at	1.4e-27	2.12e-29	-14.6095	56.2382	-1.28873	NUDT12	nudix hydrolase 12
203718_at	1.43e-27	2.16e-29	14.6062	56.22	1.34034	PNPLA6	patatin like phospholipase domain containing 6
201279_s_at	1.45e-27	2.18e-29	14.6039	56.2071	2.20633	LOC101926921///DAB2	uncharacterized LOC101926921///DAB2, clathrin adaptor protein
232251_at	1.55e-27	2.34e-29	-14.5919	56.1398	-1.53314	NUDT16P1	nudix hydrolase 16 pseudogene 1
1555594_a_at	1.74e-27	2.65e-29	14.5698	56.0164	1.92221	MBNL1	muscleblind like splicing regulator 1
223084_s_at	1.75e-27	2.67e-29	-14.5685	56.0087	-1.38715	CCNDBP1	cyclin D1 binding protein 1
225752_at	1.77e-27	2.7e-29	-14.5664	55.9972	-1.42973	NIPA1	non imprinted in Prader-Willi/Angelman syndrome 1
227159_at	1.83e-27	2.79e-29	14.5605	55.9639	1.34843	GHDC	GH3 domain containing
224580_at	1.86e-27	2.84e-29	14.557	55.9443	1.46079	SLC38A1	solute carrier family 38 member 1
235450_at	1.92e-27	2.94e-29	-14.5513	55.9126	-1.4631	FBXL4	F-box and leucine rich repeat protein 4
214806_at	1.93e-27	2.95e-29	14.5503	55.9067	1.73942	BICD1	BICD cargo adaptor 1
212703_at	1.99e-27	3.05e-29	-14.5446	55.8748	-1.30665	TLN2	talin 2
202121_s_at	2.08e-27	3.19e-29	-14.5366	55.8298	-1.02907	CHMP2A	charged multivesicular body protein 2A
243617_at	2.29e-27	3.52e-29	-14.5189	55.7311	-1.10001	ZNF827	zinc finger protein 827
212510_at	2.36e-27	3.64e-29	-14.5131	55.6983	-1.93141	GPD1L	glycerol-3-phosphate dehydrogenase 1-like
203319_s_at	2.42e-27	3.72e-29	14.5091	55.676	1.36571	ZNF148	zinc finger protein 148
227491_at	2.45e-27	3.78e-29	-14.5066	55.6618	-2.39617	ELOVL6	ELOVL fatty acid elongase 6
233292_s_at	2.61e-27	4.04e-29	14.4944	55.5936	1.05674	ANKHD1-EIF4EBP3///ANKHD1	ANKHD1-EIF4EBP3 readthrough///ankyrin repeat and KH domain containing 1
212090_at	2.67e-27	4.14e-29	14.4903	55.5703	1.81308	GRINA	glutamate ionotropic receptor NMDA type subunit associated protein 1
204869_at	2.73e-27	4.23e-29	-14.4864	55.5486	-1.81186	PCSK2	proprotein convertase subtilisin/kexin type 2
227352_at	2.8e-27	4.35e-29	-14.4814	55.5203	-1.18599	SWSAP1	SWIM-type zinc finger 7 associated protein 1
1557630_s_at	2.87e-27	4.46e-29	-14.4769	55.4953	-0.899806	LOC107984534	uncharacterized LOC107984534
212911_at	2.88e-27	4.48e-29	-14.4764	55.4924	-1.4536	DNAJC16	DnaJ heat shock protein family (Hsp40) member C16
229232_at	3.1e-27	4.83e-29	-14.4628	55.4162	-1.34877	LRRC57	leucine rich repeat containing 57
223111_x_at	3.1e-27	4.84e-29	-14.4627	55.4155	-0.990285	ARID4B	AT-rich interaction domain 4B
219515_at	3.4e-27	5.31e-29	-14.4461	55.3224	-1.15275	PRDM10	PR/SET domain 10
213986_s_at	3.46e-27	5.42e-29	14.4426	55.3029	1.36475	TMEM259	transmembrane protein 259
222708_s_at	3.47e-27	5.44e-29	14.4419	55.2989	0.988157	STX17	syntaxin 17
205523_at	3.48e-27	5.47e-29	-14.441	55.2938	-2.53548	HAPLN1	hyaluronan and proteoglycan link protein 1
220204_s_at	3.57e-27	5.61e-29	14.4364	55.2683	0.981135	BMP8A	bone morphogenetic protein 8a
204472_at	3.7e-27	5.83e-29	14.4296	55.2297	2.99884	GEM	GTP binding protein overexpressed in skeletal muscle
237052_x_at	3.8e-27	6.01e-29	-14.4243	55.2002	-0.716819	GIGYF2	GRB10 interacting GYF protein 2
223327_x_at	3.87e-27	6.12e-29	-14.4209	55.1811	-1.72014	GOLGA2P10	golgin A2 pseudogene 10
216042_at	3.91e-27	6.18e-29	14.4193	55.1717	0.905686	TNFRSF25	TNF receptor superfamily member 25
225462_at	4.24e-27	6.73e-29	-14.4042	55.0871	-1.18008	TMEM128	transmembrane protein 128
216689_x_at	4.33e-27	6.87e-29	14.4006	55.0668	1.40645	ARHGAP1	Rho GTPase activating protein 1
229810_at	4.35e-27	6.92e-29	-14.3991	55.0587	-1.62359	RSPH3	radial spoke 3 homolog
243856_at	4.46e-27	7.1e-29	-14.3945	55.033	-0.858856	LANCL3	LanC like 3
1559413_at	4.48e-27	7.14e-29	-14.3935	55.0272	-1.44231	TCP11L2	t-complex 11 like 2
1556203_a_at	4.52e-27	7.22e-29	14.3917	55.017	1.73924	SRGAP2	SLIT-ROBO Rho GTPase activating protein 2
229266_at	4.94e-27	7.89e-29	-14.3758	54.9279	-2.31317	SHISA6	shisa family member 6
233486_at	5.15e-27	8.24e-29	-14.3683	54.8855	-1.60387	LOC101928881	uncharacterized LOC101928881
226767_s_at	5.62e-27	9.02e-29	-14.3522	54.7949	-2.09321	FAHD1	fumarylacetoacetate hydrolase domain containing 1
241793_at	5.69e-27	9.14e-29	-14.3499	54.782	-0.967677	MSS51	MSS51 mitochondrial translational activator
205729_at	5.79e-27	9.33e-29	14.3463	54.7618	2.61091	OSMR	oncostatin M receptor
206414_s_at	6.11e-27	9.86e-29	-14.3364	54.7062	-1.67953	ASAP2	ArfGAP with SH3 domain, ankyrin repeat and PH domain 2
203692_s_at	6.34e-27	1.03e-28	14.3295	54.6675	1.16214	E2F3	E2F transcription factor 3
221031_s_at	6.39e-27	1.04e-28	14.3279	54.6582	2.7026	APOLD1	apolipoprotein L domain containing 1
240990_at	6.5e-27	1.05e-28	-14.3246	54.6397	-0.962471	RAB5A	RAB5A, member RAS oncogene family
219695_at	6.59e-27	1.07e-28	-14.322	54.6251	-2.53185	SMPD3	sphingomyelin phosphodiesterase 3
1566603_s_at	6.77e-27	1.1e-28	-14.317	54.5973	-1.10577	RPUSD3	RNA pseudouridylate synthase domain containing 3
244615_x_at	7.05e-27	1.15e-28	-14.3095	54.5549	-0.820719	TARSL2	threonyl-tRNA synthetase like 2
242422_at	7.2e-27	1.17e-28	14.3055	54.5322	1.38949	G3BP1	G3BP stress granule assembly factor 1
240284_x_at	7.28e-27	1.19e-28	-14.3034	54.5207	-1.40964	LOC105369635	uncharacterized LOC105369635
232392_at	7.38e-27	1.21e-28	14.3006	54.505	1.79562	SRSF3	serine and arginine rich splicing factor 3
226712_at	7.66e-27	1.26e-28	-14.2936	54.4656	-1.4326	SSR1	signal sequence receptor subunit 1
230774_at	8.46e-27	1.39e-28	-14.2761	54.3667	-1.41092	PTGR2	prostaglandin reductase 2
231240_at	8.51e-27	1.4e-28	14.2748	54.3595	3.66424	DIO2	deiodinase, iodothyronine, type II
48030_i_at	8.95e-27	1.47e-28	14.2657	54.3084	0.670898	FAXDC2	fatty acid hydroxylase domain containing 2
208851_s_at	9.04e-27	1.49e-28	14.2637	54.2972	2.854	THY1	Thy-1 cell surface antigen
206324_s_at	9.2e-27	1.52e-28	-14.2603	54.2777	-1.30611	DAPK2	death associated protein kinase 2
223162_s_at	9.6e-27	1.58e-28	-14.2525	54.2343	-1.74352	KIAA1147	KIAA1147
244786_at	1.02e-26	1.68e-28	-14.2421	54.1754	-1.34855	SCARNA13///SNHG10	small Cajal body-specific RNA 13///small nucleolar RNA host gene 10
218232_at	1.06e-26	1.75e-28	14.2346	54.1333	2.19057	C1QA	complement C1q A chain
244801_at	1.1e-26	1.83e-28	14.2268	54.0893	1.30469	PSMB7	proteasome subunit beta 7
200046_at	1.11e-26	1.84e-28	-14.2262	54.0861	-0.933025	DAD1	defender against cell death 1
241968_at	1.12e-26	1.86e-28	-14.2242	54.0749	-1.05827	ABHD18	abhydrolase domain containing 18
204188_s_at	1.13e-26	1.89e-28	14.2215	54.0593	1.10667	RARG	retinoic acid receptor gamma
229586_at	1.16e-26	1.93e-28	-14.2174	54.0364	-1.664	CHD9	chromodomain helicase DNA binding protein 9
234317_s_at	1.18e-26	1.97e-28	-14.2144	54.0196	-1.58468	STOX2	storkhead box 2
222286_at	1.18e-26	1.97e-28	-14.2145	54.0198	-1.25947	SNAPC3	small nuclear RNA activating complex polypeptide 3
209101_at	1.21e-26	2.02e-28	14.2094	53.9912	2.94971	CTGF	connective tissue growth factor
202054_s_at	1.22e-26	2.05e-28	-14.2073	53.9796	-1.94217	ALDH3A2	aldehyde dehydrogenase 3 family member A2
231408_at	1.22e-26	2.04e-28	-14.2078	53.9824	-1.42116	TMEM92	transmembrane protein 92
235607_at	1.28e-26	2.15e-28	-14.1987	53.9308	-1.01175	LOC101928963	uncharacterized LOC101928963
202022_at	1.29e-26	2.18e-28	-14.1963	53.9176	-1.8756	ALDOC	aldolase, fructose-bisphosphate C
226168_at	1.3e-26	2.19e-28	-14.1957	53.9143	-0.980234	ZFAND2B	zinc finger AN1-type containing 2B
202773_s_at	1.31e-26	2.21e-28	14.1939	53.9038	0.831065	SFSWAP	splicing factor SWAP homolog
1558097_at	1.32e-26	2.23e-28	-14.1923	53.8952	-0.840236	PRR14L	proline rich 14 like
235543_at	1.39e-26	2.36e-28	-14.1818	53.8357	-1.1304	LOC102723779	uncharacterized LOC102723779
1558094_s_at	1.39e-26	2.35e-28	-14.1828	53.8414	-0.993579	CCDC174	coiled-coil domain containing 174
229241_at	1.43e-26	2.44e-28	-14.1766	53.8062	-1.84974	LDHD	lactate dehydrogenase D
235744_at	1.45e-26	2.47e-28	14.1739	53.7914	1.49163	PPTC7	PTC7 protein phosphatase homolog
235604_x_at	1.57e-26	2.68e-28	-14.1599	53.7124	-1.26389	ZNF493	zinc finger protein 493
212167_s_at	1.6e-26	2.74e-28	14.156	53.6904	1.03483	SMARCB1	SWI/SNF related, matrix associated, actin dependent regulator of chromatin, subfamily b, member 1
1561965_at	1.63e-26	2.78e-28	-14.1532	53.6747	-1.00094	SNRPB2	small nuclear ribonucleoprotein polypeptide B2
232145_at	1.65e-26	2.82e-28	-14.1506	53.6598	-1.2628	C2orf68	chromosome 2 open reading frame 68
229075_at	1.67e-26	2.86e-28	-14.1485	53.648	-2.71896	SPATA5	spermatogenesis associated 5
220946_s_at	1.74e-26	2.98e-28	-14.141	53.6059	-1.17833	SETD2	SET domain containing 2
218733_at	1.79e-26	3.07e-28	-14.1359	53.5768	-1.2087	MSL2	male-specific lethal 2 homolog (Drosophila)
1555446_s_at	1.83e-26	3.14e-28	-14.1314	53.5518	-1.3643	TRAPPC10	trafficking protein particle complex 10
210935_s_at	1.86e-26	3.21e-28	14.1277	53.531	1.53919	WDR1	WD repeat domain 1
215684_s_at	1.98e-26	3.41e-28	-14.1173	53.472	-1.23036	ASCC2	activating signal cointegrator 1 complex subunit 2
236535_at	2.06e-26	3.57e-28	-14.1091	53.4261	-1.26507	SMC6	structural maintenance of chromosomes 6
1552389_at	2.21e-26	3.83e-28	-14.0966	53.3551	-3.10062	ERICH5	glutamate rich 5
222158_s_at	2.21e-26	3.83e-28	14.0965	53.3548	1.02197	DESI2	desumoylating isopeptidase 2
218763_at	2.33e-26	4.05e-28	-14.0867	53.2994	-0.963965	STX18	syntaxin 18
201508_at	2.4e-26	4.18e-28	14.0814	53.2692	3.39095	IGFBP4	insulin like growth factor binding protein 4
243135_x_at	2.5e-26	4.35e-28	-14.074	53.2278	-0.964376	SNX8	sorting nexin 8
1557136_at	2.8e-26	4.89e-28	-14.0535	53.112	-2.08144	ATP13A4	ATPase 13A4
215114_at	2.86e-26	5.01e-28	-14.0494	53.0887	-0.996946	SENP3	SUMO1/sentrin/SMT3 specific peptidase 3
211133_x_at	2.86e-26	5e-28	14.0495	53.0893	1.00995	LILRB3	leukocyte immunoglobulin like receptor B3
1560692_at	2.88e-26	5.06e-28	-14.0477	53.0791	-0.702444	VSTM2A-OT1///VSTM2A	VSTM2A overlapping transcript 1///V-set and transmembrane domain containing 2A
212091_s_at	3.04e-26	5.34e-28	14.038	53.0246	3.17851	COL6A1	collagen type VI alpha 1 chain
239772_x_at	3.11e-26	5.47e-28	-14.0339	53.0011	-0.920616	DHX30	DEAH-box helicase 30
231862_at	3.16e-26	5.57e-28	14.0307	52.983	1.77801	CBX5	chromobox 5
203370_s_at	3.2e-26	5.64e-28	14.0283	52.9699	3.73711	PDLIM7	PDZ and LIM domain 7
1554287_at	3.22e-26	5.68e-28	-14.0271	52.963	-2.01702	TRIM4	tripartite motif containing 4
222998_at	3.22e-26	5.69e-28	14.027	52.9624	1.0764	MAF1	MAF1 homolog, negative regulator of RNA polymerase III
227739_at	3.26e-26	5.76e-28	-14.0248	52.9496	-1.11619	NDOR1	NADPH dependent diflavin oxidoreductase 1
241443_at	3.3e-26	5.83e-28	-14.0225	52.9368	-0.950916	ADI1	acireductone dioxygenase 1
202873_at	3.51e-26	6.23e-28	14.0108	52.8707	1.32915	ATP6V1C1	ATPase H+ transporting V1 subunit C1
230151_at	3.52e-26	6.25e-28	-14.0104	52.8682	-1.2922	SPRYD7	SPRY domain containing 7
238635_at	3.52e-26	6.26e-28	14.0102	52.8673	2.14311	TMEM267	transmembrane protein 267
206121_at	3.64e-26	6.48e-28	-14.004	52.8323	-2.86978	AMPD1	adenosine monophosphate deaminase 1
207980_s_at	3.66e-26	6.53e-28	14.0026	52.8245	2.17436	CITED2	Cbp/p300 interacting transactivator with Glu/Asp rich carboxy-terminal domain 2
228638_at	3.68e-26	6.58e-28	14.0012	52.8162	1.57849	FAM76A	family with sequence similarity 76 member A
239339_at	3.82e-26	6.86e-28	-13.9939	52.775	-1.06593	ZNF397	zinc finger protein 397
238795_at	3.82e-26	6.85e-28	13.9942	52.7768	1.18873	FAM208B	family with sequence similarity 208 member B
207071_s_at	3.83e-26	6.88e-28	-13.9935	52.7731	-1.21247	ACO1	aconitase 1
203658_at	3.91e-26	7.04e-28	-13.9894	52.75	-1.58874	SLC25A20	solute carrier family 25 member 20
232000_at	4.08e-26	7.35e-28	-13.9817	52.7061	-1.74038	TTC39B	tetratricopeptide repeat domain 39B
235819_at	4.4e-26	7.95e-28	13.9679	52.6284	1.03439	BTF3L4	basic transcription factor 3 like 4
227962_at	4.46e-26	8.05e-28	-13.9657	52.6158	-1.78879	ACOX1	acyl-CoA oxidase 1
243417_at	4.54e-26	8.22e-28	-13.9621	52.5955	-1.39641	ZADH2	zinc binding alcohol dehydrogenase domain containing 2
226555_at	4.55e-26	8.23e-28	-13.9618	52.5939	-1.02559	INO80D	INO80 complex subunit D
225598_at	4.59e-26	8.32e-28	-13.96	52.5838	-1.83982	SLC45A4	solute carrier family 45 member 4
33768_at	4.63e-26	8.4e-28	13.9584	52.5743	1.017	DMWD	dystrophia myotonica, WD repeat containing
214560_at	4.81e-26	8.73e-28	13.9514	52.5351	1.97742	FPR3	formyl peptide receptor 3
204575_s_at	4.83e-26	8.78e-28	13.9504	52.5295	2.20112	MMP19	matrix metallopeptidase 19
209182_s_at	4.85e-26	8.83e-28	13.9494	52.5235	1.91266	C10orf10	chromosome 10 open reading frame 10
1552656_s_at	5.02e-26	9.15e-28	13.9432	52.4888	1.74562	UHMK1	U2AF homology motif (UHM) kinase 1
241343_at	5.32e-26	9.72e-28	13.9326	52.4286	1.30992	RNASEH1	ribonuclease H1
230561_s_at	5.37e-26	9.83e-28	-13.9307	52.4176	-1.75841	KANSL1L	KAT8 regulatory NSL complex subunit 1 like
230991_at	5.66e-26	1.04e-27	-13.921	52.3633	-1.72113	LOC102724156	uncharacterized LOC102724156
217576_x_at	5.9e-26	1.08e-27	13.9134	52.3203	0.796669	SOS2	SOS Ras/Rho guanine nucleotide exchange factor 2
234939_s_at	5.98e-26	1.1e-27	13.9108	52.3055	0.873354	PHF12	PHD finger protein 12
217486_s_at	6.2e-26	1.14e-27	13.9044	52.269	1.22397	ZDHHC17	zinc finger DHHC-type containing 17
209474_s_at	6.44e-26	1.19e-27	13.8972	52.2282	1.84845	ENTPD1	ectonucleoside triphosphate diphosphohydrolase 1
207186_s_at	6.76e-26	1.25e-27	-13.8883	52.1779	-1.2624	BPTF	bromodomain PHD finger transcription factor
201606_s_at	7.15e-26	1.32e-27	13.8784	52.1217	0.889829	PWP1	PWP1 homolog, endonuclein
226877_at	7.37e-26	1.37e-27	-13.8728	52.0904	-1.57062	RPL32P3	ribosomal protein L32 pseudogene 3
224949_at	7.44e-26	1.38e-27	-13.8708	52.0791	-1.22927	YIPF5	Yip1 domain family member 5
243815_at	7.82e-26	1.45e-27	-13.8619	52.0285	-0.782278	PGBD4	piggyBac transposable element derived 4
1558775_s_at	7.85e-26	1.46e-27	13.861	52.0236	1.28348	NSMAF	neutral sphingomyelinase activation associated factor
213353_at	8.51e-26	1.59e-27	-13.8465	51.9412	-1.96501	ABCA5	ATP binding cassette subfamily A member 5
218422_s_at	9.24e-26	1.72e-27	-13.8318	51.858	-1.48365	RBM26	RNA binding motif protein 26
204002_s_at	9.33e-26	1.74e-27	-13.8299	51.8474	-1.15543	ICA1	islet cell autoantigen 1
201545_s_at	9.43e-26	1.76e-27	-13.8278	51.8354	-1.25559	BCL2L2-PABPN1///PABPN1	BCL2L2-PABPN1 readthrough///poly(A) binding protein nuclear 1
1555904_at	9.67e-26	1.81e-27	-13.8234	51.8103	-1.38095	FRY	FRY microtubule binding protein
222896_at	9.7e-26	1.82e-27	-13.8226	51.8056	-1.97917	TMEM38A	transmembrane protein 38A
208980_s_at	9.72e-26	1.82e-27	13.8221	51.803	0.549302	UBC	ubiquitin C
201039_s_at	9.89e-26	1.86e-27	13.8186	51.7832	1.04164	RAD23A	RAD23 homolog A, nucleotide excision repair protein
228512_at	1e-25	1.88e-27	-13.8162	51.7696	-1.74707	PTCD3	pentatricopeptide repeat domain 3
205160_at	1.01e-25	1.91e-27	-13.8137	51.7556	-1.73889	PEX11A	peroxisomal biogenesis factor 11 alpha
244700_at	1.09e-25	2.06e-27	-13.8003	51.6792	-1.20959	SEC61B	Sec61 translocon beta subunit
218828_at	1.09e-25	2.05e-27	13.8014	51.686	1.21258	TMEM256-PLSCR3///PLSCR3	TMEM256-PLSCR3 readthrough (NMD candidate)///phospholipid scramblase 3
1553297_a_at	1.15e-25	2.17e-27	13.7911	51.6273	1.60279	CSF3R	colony stimulating factor 3 receptor
229650_s_at	1.2e-25	2.28e-27	-13.7827	51.5797	-0.889064	SMIM7	small integral membrane protein 7
216105_x_at	1.22e-25	2.31e-27	13.7806	51.5678	0.878769	PTPA	protein phosphatase 2 phosphatase activator
201647_s_at	1.22e-25	2.32e-27	13.7793	51.5603	1.40351	SCARB2	scavenger receptor class B member 2
243407_at	1.24e-25	2.36e-27	-13.777	51.5475	-1.06325	MFSD8	major facilitator superfamily domain containing 8
232919_at	1.26e-25	2.39e-27	-13.7742	51.5315	-1.2271	AFG3L2	AFG3 like matrix AAA peptidase subunit 2
226741_at	1.26e-25	2.41e-27	-13.7731	51.5253	-0.919822	SLC12A6	solute carrier family 12 member 6
216563_at	1.27e-25	2.42e-27	-13.772	51.5189	-1.86765	ANKRD12	ankyrin repeat domain 12
227991_x_at	1.33e-25	2.54e-27	-13.7635	51.4707	-0.988344	ZBTB43	zinc finger and BTB domain containing 43
218402_s_at	1.33e-25	2.53e-27	-13.7642	51.4747	-0.813767	HPS4	HPS4, biogenesis of lysosomal organelles complex 3 subunit 2
232288_at	1.37e-25	2.63e-27	-13.7575	51.4369	-1.16036	LOC102724985///PDXDC2P///PDXDC1	pyridoxal-dependent decarboxylase domain-containing protein 1///pyridoxal dependent decarboxylase domain containing 2, pseudogene///pyridoxal dependent decarboxylase domain containing 1
210788_s_at	1.39e-25	2.67e-27	-13.755	51.4227	-1.61918	DHRS7	dehydrogenase/reductase 7
230573_at	1.41e-25	2.72e-27	-13.752	51.4055	-3.12186	SGK2	SGK2, serine/threonine kinase 2
227046_at	1.41e-25	2.71e-27	-13.7524	51.4079	-2.46003	SLC39A11	solute carrier family 39 member 11
217959_s_at	1.42e-25	2.74e-27	-13.7505	51.3973	-1.07743	MIR3656///TRAPPC4	microRNA 3656///trafficking protein particle complex 4
212536_at	1.48e-25	2.85e-27	-13.7434	51.3569	-1.5847	ATP11B	ATPase phospholipid transporting 11B (putative)
201162_at	1.48e-25	2.86e-27	13.743	51.3549	2.3474	IGFBP7	insulin like growth factor binding protein 7
239482_x_at	1.52e-25	2.94e-27	-13.7379	51.3256	-1.08899	ZNF708	zinc finger protein 708
1560145_at	1.59e-25	3.07e-27	-13.7305	51.2836	-1.41823	MKLN1	muskelin 1
201208_s_at	1.6e-25	3.1e-27	13.7286	51.2729	1.12113	TNFAIP1	TNF alpha induced protein 1
206709_x_at	1.61e-25	3.12e-27	-13.7274	51.2662	-1.016	GPT	glutamic--pyruvic transaminase
227407_at	1.74e-25	3.39e-27	-13.7133	51.1861	-1.30346	TAPT1	transmembrane anterior posterior transformation 1
209047_at	1.81e-25	3.52e-27	13.7065	51.1478	3.58932	AQP1	aquaporin 1 (Colton blood group)
201720_s_at	1.97e-25	3.82e-27	13.6919	51.0647	2.2264	LAPTM5	lysosomal protein transmembrane 5
231120_x_at	2.01e-25	3.93e-27	-13.6873	51.0386	-3.57398	PKIB	protein kinase (cAMP-dependent, catalytic) inhibitor beta
209750_at	2.03e-25	3.96e-27	13.6856	51.0292	2.07671	NR1D2	nuclear receptor subfamily 1 group D member 2
204192_at	2.04e-25	3.98e-27	13.685	51.0256	3.18537	CD37	CD37 molecule
229192_s_at	2.06e-25	4.02e-27	13.6831	51.0147	1.0643	LOC101929597///TBCD	uncharacterized LOC101929597///tubulin folding cofactor D
219223_at	2.1e-25	4.12e-27	-13.6787	50.99	-1.36481	CACFD1	calcium channel flower domain containing 1
210601_at	2.12e-25	4.16e-27	13.677	50.9802	0.673421	CDH6	cadherin 6
1555266_a_at	2.2e-25	4.33e-27	13.6702	50.9414	1.40408	ASXL2	additional sex combs like 2, transcriptional regulator
211205_x_at	2.2e-25	4.31e-27	13.6709	50.9457	1.53496	PIP5K1A	phosphatidylinositol-4-phosphate 5-kinase type 1 alpha
225217_s_at	2.21e-25	4.34e-27	-13.6698	50.9392	-1.06942	BRPF3	bromodomain and PHD finger containing 3
226111_s_at	2.22e-25	4.36e-27	13.6688	50.9337	0.922918	ZNF385A	zinc finger protein 385A
214257_s_at	2.23e-25	4.39e-27	13.6676	50.9269	1.2842	SEC22B	SEC22 homolog B, vesicle trafficking protein (gene/pseudogene)
238901_at	2.25e-25	4.44e-27	-13.6658	50.9166	-0.889588	LINC01133	long intergenic non-protein coding RNA 1133
231111_at	2.27e-25	4.47e-27	-13.6645	50.9094	-1.96232	SCYL3	SCY1 like pseudokinase 3
225095_at	2.31e-25	4.57e-27	-13.6608	50.888	-1.7641	SPTLC2	serine palmitoyltransferase long chain base subunit 2
227982_at	2.39e-25	4.73e-27	-13.6546	50.8532	-1.6019	SEPSECS	Sep (O-phosphoserine) tRNA:Sec (selenocysteine) tRNA synthase
238912_x_at	2.41e-25	4.77e-27	-13.6533	50.8456	-1.12085	C9orf85	chromosome 9 open reading frame 85
225876_at	2.43e-25	4.82e-27	-13.6513	50.8342	-1.15053	NIPAL3	NIPA like domain containing 3
229676_at	2.5e-25	4.96e-27	13.6463	50.8058	1.38128	MTPAP	mitochondrial poly(A) polymerase
201346_at	2.62e-25	5.2e-27	-13.6381	50.7593	-1.30739	ADIPOR2	adiponectin receptor 2
204480_s_at	2.64e-25	5.26e-27	13.6361	50.7479	1.51504	C9orf16	chromosome 9 open reading frame 16
201169_s_at	2.68e-25	5.33e-27	13.6337	50.734	1.99886	BHLHE40	basic helix-loop-helix family member e40
202223_at	2.73e-25	5.43e-27	-13.6304	50.7155	-1.48663	STT3A	STT3A, catalytic subunit of the oligosaccharyltransferase complex
242774_at	2.74e-25	5.47e-27	13.6293	50.7091	2.03878	SYNE2	spectrin repeat containing nuclear envelope protein 2
200756_x_at	2.8e-25	5.59e-27	13.6254	50.687	1.20526	CALU	calumenin
209895_at	2.83e-25	5.66e-27	13.6231	50.6743	1.23709	PTPN11	protein tyrosine phosphatase, non-receptor type 11
1566471_at	2.89e-25	5.77e-27	13.6197	50.6548	0.733283	LOC100996506	uncharacterized LOC100996506
239391_at	3e-25	6.01e-27	-13.6126	50.6145	-0.802271	FAM120AOS	family with sequence similarity 120A opposite strand
211622_s_at	3.09e-25	6.2e-27	13.6073	50.5844	1.22645	ARF3	ADP ribosylation factor 3
236669_at	3.46e-25	6.95e-27	13.5872	50.4702	0.780652	SDCBP2-AS1	SDCBP2 antisense RNA 1
236533_at	3.5e-25	7.05e-27	13.5846	50.4555	1.36715	ASAP1	ArfGAP with SH3 domain, ankyrin repeat and PH domain 1
224945_at	3.56e-25	7.19e-27	-13.5813	50.4364	-0.931286	BTBD7	BTB domain containing 7
201041_s_at	3.56e-25	7.18e-27	13.5816	50.4381	2.26714	DUSP1	dual specificity phosphatase 1
226171_at	3.59e-25	7.26e-27	-13.5797	50.4272	-1.41043	ZDHHC3	zinc finger DHHC-type containing 3
203828_s_at	3.61e-25	7.3e-27	13.5787	50.4219	2.42271	IL32	interleukin 32
228303_at	3.64e-25	7.36e-27	-13.5771	50.413	-3.02544	GALNT6	polypeptide N-acetylgalactosaminyltransferase 6
208919_s_at	3.73e-25	7.56e-27	-13.5726	50.3869	-1.17976	NADK	NAD kinase
235505_s_at	3.93e-25	8e-27	-13.5625	50.3299	-1.32845	LRPAP1	LDL receptor related protein associated protein 1
233642_s_at	3.99e-25	8.13e-27	-13.5598	50.3144	-1.10209	HEATR5B	HEAT repeat containing 5B
223465_at	4.22e-25	8.61e-27	-13.5498	50.2574	-1.47022	COL4A3BP	collagen type IV alpha 3 binding protein
219235_s_at	4.23e-25	8.64e-27	-13.5491	50.2538	-1.55298	PHACTR4	phosphatase and actin regulator 4
227140_at	4.25e-25	8.67e-27	13.5484	50.2495	4.6813	INHBA	inhibin beta A subunit
239035_at	4.26e-25	8.71e-27	-13.5477	50.2453	-1.07148	MTHFR	methylenetetrahydrofolate reductase (NAD(P)H)
213807_x_at	4.33e-25	8.88e-27	13.5444	50.2267	1.28252	MET	MET proto-oncogene, receptor tyrosine kinase
226901_at	4.37e-25	8.96e-27	-13.5428	50.2178	-1.54523	C17orf58	chromosome 17 open reading frame 58
225025_at	4.37e-25	8.96e-27	13.5427	50.2173	1.2773	IGSF8	immunoglobulin superfamily member 8
238550_at	4.39e-25	9.02e-27	-13.5416	50.211	-0.934583	RUFY2	RUN and FYVE domain containing 2
225979_at	4.52e-25	9.28e-27	13.5365	50.1821	1.49754	PLEKHG2	pleckstrin homology and RhoGEF domain containing G2
227020_at	4.54e-25	9.34e-27	-13.5354	50.1758	-1.47037	YPEL2	yippee like 2
1559042_at	4.61e-25	9.5e-27	-13.5324	50.1586	-0.809905	NDUFB6	NADH:ubiquinone oxidoreductase subunit B6
214487_s_at	4.63e-25	9.54e-27	13.5317	50.1545	1.27435	RAP2B///RAP2A	RAP2B, member of RAS oncogene family///RAP2A, member of RAS oncogene family
203394_s_at	4.73e-25	9.75e-27	-13.5279	50.1331	-2.14218	HES1	hes family bHLH transcription factor 1
1555972_s_at	4.93e-25	1.02e-26	13.5203	50.0899	1.03686	FBXO28	F-box protein 28
211992_at	4.95e-25	1.02e-26	13.5195	50.0853	1.21591	WNK1	WNK lysine deficient protein kinase 1
220521_s_at	5.17e-25	1.07e-26	13.5115	50.0399	1.49575	ATG16L1	autophagy related 16 like 1
204265_s_at	5.31e-25	1.1e-26	13.5067	50.0122	1.3945	GPSM3	G-protein signaling modulator 3
1564333_a_at	5.41e-25	1.12e-26	-13.5029	49.9909	-3.11882	PSAPL1	prosaposin-like 1 (gene/pseudogene)
221177_at	5.41e-25	1.12e-26	-13.5032	49.9923	-1.34199	MIA2	melanoma inhibitory activity 2
219632_s_at	5.44e-25	1.13e-26	-13.5018	49.9842	-1.19843	SHPK///TRPV1	sedoheptulokinase///transient receptor potential cation channel subfamily V member 1
243386_at	5.48e-25	1.14e-26	-13.5004	49.9764	-2.57394	CASZ1	castor zinc finger 1
226596_x_at	5.65e-25	1.18e-26	-13.4948	49.9446	-1.7277	UMAD1	UBAP1-MVB12-associated (UMA) domain containing 1
206127_at	5.65e-25	1.18e-26	13.4949	49.9452	1.31838	ELK3	ELK3, ETS transcription factor
221695_s_at	5.66e-25	1.18e-26	13.4941	49.9405	1.20189	MAP3K2	mitogen-activated protein kinase kinase kinase 2
226050_at	5.85e-25	1.22e-26	-13.4881	49.9068	-1.6016	TMCO3	transmembrane and coiled-coil domains 3
223425_at	5.85e-25	1.23e-26	13.488	49.9059	1.28607	RAVER1	ribonucleoprotein, PTB binding 1
218444_at	5.96e-25	1.25e-26	13.4848	49.8876	0.990654	ALG12	ALG12, alpha-1,6-mannosyltransferase
1553957_at	5.98e-25	1.25e-26	-13.4841	49.8838	-0.90155	ZNF564	zinc finger protein 564
219608_s_at	6.04e-25	1.27e-26	13.4822	49.873	1.18621	FBXO38	F-box protein 38
229082_at	6.17e-25	1.3e-26	-13.4781	49.8498	-1.86379	CCDC125	coiled-coil domain containing 125
223122_s_at	6.29e-25	1.32e-26	13.4746	49.8298	5.87694	SFRP2	secreted frizzled related protein 2
200635_s_at	6.46e-25	1.36e-26	-13.47	49.8034	-2.05104	PTPRF	protein tyrosine phosphatase, receptor type F
220000_at	6.71e-25	1.41e-26	13.463	49.7639	1.04608	SIGLEC5	sialic acid binding Ig like lectin 5
218222_x_at	6.9e-25	1.45e-26	13.458	49.7353	1.05085	ARNT	aryl hydrocarbon receptor nuclear translocator
207987_s_at	7.46e-25	1.57e-26	-13.4442	49.6564	-0.787342	GNRH1	gonadotropin releasing hormone 1
201353_s_at	7.55e-25	1.59e-26	13.442	49.6439	1.15675	BAZ2A	bromodomain adjacent to zinc finger domain 2A
236254_at	7.97e-25	1.69e-26	13.4322	49.5882	1.27695	VPS13B	vacuolar protein sorting 13 homolog B
243790_at	8.12e-25	1.72e-26	-13.4283	49.5662	-1.28193	ZNF585A	zinc finger protein 585A
201950_x_at	8.31e-25	1.77e-26	13.4241	49.5422	0.749396	CAPZB	capping actin protein of muscle Z-line beta subunit
238995_at	8.46e-25	1.8e-26	-13.4209	49.5239	-0.713896	SULT1A1	sulfotransferase family 1A member 1
1564053_a_at	8.59e-25	1.83e-26	13.418	49.5075	1.62312	YTHDF3	YTH N6-methyladenosine RNA binding protein 3
244687_at	8.71e-25	1.85e-26	-13.4155	49.4932	-1.27422	DBT	dihydrolipoamide branched chain transacylase E2
202038_at	9.16e-25	1.95e-26	-13.4066	49.4427	-1.02192	UBE4A	ubiquitination factor E4A
207106_s_at	9.17e-25	1.96e-26	-13.4062	49.4405	-1.50776	LTK	leukocyte receptor tyrosine kinase
207671_s_at	9.2e-25	1.96e-26	13.4055	49.4365	0.98494	BEST1	bestrophin 1
208660_at	9.21e-25	1.97e-26	13.4051	49.4339	0.9676	CS	citrate synthase
220456_at	9.24e-25	1.98e-26	-13.4043	49.4297	-0.712731	SPTLC3	serine palmitoyltransferase long chain base subunit 3
232436_at	9.3e-25	1.99e-26	-13.403	49.4222	-1.01673	ZNF274	zinc finger protein 274
231944_at	9.72e-25	2.09e-26	-13.3948	49.3752	-3.01231	ERO1B	endoplasmic reticulum oxidoreductase 1 beta
222385_x_at	1.01e-24	2.18e-26	13.3873	49.3327	1.60999	SEC61A1	Sec61 translocon alpha 1 subunit
237885_at	1.04e-24	2.25e-26	-13.3819	49.3018	-2.5916	SOX21-AS1	SOX21 antisense RNA 1 (head to head)
217777_s_at	1.04e-24	2.24e-26	-13.3822	49.3037	-1.78728	HACD3	3-hydroxyacyl-CoA dehydratase 3
218215_s_at	1.06e-24	2.28e-26	13.3796	49.2889	1.00374	NR1H2	nuclear receptor subfamily 1 group H member 2
202687_s_at	1.07e-24	2.32e-26	-13.3766	49.2714	-2.13459	TNFSF10	tumor necrosis factor superfamily member 10
226237_at	1.07e-24	2.32e-26	13.3765	49.2708	4.76625	COL8A1	collagen type VIII alpha 1 chain
211540_s_at	1.09e-24	2.36e-26	13.3732	49.2522	1.25673	RB1	RB transcriptional corepressor 1
200947_s_at	1.13e-24	2.44e-26	-13.3675	49.2199	-1.29692	GLUD1	glutamate dehydrogenase 1
243594_x_at	1.14e-24	2.46e-26	-13.3659	49.2109	-1.90642	SPIRE2	spire type actin nucleation factor 2
201706_s_at	1.15e-24	2.5e-26	13.3631	49.1947	0.912944	PEX19	peroxisomal biogenesis factor 19
214779_s_at	1.22e-24	2.65e-26	-13.3532	49.1385	-1.553	SGSM3	small G protein signaling modulator 3
229970_at	1.23e-24	2.67e-26	-13.3519	49.1312	-1.50202	KBTBD7	kelch repeat and BTB domain containing 7
202895_s_at	1.23e-24	2.68e-26	13.3508	49.1248	1.04021	SIRPA	signal regulatory protein alpha
223875_s_at	1.25e-24	2.73e-26	-13.3482	49.1099	-0.962252	EPC1	enhancer of polycomb homolog 1
1568656_at	1.25e-24	2.74e-26	-13.3474	49.1051	-0.645065	LOC105375677	uncharacterized LOC105375677
1555754_s_at	1.25e-24	2.74e-26	13.3471	49.1037	0.665735	ATN1	atrophin 1
242935_at	1.25e-24	2.72e-26	13.3484	49.111	1.09876	SBF2	SET binding factor 2
235406_x_at	1.28e-24	2.81e-26	-13.3431	49.0808	-0.921802	TMEM161B-AS1	TMEM161B antisense RNA 1
1552719_at	1.29e-24	2.82e-26	-13.3422	49.0756	-1.04861	CASC4	cancer susceptibility candidate 4
238121_at	1.31e-24	2.88e-26	-13.3387	49.0554	-1.58025	GK5	glycerol kinase 5 (putative)
233082_at	1.32e-24	2.89e-26	-13.338	49.0515	-1.36708	ZNF630	zinc finger protein 630
202173_s_at	1.32e-24	2.9e-26	13.3375	49.0489	1.06593	VEZF1	vascular endothelial zinc finger 1
210169_at	1.34e-24	2.95e-26	-13.3344	49.0309	-1.20241	SEC14L5	SEC14 like lipid binding 5
211900_x_at	1.39e-24	3.06e-26	13.328	48.9944	1.05656	CD6	CD6 molecule
226732_at	1.42e-24	3.14e-26	-13.3235	48.9692	-0.857128	RBM33	RNA binding motif protein 33
212744_at	1.44e-24	3.18e-26	-13.3211	48.9551	-1.03004	BBS4	Bardet-Biedl syndrome 4
214149_s_at	1.51e-24	3.35e-26	-13.3121	48.9041	-1.3474	ATP6V0E1	ATPase H+ transporting V0 subunit e1
242882_at	1.52e-24	3.38e-26	13.3108	48.8966	1.45656	RNF207	ring finger protein 207
230683_at	1.53e-24	3.4e-26	-13.3095	48.889	-1.17376	PPP4R1L	protein phosphatase 4 regulatory subunit 1 like (pseudogene)
225290_at	1.55e-24	3.44e-26	-13.3074	48.877	-2.26604	ETNK1	ethanolamine kinase 1
230505_at	1.55e-24	3.45e-26	-13.3072	48.8762	-1.8906	LOC145474	uncharacterized LOC145474
207704_s_at	1.55e-24	3.44e-26	13.3073	48.8767	1.6657	GAS7	growth arrest specific 7
203335_at	1.57e-24	3.51e-26	-13.304	48.8577	-1.79175	PHYH	phytanoyl-CoA 2-hydroxylase
223191_at	1.63e-24	3.63e-26	-13.2982	48.8245	-1.16587	COX16	COX16, cytochrome c oxidase assembly homolog
228026_at	1.75e-24	3.91e-26	-13.2851	48.7498	-1.29051	SIKE1	suppressor of IKBKE 1
205750_at	1.76e-24	3.93e-26	-13.2842	48.7448	-1.13654	BPHL	biphenyl hydrolase like
224288_x_at	1.76e-24	3.94e-26	13.2839	48.7431	1.10894	FKSG49	FKSG49
204006_s_at	1.77e-24	3.96e-26	13.2829	48.7376	3.44466	FCGR3B///FCGR3A	Fc fragment of IgG receptor IIIb///Fc fragment of IgG receptor IIIa
244691_at	1.78e-24	4.01e-26	-13.2807	48.7252	-1.15643	SETD5	SET domain containing 5
209041_s_at	1.78e-24	4e-26	13.2813	48.7286	1.28618	UBE2G2	ubiquitin conjugating enzyme E2 G2
205732_s_at	1.8e-24	4.04e-26	13.2795	48.7181	1.75177	NCOA2	nuclear receptor coactivator 2
1554809_at	1.88e-24	4.23e-26	13.2716	48.6733	0.628473	LOC389199	uncharacterized LOC389199
204264_at	1.92e-24	4.34e-26	-13.2671	48.6474	-1.47831	CPT2	carnitine palmitoyltransferase 2
1558251_a_at	1.96e-24	4.43e-26	-13.2633	48.6254	-1.46643	ZNF417///ZNF587	zinc finger protein 417///zinc finger protein 587
230736_at	1.96e-24	4.44e-26	-13.2631	48.6247	-0.935163	SVIL-AS1	SVIL antisense RNA 1
211793_s_at	1.98e-24	4.48e-26	13.2614	48.6149	1.08789	ABI2	abl-interactor 2
207334_s_at	1.98e-24	4.49e-26	13.2611	48.6129	1.64393	TGFBR2	transforming growth factor beta receptor 2
239136_at	1.99e-24	4.51e-26	-13.2603	48.6088	-1.49091	UNC5B-AS1	UNC5B antisense RNA 1
210510_s_at	2.12e-24	4.81e-26	13.2492	48.5451	1.72791	NRP1	neuropilin 1
213882_at	2.15e-24	4.88e-26	-13.2466	48.5304	-1.35133	TM2D1	TM2 domain containing 1
214466_at	2.15e-24	4.87e-26	13.2467	48.5312	0.91873	GJA5	gap junction protein alpha 5
229994_at	2.15e-24	4.87e-26	13.2468	48.5316	2.62619	NFIA	nuclear factor I A
204918_s_at	2.18e-24	4.95e-26	-13.244	48.5157	-1.6315	MLLT3	MLLT3, super elongation complex subunit
232053_x_at	2.18e-24	4.96e-26	13.2437	48.5136	1.26403	RHBDD2	rhomboid domain containing 2
1554999_at	2.22e-24	5.06e-26	-13.2402	48.4937	-0.822704	RASGEF1B	RasGEF domain family member 1B
217462_at	2.27e-24	5.17e-26	-13.2365	48.473	-0.843517	MYRF	myelin regulatory factor
201182_s_at	2.32e-24	5.29e-26	-13.2324	48.4494	-0.921027	CHD4	chromodomain helicase DNA binding protein 4
209944_at	2.32e-24	5.32e-26	-13.2316	48.445	-0.594493	PTGR2///ZNF410	prostaglandin reductase 2///zinc finger protein 410
203767_s_at	2.38e-24	5.44e-26	-13.2275	48.4213	-2.44995	STS	steroid sulfatase (microsomal), isozyme S
1555359_at	2.52e-24	5.78e-26	13.217	48.3614	0.708804	PIGQ	phosphatidylinositol glycan anchor biosynthesis class Q
208994_s_at	2.53e-24	5.82e-26	-13.2158	48.3547	-0.882645	PPIG	peptidylprolyl isomerase G
1554410_a_at	2.58e-24	5.95e-26	13.212	48.3328	0.861412	RCC1L	RCC1 like
208698_s_at	2.58e-24	5.94e-26	13.2122	48.3342	1.05371	NONO	non-POU domain containing, octamer-binding
202739_s_at	2.59e-24	5.97e-26	-13.2114	48.3294	-1.36831	PHKB	phosphorylase kinase regulatory subunit beta
213359_at	2.62e-24	6.04e-26	-13.2093	48.3173	-1.50417	HNRNPD	heterogeneous nuclear ribonucleoprotein D
78383_at	2.67e-24	6.16e-26	-13.206	48.2987	-0.716903	TOPORS-AS1	TOPORS antisense RNA 1
240168_at	2.79e-24	6.45e-26	13.1978	48.2517	1.31859	XPO7	exportin 7
215918_s_at	2.8e-24	6.48e-26	13.1972	48.2484	1.53661	SPTBN1	spectrin beta, non-erythrocytic 1
207300_s_at	2.83e-24	6.54e-26	13.1956	48.2391	1.52146	F7	coagulation factor VII
1555996_s_at	2.83e-24	6.55e-26	13.1953	48.2375	1.93993	MIR1248///SNORA81///SNORA4///SNORD2///SNORA63///EIF4A2	microRNA 1248///small nucleolar RNA, H/ACA box 81///small nucleolar RNA, H/ACA box 4///small nucleolar RNA, C/D box 2///small nucleolar RNA, H/ACA box 63///eukaryotic translation initiation factor 4A2
1562053_at	2.96e-24	6.87e-26	-13.1868	48.189	-0.824788	LOC101930370	uncharacterized LOC101930370
202958_at	2.96e-24	6.87e-26	13.187	48.19	0.796683	PTPN9	protein tyrosine phosphatase, non-receptor type 9
202014_at	2.97e-24	6.9e-26	13.1861	48.1849	1.37686	PPP1R15A	protein phosphatase 1 regulatory subunit 15A
222810_s_at	3.12e-24	7.26e-26	13.1773	48.1347	1.4022	RASAL2	RAS protein activator like 2
207764_s_at	3.14e-24	7.32e-26	13.1759	48.1267	1.56388	HIPK3	homeodomain interacting protein kinase 3
239007_at	3.23e-24	7.52e-26	-13.1711	48.0994	-0.872113	ZNF616	zinc finger protein 616
218791_s_at	3.25e-24	7.58e-26	-13.1698	48.0919	-1.18316	KATNBL1	katanin regulatory subunit B1 like 1
218124_at	3.36e-24	7.86e-26	-13.1634	48.0553	-1.62374	RETSAT	retinol saturase
227626_at	3.47e-24	8.12e-26	-13.1577	48.023	-2.77934	PAQR8	progestin and adipoQ receptor family member 8
225980_at	3.62e-24	8.48e-26	-13.1502	47.9801	-1.04946	ELMSAN1	ELM2 and Myb/SANT domain containing 1
241727_x_at	3.63e-24	8.51e-26	-13.1496	47.9766	-0.958486	DHFR2	dihydrofolate reductase 2
225781_at	3.68e-24	8.63e-26	-13.1471	47.9623	-0.864919	MAPK9	mitogen-activated protein kinase 9
236591_at	3.7e-24	8.7e-26	-13.1458	47.955	-1.44902	MIR4458///MIR4458HG	microRNA 4458///MIR4458 host gene
211555_s_at	3.71e-24	8.74e-26	13.1448	47.9494	3.04216	GUCY1B3	guanylate cyclase 1 soluble subunit beta
1560587_s_at	3.84e-24	9.06e-26	-13.1387	47.9145	-1.24798	PRDX5	peroxiredoxin 5
214295_at	4.07e-24	9.61e-26	13.1284	47.8555	1.96958	KIAA0485	uncharacterized LOC57235
225795_at	4.36e-24	1.03e-25	-13.1159	47.7842	-1.03001	SMDT1	single-pass membrane protein with aspartate rich tail 1
1556336_at	4.39e-24	1.04e-25	13.1149	47.7781	1.02501	LOC101928747///RBMX///SNORD61	uncharacterized LOC101928747///RNA binding motif protein, X-linked///small nucleolar RNA, C/D box 61
208072_s_at	4.41e-24	1.04e-25	-13.1139	47.7726	-1.7141	DGKD	diacylglycerol kinase delta
222457_s_at	4.45e-24	1.06e-25	-13.1119	47.7611	-1.98968	LIMA1	LIM domain and actin binding 1
205437_at	4.54e-24	1.08e-25	-13.1082	47.7399	-1.32644	ZNF211	zinc finger protein 211
227016_at	4.54e-24	1.08e-25	-13.1083	47.7406	-1.24901	ERICH1	glutamate rich 1
1553840_a_at	4.72e-24	1.12e-25	-13.1012	47.6998	-0.547825	CCDC149	coiled-coil domain containing 149
209321_s_at	4.76e-24	1.13e-25	13.0998	47.6921	1.64985	ADCY3	adenylate cyclase 3
213552_at	5.22e-24	1.25e-25	-13.0832	47.5974	-1.66004	GLCE	glucuronic acid epimerase
226554_at	5.28e-24	1.26e-25	-13.0813	47.5864	-0.906438	ZBTB7A	zinc finger and BTB domain containing 7A
214726_x_at	5.28e-24	1.26e-25	13.0812	47.5857	1.06453	ADD1	adducin 1
228567_at	5.31e-24	1.27e-25	-13.0798	47.5779	-1.19632	GAN	gigaxonin
204563_at	5.34e-24	1.28e-25	13.0786	47.571	2.923	SELL	selectin L
202334_s_at	5.35e-24	1.28e-25	-13.0781	47.5681	-1.13528	UBE2B	ubiquitin conjugating enzyme E2 B
229909_at	5.48e-24	1.31e-25	-13.0739	47.5438	-2.27986	B4GALNT3	beta-1,4-N-acetyl-galactosaminyltransferase 3
1560550_at	5.58e-24	1.34e-25	-13.0707	47.526	-1.05672	LL22NC03-75H12.2	uncharacterized LOC101927722
205290_s_at	5.61e-24	1.35e-25	-13.0696	47.5192	-2.32828	BMP2	bone morphogenetic protein 2
234665_x_at	5.67e-24	1.36e-25	13.0677	47.5086	0.956613	HHLA3	HERV-H LTR-associating 3
221618_s_at	5.75e-24	1.38e-25	13.0649	47.4927	2.37461	TAF9B	TATA-box binding protein associated factor 9b
236360_at	5.81e-24	1.4e-25	-13.0628	47.4806	-2.96042	LINC00982	long intergenic non-protein coding RNA 982
203880_at	5.83e-24	1.41e-25	-13.0622	47.4772	-1.13083	POPDC2///COX17	popeye domain containing 2///COX17, cytochrome c oxidase copper chaperone
220926_s_at	5.95e-24	1.44e-25	-13.0583	47.4549	-2.20707	EDEM3	ER degradation enhancing alpha-mannosidase like protein 3
202970_at	5.95e-24	1.44e-25	-13.0583	47.4547	-1.40946	DYRK2	dual specificity tyrosine phosphorylation regulated kinase 2
210878_s_at	6.11e-24	1.48e-25	-13.0533	47.4261	-0.966308	KDM3B	lysine demethylase 3B
230047_at	6.18e-24	1.5e-25	-13.0512	47.414	-2.03684	ARHGAP42	Rho GTPase activating protein 42
204658_at	6.24e-24	1.51e-25	-13.0494	47.4041	-1.11296	TRA2A	transformer 2 alpha homolog
210641_at	6.36e-24	1.55e-25	-13.0455	47.3817	-4.44027	CAPN9	calpain 9
213686_at	6.36e-24	1.55e-25	-13.0457	47.3829	-1.29352	VPS13A	vacuolar protein sorting 13 homolog A
221669_s_at	6.66e-24	1.62e-25	-13.0372	47.3342	-1.03212	ACAD8	acyl-CoA dehydrogenase family member 8
223746_at	6.67e-24	1.63e-25	-13.0367	47.3314	-1.97415	STK4	serine/threonine kinase 4
202730_s_at	6.74e-24	1.64e-25	-13.0348	47.3206	-2.0422	MIR4680///PDCD4	microRNA 4680///programmed cell death 4 (neoplastic transformation inhibitor)
208809_s_at	6.8e-24	1.66e-25	-13.0333	47.3118	-1.08542	C6orf62	chromosome 6 open reading frame 62
203051_at	6.89e-24	1.69e-25	-13.0305	47.296	-0.903793	BAHD1	bromo adjacent homology domain containing 1
232181_at	7.1e-24	1.74e-25	-13.025	47.2644	-1.47204	PPARGC1B	PPARG coactivator 1 beta
202639_s_at	7.74e-24	1.9e-25	13.0097	47.1767	0.687174	RANBP3	RAN binding protein 3
209176_at	7.98e-24	1.96e-25	-13.0043	47.1457	-1.40868	SEC23IP	SEC23 interacting protein
204907_s_at	8.23e-24	2.03e-25	12.9986	47.1134	1.24092	MIR8085///BCL3	microRNA 8085///B-cell CLL/lymphoma 3
230211_at	8.28e-24	2.04e-25	-12.9973	47.1059	-1.30024	TRIP11	thyroid hormone receptor interactor 11
230172_at	8.28e-24	2.04e-25	-12.997	47.1044	-0.850062	IFI27L1	interferon alpha inducible protein 27 like 1
1552717_s_at	8.28e-24	2.04e-25	12.9972	47.1055	1.06928	CEP170P1///CEP170	centrosomal protein 170 pseudogene 1///centrosomal protein 170
209002_s_at	8.63e-24	2.13e-25	12.9897	47.0623	1.24703	CALCOCO1	calcium binding and coiled-coil domain 1
224030_s_at	8.95e-24	2.21e-25	-12.9831	47.0249	-0.814342	TCAF1	TRPM8 channel associated factor 1
235397_at	9.35e-24	2.32e-25	12.9751	46.9789	0.747352	LINC00174	long intergenic non-protein coding RNA 174
202019_s_at	1.05e-23	2.6e-25	12.9551	46.8643	1.04379	LANCL1	LanC like 1
218531_at	1.08e-23	2.68e-25	-12.9502	46.8364	-1.07265	TMEM134	transmembrane protein 134
228164_at	1.1e-23	2.74e-25	-12.9462	46.8135	-1.08925	AP4E1	adaptor related protein complex 4 epsilon 1 subunit
1552812_a_at	1.1e-23	2.74e-25	12.9463	46.814	1.08749	SENP1	SUMO1/sentrin specific peptidase 1
1558647_at	1.1e-23	2.73e-25	12.9466	46.8159	1.1974	SH3D19	SH3 domain containing 19
207172_s_at	1.1e-23	2.74e-25	12.946	46.8126	2.56749	CDH11	cadherin 11
216396_s_at	1.11e-23	2.76e-25	-12.9446	46.8041	-1.51282	EI24	EI24, autophagy associated transmembrane protein
239188_at	1.12e-23	2.79e-25	-12.9431	46.7958	-0.889152	PPP2R3C	protein phosphatase 2 regulatory subunit B''gamma
234584_s_at	1.13e-23	2.84e-25	12.94	46.7782	0.868532	ATE1	arginyltransferase 1
208835_s_at	1.14e-23	2.86e-25	-12.9386	46.7701	-1.466	LUC7L3	LUC7 like 3 pre-mRNA splicing factor
215058_at	1.16e-23	2.9e-25	-12.9361	46.7556	-1.39189	DENND5B	DENN domain containing 5B
228972_at	1.22e-23	3.07e-25	-12.9262	46.6993	-1.224	PITPNA-AS1	PITPNA antisense RNA 1
1553199_at	1.25e-23	3.13e-25	-12.9231	46.6813	-0.443782	DCAF4L2	DDB1 and CUL4 associated factor 4 like 2
214098_at	1.3e-23	3.25e-25	-12.9161	46.6413	-1.32224	KIAA1107	KIAA1107
209364_at	1.37e-23	3.46e-25	-12.9056	46.5808	-0.853397	BAD	BCL2 associated agonist of cell death
231235_at	1.37e-23	3.45e-25	12.9061	46.5839	1.35255	NKTR	natural killer cell triggering receptor
218273_s_at	1.38e-23	3.47e-25	12.9048	46.5763	1.90765	PDP1	pyruvate dehyrogenase phosphatase catalytic subunit 1
226082_s_at	1.39e-23	3.51e-25	-12.9032	46.5675	-0.977289	SCAF4	SR-related CTD associated factor 4
202075_s_at	1.4e-23	3.54e-25	12.9013	46.5564	2.65611	PLTP	phospholipid transfer protein
224572_s_at	1.42e-23	3.59e-25	12.8989	46.5425	1.15236	IRF2BP2	interferon regulatory factor 2 binding protein 2
204116_at	1.44e-23	3.66e-25	12.8959	46.5258	2.58392	IL2RG	interleukin 2 receptor subunit gamma
229706_at	1.45e-23	3.68e-25	12.8948	46.5195	1.59598	TCERG1	transcription elongation regulator 1
1557970_s_at	1.46e-23	3.7e-25	12.894	46.5147	0.884332	RPS6KA2	ribosomal protein S6 kinase A2
212193_s_at	1.54e-23	3.91e-25	12.884	46.4576	1.04329	LARP1	La ribonucleoprotein domain family member 1
224642_at	1.55e-23	3.94e-25	12.883	46.4515	1.26894	FYTTD1	forty-two-three domain containing 1
211269_s_at	1.62e-23	4.14e-25	12.8743	46.4019	1.48396	IL2RA	interleukin 2 receptor subunit alpha
202187_s_at	1.65e-23	4.2e-25	-12.8717	46.3868	-0.933993	PPP2R5A	protein phosphatase 2 regulatory subunit B'alpha
236217_at	1.67e-23	4.26e-25	-12.8694	46.3736	-1.24586	SLC31A1	solute carrier family 31 member 1
211515_s_at	1.7e-23	4.35e-25	12.8659	46.3535	0.991938	DSTYK	dual serine/threonine and tyrosine protein kinase
218813_s_at	1.73e-23	4.43e-25	12.8626	46.3347	1.47715	SH3GLB2	SH3 domain containing GRB2 like endophilin B2
211919_s_at	1.73e-23	4.43e-25	12.8624	46.3337	2.36762	CXCR4	C-X-C motif chemokine receptor 4
239193_at	1.74e-23	4.46e-25	12.8613	46.3274	1.14253	FUBP3	far upstream element binding protein 3
1557575_at	1.75e-23	4.5e-25	-12.8599	46.3195	-0.870016	STBD1	starch binding domain 1
202079_s_at	1.87e-23	4.79e-25	-12.8489	46.2564	-1.49722	TRAK1	trafficking kinesin protein 1
201401_s_at	1.89e-23	4.86e-25	12.8464	46.2421	1.28224	GRK2	G protein-coupled receptor kinase 2
211575_s_at	1.93e-23	4.98e-25	-12.8423	46.2187	-0.830379	UBE3A	ubiquitin protein ligase E3A
226695_at	1.96e-23	5.06e-25	12.8395	46.2027	3.31347	PRRX1	paired related homeobox 1
200841_s_at	2.07e-23	5.34e-25	12.8302	46.1492	1.53154	EPRS	glutamyl-prolyl-tRNA synthetase
211101_x_at	2.09e-23	5.38e-25	12.8288	46.141	0.829643	LILRA2	leukocyte immunoglobulin like receptor A2
1557370_s_at	2.09e-23	5.4e-25	12.8282	46.1379	1.18086	MYCBP2	MYC binding protein 2, E3 ubiquitin protein ligase
235045_at	2.15e-23	5.54e-25	-12.8236	46.1116	-1.03562	RBM7	RNA binding motif protein 7
1569938_at	2.17e-23	5.6e-25	-12.8219	46.1018	-0.507965	SIRT5	sirtuin 5
225370_at	2.17e-23	5.61e-25	12.8215	46.0996	0.788651	PYGO2	pygopus family PHD finger 2
221555_x_at	2.25e-23	5.81e-25	-12.8153	46.0638	-1.40681	CDC14B	cell division cycle 14B
215464_s_at	2.3e-23	5.95e-25	-12.8112	46.0401	-1.2061	P2RX5-TAX1BP3///TAX1BP3///P2RX5	P2RX5-TAX1BP3 readthrough (NMD candidate)///Tax1 binding protein 3///purinergic receptor P2X 5
239624_at	2.33e-23	6.03e-25	-12.8089	46.0269	-2.56772	LOC102724689	uncharacterized LOC102724689
235234_at	2.38e-23	6.18e-25	12.8046	46.0024	1.17255	PATL1	PAT1 homolog 1, processing body mRNA decay factor
235021_at	2.39e-23	6.22e-25	-12.8037	45.9974	-0.90309	KIAA2026	KIAA2026
1552930_at	2.44e-23	6.34e-25	-12.8002	45.9771	-1.82969	MMEL1	membrane metallo-endopeptidase-like 1
226140_s_at	2.45e-23	6.39e-25	-12.799	45.9704	-1.62462	OTUD1	OTU deubiquitinase 1
235940_at	2.46e-23	6.43e-25	-12.7979	45.9641	-1.34749	C9orf64	chromosome 9 open reading frame 64
238087_at	2.46e-23	6.43e-25	-12.7979	45.9642	-0.685568	RTCA	RNA 3'-terminal phosphate cyclase
204260_at	2.48e-23	6.46e-25	-12.797	45.9586	-4.65754	CHGB	chromogranin B
234664_at	2.52e-23	6.58e-25	12.7938	45.9406	0.958862	LOC101929819///LOC101060494///LINC01001///LINC01347///LOC388572	uncharacterized LOC101929819///uncharacterized LOC101060494///long intergenic non-protein coding RNA 1001///long intergenic non-protein coding RNA 1347///uncharacterized LOC388572
227788_at	2.63e-23	6.88e-25	12.786	45.8959	0.787541	USP13	ubiquitin specific peptidase 13 (isopeptidase T-3)
223240_at	2.67e-23	7e-25	-12.7831	45.879	-1.21351	FBXO8	F-box protein 8
221676_s_at	2.7e-23	7.08e-25	12.7811	45.8675	1.4164	CORO1C	coronin 1C
223025_s_at	2.74e-23	7.18e-25	12.7786	45.8535	1.13284	AP1M1	adaptor related protein complex 1 mu 1 subunit
228716_at	2.76e-23	7.23e-25	-12.7775	45.8471	-2.54647	THRB	thyroid hormone receptor beta
213579_s_at	2.92e-23	7.69e-25	-12.7668	45.7856	-1.75363	EP300	E1A binding protein p300
204248_at	2.99e-23	7.86e-25	-12.763	45.764	-1.47977	GNA11	G protein subunit alpha 11
221589_s_at	3.02e-23	7.95e-25	-12.761	45.7523	-1.84861	ALDH6A1	aldehyde dehydrogenase 6 family member A1
235466_s_at	3.07e-23	8.09e-25	-12.7579	45.7347	-1.5348	LOC102724017	uncharacterized LOC102724017
203442_x_at	3.18e-23	8.42e-25	12.751	45.6954	0.973021	EML3	echinoderm microtubule associated protein like 3
232591_s_at	3.35e-23	8.88e-25	12.7418	45.6422	1.51541	TMEM30A	transmembrane protein 30A
231635_x_at	3.42e-23	9.07e-25	-12.7382	45.6217	-0.755754	RNF31	ring finger protein 31
241725_at	3.47e-23	9.21e-25	12.7355	45.6061	0.625883	E2F7	E2F transcription factor 7
1566134_at	3.47e-23	9.23e-25	12.735	45.6035	0.893278	CARHSP1	calcium regulated heat stable protein 1
235668_at	3.51e-23	9.34e-25	12.733	45.5922	1.19156	PRDM1	PR/SET domain 1
228030_at	3.53e-23	9.39e-25	12.7322	45.5873	2.12667	RBM6	RNA binding motif protein 6
212507_at	3.65e-23	9.74e-25	-12.7257	45.5502	-1.01941	TMEM131	transmembrane protein 131
223003_at	3.7e-23	9.88e-25	12.7232	45.5358	0.739473	C19orf43	chromosome 19 open reading frame 43
219722_s_at	3.81e-23	1.02e-24	-12.7182	45.5071	-2.55665	GDPD3	glycerophosphodiester phosphodiesterase domain containing 3
217877_s_at	3.83e-23	1.02e-24	-12.717	45.5	-0.839967	GPBP1L1	GC-rich promoter binding protein 1 like 1
217693_x_at	3.94e-23	1.05e-24	-12.712	45.4714	-0.848386	MAGOH2P	mago homolog 2, pseudogene
1567443_x_at	4.02e-23	1.08e-24	-12.708	45.4485	-0.580928	PSEN1	presenilin 1
207290_at	4.06e-23	1.09e-24	-12.7062	45.4384	-1.46075	PLXNA2	plexin A2
211387_x_at	4.15e-23	1.12e-24	12.7018	45.4128	1.13716	RNGTT	RNA guanylyltransferase and 5'-phosphatase
211981_at	4.15e-23	1.12e-24	12.7019	45.4136	2.56698	COL4A1	collagen type IV alpha 1 chain
225346_at	4.21e-23	1.14e-24	-12.6991	45.3976	-1.44216	MTERF2	mitochondrial transcription termination factor 2
214776_x_at	4.25e-23	1.15e-24	-12.6975	45.3886	-0.59246	XYLB	xylulokinase
221529_s_at	4.28e-23	1.15e-24	12.6964	45.3818	2.06255	PLVAP	plasmalemma vesicle associated protein
234709_at	4.34e-23	1.17e-24	-12.6936	45.3662	-4.00351	CAPN13	calpain 13
214153_at	4.36e-23	1.18e-24	12.6924	45.3589	1.14238	ELOVL5	ELOVL fatty acid elongase 5
217749_at	4.63e-23	1.25e-24	-12.6818	45.2984	-1.66989	COPG1	coatomer protein complex subunit gamma 1
1562013_a_at	4.73e-23	1.28e-24	-12.6778	45.2755	-1.20276	LOC100506730	uncharacterized LOC100506730
204879_at	4.87e-23	1.32e-24	12.6728	45.2466	1.97134	PDPN	podoplanin
232158_x_at	4.92e-23	1.34e-24	-12.6709	45.2354	-1.91339	LOC101927157///NIPAL1	uncharacterized LOC101927157///NIPA like domain containing 1
227334_at	4.93e-23	1.34e-24	-12.6703	45.2323	-1.7386	USP54	ubiquitin specific peptidase 54
205798_at	5.02e-23	1.36e-24	12.6673	45.215	2.45756	IL7R	interleukin 7 receptor
232411_at	5.44e-23	1.48e-24	-12.6527	45.1314	-0.658647	KCNJ6	potassium voltage-gated channel subfamily J member 6
235952_at	5.69e-23	1.56e-24	12.6443	45.0832	1.97308	DGKH	diacylglycerol kinase eta
213393_at	5.77e-23	1.58e-24	-12.6417	45.068	-1.6698	MFSD9	major facilitator superfamily domain containing 9
209890_at	5.79e-23	1.59e-24	-12.6409	45.0636	-2.03201	TSPAN5	tetraspanin 5
201438_at	5.83e-23	1.6e-24	12.6396	45.056	2.59742	COL6A3	collagen type VI alpha 3 chain
233233_at	5.94e-23	1.63e-24	-12.6361	45.0362	-1.48648	RASSF3	Ras association domain family member 3
212523_s_at	6.07e-23	1.67e-24	-12.6322	45.0134	-0.783543	SPIDR	scaffolding protein involved in DNA repair
205464_at	6.08e-23	1.67e-24	-12.6319	45.0118	-2.20517	SCNN1B	sodium channel epithelial 1 beta subunit
229126_at	6.08e-23	1.68e-24	-12.6316	45.0104	-1.19074	TMEM19	transmembrane protein 19
203104_at	6.15e-23	1.7e-24	12.6296	44.9986	1.72835	CSF1R	colony stimulating factor 1 receptor
214857_at	6.48e-23	1.79e-24	-12.6202	44.9449	-1.26446	RPARP-AS1	RPARP antisense RNA 1
1562228_s_at	6.61e-23	1.83e-24	12.6168	44.9251	0.980927	PDE5A	phosphodiesterase 5A
201058_s_at	6.62e-23	1.83e-24	12.6164	44.9227	4.46967	MYL9	myosin light chain 9
202235_at	6.67e-23	1.84e-24	-12.6151	44.9155	-2.05479	SLC16A1	solute carrier family 16 member 1
226188_at	6.8e-23	1.88e-24	-12.6114	44.8944	-1.43929	LGALSL	galectin like
202128_at	6.86e-23	1.9e-24	-12.6097	44.8844	-1.04672	AREL1	apoptosis resistant E3 ubiquitin protein ligase 1
1557615_a_at	7.21e-23	2e-24	12.6012	44.8354	0.57599	ARHGAP19	Rho GTPase activating protein 19
219171_s_at	7.29e-23	2.02e-24	-12.5989	44.8228	-0.833998	ZNF236	zinc finger protein 236
226978_at	7.31e-23	2.03e-24	-12.5984	44.8198	-1.25741	PPARA	peroxisome proliferator activated receptor alpha
242956_at	7.35e-23	2.04e-24	-12.5974	44.8141	-1.55534	IDH1	isocitrate dehydrogenase (NADP(+)) 1, cytosolic
223712_at	7.45e-23	2.07e-24	-12.5949	44.7994	-1.31891	PCBD2	pterin-4 alpha-carbinolamine dehydratase 2
220351_at	7.73e-23	2.15e-24	-12.5885	44.7626	-3.19326	ACKR4	atypical chemokine receptor 4
207696_at	7.79e-23	2.17e-24	-12.5869	44.7534	-0.920299	FUT9	fucosyltransferase 9
205168_at	7.81e-23	2.18e-24	12.5862	44.7495	3.04138	DDR2	discoidin domain receptor tyrosine kinase 2
1559309_at	7.86e-23	2.19e-24	-12.585	44.7428	-0.726513	MCFD2	multiple coagulation factor deficiency 2
225551_at	8.02e-23	2.24e-24	-12.5814	44.722	-1.04429	CNST	consortin, connexin sorting protein
228184_at	8.03e-23	2.24e-24	-12.5811	44.7202	-1.77041	DISP1	dispatched RND transporter family member 1
241661_at	8.24e-23	2.31e-24	12.5762	44.6922	1.19677	JMJD1C	jumonji domain containing 1C
236760_at	8.67e-23	2.43e-24	-12.5672	44.6405	-1.33221	AMMECR1	Alport syndrome, mental retardation, midface hypoplasia and elliptocytosis chromosomal region gene 1
1557347_at	8.71e-23	2.44e-24	-12.5662	44.6348	-1.20923	MCPH1	microcephalin 1
204199_at	8.95e-23	2.51e-24	-12.5615	44.6075	-1.87867	RALGPS1	Ral GEF with PH domain and SH3 binding motif 1
201864_at	8.95e-23	2.51e-24	12.5613	44.6066	0.903989	GDI1	GDP dissociation inhibitor 1
1554834_a_at	8.99e-23	2.53e-24	12.5603	44.601	1.58497	RASSF5	Ras association domain family member 5
214250_at	9.03e-23	2.54e-24	12.5595	44.5962	1.4538	NUMA1	nuclear mitotic apparatus protein 1
208452_x_at	9.04e-23	2.55e-24	12.5591	44.594	0.876736	MYO9B	myosin IXB
203611_at	9.25e-23	2.61e-24	12.5548	44.5693	1.032	TERF2	telomeric repeat binding factor 2
227416_s_at	9.27e-23	2.62e-24	-12.5542	44.566	-1.06917	ZCRB1	zinc finger CCHC-type and RNA binding motif containing 1
1555913_at	9.29e-23	2.62e-24	12.5539	44.564	1.01727	GON4L	gon-4 like
206844_at	9.51e-23	2.69e-24	-12.5496	44.5392	-2.68277	FBP2	fructose-bisphosphatase 2
212640_at	9.52e-23	2.69e-24	-12.5493	44.5377	-1.41619	HACD2	3-hydroxyacyl-CoA dehydratase 2
204859_s_at	9.55e-23	2.71e-24	-12.5486	44.5335	-1.35695	APAF1	apoptotic peptidase activating factor 1
229647_at	9.59e-23	2.72e-24	-12.5478	44.529	-1.15884	NDUFS1	NADH:ubiquinone oxidoreductase core subunit S1
242857_at	9.85e-23	2.8e-24	12.543	44.5012	1.2165	FARP2	FERM, ARH/RhoGEF and pleckstrin domain protein 2
225214_at	1.01e-22	2.88e-24	-12.538	44.4729	-0.911644	LOC100129034	uncharacterized LOC100129034
1552502_s_at	1.02e-22	2.9e-24	-12.5367	44.4652	-3.2802	RHBDL2	rhomboid like 2
1566544_at	1.02e-22	2.89e-24	-12.537	44.4669	-0.477026	PPP5D1	PPP5 tetratricopeptide repeat domain containing 1
224035_s_at	1.02e-22	2.89e-24	12.537	44.4671	0.884232	BCL2L13	BCL2 like 13
230364_at	1.03e-22	2.93e-24	-12.5349	44.4552	-1.9559	CHPT1	choline phosphotransferase 1
230328_at	1.03e-22	2.92e-24	-12.5355	44.4585	-0.888407	LOC101930306///RRN3P1///RRN3P2///RRN3	uncharacterized LOC101930306///RRN3 homolog, RNA polymerase I transcription factor pseudogene 1///RRN3 homolog, RNA polymerase I transcription factor pseudogene 2///RRN3 homolog, RNA polymerase I transcription factor
201108_s_at	1.03e-22	2.94e-24	12.5344	44.4521	3.14729	THBS1	thrombospondin 1
219076_s_at	1.04e-22	2.96e-24	-12.5333	44.4457	-1.72229	PXMP2	peroxisomal membrane protein 2
210850_s_at	1.05e-22	3e-24	12.5309	44.4317	0.768386	ELK1	ELK1, ETS transcription factor
1556066_at	1.05e-22	3e-24	12.5307	44.4308	1.09081	KDM6B	lysine demethylase 6B
202248_at	1.06e-22	3.03e-24	12.5292	44.422	0.709059	E2F4	E2F transcription factor 4
204058_at	1.07e-22	3.06e-24	-12.5272	44.4105	-2.63683	ME1	malic enzyme 1
1555854_at	1.08e-22	3.08e-24	-12.5262	44.4047	-3.81217	LOC101930400///AKR1C2///AKR1C1	aldo-keto reductase family 1 member C2-like///aldo-keto reductase family 1, member C2///aldo-keto reductase family 1 member C1
227252_at	1.08e-22	3.09e-24	-12.5253	44.4	-1.17536	LRP10	LDL receptor related protein 10
212207_at	1.08e-22	3.08e-24	-12.526	44.404	-1.07122	MED13L	mediator complex subunit 13 like
205198_s_at	1.12e-22	3.22e-24	-12.5185	44.361	-1.35443	ATP7A	ATPase copper transporting alpha
201168_x_at	1.12e-22	3.21e-24	12.5189	44.3633	0.978151	ARHGDIA	Rho GDP dissociation inhibitor alpha
222727_s_at	1.14e-22	3.29e-24	12.515	44.3404	0.803461	SLC8B1	solute carrier family 8 member B1
1560679_at	1.19e-22	3.43e-24	-12.5076	44.2981	-1.54616	LINC01127	long intergenic non-protein coding RNA 1127
222604_at	1.19e-22	3.43e-24	-12.5073	44.2964	-0.930552	GTF3C3	general transcription factor IIIC subunit 3
222761_at	1.21e-22	3.49e-24	-12.5047	44.2816	-1.287	BIVM	basic, immunoglobulin-like variable motif containing
202450_s_at	1.21e-22	3.48e-24	12.5051	44.2837	2.26568	CTSK	cathepsin K
219679_s_at	1.23e-22	3.54e-24	12.502	44.2659	1.00741	WAC	WW domain containing adaptor with coiled-coil
201557_at	1.23e-22	3.56e-24	12.5012	44.2615	1.11081	VAMP2	vesicle associated membrane protein 2
201666_at	1.28e-22	3.7e-24	12.4944	44.2225	2.06202	TIMP1	TIMP metallopeptidase inhibitor 1
221122_at	1.29e-22	3.72e-24	-12.4933	44.2158	-4.85343	HRASLS2	HRAS like suppressor 2
208957_at	1.3e-22	3.76e-24	-12.4917	44.2066	-0.839139	ERP44	endoplasmic reticulum protein 44
1555948_s_at	1.31e-22	3.78e-24	-12.4907	44.201	-1.16686	FAM120A	family with sequence similarity 120A
211934_x_at	1.31e-22	3.79e-24	12.4904	44.1991	0.953856	GANAB	glucosidase II alpha subunit
227306_at	1.33e-22	3.85e-24	-12.4876	44.1834	-4.42151	ACER2	alkaline ceramidase 2
1555125_at	1.33e-22	3.87e-24	12.4864	44.1763	1.0844	PAXBP1	PAX3 and PAX7 binding protein 1
218942_at	1.34e-22	3.9e-24	-12.4854	44.1705	-1.20928	PIP4K2C	phosphatidylinositol-5-phosphate 4-kinase type 2 gamma
215905_s_at	1.36e-22	3.95e-24	-12.4832	44.1578	-1.10891	SNRNP40	small nuclear ribonucleoprotein U5 subunit 40
212900_at	1.38e-22	4e-24	-12.4808	44.1441	-1.4119	SEC24A	SEC24 homolog A, COPII coat complex component
212840_at	1.48e-22	4.33e-24	12.4673	44.0667	1.28314	UBXN7	UBX domain protein 7
239319_at	1.53e-22	4.48e-24	-12.4611	44.0312	-2.36382	LINC00992	long intergenic non-protein coding RNA 992
207524_at	1.56e-22	4.56e-24	12.458	44.0132	0.978531	MIR6132///ST7-OT3///ST7	microRNA 6132///ST7 overlapping transcript 3///suppression of tumorigenicity 7
228614_at	1.58e-22	4.64e-24	-12.4552	43.9973	-1.10494	LINC00116	long intergenic non-protein coding RNA 116
1552536_at	1.61e-22	4.72e-24	12.4522	43.9798	0.939732	VTI1A	vesicle transport through interaction with t-SNAREs 1A
225943_at	1.66e-22	4.88e-24	-12.4465	43.9471	-1.54919	NLN	neurolysin
205188_s_at	1.67e-22	4.9e-24	12.4456	43.9417	1.13326	SMAD5	SMAD family member 5
214513_s_at	1.74e-22	5.11e-24	12.4383	43.9001	1.09033	CREB1	cAMP responsive element binding protein 1
227015_at	1.75e-22	5.15e-24	-12.4373	43.894	-2.28664	ASPHD2	aspartate beta-hydroxylase domain containing 2
229782_at	1.85e-22	5.47e-24	-12.4268	43.8336	-1.88008	RMST	rhabdomyosarcoma 2 associated transcript (non-protein coding)
235371_at	1.85e-22	5.47e-24	12.4267	43.8335	3.60708	GXYLT2	glucoside xylosyltransferase 2
209352_s_at	1.87e-22	5.53e-24	12.4247	43.8219	1.23735	SIN3B	SIN3 transcription regulator family member B
206617_s_at	1.89e-22	5.58e-24	12.4233	43.8138	1.41087	RENBP	renin binding protein
238180_at	1.91e-22	5.67e-24	-12.4206	43.7982	-1.22487	LOC102724094	uncharacterized LOC102724094
240044_x_at	1.92e-22	5.71e-24	12.4193	43.7906	1.58169	TNRC6B	trinucleotide repeat containing 6B
232049_at	1.93e-22	5.73e-24	-12.4185	43.7862	-0.994798	SNX2	sorting nexin 2
231960_at	1.97e-22	5.86e-24	-12.4146	43.7639	-1.15706	BRWD1	bromodomain and WD repeat domain containing 1
225332_at	2.01e-22	5.99e-24	-12.4111	43.7435	-1.43256	OIP5-AS1	OIP5 antisense RNA 1
213839_at	2.06e-22	6.13e-24	-12.4071	43.7205	-1.74895	CLMN	calmin
205304_s_at	2.11e-22	6.3e-24	12.4023	43.693	2.412	KCNJ8	potassium voltage-gated channel subfamily J member 8
211441_x_at	2.15e-22	6.44e-24	-12.3985	43.6711	-1.43899	CYP3A43	cytochrome P450 family 3 subfamily A member 43
1559044_at	2.15e-22	6.43e-24	-12.3987	43.6722	-1.01749	EXOSC1	exosome component 1
218468_s_at	2.16e-22	6.48e-24	12.3975	43.6651	4.58028	GREM1	gremlin 1, DAN family BMP antagonist
216074_x_at	2.18e-22	6.54e-24	-12.3956	43.6546	-1.66772	WWC1	WW and C2 domain containing 1
1558338_at	2.18e-22	6.53e-24	-12.3959	43.6561	-0.762123	SEMA6A	semaphorin 6A
227717_at	2.19e-22	6.56e-24	-12.3951	43.6516	-2.07614	ARHGEF37	Rho guanine nucleotide exchange factor 37
202880_s_at	2.21e-22	6.63e-24	-12.3935	43.6422	-1.09011	CYTH1	cytohesin 1
229342_at	2.22e-22	6.66e-24	-12.3926	43.6373	-0.974687	NCBP3	nuclear cap binding subunit 3
228142_at	2.24e-22	6.74e-24	-12.3904	43.6246	-1.08536	UQCR10	ubiquinol-cytochrome c reductase, complex III subunit X
219163_at	2.24e-22	6.74e-24	-12.3907	43.626	-1.00328	ZNF562	zinc finger protein 562
202574_s_at	2.3e-22	6.94e-24	-12.3856	43.5969	-0.727116	CSNK1G2	casein kinase 1 gamma 2
232914_s_at	2.31e-22	6.95e-24	-12.3851	43.5941	-2.2435	SYTL2	synaptotagmin like 2
232216_at	2.34e-22	7.06e-24	12.3825	43.5791	1.43987	YME1L1	YME1 like 1 ATPase
50314_i_at	2.43e-22	7.35e-24	12.3754	43.5385	1.66265	C20orf27	chromosome 20 open reading frame 27
225262_at	2.47e-22	7.47e-24	-12.3727	43.5225	-1.31	FOSL2	FOS like 2, AP-1 transcription factor subunit
202046_s_at	2.51e-22	7.61e-24	12.3695	43.5046	0.790234	ARHGAP35	Rho GTPase activating protein 35
225175_s_at	2.55e-22	7.75e-24	-12.3664	43.4866	-1.55834	SLC44A2	solute carrier family 44 member 2
225650_at	2.59e-22	7.85e-24	12.3641	43.473	1.10704	SAMD1	sterile alpha motif domain containing 1
214835_s_at	2.6e-22	7.91e-24	-12.3629	43.4663	-1.67622	SUCLG2	succinate-CoA ligase GDP-forming beta subunit
243260_x_at	2.69e-22	8.17e-24	-12.3571	43.4333	-1.2091	XKR6	XK related 6
208916_at	2.69e-22	8.2e-24	12.3567	43.4306	1.25172	SLC1A5	solute carrier family 1 member 5
241405_at	2.78e-22	8.46e-24	-12.3512	43.3994	-0.625905	TOB1-AS1	TOB1 antisense RNA 1
64899_at	2.78e-22	8.46e-24	12.3512	43.399	0.868317	PLPPR2	phospholipid phosphatase related 2
227396_at	2.79e-22	8.5e-24	-12.3503	43.3941	-1.37329	PTPRJ	protein tyrosine phosphatase, receptor type J
223488_s_at	2.84e-22	8.67e-24	12.347	43.3747	1.29917	GNB4	G protein subunit beta 4
215109_at	2.86e-22	8.73e-24	-12.3457	43.3674	-0.83509	RC3H1	ring finger and CCCH-type domains 1
1569323_at	2.87e-22	8.78e-24	12.3448	43.3621	1.67973	PTPRG	protein tyrosine phosphatase, receptor type G
225129_at	2.91e-22	8.92e-24	12.3421	43.347	1.64541	CPNE2	copine 2
1555830_s_at	3e-22	9.21e-24	12.3366	43.315	1.51519	ESYT2	extended synaptotagmin 2
219735_s_at	3.07e-22	9.43e-24	-12.3323	43.2907	-2.35815	TFCP2L1	transcription factor CP2-like 1
1570266_x_at	3.11e-22	9.57e-24	12.3298	43.2763	0.796784	ERVH-1	endogenous retrovirus group H member 1
1554411_at	3.13e-22	9.62e-24	-12.3289	43.271	-2.31491	CTNNB1	catenin beta 1
1557014_a_at	3.3e-22	1.01e-23	-12.3198	43.2183	-1.42659	FAM201A	family with sequence similarity 201 member A
229173_at	3.33e-22	1.03e-23	-12.318	43.2081	-1.37605	LNPK	lunapark, ER junction formation factor
206084_at	3.37e-22	1.04e-23	-12.316	43.1964	-2.80144	PTPRR	protein tyrosine phosphatase, receptor type R
227932_at	3.42e-22	1.06e-23	-12.3128	43.1784	-1.18282	ARIH2	ariadne RBR E3 ubiquitin protein ligase 2
220546_at	3.42e-22	1.05e-23	-12.3132	43.1803	-0.981405	LOC101929115///KMT2A	uncharacterized LOC101929115///lysine methyltransferase 2A
202201_at	3.54e-22	1.09e-23	-12.3066	43.1428	-1.42209	BLVRB	biliverdin reductase B
1563947_a_at	3.58e-22	1.11e-23	-12.3046	43.1311	-1.31261	ERC1	ELKS/RAB6-interacting/CAST family member 1
225397_at	3.64e-22	1.13e-23	-12.3017	43.1145	-0.779335	C15orf57	chromosome 15 open reading frame 57
232175_at	3.69e-22	1.14e-23	-12.2992	43.0998	-0.791869	ARF1	ADP ribosylation factor 1
209062_x_at	3.69e-22	1.14e-23	12.2992	43.0999	1.10368	NCOA3	nuclear receptor coactivator 3
202497_x_at	3.69e-22	1.15e-23	12.2988	43.0979	1.97444	SLC2A3	solute carrier family 2 member 3
219482_at	3.7e-22	1.15e-23	-12.2983	43.0946	-0.981849	SETD4	SET domain containing 4
230404_at	3.71e-22	1.15e-23	-12.2978	43.0918	-1.62581	C5orf63	chromosome 5 open reading frame 63
239382_at	3.73e-22	1.16e-23	-12.2967	43.0854	-1.04527	HPS1	HPS1, biogenesis of lysosomal organelles complex 3 subunit 1
204075_s_at	3.82e-22	1.19e-23	-12.2926	43.062	-1.19782	CEP104	centrosomal protein 104
1552274_at	3.88e-22	1.21e-23	12.2897	43.0451	1.30423	PXK	PX domain containing serine/threonine kinase like
227379_at	3.89e-22	1.21e-23	-12.289	43.0415	-1.93721	MBOAT1	membrane bound O-acyltransferase domain containing 1
221778_at	3.89e-22	1.21e-23	-12.289	43.0412	-1.30738	KDM7A	lysine demethylase 7A
240258_at	3.89e-22	1.21e-23	12.289	43.0413	1.0142	ENO1	enolase 1
209629_s_at	3.9e-22	1.22e-23	12.2885	43.0387	1.69517	NXT2	nuclear transport factor 2 like export factor 2
219755_at	3.92e-22	1.22e-23	12.2875	43.0328	0.864212	CBX8	chromobox 8
1559469_s_at	3.99e-22	1.25e-23	12.2841	43.0133	0.889775	SIPA1L2	signal induced proliferation associated 1 like 2
1557078_at	4e-22	1.25e-23	12.2836	43.0101	1.95169	SLFN5	schlafen family member 5
1563776_at	4.04e-22	1.27e-23	-12.2815	42.9984	-0.840167	LOC100507283	uncharacterized LOC100507283
213082_s_at	4.05e-22	1.27e-23	-12.2811	42.9958	-1.63866	SLC35D2	solute carrier family 35 member D2
208138_at	4.07e-22	1.27e-23	-12.2804	42.9918	-5.45189	GAST	gastrin
236118_at	4.18e-22	1.31e-23	-12.2756	42.964	-2.91683	GATA6-AS1	GATA6 antisense RNA 1 (head to head)
203096_s_at	4.2e-22	1.32e-23	12.2744	42.9576	1.33992	RAPGEF2	Rap guanine nucleotide exchange factor 2
201036_s_at	4.3e-22	1.35e-23	-12.2701	42.9329	-1.35371	HADH	hydroxyacyl-CoA dehydrogenase
203844_at	4.44e-22	1.4e-23	-12.2647	42.9013	-0.41636	VHL	von Hippel-Lindau tumor suppressor
1558654_at	4.48e-22	1.41e-23	-12.2629	42.8911	-0.632212	PPM1H	protein phosphatase, Mg2+/Mn2+ dependent 1H
210998_s_at	4.56e-22	1.43e-23	12.26	42.8742	0.988485	HGF	hepatocyte growth factor
229334_at	4.68e-22	1.47e-23	12.2551	42.8464	1.48927	RUFY3	RUN and FYVE domain containing 3
1563687_a_at	4.76e-22	1.5e-23	12.2518	42.8272	1.05953	FRYL	FRY like transcription coactivator
243198_at	5.1e-22	1.61e-23	-12.2395	42.7564	-1.91113	TEX9	testis expressed 9
223356_s_at	5.12e-22	1.62e-23	-12.2388	42.7526	-0.973253	MTIF3	mitochondrial translational initiation factor 3
219066_at	5.22e-22	1.65e-23	-12.2352	42.7318	-1.20116	PPCDC	phosphopantothenoylcysteine decarboxylase
235373_at	5.26e-22	1.67e-23	-12.2338	42.724	-1.36228	LOC100506314	uncharacterized LOC100506314
204789_at	5.33e-22	1.69e-23	12.2311	42.7082	1.06854	FMNL1	formin like 1
214665_s_at	5.34e-22	1.7e-23	-12.2309	42.707	-1.30084	CHP1	calcineurin like EF-hand protein 1
243539_at	5.55e-22	1.77e-23	-12.2239	42.6666	-1.32721	KIAA1841	KIAA1841
217509_x_at	5.56e-22	1.77e-23	12.2232	42.663	0.802479	GRIK5	glutamate ionotropic receptor kainate type subunit 5
209059_s_at	5.65e-22	1.8e-23	-12.2206	42.6476	-0.831253	EDF1	endothelial differentiation related factor 1
1558369_at	5.73e-22	1.83e-23	-12.2178	42.6316	-1.5038	MPHOSPH9	M-phase phosphoprotein 9
1552851_at	5.74e-22	1.83e-23	-12.2174	42.6294	-1.71641	ZSCAN4	zinc finger and SCAN domain containing 4
205312_at	6.22e-22	1.99e-23	12.2034	42.5486	1.40257	SPI1	Spi-1 proto-oncogene
227001_at	6.24e-22	2e-23	-12.2028	42.5451	-1.42819	NIPAL2	NIPA like domain containing 2
230113_at	6.35e-22	2.03e-23	-12.1995	42.5263	-0.825352	MBNL3	muscleblind like splicing regulator 3
224436_s_at	6.54e-22	2.09e-23	-12.1945	42.4977	-1.42732	NIPSNAP3A	nipsnap homolog 3A
228450_at	6.55e-22	2.1e-23	-12.194	42.4946	-1.54711	PLEKHA7	pleckstrin homology domain containing A7
230164_at	6.67e-22	2.14e-23	12.1908	42.4761	0.890336	ZNF621	zinc finger protein 621
204764_at	6.81e-22	2.18e-23	12.1872	42.4553	0.722203	CHURC1-FNTB///FNTB	CHURC1-FNTB readthrough///farnesyltransferase, CAAX box, beta
225766_s_at	7.08e-22	2.27e-23	-12.1802	42.4151	-1.47571	TNPO1	transportin 1
201149_s_at	7.08e-22	2.27e-23	12.1804	42.4164	2.49719	TIMP3	TIMP metallopeptidase inhibitor 3
217144_at	7.23e-22	2.33e-23	-12.1763	42.3927	-0.888598	UBBP1	ubiquitin B pseudogene 1
224659_at	7.3e-22	2.35e-23	12.1745	42.3822	1.11183	SEPN1	selenoprotein N, 1
202960_s_at	7.31e-22	2.35e-23	-12.1742	42.3806	-1.25428	MUT	methylmalonyl-CoA mutase
206926_s_at	7.46e-22	2.41e-23	12.1702	42.3579	0.712939	IL11	interleukin 11
202403_s_at	7.53e-22	2.43e-23	12.1686	42.3484	2.20252	COL1A2	collagen type I alpha 2 chain
218900_at	7.55e-22	2.44e-23	-12.1679	42.3444	-1.5473	CNNM4	cyclin and CBS domain divalent metal cation transport mediator 4
212003_at	7.71e-22	2.5e-23	12.164	42.3217	0.888906	SZRD1	SUZ RNA binding domain containing 1
238773_at	7.73e-22	2.51e-23	-12.1633	42.3179	-0.984409	METTL15	methyltransferase like 15
206867_at	7.86e-22	2.55e-23	-12.1605	42.3017	-1.42467	GCKR	glucokinase (hexokinase 4) regulator
1554414_a_at	8.03e-22	2.61e-23	12.1565	42.2788	1.33043	OSGIN2	oxidative stress induced growth inhibitor family member 2
209300_s_at	8.1e-22	2.63e-23	-12.1548	42.2689	-1.04058	NECAP1	NECAP endocytosis associated 1
232473_at	8.24e-22	2.68e-23	-12.1516	42.2508	-1.19575	LOC101928524	uncharacterized LOC101928524
203253_s_at	8.29e-22	2.7e-23	-12.1506	42.2447	-1.42412	PPIP5K2	diphosphoinositol pentakisphosphate kinase 2
217891_at	8.36e-22	2.72e-23	12.1491	42.2359	1.08155	C16orf58	chromosome 16 open reading frame 58
220145_at	8.38e-22	2.73e-23	-12.1486	42.2332	-1.70915	MAP9	microtubule associated protein 9
227111_at	8.49e-22	2.77e-23	-12.146	42.2181	-1.11308	ZBTB34	zinc finger and BTB domain containing 34
211733_x_at	8.5e-22	2.78e-23	-12.1457	42.2168	-1.29829	SCP2	sterol carrier protein 2
1554003_at	8.74e-22	2.86e-23	-12.1405	42.1865	-1.39821	ARHGEF28	Rho guanine nucleotide exchange factor 28
242442_x_at	8.81e-22	2.89e-23	-12.1388	42.1771	-1.2882	TRMT10A	tRNA methyltransferase 10A
1552360_a_at	9.1e-22	2.98e-23	-12.1333	42.1452	-0.857407	TIRAP	TIR domain containing adaptor protein
204266_s_at	9.16e-22	3.01e-23	-12.1319	42.1372	-1.30253	CHKA	choline kinase alpha
65438_at	9.24e-22	3.03e-23	-12.1304	42.1283	-0.914175	TLDC1	TBC/LysM-associated domain containing 1
211000_s_at	9.26e-22	3.04e-23	12.1299	42.1256	1.4727	IL6ST	interleukin 6 signal transducer
1552295_a_at	9.28e-22	3.05e-23	12.1294	42.1228	1.11065	SLC39A13	solute carrier family 39 member 13
1564637_a_at	9.35e-22	3.07e-23	-12.1281	42.1154	-1.07902	FAM98B	family with sequence similarity 98 member B
231071_at	9.38e-22	3.09e-23	-12.1274	42.1111	-0.796444	YTHDF3-AS1	YTHDF3 antisense RNA 1 (head to head)
205017_s_at	9.45e-22	3.11e-23	12.1259	42.1025	1.32617	MBNL2	muscleblind like splicing regulator 2
206002_at	9.74e-22	3.21e-23	-12.1205	42.0716	-3.92553	ADGRG2	adhesion G protein-coupled receptor G2
1562697_at	9.81e-22	3.24e-23	-12.1192	42.0639	-1.00409	LOC339988	uncharacterized LOC339988
1554084_a_at	9.82e-22	3.24e-23	12.1189	42.0625	0.64394	NOL9	nucleolar protein 9
1555618_s_at	1e-21	3.31e-23	12.1152	42.041	0.964559	SAE1	SUMO1 activating enzyme subunit 1
227897_at	1e-21	3.32e-23	12.1151	42.0402	1.38509	RAP2B	RAP2B, member of RAS oncogene family
224576_at	1.01e-21	3.35e-23	-12.1132	42.0297	-1.2324	ERGIC1	endoplasmic reticulum-golgi intermediate compartment 1
212856_at	1.03e-21	3.41e-23	-12.1104	42.0132	-1.2599	GRAMD4	GRAM domain containing 4
213771_at	1.04e-21	3.46e-23	12.1075	41.9968	1.00422	IRF2BP1	interferon regulatory factor 2 binding protein 1
215273_s_at	1.07e-21	3.54e-23	12.1035	41.9736	0.805061	TADA3	transcriptional adaptor 3
228528_at	1.09e-21	3.6e-23	-12.1006	41.9569	-2.33415	MIR29C///MIR29B2	microRNA 29c///microRNA 29b-2
1570585_at	1.1e-21	3.66e-23	-12.0978	41.9411	-1.08913	MPZL3	myelin protein zero like 3
232412_at	1.11e-21	3.68e-23	12.0972	41.9373	1.66591	FBXL20	F-box and leucine rich repeat protein 20
226298_at	1.13e-21	3.77e-23	-12.0929	41.9124	-0.991128	RUNDC1	RUN domain containing 1
205249_at	1.18e-21	3.93e-23	12.0855	41.8699	2.49471	EGR2	early growth response 2
244771_at	1.22e-21	4.08e-23	-12.0794	41.8348	-2.28504	KBTBD12	kelch repeat and BTB domain containing 12
205979_at	1.32e-21	4.4e-23	-12.0663	41.7595	-5.27511	SCGB2A1	secretoglobin family 2A member 1
230408_at	1.32e-21	4.42e-23	-12.0655	41.755	-0.917349	PCGF3	polycomb group ring finger 3
203973_s_at	1.34e-21	4.47e-23	12.0635	41.7433	1.34013	CEBPD	CCAAT/enhancer binding protein delta
209154_at	1.35e-21	4.5e-23	-12.0621	41.7353	-1.11851	P2RX5-TAX1BP3///TAX1BP3	P2RX5-TAX1BP3 readthrough (NMD candidate)///Tax1 binding protein 3
207124_s_at	1.35e-21	4.53e-23	12.0611	41.7296	1.37919	GNB5	G protein subunit beta 5
211336_x_at	1.35e-21	4.54e-23	12.0607	41.7273	1.4111	LILRB1	leukocyte immunoglobulin like receptor B1
49306_at	1.35e-21	4.53e-23	12.0612	41.7297	1.66934	RASSF4	Ras association domain family member 4
203083_at	1.35e-21	4.5e-23	12.0621	41.7354	3.78591	THBS2	thrombospondin 2
203792_x_at	1.39e-21	4.67e-23	12.0557	41.6983	1.08308	PCGF2	polycomb group ring finger 2
204777_s_at	1.42e-21	4.77e-23	-12.0524	41.6792	-3.21816	MAL	mal, T-cell differentiation protein
239034_at	1.42e-21	4.79e-23	-12.0514	41.6736	-1.09945	LINC01560	long intergenic non-protein coding RNA 1560
222638_s_at	1.42e-21	4.77e-23	-12.0523	41.6785	-0.686957	TMEM242	transmembrane protein 242
217282_at	1.44e-21	4.87e-23	-12.0488	41.6584	-0.646412	MAN1A2	mannosidase alpha class 1A member 2
214545_s_at	1.46e-21	4.91e-23	-12.0472	41.6493	-1.30198	PROSC	proline synthetase cotranscribed homolog (bacterial)
1568605_at	1.46e-21	4.93e-23	-12.0464	41.6446	-0.970536	JRK	Jrk helix-turn-helix protein
236264_at	1.47e-21	4.98e-23	-12.0449	41.6363	-1.62996	ADGRL3	adhesion G protein-coupled receptor L3
1554804_a_at	1.47e-21	4.98e-23	12.0447	41.6352	0.670285	CLDN19	claudin 19
77508_r_at	1.53e-21	5.16e-23	12.0385	41.5992	0.688558	RABEP2	rabaptin, RAB GTPase binding effector protein 2
211719_x_at	1.53e-21	5.18e-23	12.0381	41.5971	3.08979	FN1	fibronectin 1
213172_at	1.56e-21	5.3e-23	-12.0341	41.5739	-1.3291	TTC9	tetratricopeptide repeat domain 9
239377_at	1.6e-21	5.41e-23	-12.0305	41.5533	-0.871513	EIF1AD	eukaryotic translation initiation factor 1A domain containing
214422_at	1.61e-21	5.46e-23	12.0288	41.5434	1.3996	RAD23B	RAD23 homolog B, nucleotide excision repair protein
229276_at	1.68e-21	5.71e-23	-12.0213	41.5001	-2.43722	IGSF9	immunoglobulin superfamily member 9
219313_at	1.77e-21	6.03e-23	-12.0118	41.4456	-2.54942	GRAMD1C	GRAM domain containing 1C
215954_s_at	1.77e-21	6.04e-23	12.0113	41.4427	0.839094	CACTIN	cactin, spliceosome C complex subunit
231865_at	1.77e-21	6e-23	12.0125	41.4495	1.04034	NCKAP5L	NCK associated protein 5 like
244267_at	1.81e-21	6.17e-23	12.0077	41.4217	2.08928	SATB1	SATB homeobox 1
211299_s_at	1.85e-21	6.29e-23	12.0044	41.4026	1.03731	FLOT2	flotillin 2
223457_at	1.88e-21	6.4e-23	-12.0015	41.3862	-1.42509	COPG2	coatomer protein complex subunit gamma 2
212881_at	1.89e-21	6.46e-23	-11.9999	41.377	-0.836684	PIAS4	protein inhibitor of activated STAT 4
214693_x_at	1.89e-21	6.47e-23	11.9996	41.3751	1.38276	NBPF26///NBPF10///NBPF9///NBPF14	neuroblastoma breakpoint family member 26///neuroblastoma breakpoint family member 10///neuroblastoma breakpoint family member 9///neuroblastoma breakpoint family member 14
218051_s_at	1.89e-21	6.47e-23	11.9994	41.3743	1.88093	NT5DC2	5'-nucleotidase domain containing 2
204349_at	1.9e-21	6.48e-23	-11.9993	41.3731	-1.04869	MED7	mediator complex subunit 7
226831_at	1.92e-21	6.56e-23	-11.9973	41.3619	-1.25932	SLC25A46	solute carrier family 25 member 46
218737_at	1.92e-21	6.56e-23	-11.9973	41.3617	-1.23767	SBNO1	strawberry notch homolog 1
221942_s_at	1.93e-21	6.63e-23	11.9954	41.351	3.17824	GUCY1A3	guanylate cyclase 1 soluble subunit alpha
234039_at	1.94e-21	6.65e-23	11.9948	41.3473	0.836528	TANC1	tetratricopeptide repeat, ankyrin repeat and coiled-coil containing 1
218260_at	1.95e-21	6.68e-23	11.994	41.3431	1.08262	DDA1	DET1 and DDB1 associated 1
209221_s_at	1.97e-21	6.75e-23	-11.9923	41.3329	-1.05347	OSBPL2	oxysterol binding protein like 2
217349_s_at	1.98e-21	6.8e-23	11.991	41.3257	0.896202	PRICKLE3	prickle planar cell polarity protein 3
221672_s_at	1.99e-21	6.85e-23	-11.9898	41.3188	-0.782936	TRAPPC9	trafficking protein particle complex 9
210219_at	2.01e-21	6.93e-23	-11.9877	41.3068	-0.894765	SP100	SP100 nuclear antigen
212382_at	2.01e-21	6.93e-23	11.9878	41.3073	1.92249	TCF4	transcription factor 4
217756_x_at	2.05e-21	7.05e-23	-11.9848	41.2896	-0.505311	MIR1282///HYPK///SERF2	microRNA 1282///huntingtin interacting protein K///small EDRK-rich factor 2
233040_at	2.06e-21	7.11e-23	-11.9834	41.2816	-0.911754	PLEKHA5	pleckstrin homology domain containing A5
227693_at	2.1e-21	7.25e-23	-11.9799	41.2618	-0.941938	WDR20	WD repeat domain 20
216855_s_at	2.1e-21	7.23e-23	11.9803	41.264	1.05524	HNRNPU	heterogeneous nuclear ribonucleoprotein U
227375_at	2.15e-21	7.44e-23	-11.9755	41.2362	-1.19751	ANKRD13C	ankyrin repeat domain 13C
222566_at	2.2e-21	7.59e-23	-11.9719	41.2157	-1.06641	KMT5B	lysine methyltransferase 5B
203169_at	2.25e-21	7.8e-23	-11.9673	41.1891	-0.848693	RGP1	RGP1 homolog, RAB6A GEF complex partner 1
226170_at	2.27e-21	7.85e-23	-11.9662	41.1828	-0.665651	EYA3	EYA transcriptional coactivator and phosphatase 3
1553488_at	2.36e-21	8.2e-23	-11.9586	41.1387	-0.749735	TEKT5	tektin 5
225221_at	2.37e-21	8.22e-23	-11.9583	41.1372	-1.48932	ZKSCAN1	zinc finger with KRAB and SCAN domains 1
226844_at	2.39e-21	8.29e-23	-11.9567	41.1278	-1.69816	MOB3B	MOB kinase activator 3B
208089_s_at	2.4e-21	8.34e-23	-11.9557	41.122	-1.11924	TDRD3	tudor domain containing 3
224794_s_at	2.44e-21	8.51e-23	11.9523	41.1028	1.82643	CERCAM	cerebral endothelial cell adhesion molecule
1555608_at	2.47e-21	8.62e-23	11.95	41.0893	0.708015	CAPRIN2	caprin family member 2
214585_s_at	2.51e-21	8.75e-23	11.9475	41.0749	0.607788	VPS52	VPS52, GARP complex subunit
208679_s_at	2.57e-21	8.98e-23	-11.9431	41.0493	-0.768674	ARPC2	actin related protein 2/3 complex subunit 2
212087_s_at	2.57e-21	8.95e-23	11.9435	41.0518	1.06835	ERAL1	Era like 12S mitochondrial rRNA chaperone 1
242523_at	2.6e-21	9.07e-23	-11.9412	41.0384	-1.37806	LINC00938	long intergenic non-protein coding RNA 938
225681_at	2.6e-21	9.1e-23	11.9406	41.0354	3.51622	CTHRC1	collagen triple helix repeat containing 1
225726_s_at	2.61e-21	9.14e-23	-11.94	41.0317	-2.36095	PLEKHH1	pleckstrin homology, MyTH4 and FERM domain containing H1
200864_s_at	2.68e-21	9.4e-23	-11.9351	41.0037	-1.3692	RAB11A	RAB11A, member RAS oncogene family
201454_s_at	2.68e-21	9.4e-23	-11.9351	41.0035	-0.86124	NPEPPS	aminopeptidase puromycin sensitive
210528_at	2.69e-21	9.41e-23	-11.9349	41.0021	-1.24516	MR1	major histocompatibility complex, class I-related
243519_at	2.71e-21	9.49e-23	11.9334	40.9938	0.872057	UBE3C	ubiquitin protein ligase E3C
209955_s_at	2.73e-21	9.58e-23	11.9318	40.9843	3.28414	FAP	fibroblast activation protein alpha
226576_at	2.83e-21	9.95e-23	-11.9253	40.9469	-1.68068	ARHGAP26	Rho GTPase activating protein 26
230285_at	2.84e-21	1e-22	-11.9243	40.9415	-2.20914	SVIP	small VCP interacting protein
229453_at	2.91e-21	1.03e-22	-11.9199	40.9161	-1.78612	PDIA3	protein disulfide isomerase family A member 3
216347_s_at	2.95e-21	1.04e-22	-11.9174	40.9014	-1.01273	PPP1R13B	protein phosphatase 1 regulatory subunit 13B
213462_at	2.99e-21	1.05e-22	-11.9152	40.8888	-1.48806	NPAS2	neuronal PAS domain protein 2
238456_at	3e-21	1.06e-22	-11.9144	40.8842	-0.965893	LOC100289230	uncharacterized LOC100289230
215521_at	3.02e-21	1.07e-22	11.913	40.8763	1.08767	PHC3	polyhomeotic homolog 3
1563182_at	3.04e-21	1.07e-22	-11.9122	40.8714	-1.34474	ACVR1C	activin A receptor type 1C
223615_at	3.07e-21	1.09e-22	11.9099	40.8582	0.928328	ABI3	ABI family member 3
1559190_s_at	3.09e-21	1.09e-22	-11.9088	40.8516	-2.14671	RDH13	retinol dehydrogenase 13
218840_s_at	3.09e-21	1.1e-22	-11.9086	40.851	-1.14688	NADSYN1	NAD synthetase 1
238528_at	3.15e-21	1.12e-22	11.9052	40.8314	0.904319	UBR1	ubiquitin protein ligase E3 component n-recognin 1
218090_s_at	3.16e-21	1.12e-22	-11.9046	40.8275	-1.02081	WDR11	WD repeat domain 11
1568648_a_at	3.16e-21	1.12e-22	-11.9047	40.8283	-0.713863	LOC100505851	uncharacterized LOC100505851
211887_x_at	3.2e-21	1.13e-22	11.9027	40.8167	2.01521	MSR1	macrophage scavenger receptor 1
213747_at	3.22e-21	1.14e-22	11.9012	40.808	1.30055	AZIN1	antizyme inhibitor 1
219909_at	3.26e-21	1.16e-22	-11.8986	40.7932	-1.99893	MMP28	matrix metallopeptidase 28
1552798_a_at	3.28e-21	1.17e-22	11.8978	40.7884	1.45584	TLR4	toll like receptor 4
226390_at	3.35e-21	1.19e-22	-11.894	40.7667	-1.83245	STARD4	StAR related lipid transfer domain containing 4
240574_at	3.38e-21	1.21e-22	-11.8921	40.7558	-1.40492	DNAJC3-AS1	DNAJC3 antisense RNA 1 (head to head)
225019_at	3.41e-21	1.22e-22	-11.8904	40.7456	-1.08653	CAMK2D	calcium/calmodulin dependent protein kinase II delta
201119_s_at	3.45e-21	1.23e-22	-11.8882	40.7333	-0.829556	COX8A	cytochrome c oxidase subunit 8A
222762_x_at	3.46e-21	1.24e-22	-11.8879	40.7312	-0.922381	LIMD1	LIM domains containing 1
201410_at	3.47e-21	1.24e-22	-11.887	40.7264	-1.15354	PLEKHB2	pleckstrin homology domain containing B2
206543_at	3.55e-21	1.27e-22	-11.883	40.7031	-0.932288	SMARCA2	SWI/SNF related, matrix associated, actin dependent regulator of chromatin, subfamily a, member 2
213591_at	3.55e-21	1.27e-22	-11.8832	40.7045	-0.859153	ALDH7A1	aldehyde dehydrogenase 7 family member A1
226952_at	3.57e-21	1.28e-22	-11.8819	40.6971	-1.45995	EAF1	ELL associated factor 1
241985_at	3.61e-21	1.29e-22	11.8801	40.6864	0.971894	JMY	junction mediating and regulatory protein, p53 cofactor
243501_at	3.63e-21	1.3e-22	-11.8788	40.6793	-1.18655	ATP5F1	ATP synthase, H+ transporting, mitochondrial Fo complex subunit B1
226006_at	3.73e-21	1.34e-22	-11.874	40.6513	-0.897235	PET100	PET100 homolog
212354_at	3.78e-21	1.36e-22	11.8718	40.6386	3.5008	SULF1	sulfatase 1
212682_s_at	3.83e-21	1.38e-22	11.8692	40.6239	0.716246	LMF2	lipase maturation factor 2
211941_s_at	3.84e-21	1.38e-22	-11.8687	40.6208	-0.830291	PEBP1	phosphatidylethanolamine binding protein 1
203467_at	3.85e-21	1.39e-22	-11.868	40.6166	-1.12635	PMM1	phosphomannomutase 1
1560754_at	3.92e-21	1.41e-22	11.8647	40.5978	1.20481	CMTM7	CKLF like MARVEL transmembrane domain containing 7
201698_s_at	3.95e-21	1.42e-22	-11.8633	40.5898	-0.837651	GATC///SRSF9	glutamyl-tRNA amidotransferase subunit C///serine and arginine rich splicing factor 9
213795_s_at	3.96e-21	1.43e-22	11.8626	40.5858	0.907421	PTPRA	protein tyrosine phosphatase, receptor type A
228686_at	3.97e-21	1.44e-22	-11.862	40.5821	-1.57627	LOC101929964///LINC01184	uncharacterized LOC101929964///long intergenic non-protein coding RNA 1184
241356_at	4e-21	1.45e-22	-11.8606	40.5742	-1.3902	SDR42E1	short chain dehydrogenase/reductase family 42E, member 1
219460_s_at	4.08e-21	1.48e-22	-11.8572	40.5543	-0.632527	TMEM127	transmembrane protein 127
213623_at	4.08e-21	1.48e-22	11.8572	40.5546	1.24184	KIF3A	kinesin family member 3A
207178_s_at	4.09e-21	1.48e-22	-11.8566	40.5512	-2.24984	FRK	fyn related Src family tyrosine kinase
1559870_at	4.09e-21	1.48e-22	11.8569	40.5525	0.941554	LOC100129129	uncharacterized LOC100129129
238129_s_at	4.11e-21	1.49e-22	11.8556	40.5454	0.892804	FZD2	frizzled class receptor 2
207752_x_at	4.18e-21	1.52e-22	11.8524	40.5268	0.733766	PRB1	proline rich protein BstNI subfamily 1
210266_s_at	4.25e-21	1.54e-22	-11.8497	40.5114	-1.44315	TRIM33	tripartite motif containing 33
214975_s_at	4.35e-21	1.58e-22	11.8454	40.4865	1.63047	MTMR1	myotubularin related protein 1
1555907_at	4.36e-21	1.58e-22	11.8452	40.4852	1.36714	AGAP2-AS1	AGAP2 antisense RNA 1
202326_at	4.4e-21	1.6e-22	11.8434	40.475	1.12544	EHMT2	euchromatic histone lysine methyltransferase 2
209078_s_at	4.52e-21	1.65e-22	-11.8385	40.4465	-0.858347	TXN2	thioredoxin 2
237444_at	4.59e-21	1.67e-22	-11.8358	40.4312	-1.33154	KIF13A	kinesin family member 13A
221508_at	4.66e-21	1.7e-22	-11.8331	40.4157	-0.58105	TAOK3	TAO kinase 3
222486_s_at	4.66e-21	1.7e-22	11.8328	40.4137	2.89127	ADAMTS1	ADAM metallopeptidase with thrombospondin type 1 motif 1
217866_at	4.68e-21	1.71e-22	11.8321	40.4101	0.712275	CPSF7	cleavage and polyadenylation specific factor 7
203238_s_at	4.69e-21	1.71e-22	11.8316	40.4071	2.53375	NOTCH3	notch 3
217448_s_at	4.77e-21	1.74e-22	11.8285	40.389	1.07549	TOX4	TOX high mobility group box family member 4
227060_at	4.79e-21	1.75e-22	11.8275	40.3833	0.771562	RELT	RELT tumor necrosis factor receptor
215696_s_at	4.93e-21	1.81e-22	-11.8223	40.3532	-1.00972	SEC16A	SEC16 homolog A, endoplasmic reticulum export factor
222627_at	4.95e-21	1.81e-22	-11.8217	40.35	-1.18385	VPS54	VPS54, GARP complex subunit
238955_at	4.96e-21	1.82e-22	11.821	40.3458	0.713141	RFTN2	raftlin family member 2
234191_at	5.25e-21	1.93e-22	-11.8111	40.2889	-0.932246	BCL2L14	BCL2 like 14
242998_at	5.28e-21	1.94e-22	-11.8099	40.282	-2.51701	RDH12	retinol dehydrogenase 12 (all-trans/9-cis/11-cis)
235014_at	5.33e-21	1.96e-22	-11.808	40.2708	-1.41869	ILF3-AS1	ILF3 antisense RNA 1 (head to head)
225101_s_at	5.39e-21	1.99e-22	-11.806	40.2591	-1.31465	SNX14	sorting nexin 14
219405_at	5.39e-21	1.99e-22	-11.8059	40.2587	-1.03396	TRIM68	tripartite motif containing 68
225353_s_at	5.39e-21	1.99e-22	11.8058	40.2583	1.8375	C1QC	complement C1q C chain
1555808_a_at	5.4e-21	1.99e-22	11.8057	40.2575	0.827069	EXD2	exonuclease 3'-5' domain containing 2
217023_x_at	5.44e-21	2.01e-22	11.8042	40.2493	2.61456	TPSB2///TPSAB1	tryptase beta 2 (gene/pseudogene)///tryptase alpha/beta 1
222908_at	5.63e-21	2.08e-22	-11.7979	40.2125	-1.35099	PIEZO2	piezo type mechanosensitive ion channel component 2
227697_at	5.67e-21	2.09e-22	11.7968	40.2062	2.30604	SOCS3	suppressor of cytokine signaling 3
238585_at	5.69e-21	2.11e-22	11.7959	40.2009	0.83998	GTDC1	glycosyltransferase like domain containing 1
204578_at	5.77e-21	2.13e-22	-11.7935	40.1874	-0.830479	PPIP5K1	diphosphoinositol pentakisphosphate kinase 1
220028_at	5.8e-21	2.15e-22	11.7924	40.181	0.978013	ACVR2B	activin A receptor type 2B
206123_at	5.82e-21	2.16e-22	11.7918	40.1773	0.928102	LLGL1	LLGL1, scribble cell polarity complex component
215099_s_at	5.94e-21	2.2e-22	11.788	40.1554	1.04355	RXRB	retinoid X receptor beta
219332_at	6.06e-21	2.25e-22	-11.7842	40.1338	-1.20565	MICALL2	MICAL like 2
216838_at	6.16e-21	2.29e-22	11.7812	40.1162	0.789306	LINC01278	long intergenic non-protein coding RNA 1278
210252_s_at	6.49e-21	2.42e-22	-11.772	40.0631	-0.604377	MADD	MAP kinase activating death domain
1559528_at	6.61e-21	2.47e-22	-11.7686	40.0436	-0.953045	LOC100129917	uncharacterized LOC100129917
223789_s_at	6.63e-21	2.48e-22	11.7678	40.0391	1.44984	GTPBP2	GTP binding protein 2
207128_s_at	6.68e-21	2.5e-22	-11.7665	40.0318	-1.28778	ZNF223	zinc finger protein 223
220992_s_at	6.75e-21	2.52e-22	-11.7647	40.0213	-1.35809	TRMT1L	tRNA methyltransferase 1 like
223063_at	6.75e-21	2.52e-22	11.7647	40.021	1.41408	C1orf198	chromosome 1 open reading frame 198
232366_at	6.87e-21	2.57e-22	-11.7615	40.0027	-1.37149	KIAA0232	KIAA0232
65585_at	6.96e-21	2.61e-22	11.759	39.9886	1.40114	FAM86DP///FAM86B2///FAM86FP///FAM86B1///FAM86C1	family with sequence similarity 86, member D, pseudogene///family with sequence similarity 86 member B2///family with sequence similarity 86, member A pseudogene///family with sequence similarity 86 member B1///family with sequence similarity 86 member C1
232311_at	6.98e-21	2.62e-22	-11.7583	39.9845	-1.76185	B2M	beta-2-microglobulin
204636_at	7.12e-21	2.67e-22	-11.755	39.9652	-2.43502	COL17A1	collagen type XVII alpha 1 chain
222826_at	7.14e-21	2.68e-22	11.7542	39.9604	1.17129	BLOC1S6	biogenesis of lysosomal organelles complex 1 subunit 6
211825_s_at	7.14e-21	2.68e-22	11.7542	39.9609	1.59489	FLI1	Fli-1 proto-oncogene, ETS transcription factor
202917_s_at	7.2e-21	2.71e-22	11.7526	39.9518	3.51086	S100A8	S100 calcium binding protein A8
218024_at	7.23e-21	2.72e-22	-11.752	39.9479	-1.13662	MPC1	mitochondrial pyruvate carrier 1
225241_at	7.24e-21	2.72e-22	11.7516	39.9455	3.10734	CCDC80	coiled-coil domain containing 80
240449_at	7.35e-21	2.77e-22	-11.7486	39.9284	-0.992154	ZNF341	zinc finger protein 341
244453_at	7.35e-21	2.76e-22	11.7489	39.9301	0.662882	ANKRD53	ankyrin repeat domain 53
242136_x_at	7.36e-21	2.77e-22	-11.7483	39.9267	-0.933417	MGC70870	C-terminal binding protein 2 pseudogene
1552395_at	7.36e-21	2.78e-22	11.7482	39.9261	0.603716	TSSK3	testis specific serine kinase 3
238493_at	7.41e-21	2.8e-22	-11.7469	39.9189	-1.48119	ZNF506	zinc finger protein 506
238421_at	7.48e-21	2.82e-22	11.7454	39.9101	1.23483	RC3H2	ring finger and CCCH-type domains 2
214869_x_at	7.52e-21	2.84e-22	-11.7443	39.9034	-0.810054	GAPVD1	GTPase activating protein and VPS9 domains 1
219112_at	7.74e-21	2.93e-22	-11.739	39.8732	-1.51993	RAPGEF6	Rap guanine nucleotide exchange factor 6
221027_s_at	7.74e-21	2.93e-22	-11.7392	39.874	-1.16922	PLA2G12A	phospholipase A2 group XIIA
1553107_s_at	8.28e-21	3.14e-22	-11.7271	39.8046	-0.790296	C5orf24	chromosome 5 open reading frame 24
229369_at	8.44e-21	3.2e-22	-11.7235	39.7835	-3.28435	VSIG2	V-set and immunoglobulin domain containing 2
202106_at	8.44e-21	3.2e-22	-11.7237	39.7847	-0.885543	GOLGA3	golgin A3
200999_s_at	8.48e-21	3.22e-22	-11.7225	39.7779	-1.21009	CKAP4	cytoskeleton associated protein 4
207549_x_at	8.48e-21	3.22e-22	11.7227	39.779	1.58212	CD46	CD46 molecule
235765_at	8.5e-21	3.23e-22	-11.7219	39.7747	-1.04884	TLE4	transducin like enhancer of split 4
232424_at	8.71e-21	3.32e-22	-11.7176	39.7495	-2.91854	PRDM16	PR/SET domain 16
236367_at	8.73e-21	3.33e-22	11.717	39.7465	1.06429	SMG7	SMG7, nonsense mediated mRNA decay factor
205111_s_at	8.79e-21	3.35e-22	-11.7158	39.7394	-1.60822	PLCE1	phospholipase C epsilon 1
210065_s_at	8.93e-21	3.4e-22	-11.713	39.7232	-4.86861	UPK1B	uroplakin 1B
222788_s_at	9.24e-21	3.53e-22	-11.707	39.6883	-0.964791	RSBN1	round spermatid basic protein 1
200804_at	9.3e-21	3.55e-22	-11.7058	39.6816	-1.05415	TMBIM6	transmembrane BAX inhibitor motif containing 6
205701_at	9.38e-21	3.58e-22	11.7041	39.6717	0.969985	IPO8	importin 8
205238_at	9.38e-21	3.58e-22	11.7042	39.6722	1.37727	TRMT2B	tRNA methyltransferase 2 homolog B
203343_at	9.51e-21	3.64e-22	-11.7017	39.6578	-1.66016	UGDH	UDP-glucose 6-dehydrogenase
218696_at	9.63e-21	3.68e-22	-11.6994	39.6449	-1.54541	EIF2AK3	eukaryotic translation initiation factor 2 alpha kinase 3
238929_at	9.77e-21	3.74e-22	-11.6967	39.6292	-1.01523	SRSF8	serine and arginine rich splicing factor 8
243894_at	9.85e-21	3.77e-22	-11.6952	39.6207	-1.99708	SLC41A2	solute carrier family 41 member 2
212517_at	9.95e-21	3.81e-22	-11.6934	39.61	-1.41371	ATRN	attractin
209996_x_at	1e-20	3.84e-22	-11.6921	39.6025	-0.878408	PCM1	pericentriolar material 1
202850_at	1.01e-20	3.86e-22	-11.6913	39.5982	-1.46476	ABCD3	ATP binding cassette subfamily D member 3
218391_at	1.01e-20	3.88e-22	-11.6906	39.594	-0.744971	SNF8	SNF8, ESCRT-II complex subunit
233878_s_at	1.04e-20	3.99e-22	11.6854	39.5642	1.03903	XRN2	5'-3' exoribonuclease 2
223658_at	1.07e-20	4.1e-22	-11.6809	39.5382	-1.35784	KCNK6	potassium two pore domain channel subfamily K member 6
237056_at	1.08e-20	4.15e-22	-11.679	39.5272	-2.06121	INSC	inscuteable homolog (Drosophila)
1557303_at	1.09e-20	4.19e-22	-11.6772	39.5168	-0.739271	NT5C	5', 3'-nucleotidase, cytosolic
232911_at	1.11e-20	4.27e-22	-11.6739	39.4978	-0.573348	ZFP14	ZFP14 zinc finger protein
229010_at	1.11e-20	4.27e-22	11.674	39.4981	0.89048	CBL	Cbl proto-oncogene
213246_at	1.12e-20	4.31e-22	-11.6723	39.4884	-0.952879	TMEM251	transmembrane protein 251
205119_s_at	1.12e-20	4.31e-22	11.6723	39.4886	2.23707	FPR1	formyl peptide receptor 1
204007_at	1.13e-20	4.38e-22	11.6697	39.4735	2.60241	FCGR3B	Fc fragment of IgG receptor IIIb
231768_at	1.17e-20	4.51e-22	-11.6644	39.4429	-1.03567	USF1	upstream transcription factor 1
209625_at	1.17e-20	4.55e-22	-11.663	39.435	-0.919861	PIGH	phosphatidylinositol glycan anchor biosynthesis class H
205228_at	1.17e-20	4.53e-22	11.6637	39.4387	0.806339	RBMS2	RNA binding motif single stranded interacting protein 2
230395_at	1.18e-20	4.59e-22	11.6616	39.4269	1.10858	METTL9	methyltransferase like 9
239993_at	1.19e-20	4.63e-22	-11.66	39.4178	-0.672521	LOC390705	protein phosphatase 2 regulatory subunit B'', beta pseudogene
203166_at	1.2e-20	4.67e-22	-11.6583	39.4077	-1.109	CFDP1	craniofacial development protein 1
219456_s_at	1.2e-20	4.64e-22	11.6595	39.4147	1.10025	RIN3	Ras and Rab interactor 3
205222_at	1.22e-20	4.76e-22	-11.655	39.3888	-1.79749	EHHADH	enoyl-CoA, hydratase/3-hydroxyacyl CoA dehydrogenase
1554019_s_at	1.22e-20	4.75e-22	-11.6556	39.3924	-0.782002	CEP57L1	centrosomal protein 57 like 1
202922_at	1.23e-20	4.81e-22	-11.6535	39.3802	-1.15939	GCLC	glutamate-cysteine ligase catalytic subunit
221823_at	1.27e-20	4.96e-22	-11.6482	39.3494	-1.89559	C5orf30	chromosome 5 open reading frame 30
202296_s_at	1.29e-20	5.04e-22	-11.6452	39.3324	-1.13448	RER1	retention in endoplasmic reticulum sorting receptor 1
233917_s_at	1.3e-20	5.08e-22	11.6438	39.3242	1.01135	MOV10	Mov10 RISC complex RNA helicase
203468_at	1.36e-20	5.33e-22	-11.6358	39.2779	-1.02151	CDK10	cyclin dependent kinase 10
202087_s_at	1.36e-20	5.29e-22	11.6369	39.2841	1.73185	CTSL	cathepsin L
211549_s_at	1.37e-20	5.35e-22	-11.635	39.2733	-4.09389	HPGD	hydroxyprostaglandin dehydrogenase 15-(NAD)
225210_s_at	1.38e-20	5.38e-22	-11.634	39.2673	-1.12828	FAM103A1	family with sequence similarity 103 member A1
211752_s_at	1.38e-20	5.39e-22	-11.6336	39.2652	-0.973191	NDUFS7	NADH:ubiquinone oxidoreductase core subunit S7
233819_s_at	1.39e-20	5.46e-22	-11.6315	39.2531	-1.37907	LTN1	listerin E3 ubiquitin protein ligase 1
243785_at	1.39e-20	5.46e-22	-11.6314	39.2529	-0.920742	LOC100272217	uncharacterized LOC100272217
225900_at	1.42e-20	5.57e-22	-11.6282	39.2342	-1.09731	EXOC6B	exocyst complex component 6B
236819_at	1.45e-20	5.69e-22	11.6244	39.2125	0.742683	PTBP1	polypyrimidine tract binding protein 1
226983_at	1.45e-20	5.68e-22	11.6248	39.2147	0.752216	ZNF777	zinc finger protein 777
212525_s_at	1.47e-20	5.78e-22	11.6217	39.1969	1.08761	H2AFX	H2A histone family member X
213384_x_at	1.48e-20	5.81e-22	-11.6208	39.1915	-1.0692	PLCB3	phospholipase C beta 3
1554569_a_at	1.48e-20	5.8e-22	11.621	39.1926	0.844822	CELF2	CUGBP, Elav-like family member 2
223029_s_at	1.49e-20	5.87e-22	11.6192	39.182	0.688455	TRAF7	TNF receptor associated factor 7
203071_at	1.54e-20	6.07e-22	-11.6132	39.1476	-1.54873	MIR6872///SEMA3B	microRNA 6872///semaphorin 3B
215990_s_at	1.54e-20	6.06e-22	11.6136	39.1501	1.76653	BCL6	B-cell CLL/lymphoma 6
1555434_a_at	1.58e-20	6.24e-22	11.6085	39.1205	1.82052	SLC39A14	solute carrier family 39 member 14
211386_at	1.59e-20	6.29e-22	-11.6072	39.1131	-0.932119	MGC12488	uncharacterized protein MGC12488
202627_s_at	1.61e-20	6.35e-22	11.6054	39.1025	2.97089	SERPINE1	serpin family E member 1
217767_at	1.62e-20	6.38e-22	11.6045	39.0976	3.28239	C3	complement component 3
215349_at	1.63e-20	6.43e-22	-11.6034	39.0909	-0.787871	BTBD18	BTB domain containing 18
1562788_at	1.63e-20	6.47e-22	-11.6023	39.0849	-0.698182	LINC01342	long intergenic non-protein coding RNA 1342
234042_at	1.63e-20	6.44e-22	11.603	39.0891	1.23642	TAS2R45///TAS2R43	taste 2 receptor member 45///taste 2 receptor member 43
1559218_s_at	1.65e-20	6.52e-22	11.6009	39.0768	0.718545	NFYC	nuclear transcription factor Y subunit gamma
203417_at	1.66e-20	6.59e-22	11.5992	39.0667	2.60118	MFAP2	microfibrillar associated protein 2
237038_at	1.69e-20	6.69e-22	-11.5965	39.0512	-0.819881	CXCL14	C-X-C motif chemokine ligand 14
205810_s_at	1.7e-20	6.73e-22	11.5953	39.0446	0.794633	WASL	Wiskott-Aldrich syndrome like
208932_at	1.74e-20	6.89e-22	11.5913	39.0213	0.899667	PPP4C	protein phosphatase 4 catalytic subunit
218345_at	1.77e-20	7.01e-22	11.5884	39.0047	1.82132	TMEM176A	transmembrane protein 176A
200772_x_at	1.78e-20	7.06e-22	-11.5871	38.9972	-0.863666	LOC100506248///MIR1244-2///MIR1244-3///MIR1244-1///LOC728026///PTMA	prothymosin alpha///microRNA 1244-2///microRNA 1244-3///microRNA 1244-1///prothymosin alpha-like///prothymosin, alpha
209253_at	1.8e-20	7.17e-22	11.5845	38.9823	1.22302	SORBS3	sorbin and SH3 domain containing 3
228254_at	1.83e-20	7.26e-22	-11.5823	38.9695	-1.10454	STAM2	signal transducing adaptor molecule 2
218693_at	1.84e-20	7.33e-22	-11.5807	38.9603	-1.60161	TSPAN15	tetraspanin 15
208836_at	1.88e-20	7.49e-22	11.5769	38.9383	1.46951	ATP1B3	ATPase Na+/K+ transporting subunit beta 3
239629_at	1.89e-20	7.54e-22	11.5759	38.9324	1.49162	CFLAR	CASP8 and FADD like apoptosis regulator
244398_x_at	1.92e-20	7.67e-22	-11.5728	38.9148	-0.891836	ZNF684	zinc finger protein 684
213743_at	1.93e-20	7.72e-22	-11.5717	38.9084	-1.18216	CCNT2	cyclin T2
219522_at	1.95e-20	7.79e-22	11.5703	38.9003	1.49623	FJX1	four jointed box 1
230091_at	1.97e-20	7.89e-22	-11.5681	38.8875	-1.06073	SRPK2	SRSF protein kinase 2
235231_at	1.99e-20	7.95e-22	-11.5668	38.8799	-1.32695	ZNF789	zinc finger protein 789
207509_s_at	1.99e-20	7.96e-22	11.5666	38.8787	1.69761	LAIR2	leukocyte associated immunoglobulin like receptor 2
226589_at	2.01e-20	8.07e-22	11.5642	38.8649	0.954767	TMEM192	transmembrane protein 192
208033_s_at	2.01e-20	8.04e-22	11.5648	38.8684	1.6556	ZFHX3	zinc finger homeobox 3
224672_x_at	2.02e-20	8.11e-22	-11.5632	38.8594	-0.515652	MESDC2	mesoderm development candidate 2
212595_s_at	2.02e-20	8.1e-22	11.5635	38.8613	0.860054	DAZAP2	DAZ associated protein 2
227599_at	2.03e-20	8.16e-22	-11.5621	38.853	-1.14626	MB21D2	Mab-21 domain containing 2
209946_at	2.04e-20	8.21e-22	11.5611	38.8474	2.05947	VEGFC	vascular endothelial growth factor C
1555559_s_at	2.11e-20	8.5e-22	11.5551	38.8124	0.846635	USP25	ubiquitin specific peptidase 25
62987_r_at	2.12e-20	8.53e-22	11.5545	38.8091	0.677466	CACNG4	calcium voltage-gated channel auxiliary subunit gamma 4
227955_s_at	2.14e-20	8.61e-22	-11.5529	38.7997	-1.76744	EFNA5	ephrin A5
225337_at	2.17e-20	8.74e-22	-11.5503	38.7848	-1.60506	ABHD2	abhydrolase domain containing 2
201668_x_at	2.18e-20	8.81e-22	11.5491	38.7777	1.30358	MARCKS	myristoylated alanine rich protein kinase C substrate
227319_at	2.2e-20	8.86e-22	-11.5479	38.7712	-1.0247	KLHL36	kelch like family member 36
201146_at	2.31e-20	9.32e-22	-11.5392	38.7211	-1.14872	NFE2L2	nuclear factor, erythroid 2 like 2
209571_at	2.33e-20	9.42e-22	-11.5375	38.7109	-0.826121	CIR1	corepressor interacting with RBPJ, 1
201403_s_at	2.35e-20	9.51e-22	-11.5358	38.7014	-1.24411	MGST3	microsomal glutathione S-transferase 3
230144_at	2.39e-20	9.69e-22	-11.5326	38.6826	-0.632956	GRIA3	glutamate ionotropic receptor AMPA type subunit 3
244659_at	2.44e-20	9.89e-22	-11.529	38.6621	-1.15912	TRIP12	thyroid hormone receptor interactor 12
207056_s_at	2.49e-20	1.01e-21	-11.5256	38.6425	-1.41235	SLC4A8	solute carrier family 4 member 8
1555360_a_at	2.51e-20	1.02e-21	11.5239	38.6326	0.835286	DNAJC11	DnaJ heat shock protein family (Hsp40) member C11
209691_s_at	2.52e-20	1.02e-21	-11.523	38.6276	-1.85597	DOK4	docking protein 4
211557_x_at	2.52e-20	1.02e-21	11.5235	38.6304	1.26953	SLCO2B1	solute carrier organic anion transporter family member 2B1
227506_at	2.62e-20	1.06e-21	-11.5165	38.59	-2.83407	SLC16A9	solute carrier family 16 member 9
205441_at	2.64e-20	1.08e-21	-11.5146	38.579	-0.875409	OCEL1	occludin/ELL domain containing 1
206064_s_at	2.64e-20	1.08e-21	11.5146	38.5792	0.690288	PPIL2	peptidylprolyl isomerase like 2
1553186_x_at	2.67e-20	1.09e-21	-11.5122	38.5653	-1.72149	RASEF	RAS and EF-hand domain containing
218401_s_at	2.69e-20	1.1e-21	-11.5109	38.5575	-1.57215	ZNF281	zinc finger protein 281
230209_at	2.69e-20	1.1e-21	-11.5111	38.5585	-0.673851	ZXDC	ZXD family zinc finger C
218484_at	2.69e-20	1.1e-21	11.5108	38.5568	1.34257	NDUFA4L2	NDUFA4, mitochondrial complex associated like 2
243677_at	2.72e-20	1.11e-21	-11.5086	38.5444	-0.591687	GORASP1	golgi reassembly stacking protein 1
224302_s_at	2.73e-20	1.12e-21	-11.5084	38.543	-1.0354	MRPS36	mitochondrial ribosomal protein S36
201234_at	2.81e-20	1.15e-21	11.503	38.5123	1.57822	ILK	integrin linked kinase
228113_at	2.84e-20	1.16e-21	-11.5012	38.5019	-1.88539	RAB37	RAB37, member RAS oncogene family
231243_s_at	2.86e-20	1.17e-21	11.4996	38.4922	1.07054	BHLHE41	basic helix-loop-helix family member e41
243201_at	2.89e-20	1.18e-21	-11.4979	38.4827	-0.67885	RPL36A	ribosomal protein L36a
229125_at	2.93e-20	1.2e-21	-11.4953	38.4676	-2.01902	KANK4	KN motif and ankyrin repeat domains 4
229582_at	2.95e-20	1.21e-21	-11.4942	38.4614	-1.42854	INO80C	INO80 complex subunit C
238167_at	2.97e-20	1.22e-21	-11.4927	38.4524	-0.603147	C17orf51	chromosome 17 open reading frame 51
227660_at	3.05e-20	1.25e-21	11.4882	38.4264	1.05552	ANTXR1	anthrax toxin receptor 1
201616_s_at	3.05e-20	1.26e-21	11.4877	38.4235	2.95479	CALD1	caldesmon 1
243296_at	3.15e-20	1.3e-21	11.4823	38.3929	2.31163	NAMPT	nicotinamide phosphoribosyltransferase
202785_at	3.2e-20	1.32e-21	-11.4794	38.3758	-0.966781	NDUFA7	NADH:ubiquinone oxidoreductase subunit A7
1563445_x_at	3.21e-20	1.33e-21	11.4783	38.3695	1.20942	CTSLP8	cathepsin L pseudogene 8
236953_s_at	3.23e-20	1.34e-21	-11.4772	38.363	-1.31478	NHLRC3	NHL repeat containing 3
230440_at	3.23e-20	1.34e-21	11.477	38.3621	0.992885	ZNF469	zinc finger protein 469
222526_at	3.24e-20	1.34e-21	-11.4766	38.36	-0.90588	GATAD2A	GATA zinc finger domain containing 2A
225041_at	3.37e-20	1.4e-21	-11.4692	38.3172	-1.21816	MPHOSPH8	M-phase phosphoprotein 8
233430_at	3.42e-20	1.42e-21	-11.4667	38.3026	-0.764125	TBC1D22B	TBC1 domain family member 22B
225197_at	3.43e-20	1.42e-21	-11.4663	38.3005	-1.18154	C16orf72	chromosome 16 open reading frame 72
204971_at	3.45e-20	1.43e-21	-11.465	38.293	-2.80605	CSTA	cystatin A
208407_s_at	3.46e-20	1.44e-21	-11.4647	38.2913	-1.42423	TMX2-CTNND1///CTNND1	TMX2-CTNND1 readthrough (NMD candidate)///catenin delta 1
1561405_s_at	3.46e-20	1.44e-21	-11.4644	38.2897	-0.960914	LOC101930343///STRC///CATSPER2	uncharacterized LOC101930343///stereocilin///cation channel sperm associated 2
210815_s_at	3.46e-20	1.44e-21	11.4646	38.2905	2.20344	CALCRL	calcitonin receptor like receptor
217961_at	3.48e-20	1.45e-21	-11.4636	38.285	-0.778042	SLC25A38	solute carrier family 25 member 38
237040_at	3.49e-20	1.45e-21	-11.4627	38.2794	-1.02305	CWF19L2	CWF19-like 2, cell cycle control (S. pombe)
212320_at	3.5e-20	1.46e-21	11.4622	38.2766	0.929018	TUBB	tubulin beta class I
210158_at	3.52e-20	1.47e-21	11.4611	38.2705	0.637776	ERCC4	ERCC excision repair 4, endonuclease catalytic subunit
219408_at	3.53e-20	1.47e-21	-11.4604	38.2665	-0.844074	PRMT7	protein arginine methyltransferase 7
212930_at	3.56e-20	1.48e-21	-11.459	38.2584	-1.50499	ATP2B1	ATPase plasma membrane Ca2+ transporting 1
222256_s_at	3.66e-20	1.53e-21	-11.4543	38.2314	-0.742283	JMJD7///JMJD7-PLA2G4B	jumonji domain containing 7///JMJD7-PLA2G4B readthrough
205967_at	3.73e-20	1.56e-21	-11.4508	38.2113	-1.7716	HIST2H4B///HIST4H4///HIST2H4A///HIST1H4L///HIST1H4E///HIST1H4B///HIST1H4H///HIST1H4C///HIST1H4J///HIST1H4K///HIST1H4F///HIST1H4D///HIST1H4A///HIST1H4I	histone cluster 2, H4b///histone cluster 4, H4///histone cluster 2, H4a///histone cluster 1, H4l///histone cluster 1, H4e///histone cluster 1, H4b///histone cluster 1, H4h///histone cluster 1, H4c///histone cluster 1, H4j///histone cluster 1, H4k///histone cluster 1, H4f///histone cluster 1, H4d///histone cluster 1, H4a///histone cluster 1, H4i
227581_at	3.76e-20	1.57e-21	-11.4495	38.2032	-0.668948	TECPR1	tectonin beta-propeller repeat containing 1
223823_at	3.78e-20	1.58e-21	-11.4483	38.1965	-1.30264	KCNMB2	potassium calcium-activated channel subfamily M regulatory beta subunit 2
218846_at	3.82e-20	1.6e-21	-11.4465	38.1863	-0.948961	MED23	mediator complex subunit 23
218815_s_at	3.85e-20	1.61e-21	-11.445	38.1774	-0.957499	TMEM51	transmembrane protein 51
238644_at	3.86e-20	1.62e-21	11.4444	38.1743	1.07344	MYSM1	Myb like, SWIRM and MPN domains 1
235146_at	3.87e-20	1.62e-21	-11.4441	38.1725	-1.93866	TMCC3	transmembrane and coiled-coil domain family 3
222483_at	3.95e-20	1.65e-21	-11.4404	38.1508	-1.54159	EFHD2	EF-hand domain family member D2
208782_at	4.03e-20	1.69e-21	11.4368	38.1302	2.0497	FSTL1	follistatin like 1
235435_at	4.04e-20	1.7e-21	-11.4361	38.1261	-1.03745	AASDH	aminoadipate-semialdehyde dehydrogenase
217941_s_at	4.05e-20	1.7e-21	-11.4354	38.1221	-1.36712	ERBIN	erbb2 interacting protein
241955_at	4.05e-20	1.7e-21	-11.4354	38.1219	-1.17595	HECTD1	HECT domain E3 ubiquitin protein ligase 1
202500_at	4.06e-20	1.71e-21	-11.4348	38.1185	-0.895037	DNAJB2	DnaJ heat shock protein family (Hsp40) member B2
239053_at	4.06e-20	1.7e-21	-11.4352	38.1207	-0.869982	CIAO1	cytosolic iron-sulfur assembly component 1
1554344_s_at	4.14e-20	1.74e-21	11.4313	38.0983	0.541376	AQP12B///AQP12A	aquaporin 12B///aquaporin 12A
204484_at	4.22e-20	1.78e-21	-11.4278	38.0781	-1.02717	PIK3C2B	phosphatidylinositol-4-phosphate 3-kinase catalytic subunit type 2 beta
211521_s_at	4.34e-20	1.83e-21	11.4229	38.0499	0.728022	CYTH4	cytohesin 4
218000_s_at	4.4e-20	1.86e-21	11.4205	38.0365	1.33262	PHLDA1	pleckstrin homology like domain family A member 1
216411_s_at	4.48e-20	1.89e-21	-11.4171	38.0168	-0.95839	GALK2	galactokinase 2
223507_at	4.52e-20	1.91e-21	-11.4158	38.009	-0.83922	CLPX	caseinolytic mitochondrial matrix peptidase chaperone subunit
205446_s_at	4.52e-20	1.91e-21	11.4156	38.0082	1.02211	ATF2	activating transcription factor 2
227682_at	4.61e-20	1.95e-21	-11.4122	37.9883	-1.24861	SPPL2A	signal peptide peptidase like 2A
223213_s_at	4.63e-20	1.96e-21	-11.4114	37.9838	-1.41065	ZHX1	zinc fingers and homeoboxes 1
232640_at	4.71e-20	1.99e-21	-11.4083	37.9656	-0.745556	COMMD5	COMM domain containing 5
213568_at	4.79e-20	2.03e-21	11.4053	37.9486	2.8368	OSR2	odd-skipped related transciption factor 2
229460_at	4.89e-20	2.07e-21	-11.4014	37.9259	-1.43475	FAM126B	family with sequence similarity 126 member B
212310_at	4.95e-20	2.1e-21	-11.3989	37.9116	-1.76028	MIA3	MIA family member 3, ER export factor
232026_at	4.96e-20	2.11e-21	-11.3986	37.9098	-1.0705	HERC4	HECT and RLD domain containing E3 ubiquitin protein ligase 4
225181_at	4.99e-20	2.12e-21	-11.3974	37.9027	-1.06559	ARID1B	AT-rich interaction domain 1B
217369_at	5.02e-20	2.13e-21	11.3964	37.8974	1.56797	LOC101930405///IGHG1	uncharacterized LOC101930405///immunoglobulin heavy constant gamma 1 (G1m marker)
1569661_at	5.08e-20	2.16e-21	-11.3943	37.8848	-0.447409	NPAS3	neuronal PAS domain protein 3
227772_at	5.23e-20	2.23e-21	-11.389	37.8548	-1.15544	LATS1	large tumor suppressor kinase 1
205426_s_at	5.35e-20	2.28e-21	11.3848	37.8303	1.25194	HIP1	huntingtin interacting protein 1
200935_at	5.37e-20	2.29e-21	11.3843	37.8275	1.50867	CALR	calreticulin
201801_s_at	5.4e-20	2.31e-21	11.3829	37.8194	2.01957	SLC29A1	solute carrier family 29 member 1 (Augustine blood group)
201389_at	5.44e-20	2.33e-21	11.3817	37.8122	2.88628	ITGA5	integrin subunit alpha 5
200665_s_at	5.48e-20	2.34e-21	11.3802	37.8039	2.02695	SPARC	secreted protein acidic and cysteine rich
201038_s_at	5.49e-20	2.35e-21	-11.3796	37.8002	-1.07104	ANP32A	acidic nuclear phosphoprotein 32 family member A
230543_at	5.54e-20	2.37e-21	11.3781	37.7914	1.65362	USP9X	ubiquitin specific peptidase 9, X-linked
206038_s_at	5.62e-20	2.41e-21	-11.3754	37.776	-0.837306	NR2C2	nuclear receptor subfamily 2 group C member 2
237363_at	5.74e-20	2.47e-21	-11.3715	37.7537	-0.862443	SPATA6L	spermatogenesis associated 6 like
214174_s_at	5.97e-20	2.56e-21	-11.3648	37.7151	-0.678071	PDLIM4	PDZ and LIM domain 4
201531_at	5.99e-20	2.57e-21	11.3641	37.7109	1.53919	ZFP36	ZFP36 ring finger protein
219433_at	6.03e-20	2.59e-21	-11.3628	37.7035	-0.984805	BCOR	BCL6 corepressor
236196_at	6.13e-20	2.64e-21	-11.3599	37.6868	-1.12381	ZNF326	zinc finger protein 326
209959_at	6.15e-20	2.65e-21	11.3592	37.6828	2.11448	NR4A3	nuclear receptor subfamily 4 group A member 3
231427_at	6.26e-20	2.7e-21	11.3559	37.6638	0.56348	LOC284648	uncharacterized LOC284648
202175_at	6.33e-20	2.73e-21	11.3539	37.6522	1.06277	CHPF	chondroitin polymerizing factor
230621_at	6.52e-20	2.81e-21	11.349	37.6236	1.50268	IAH1	isoamyl acetate-hydrolyzing esterase 1 homolog
212612_at	6.54e-20	2.82e-21	-11.3483	37.62	-1.22189	RCOR1	REST corepressor 1
209964_s_at	6.61e-20	2.85e-21	11.3464	37.6086	1.11454	ATXN7	ataxin 7
228297_at	6.61e-20	2.85e-21	11.3464	37.6086	2.00978	CNN3	calponin 3
204790_at	6.71e-20	2.9e-21	-11.3434	37.5917	-1.15814	SMAD7	SMAD family member 7
203470_s_at	6.71e-20	2.9e-21	11.3434	37.5917	1.59052	PLEK	pleckstrin
207158_at	6.74e-20	2.92e-21	-11.3426	37.5868	-3.68643	APOBEC1	apolipoprotein B mRNA editing enzyme catalytic subunit 1
219889_at	6.81e-20	2.95e-21	-11.3408	37.5765	-1.14844	FRAT1	frequently rearranged in advanced T-cell lymphomas 1
207253_s_at	6.81e-20	2.95e-21	-11.3408	37.5767	-0.602709	UBN1	ubinuclein 1
212033_at	6.98e-20	3.03e-21	-11.3362	37.5501	-0.919271	RBM25	RNA binding motif protein 25
237555_at	7e-20	3.03e-21	11.3358	37.5476	0.798861	CARS2	cysteinyl-tRNA synthetase 2, mitochondrial (putative)
209931_s_at	7.08e-20	3.07e-21	-11.3338	37.5361	-1.45049	MFSD2B///FKBP1B	major facilitator superfamily domain containing 2B///FK506 binding protein 1B
226272_at	7.11e-20	3.09e-21	-11.3328	37.5305	-1.63605	RCAN3	RCAN family member 3
201806_s_at	7.12e-20	3.09e-21	11.3326	37.5291	0.921167	ATXN2L	ataxin 2 like
232305_at	7.13e-20	3.1e-21	-11.3323	37.5274	-0.767483	HMGCLL1	3-hydroxymethyl-3-methylglutaryl-CoA lyase like 1
217097_s_at	7.15e-20	3.11e-21	11.3317	37.5242	1.20393	PHTF2	putative homeodomain transcription factor 2
209570_s_at	7.17e-20	3.11e-21	-11.3312	37.5214	-1.47435	NSG1	neuron specific gene family member 1
211937_at	7.22e-20	3.14e-21	11.3298	37.5133	0.822282	EIF4B	eukaryotic translation initiation factor 4B
1562738_a_at	7.31e-20	3.18e-21	-11.3274	37.4993	-0.677455	USP3-AS1	USP3 antisense RNA 1
241879_at	7.49e-20	3.27e-21	11.3231	37.4745	2.20965	LPP	LIM domain containing preferred translocation partner in lipoma
236288_at	7.59e-20	3.31e-21	-11.3207	37.4608	-1.26066	RNF34	ring finger protein 34
201635_s_at	7.75e-20	3.39e-21	11.3168	37.4384	1.06926	FXR1	FMR1 autosomal homolog 1
207394_at	7.77e-20	3.39e-21	-11.3164	37.436	-1.78774	ZNF137P	zinc finger protein 137, pseudogene
204242_s_at	7.9e-20	3.46e-21	-11.3133	37.418	-1.00286	ACOX3	acyl-CoA oxidase 3, pristanoyl
243052_at	7.94e-20	3.48e-21	11.3123	37.4123	0.598341	MOB3C	MOB kinase activator 3C
1552727_s_at	7.97e-20	3.49e-21	-11.3116	37.4084	-1.78346	ADAMTS17	ADAM metallopeptidase with thrombospondin type 1 motif 17
224965_at	8.07e-20	3.54e-21	11.3093	37.3948	1.21301	GNG2	G protein subunit gamma 2
1553572_a_at	8.12e-20	3.56e-21	11.3081	37.3882	0.971957	CYGB	cytoglobin
233132_at	8.16e-20	3.58e-21	-11.3072	37.3829	-0.685994	BMS1P20	BMS1, ribosome biogenesis factor pseudogene 20
242879_x_at	8.3e-20	3.64e-21	11.3042	37.3652	0.679568	AKT3	AKT serine/threonine kinase 3
215434_x_at	8.37e-20	3.68e-21	11.3025	37.3557	1.12495	LOC102724250///NBPF26///NBPF19///NBPF10///NBPF15///NBPF11///NBPF1///NBPF14	neuroblastoma breakpoint family member 1///neuroblastoma breakpoint family member 26///neuroblastoma breakpoint family member 19///neuroblastoma breakpoint family member 10///neuroblastoma breakpoint family member 15///neuroblastoma breakpoint family member 11///neuroblastoma breakpoint family member 1///neuroblastoma breakpoint family member 14
216080_s_at	8.4e-20	3.69e-21	11.3018	37.3517	1.72078	FADS3	fatty acid desaturase 3
240020_at	8.43e-20	3.71e-21	-11.301	37.3472	-0.776986	CYB5R4	cytochrome b5 reductase 4
202772_at	8.45e-20	3.72e-21	-11.3005	37.3439	-0.767971	HMGCL	3-hydroxymethyl-3-methylglutaryl-CoA lyase
230176_at	8.49e-20	3.74e-21	-11.2996	37.3388	-1.10243	UEVLD	UEV and lactate/malate dehyrogenase domains
229419_at	8.53e-20	3.76e-21	-11.2987	37.3339	-1.09328	FBXW7	F-box and WD repeat domain containing 7
212119_at	8.81e-20	3.9e-21	11.2927	37.299	1.42903	RHOQ	ras homolog family member Q
236702_at	8.83e-20	3.91e-21	-11.2922	37.2961	-0.875936	RTFDC1	replication termination factor 2 domain containing 1
226886_at	8.96e-20	3.97e-21	-11.2896	37.2814	-1.71901	GFPT1	glutamine--fructose-6-phosphate transaminase 1
1568634_a_at	9.01e-20	3.99e-21	-11.2886	37.2757	-3.69391	LRRC66	leucine rich repeat containing 66
235155_at	9.08e-20	4.02e-21	-11.2872	37.2674	-1.39425	BDH2	3-hydroxybutyrate dehydrogenase, type 2
222876_s_at	9.13e-20	4.04e-21	11.2863	37.2621	1.33004	ADAP2	ArfGAP with dual PH domains 2
238551_at	9.24e-20	4.1e-21	11.284	37.2492	1.04289	FUT11	fucosyltransferase 11
203227_s_at	9.92e-20	4.4e-21	-11.2716	37.1776	-0.937018	TSPAN31	tetraspanin 31
212841_s_at	1.04e-19	4.6e-21	-11.2639	37.1332	-1.65311	PPFIBP2	PPFIA binding protein 2
201426_s_at	1.04e-19	4.64e-21	11.2624	37.1245	1.40577	VIM	vimentin
228157_at	1.05e-19	4.66e-21	-11.2619	37.1215	-1.54807	ZNF207	zinc finger protein 207
232675_s_at	1.05e-19	4.65e-21	11.2623	37.1235	0.960547	UCKL1	uridine-cytidine kinase 1 like 1
215726_s_at	1.07e-19	4.75e-21	-11.2583	37.101	-1.46949	CYB5A	cytochrome b5 type A
214045_at	1.07e-19	4.78e-21	-11.2573	37.0952	-1.22413	LIAS	lipoic acid synthetase
207335_x_at	1.07e-19	4.79e-21	-11.2572	37.0943	-0.761846	ATP5I	ATP synthase, H+ transporting, mitochondrial Fo complex subunit E
207050_at	1.07e-19	4.78e-21	11.2573	37.0952	0.755268	CACNA2D1	calcium voltage-gated channel auxiliary subunit alpha2delta 1
206943_at	1.08e-19	4.83e-21	11.2556	37.0849	1.28654	TGFBR1	transforming growth factor beta receptor 1
233140_s_at	1.09e-19	4.86e-21	11.2544	37.0782	0.613971	VIPAS39	VPS33B interacting protein, apical-basolateral polarity regulator, spe-39 homolog
221036_s_at	1.09e-19	4.88e-21	11.254	37.076	0.88346	APH1B	aph-1 homolog B, gamma-secretase subunit
1565717_s_at	1.09e-19	4.86e-21	11.2545	37.0789	1.17253	FUS	FUS RNA binding protein
203446_s_at	1.1e-19	4.9e-21	-11.2532	37.0715	-0.906632	OCRL	OCRL, inositol polyphosphate-5-phosphatase
207351_s_at	1.11e-19	4.98e-21	11.2504	37.0549	1.03432	SH2D2A	SH2 domain containing 2A
233637_at	1.12e-19	5.01e-21	11.2494	37.0493	1.26828	DCAF8	DDB1 and CUL4 associated factor 8
221785_at	1.13e-19	5.06e-21	11.2476	37.0389	0.869346	WIZ	widely interspaced zinc finger motifs
212365_at	1.13e-19	5.03e-21	11.2486	37.0447	1.32367	MYO1B	myosin IB
225669_at	1.14e-19	5.09e-21	-11.2467	37.0337	-0.815955	IFNAR1	interferon alpha and beta receptor subunit 1
226507_at	1.15e-19	5.16e-21	-11.2442	37.0194	-0.901	PAK1	p21 (RAC1) activated kinase 1
230241_at	1.18e-19	5.31e-21	-11.2394	36.9916	-1.03256	TOR1AIP2	torsin 1A interacting protein 2
201364_s_at	1.19e-19	5.34e-21	11.2384	36.986	0.952191	OAZ2	ornithine decarboxylase antizyme 2
207959_s_at	1.22e-19	5.46e-21	-11.2345	36.9637	-0.527081	DNAH9	dynein axonemal heavy chain 9
218392_x_at	1.23e-19	5.54e-21	-11.232	36.9491	-1.42635	SFXN1	sideroflexin 1
240106_at	1.24e-19	5.58e-21	-11.2306	36.9411	-0.931786	GNPTAB	N-acetylglucosamine-1-phosphate transferase alpha and beta subunits
231951_at	1.27e-19	5.7e-21	11.227	36.9204	1.25536	GNAO1	G protein subunit alpha o1
218192_at	1.32e-19	5.93e-21	-11.2203	36.8819	-0.831642	IP6K2	inositol hexakisphosphate kinase 2
204463_s_at	1.34e-19	6.02e-21	11.2177	36.8667	3.22228	EDNRA	endothelin receptor type A
223079_s_at	1.35e-19	6.09e-21	11.2157	36.855	2.12035	GLS	glutaminase
238715_at	1.36e-19	6.12e-21	-11.2148	36.8498	-0.89901	LOC646014	uncharacterized LOC646014
226742_at	1.39e-19	6.27e-21	-11.2106	36.8259	-1.23874	SAR1B	secretion associated Ras related GTPase 1B
211580_s_at	1.39e-19	6.26e-21	11.211	36.828	1.07722	PIK3R3	phosphoinositide-3-kinase regulatory subunit 3
1553581_s_at	1.4e-19	6.3e-21	-11.2097	36.8204	-1.11497	SREK1IP1	SREK1 interacting protein 1
212067_s_at	1.41e-19	6.36e-21	11.2082	36.8118	2.32	C1R	complement C1r subcomponent
229599_at	1.43e-19	6.47e-21	-11.2052	36.7944	-1.55497	SMIM22	small integral membrane protein 22
243309_at	1.47e-19	6.66e-21	-11.2003	36.7661	-1.5484	C15orf65	chromosome 15 open reading frame 65
204149_s_at	1.47e-19	6.64e-21	11.2008	36.769	2.08004	GSTM4	glutathione S-transferase mu 4
222458_s_at	1.49e-19	6.74e-21	11.1982	36.7539	1.01336	AKIRIN1	akirin 1
211300_s_at	1.49e-19	6.75e-21	11.1978	36.7521	1.85124	TP53	tumor protein p53
240528_s_at	1.5e-19	6.79e-21	11.1968	36.7462	1.05663	EXOC4	exocyst complex component 4
212501_at	1.5e-19	6.81e-21	11.1964	36.7438	1.34856	CEBPB	CCAAT/enhancer binding protein beta
204022_at	1.52e-19	6.91e-21	-11.1937	36.7285	-0.982072	WWP2	WW domain containing E3 ubiquitin protein ligase 2
223612_s_at	1.59e-19	7.24e-21	-11.1857	36.6822	-0.923376	LNX1	ligand of numb-protein X 1
222563_s_at	1.61e-19	7.35e-21	11.1833	36.6683	0.872835	TNKS2	tankyrase 2
210797_s_at	1.62e-19	7.37e-21	-11.1828	36.6656	-2.0739	OASL	2'-5'-oligoadenylate synthetase like
203367_at	1.64e-19	7.48e-21	11.1801	36.6498	1.37364	DUSP14	dual specificity phosphatase 14
206263_at	1.66e-19	7.55e-21	-11.1786	36.6412	-1.16673	FMO4	flavin containing monooxygenase 4
207378_at	1.66e-19	7.57e-21	-11.1781	36.6383	-1.07968	TREH	trehalase
235749_at	1.7e-19	7.77e-21	-11.1737	36.6131	-1.70422	UGGT2	UDP-glucose glycoprotein glucosyltransferase 2
228469_at	1.71e-19	7.8e-21	-11.173	36.6091	-2.06348	PPID	peptidylprolyl isomerase D
204104_at	1.71e-19	7.83e-21	11.1724	36.6053	0.840573	SNAPC2	small nuclear RNA activating complex polypeptide 2
232751_at	1.77e-19	8.1e-21	11.1665	36.5716	0.892227	RBBP9	RB binding protein 9, serine hydrolase
232367_x_at	1.78e-19	8.12e-21	11.1661	36.5691	0.717514	ZNF598	zinc finger protein 598
201425_at	1.79e-19	8.19e-21	-11.1645	36.56	-1.28089	ALDH2	aldehyde dehydrogenase 2 family (mitochondrial)
219351_at	1.79e-19	8.19e-21	-11.1645	36.5601	-0.994634	TRAPPC2	trafficking protein particle complex 2
207578_s_at	1.81e-19	8.31e-21	11.1621	36.5462	0.589261	HTR4	5-hydroxytryptamine receptor 4
1569482_at	1.84e-19	8.45e-21	-11.1591	36.5289	-0.780921	TNRC6C	trinucleotide repeat containing 6C
218201_at	1.84e-19	8.42e-21	-11.1597	36.5322	-0.764735	NDUFB2	NADH:ubiquinone oxidoreductase subunit B2
200607_s_at	1.86e-19	8.54e-21	11.1573	36.5183	1.10706	RAD21	RAD21 cohesin complex component
242338_at	1.86e-19	8.52e-21	11.1577	36.5207	1.29271	TMEM64	transmembrane protein 64
217971_at	1.95e-19	8.97e-21	-11.1489	36.4698	-0.965042	LAMTOR3	late endosomal/lysosomal adaptor, MAPK and MTOR activator 3
228001_at	1.95e-19	8.97e-21	-11.1488	36.4692	-0.755814	TMEM50B	transmembrane protein 50B
1553137_s_at	1.96e-19	9.02e-21	11.1478	36.4636	0.859482	KLF11	Kruppel like factor 11
238959_at	1.97e-19	9.07e-21	11.1469	36.4582	1.00387	LARP4	La ribonucleoprotein domain family member 4
219025_at	1.99e-19	9.16e-21	11.1453	36.4489	1.96494	CD248	CD248 molecule
221629_x_at	2.01e-19	9.25e-21	11.1435	36.4389	0.694857	HGH1	HGH1 homolog
239859_x_at	2.05e-19	9.45e-21	-11.1399	36.418	-0.967495	ATP5S	ATP synthase, H+ transporting, mitochondrial Fo complex subunit s (factor B)
224163_s_at	2.06e-19	9.52e-21	-11.1386	36.4104	-0.729507	DMAP1	DNA methyltransferase 1 associated protein 1
223195_s_at	2.07e-19	9.54e-21	11.1382	36.408	1.0961	SESN2	sestrin 2
214116_at	2.15e-19	9.95e-21	-11.1309	36.3663	-1.2325	BTD	biotinidase
226870_at	2.16e-19	1e-20	-11.1298	36.3598	-1.31469	COMTD1	catechol-O-methyltransferase domain containing 1
203809_s_at	2.17e-19	1e-20	11.1293	36.3571	0.845509	AKT2	AKT serine/threonine kinase 2
226356_at	2.25e-19	1.04e-20	-11.1231	36.3212	-0.772415	MIGA2	mitoguardin 2
203561_at	2.3e-19	1.07e-20	11.119	36.2973	1.81072	FCGR2A	Fc fragment of IgG receptor IIa
226730_s_at	2.35e-19	1.09e-20	-11.1147	36.2729	-0.950289	USP37	ubiquitin specific peptidase 37
236534_at	2.36e-19	1.1e-20	-11.1139	36.2682	-0.620692	BNIPL///C1orf56	BCL2 interacting protein like///chromosome 1 open reading frame 56
219976_at	2.37e-19	1.1e-20	-11.1133	36.2644	-2.11872	HOOK1	hook microtubule tethering protein 1
225348_at	2.4e-19	1.11e-20	-11.1114	36.2534	-1.20614	SRSF10	serine and arginine rich splicing factor 10
230362_at	2.41e-19	1.12e-20	-11.1102	36.247	-0.83707	INPP5F	inositol polyphosphate-5-phosphatase F
209092_s_at	2.49e-19	1.16e-20	-11.1045	36.2138	-1.03078	GLOD4	glyoxalase domain containing 4
205090_s_at	2.52e-19	1.18e-20	-11.102	36.1996	-1.02339	NAGPA	N-acetylglucosamine-1-phosphodiester alpha-N-acetylglucosaminidase
219944_at	2.53e-19	1.18e-20	11.1014	36.196	1.23347	CLIP4	CAP-Gly domain containing linker protein family member 4
235533_at	2.54e-19	1.19e-20	-11.1005	36.1909	-1.05053	COX19	COX19, cytochrome c oxidase assembly factor
238596_at	2.61e-19	1.22e-20	-11.096	36.1649	-0.641412	FRA10AC1	fragile site, folic acid type, rare, fra(10)(q23.3) or fra(10)(q24.2) candidate 1
211464_x_at	2.63e-19	1.23e-20	-11.0946	36.1569	-1.11762	CASP6	caspase 6
227023_at	2.66e-19	1.24e-20	11.0925	36.1448	0.578714	ZFP41///GLI4	ZFP41 zinc finger protein///GLI family zinc finger 4
231299_at	2.66e-19	1.24e-20	11.0926	36.1454	0.924666	AGAP3	ArfGAP with GTPase domain, ankyrin repeat and PH domain 3
218477_at	2.67e-19	1.25e-20	-11.0916	36.1395	-1.26934	TMEM14A	transmembrane protein 14A
215100_at	2.7e-19	1.26e-20	-11.09	36.1302	-2.27114	ADTRP	androgen dependent TFPI regulating protein
1559883_s_at	2.71e-19	1.27e-20	11.0887	36.1227	1.70081	SAMHD1	SAM and HD domain containing deoxynucleoside triphosphate triphosphohydrolase 1
212927_at	2.81e-19	1.32e-20	-11.0824	36.0868	-1.20476	SMC5	structural maintenance of chromosomes 5
220209_at	2.81e-19	1.32e-20	11.0822	36.0855	0.649042	PYY2	peptide YY, 2 (pseudogene)
224674_at	2.84e-19	1.33e-20	11.0807	36.0766	1.12823	TTYH3	tweety family member 3
235483_at	2.89e-19	1.36e-20	-11.0775	36.0585	-0.97919	STX3	syntaxin 3
1554321_a_at	2.9e-19	1.37e-20	11.0765	36.0522	1.02351	NFS1	NFS1 cysteine desulfurase
1557455_s_at	2.91e-19	1.37e-20	11.076	36.0499	1.21307	MOSPD1	motile sperm domain containing 1
223143_s_at	2.93e-19	1.38e-20	11.075	36.0439	1.18976	AKIRIN2	akirin 2
204094_s_at	2.95e-19	1.39e-20	-11.0738	36.0367	-1.01113	TSC22D2	TSC22 domain family member 2
222567_s_at	2.96e-19	1.39e-20	11.0729	36.0317	0.880513	MEX3C	mex-3 RNA binding family member C
228713_s_at	3.02e-19	1.42e-20	11.0692	36.0107	0.939584	HSD17B14	hydroxysteroid 17-beta dehydrogenase 14
1559921_at	3.03e-19	1.43e-20	11.0687	36.0077	0.615253	PECAM1	platelet and endothelial cell adhesion molecule 1
233937_at	3.03e-19	1.43e-20	11.0687	36.0076	1.34652	GGNBP2	gametogenetin binding protein 2
204445_s_at	3.12e-19	1.47e-20	11.0634	35.9772	1.1096	ALOX5	arachidonate 5-lipoxygenase
212844_at	3.22e-19	1.52e-20	11.0578	35.9448	0.615222	RRP1B	ribosomal RNA processing 1B
231101_at	3.24e-19	1.53e-20	11.0568	35.9388	1.26518	PPP2R5E	protein phosphatase 2 regulatory subunit B'epsilon
223077_at	3.26e-19	1.54e-20	-11.0552	35.9296	-1.10864	TMOD3	tropomodulin 3
221518_s_at	3.3e-19	1.56e-20	-11.0534	35.9193	-0.853334	USP47	ubiquitin specific peptidase 47
209833_at	3.32e-19	1.57e-20	-11.052	35.9115	-0.816499	CRADD	CASP2 and RIPK1 domain containing adaptor with death domain
203254_s_at	3.32e-19	1.57e-20	11.0518	35.91	2.02567	TLN1	talin 1
225069_at	3.34e-19	1.58e-20	-11.0507	35.9039	-0.640981	PCYT1A	phosphate cytidylyltransferase 1, choline, alpha
226084_at	3.39e-19	1.61e-20	11.0481	35.8889	3.08351	MAP1B	microtubule associated protein 1B
224912_at	3.43e-19	1.63e-20	-11.0459	35.876	-0.846184	TTC7A	tetratricopeptide repeat domain 7A
209878_s_at	3.43e-19	1.63e-20	11.0459	35.8762	0.854365	RELA	RELA proto-oncogene, NF-kB subunit
228997_at	3.45e-19	1.64e-20	11.045	35.871	0.826426	TRNAU1AP	tRNA selenocysteine 1 associated protein 1
221473_x_at	3.45e-19	1.64e-20	11.0446	35.8684	1.01071	SERINC3	serine incorporator 3
206005_s_at	3.47e-19	1.65e-20	-11.0437	35.8634	-0.889671	CEP162	centrosomal protein 162
210655_s_at	3.48e-19	1.66e-20	11.043	35.8596	1.1945	FOXO3B///FOXO3	forkhead box O3B pseudogene///forkhead box O3
205141_at	3.49e-19	1.66e-20	-11.0427	35.8574	-2.50004	ANG	angiogenin
205142_x_at	3.49e-19	1.66e-20	11.0426	35.857	0.896843	ABCD1	ATP binding cassette subfamily D member 1
1557302_at	3.6e-19	1.72e-20	-11.037	35.825	-1.45972	ZNF585B	zinc finger protein 585B
209876_at	3.61e-19	1.72e-20	11.0362	35.8204	0.797432	GIT2	GIT ArfGAP 2
221613_s_at	3.67e-19	1.75e-20	-11.0335	35.8047	-0.851929	ZFAND6	zinc finger AN1-type containing 6
1556078_at	3.7e-19	1.77e-20	-11.0319	35.7952	-1.61244	LOC143286	uncharacterized LOC143286
201337_s_at	3.76e-19	1.8e-20	11.029	35.779	1.05061	VAMP3	vesicle associated membrane protein 3
239012_at	3.79e-19	1.81e-20	11.0277	35.771	1.13059	RNF144B	ring finger protein 144B
235131_at	3.82e-19	1.82e-20	11.0264	35.7635	1.60682	RHOJ	ras homolog family member J
219665_at	3.83e-19	1.83e-20	-11.0257	35.7597	-0.885011	NUDT18	nudix hydrolase 18
230130_at	3.83e-19	1.83e-20	11.0256	35.7592	3.94466	SLIT2	slit guidance ligand 2
207714_s_at	3.84e-19	1.84e-20	11.0253	35.7571	1.76786	SERPINH1	serpin family H member 1
207134_x_at	3.84e-19	1.84e-20	11.0249	35.7552	2.68899	TPSB2	tryptase beta 2 (gene/pseudogene)
229802_at	3.84e-19	1.84e-20	11.025	35.7555	3.33301	WISP1	WNT1 inducible signaling pathway protein 1
203320_at	3.91e-19	1.87e-20	11.0217	35.7369	1.16595	SH2B3	SH2B adaptor protein 3
1553944_at	4e-19	1.92e-20	-11.0174	35.712	-1.48265	MIA2///CTAGE5	melanoma inhibitory activity 2///CTAGE family member 5, ER export factor
227959_at	4.1e-19	1.97e-20	-11.0132	35.6878	-1.55205	ANKRD9	ankyrin repeat domain 9
237159_x_at	4.12e-19	1.98e-20	-11.0123	35.6823	-1.81301	AP1S3	adaptor related protein complex 1 sigma 3 subunit
228693_at	4.12e-19	1.98e-20	11.0125	35.6834	1.61904	CCDC50	coiled-coil domain containing 50
236248_x_at	4.13e-19	1.99e-20	-11.0115	35.6781	-0.767663	TADA2B	transcriptional adaptor 2B
1559682_at	4.18e-19	2.01e-20	11.0093	35.6653	0.53174	TRIM16L	tripartite motif containing 16-like
1552370_at	4.2e-19	2.02e-20	-11.0085	35.6603	-1.70214	C4orf33	chromosome 4 open reading frame 33
33494_at	4.24e-19	2.04e-20	-11.0069	35.6512	-1.54402	ETFDH	electron transfer flavoprotein dehydrogenase
218780_at	4.29e-19	2.07e-20	-11.0049	35.6396	-1.29673	HOOK2	hook microtubule tethering protein 2
1555815_a_at	4.29e-19	2.07e-20	11.0047	35.6388	0.802076	L3MBTL2	L3MBTL2 polycomb repressive complex 1 subunit
1562257_x_at	4.29e-19	2.07e-20	11.0045	35.6374	0.805499	NLRP1	NLR family pyrin domain containing 1
224649_x_at	4.3e-19	2.07e-20	-11.0044	35.6367	-0.970275	CCNY	cyclin Y
212139_at	4.32e-19	2.09e-20	-11.0033	35.6308	-0.64477	GCN1	GCN1, eIF2 alpha kinase activator homolog
220750_s_at	4.32e-19	2.08e-20	11.0035	35.6318	1.26406	P3H1	prolyl 3-hydroxylase 1
235902_at	4.4e-19	2.13e-20	-11	35.6116	-1.03364	HERC2P7	hect domain and RLD 2 pseudogene 7
1554376_s_at	4.4e-19	2.13e-20	-10.9999	35.6112	-0.803984	HACD1	3-hydroxyacyl-CoA dehydratase 1
236513_at	4.44e-19	2.15e-20	-10.9984	35.6025	-2.12821	PRELID2	PRELI domain containing 2
238896_at	4.51e-19	2.18e-20	10.9956	35.586	0.801332	ST3GAL2	ST3 beta-galactoside alpha-2,3-sialyltransferase 2
218432_at	4.52e-19	2.19e-20	-10.9951	35.5831	-1.14496	FBXO3	F-box protein 3
214919_s_at	4.57e-19	2.21e-20	-10.993	35.5712	-0.875654	ANKHD1-EIF4EBP3///ANKHD1///EIF4EBP3	ANKHD1-EIF4EBP3 readthrough///ankyrin repeat and KH domain containing 1///eukaryotic translation initiation factor 4E binding protein 3
206487_at	4.63e-19	2.25e-20	-10.9903	35.5555	-1.31722	SUN1	Sad1 and UNC84 domain containing 1
241706_at	4.63e-19	2.25e-20	10.99	35.5541	1.54457	CPNE8	copine 8
219615_s_at	4.73e-19	2.31e-20	-10.9861	35.5313	-2.12974	KCNK5	potassium two pore domain channel subfamily K member 5
224866_at	4.73e-19	2.3e-20	-10.9863	35.5326	-1.65388	FAR1	fatty acyl-CoA reductase 1
210378_s_at	4.73e-19	2.3e-20	-10.9864	35.5329	-0.735769	SSNA1	SS nuclear autoantigen 1
232551_at	4.76e-19	2.32e-20	10.9851	35.5258	0.905865	SLC26A6	solute carrier family 26 member 6
238937_at	4.77e-19	2.32e-20	-10.9848	35.5238	-1.31044	ZNF420	zinc finger protein 420
201308_s_at	4.78e-19	2.33e-20	10.9841	35.5202	1.56065	2019-09-11	septin 11
213125_at	4.82e-19	2.35e-20	10.9825	35.5109	2.50085	OLFML2B	olfactomedin like 2B
219147_s_at	4.83e-19	2.36e-20	-10.9822	35.5087	-1.29168	NMRK1	nicotinamide riboside kinase 1
226263_at	4.83e-19	2.36e-20	-10.9821	35.5087	-0.889633	SNRNP48	small nuclear ribonucleoprotein U11/U12 subunit 48
235620_x_at	4.85e-19	2.37e-20	-10.9813	35.5036	-1.03742	ZMYM5	zinc finger MYM-type containing 5
203922_s_at	4.89e-19	2.39e-20	10.9798	35.4952	1.91506	CYBB	cytochrome b-245 beta chain
211573_x_at	4.91e-19	2.4e-20	10.9792	35.4919	1.65486	TGM2	transglutaminase 2
238805_at	4.98e-19	2.43e-20	-10.9766	35.477	-2.18467	HSPB2-C11orf52///C11orf52///HSPB2	HSPB2-C11orf52 readthrough (NMD candidate)///chromosome 11 open reading frame 52///heat shock protein family B (small) member 2
243042_at	5.03e-19	2.46e-20	-10.9747	35.4659	-1.13178	MIGA1	mitoguardin 1
227205_at	5.06e-19	2.48e-20	-10.9735	35.459	-0.93173	TAF1	TATA-box binding protein associated factor 1
235868_at	5.06e-19	2.48e-20	10.9735	35.4589	1.17537	MGEA5	meningioma expressed antigen 5 (hyaluronidase)
210281_s_at	5.07e-19	2.49e-20	10.9731	35.4564	1.48437	ZMYM2	zinc finger MYM-type containing 2
205683_x_at	5.09e-19	2.5e-20	10.9724	35.4526	2.71897	TPSAB1	tryptase alpha/beta 1
205797_s_at	5.13e-19	2.52e-20	10.9708	35.4435	0.558058	TCP11L1	t-complex 11 like 1
202337_at	5.15e-19	2.53e-20	10.9701	35.4392	0.864395	PMF1	polyamine-modulated factor 1
232272_at	5.19e-19	2.55e-20	-10.9686	35.4304	-0.830754	ZNF624	zinc finger protein 624
223765_s_at	5.2e-19	2.56e-20	10.9683	35.4287	0.970562	KBTBD4	kelch repeat and BTB domain containing 4
203523_at	5.33e-19	2.62e-20	10.9638	35.4032	1.42481	LSP1	lymphocyte-specific protein 1
91617_at	5.38e-19	2.65e-20	-10.9622	35.3938	-0.617203	MIR1306///DGCR8	microRNA 1306///DGCR8 microprocessor complex subunit
226230_at	5.46e-19	2.69e-20	-10.9595	35.3782	-1.18385	PPP4R3B	protein phosphatase 4 regulatory subunit 3B
1568892_at	5.61e-19	2.76e-20	10.9547	35.3506	0.475542	LOC100996251	uncharacterized LOC100996251
211949_s_at	5.62e-19	2.77e-20	10.9543	35.3481	1.12579	NOLC1	nucleolar and coiled-body phosphoprotein 1
230585_at	5.68e-19	2.8e-20	-10.9523	35.3369	-2.63273	KCNJ15	potassium voltage-gated channel subfamily J member 15
202224_at	5.69e-19	2.81e-20	-10.9518	35.3337	-0.843902	CRK	CRK proto-oncogene, adaptor protein
223194_s_at	5.71e-19	2.82e-20	-10.9513	35.3311	-2.08908	SLC22A23	solute carrier family 22 member 23
1559322_at	5.76e-19	2.85e-20	-10.9495	35.3207	-1.44381	LOC727916	uncharacterized LOC727916
236034_at	5.84e-19	2.89e-20	10.9471	35.307	1.34233	ANGPT2	angiopoietin 2
34478_at	5.91e-19	2.93e-20	10.9449	35.2941	1.08991	RAB11B	RAB11B, member RAS oncogene family
205851_at	6.05e-19	3e-20	-10.9408	35.2704	-0.888829	NME6	NME/NM23 nucleoside diphosphate kinase 6
208730_x_at	6.05e-19	3e-20	-10.9406	35.2693	-0.64862	RAB2A	RAB2A, member RAS oncogene family
204278_s_at	6.07e-19	3.01e-20	-10.9401	35.2664	-0.957286	EBAG9	estrogen receptor binding site associated, antigen, 9
224843_at	6.09e-19	3.02e-20	-10.9393	35.2621	-0.937377	SLAIN2	SLAIN motif family member 2
231879_at	6.24e-19	3.1e-20	10.935	35.2369	2.88631	COL12A1	collagen type XII alpha 1 chain
228543_at	6.36e-19	3.16e-20	-10.9316	35.2172	-1.58801	PET117	PET117 homolog
218085_at	6.5e-19	3.24e-20	-10.9276	35.1941	-1.22742	CHMP5	charged multivesicular body protein 5
1558533_at	6.69e-19	3.34e-20	10.9223	35.164	0.700117	KRBA2	KRAB-A domain containing 2
218607_s_at	6.81e-19	3.4e-20	10.9192	35.1462	0.646816	SDAD1	SDA1 domain containing 1
222061_at	6.82e-19	3.4e-20	-10.9191	35.1452	-0.887214	CD58	CD58 molecule
213397_x_at	6.91e-19	3.45e-20	-10.9164	35.1301	-2.10779	RNASE4	ribonuclease A family member 4
229803_s_at	6.92e-19	3.46e-20	10.9161	35.1281	0.93974	RPS10-NUDT3///NUDT3	RPS10-NUDT3 readthrough///nudix hydrolase 3
207535_s_at	7.02e-19	3.51e-20	10.9135	35.1132	1.09853	NFKB2	nuclear factor kappa B subunit 2
218158_s_at	7.32e-19	3.66e-20	-10.9063	35.0714	-0.945055	APPL1	adaptor protein, phosphotyrosine interacting with PH domain and leucine zipper 1
203438_at	7.34e-19	3.67e-20	10.9057	35.0684	1.39928	STC2	stanniocalcin 2
1560848_at	7.43e-19	3.72e-20	-10.9035	35.0555	-0.576493	LOC101927490	uncharacterized LOC101927490
236283_x_at	7.51e-19	3.77e-20	-10.9013	35.0431	-0.919049	LOC646214	p21 protein (Cdc42/Rac)-activated kinase 2 pseudogene
234941_s_at	7.51e-19	3.77e-20	10.9014	35.0433	0.7698	GPHN	gephyrin
223268_at	7.59e-19	3.81e-20	-10.8995	35.0325	-1.4329	C11orf54	chromosome 11 open reading frame 54
1558588_at	7.61e-19	3.82e-20	10.8991	35.03	1.34097	LOC100996741///LINC00869	uncharacterized LOC100996741///long intergenic non-protein coding RNA 869
214782_at	7.63e-19	3.83e-20	-10.8985	35.0268	-1.33686	CTTN	cortactin
213927_at	7.7e-19	3.87e-20	-10.8968	35.017	-1.65579	MAP3K9	mitogen-activated protein kinase kinase kinase 9
212492_s_at	7.8e-19	3.92e-20	10.8943	35.0026	0.944321	KDM4B	lysine demethylase 4B
231962_at	7.86e-19	3.96e-20	-10.8929	34.9944	-0.63132	AP4B1	adaptor related protein complex 4 beta 1 subunit
203297_s_at	7.87e-19	3.96e-20	-10.8927	34.9933	-0.688389	JARID2	jumonji and AT-rich interaction domain containing 2
230393_at	7.99e-19	4.02e-20	-10.89	34.9777	-0.771777	CUL5	cullin 5
207181_s_at	8.24e-19	4.15e-20	-10.8845	34.9461	-1.75431	CASP7	caspase 7
202273_at	8.24e-19	4.16e-20	10.8843	34.9451	1.97746	PDGFRB	platelet derived growth factor receptor beta
207396_s_at	8.26e-19	4.17e-20	10.8837	34.9416	0.98875	ALG3	ALG3, alpha-1,3- mannosyltransferase
212069_s_at	8.26e-19	4.17e-20	10.8838	34.942	1.09582	PRRC2B	proline rich coiled-coil 2B
204232_at	8.26e-19	4.17e-20	10.8838	34.9418	1.81972	FCER1G	Fc fragment of IgE receptor Ig
236887_at	8.33e-19	4.21e-20	-10.8823	34.9333	-0.932854	KIN	Kin17 DNA and RNA binding protein
1554728_at	8.39e-19	4.24e-20	-10.8809	34.9255	-0.700125	SLC9A1	solute carrier family 9 member A1
210183_x_at	8.58e-19	4.34e-20	-10.8769	34.9022	-0.457862	PNN	pinin, desmosome associated protein
226238_at	8.81e-19	4.46e-20	-10.8723	34.8761	-0.969035	MCEE	methylmalonyl-CoA epimerase
235651_at	8.94e-19	4.53e-20	-10.8696	34.8603	-2.84488	TTC22	tetratricopeptide repeat domain 22
220303_at	9.08e-19	4.6e-20	-10.867	34.8453	-1.1492	PDZD3	PDZ domain containing 3
209689_at	9.09e-19	4.61e-20	-10.8667	34.8434	-0.797818	CCDC93	coiled-coil domain containing 93
226306_at	9.31e-19	4.72e-20	10.8625	34.8194	1.03375	C6orf1	chromosome 6 open reading frame 1
205859_at	9.39e-19	4.77e-20	10.8607	34.8093	1.49713	LY86	lymphocyte antigen 86
208876_s_at	9.4e-19	4.77e-20	10.8606	34.8083	1.20262	PAK2	p21 (RAC1) activated kinase 2
207811_at	9.47e-19	4.81e-20	-10.8592	34.8003	-0.881305	KRT12	keratin 12
210605_s_at	9.48e-19	4.82e-20	10.8589	34.7984	1.47749	MFGE8	milk fat globule-EGF factor 8 protein
1552615_at	9.52e-19	4.84e-20	10.8582	34.7943	0.704563	ACACB	acetyl-CoA carboxylase beta
213148_at	9.73e-19	4.95e-20	-10.8543	34.772	-1.15592	C2orf72	chromosome 2 open reading frame 72
232865_at	9.75e-19	4.96e-20	-10.8538	34.7695	-1.3749	AFF4	AF4/FMR2 family member 4
230252_at	9.77e-19	4.97e-20	-10.8535	34.7675	-1.6171	LPAR5	lysophosphatidic acid receptor 5
213206_at	9.88e-19	5.03e-20	-10.8515	34.7558	-1.04601	GOSR2	golgi SNAP receptor complex member 2
241434_at	9.97e-19	5.08e-20	-10.8497	34.7458	-0.933131	IPP	intracisternal A particle-promoted polypeptide
238049_at	9.99e-19	5.09e-20	-10.8493	34.7435	-1.34674	GRAMD3	GRAM domain containing 3
218364_at	9.99e-19	5.09e-20	-10.8494	34.7438	-0.897184	LRRFIP2	LRR binding FLII interacting protein 2
1554608_at	1e-18	5.12e-20	-10.8482	34.7372	-1.3025	TGOLN2	trans-golgi network protein 2
1558711_at	1.03e-18	5.27e-20	-10.8435	34.7102	-0.814259	FAM13A-AS1	FAM13A antisense RNA 1
210818_s_at	1.03e-18	5.24e-20	10.8444	34.7152	1.0094	GRIK1-AS2///BACH1	GRIK1 antisense RNA 2///BTB domain and CNC homolog 1
211681_s_at	1.03e-18	5.23e-20	10.8446	34.7164	1.24854	PDLIM5	PDZ and LIM domain 5
204815_s_at	1.04e-18	5.3e-20	10.8423	34.7032	0.733787	DHX34	DEAH-box helicase 34
201502_s_at	1.06e-18	5.43e-20	10.8382	34.6795	1.03491	NFKBIA	NFKB inhibitor alpha
230921_s_at	1.11e-18	5.67e-20	10.8307	34.6364	1.0347	MAP3K12	mitogen-activated protein kinase kinase kinase 12
202956_at	1.14e-18	5.85e-20	-10.8254	34.6055	-1.05929	ARFGEF1	ADP ribosylation factor guanine nucleotide exchange factor 1
205456_at	1.14e-18	5.85e-20	10.8254	34.6058	1.48298	CD3E	CD3e molecule
244677_at	1.14e-18	5.82e-20	10.8262	34.6105	2.30906	MIR6883///PER1	microRNA 6883///period circadian clock 1
242317_at	1.15e-18	5.87e-20	-10.8247	34.6015	-1.93233	HIGD1A	HIG1 hypoxia inducible domain family member 1A
203513_at	1.15e-18	5.92e-20	-10.8233	34.5938	-0.930542	SPG11	spastic paraplegia 11 (autosomal recessive)
213897_s_at	1.18e-18	6.06e-20	-10.8192	34.5701	-1.0121	MRPL23	mitochondrial ribosomal protein L23
218618_s_at	1.18e-18	6.08e-20	10.8187	34.5673	1.09504	LOC101928615///FNDC3B	uncharacterized LOC101928615///fibronectin type III domain containing 3B
236933_at	1.19e-18	6.09e-20	-10.8185	34.5657	-0.555805	EVPLL	envoplakin like
204479_at	1.2e-18	6.15e-20	-10.8167	34.5559	-1.12816	OSTF1	osteoclast stimulating factor 1
209162_s_at	1.2e-18	6.17e-20	10.8163	34.5531	1.08914	PRPF4	pre-mRNA processing factor 4
202090_s_at	1.22e-18	6.28e-20	-10.8133	34.5358	-0.680656	UQCR11	ubiquinol-cytochrome c reductase, complex III subunit XI
235591_at	1.23e-18	6.33e-20	-10.8117	34.5268	-4.02461	SSTR1	somatostatin receptor 1
233599_at	1.23e-18	6.34e-20	10.8114	34.5251	1.42216	LOC728061	hCG2003663
230135_at	1.24e-18	6.36e-20	-10.8109	34.5219	-3.0737	HHIP	hedgehog interacting protein
229285_at	1.25e-18	6.47e-20	-10.8081	34.5058	-1.26093	RNASEL	ribonuclease L
209206_at	1.25e-18	6.47e-20	-10.8081	34.5061	-0.916596	LOC102724364///SEC22B	vesicle-trafficking protein SEC22b-like///SEC22 homolog B, vesicle trafficking protein (gene/pseudogene)
227057_at	1.27e-18	6.57e-20	10.8055	34.491	0.980684	ARHGAP27	Rho GTPase activating protein 27
237750_at	1.28e-18	6.6e-20	-10.8046	34.4858	-0.789956	XPNPEP3	X-prolyl aminopeptidase 3
236007_at	1.29e-18	6.67e-20	-10.8028	34.4755	-1.29176	AKAP10	A-kinase anchoring protein 10
202914_s_at	1.32e-18	6.8e-20	10.7994	34.4558	1.05897	ARHGEF11	Rho guanine nucleotide exchange factor 11
209949_at	1.32e-18	6.84e-20	10.7985	34.4508	1.93898	NCF2	neutrophil cytosolic factor 2
217828_at	1.34e-18	6.94e-20	-10.7959	34.4361	-1.0515	SLTM	SAFB like transcription modulator
244508_at	1.34e-18	6.93e-20	10.7961	34.4368	1.4154	2019-09-07	septin 7
242321_at	1.36e-18	7.03e-20	10.7937	34.4234	1.52701	PTPN14	protein tyrosine phosphatase, non-receptor type 14
222240_s_at	1.36e-18	7.03e-20	10.7937	34.4233	1.65395	ISYNA1	inositol-3-phosphate synthase 1
230623_x_at	1.37e-18	7.12e-20	-10.7914	34.4098	-0.690244	USP28	ubiquitin specific peptidase 28
233207_at	1.37e-18	7.11e-20	10.7916	34.4112	0.720729	DISC1	disrupted in schizophrenia 1
1553725_s_at	1.37e-18	7.09e-20	10.7921	34.4142	1.20375	ZNF644	zinc finger protein 644
203635_at	1.39e-18	7.21e-20	-10.7892	34.3975	-0.778262	DSCR3	DSCR3 arrestin fold containing
238427_at	1.4e-18	7.26e-20	10.7881	34.3912	0.853942	GRPEL2	GrpE like 2, mitochondrial
201992_s_at	1.4e-18	7.28e-20	10.7876	34.3879	1.19286	KIF5B	kinesin family member 5B
224852_at	1.44e-18	7.51e-20	-10.7822	34.357	-1.12291	TTC17	tetratricopeptide repeat domain 17
224685_at	1.46e-18	7.61e-20	-10.7801	34.3446	-1.07845	AFDN	afadin, adherens junction formation factor
227712_at	1.46e-18	7.6e-20	-10.7801	34.345	-1.03095	LYRM2	LYR motif containing 2
226786_at	1.46e-18	7.61e-20	10.78	34.3443	0.678236	RFX1	regulatory factor X1
243011_at	1.46e-18	7.61e-20	10.78	34.3443	0.879399	NXPE3	neurexophilin and PC-esterase domain family member 3
1557174_a_at	1.52e-18	7.95e-20	-10.7724	34.3005	-1.17636	IRAK1BP1	interleukin 1 receptor associated kinase 1 binding protein 1
242970_at	1.52e-18	7.92e-20	10.7731	34.3044	0.746728	DIP2B	disco interacting protein 2 homolog B
226825_s_at	1.52e-18	7.95e-20	10.7725	34.3009	0.899246	TMEM165	transmembrane protein 165
239680_at	1.53e-18	8e-20	-10.7714	34.295	-1.23489	WDR76	WD repeat domain 76
223242_s_at	1.59e-18	8.32e-20	-10.7645	34.2552	-0.904287	MFSD11	major facilitator superfamily domain containing 11
230531_at	1.59e-18	8.31e-20	10.7648	34.2569	0.777428	KCNC3	potassium voltage-gated channel subfamily C member 3
240757_at	1.59e-18	8.28e-20	10.7653	34.2599	0.832081	CLASP1	cytoplasmic linker associated protein 1
221844_x_at	1.62e-18	8.49e-20	-10.7612	34.2359	-0.942612	SPCS3	signal peptidase complex subunit 3
209416_s_at	1.62e-18	8.47e-20	10.7615	34.2379	0.652604	FZR1	fizzy/cell division cycle 20 related 1
213023_at	1.62e-18	8.48e-20	10.7614	34.237	1.30595	UTRN	utrophin
238510_at	1.63e-18	8.52e-20	-10.7605	34.2323	-1.0082	ZNF720	zinc finger protein 720
203981_s_at	1.63e-18	8.52e-20	-10.7605	34.2322	-0.584019	ABCD4	ATP binding cassette subfamily D member 4
212374_at	1.63e-18	8.55e-20	10.7599	34.2286	0.785741	FEM1B	fem-1 homolog B
[truncated: 20,187 more rows]
