# Supplementary material for: Global transcriptomic analysis identifies SERPINE1 as a prognostic biomarker associated with epithelial-to-mesenchymal transition in gastric cancer
Source: PeerJ. 2019 Jun 10;7:e7091. doi: 10.7717/peerj.7091 (PMC6563800; doi:10.7717/peerj.7091)
Supplement: Supplemental Information 2 [file peerj-07-7091-s002.xlsx]

## Sheet: Sheet1
ID	adj.P.Val	P.Value	t	B	logFC	GB_LIST	SPOT_ID	RANGE_GB	RANGE_STRAND	RANGE_START
3490655	1.25e-22	5.68e-27	14.8716	50.5378	2.03268	NM_018204,NM_001098525,AY062261	chr13:53029515-53050758	NC_000013.10	+	53029515
3776139	2.1e-20	1.91e-24	13.6316	44.9016	1.86961	NM_006101,BC035617	chr18:2568386-2616629	NC_000018.9	+	2568386
3599811	4.78e-20	6.51e-24	13.3744	43.7093	1.96831	NM_138555,NM_004856,BC051826,AK056793	chr15:69706623-69740754	NC_000015.9	+	69706623
3901361	3.47e-19	7.89e-23	12.8566	41.2855	3.76589	NM_001898,NM_001899,BC021225,BC065714,NM_001322	chr20:23702105-23731882	NC_000020.10	-	23702105
3129149	3.47e-19	7.8e-23	12.859	41.2968	2.37733	NM_018492,BC015191	chr8:27667165-27695496	NC_000008.10	-	27667165
3728964	1.8e-18	4.91e-22	12.4804	39.5063	1.93839	NM_018304,BC008669	chr17:57211021-57284051	NC_000017.10	+	57211021
3901387	6.31e-18	2.28e-21	12.1669	38.0132	2.35946	NM_001322,NM_001899,BC062679,BC074952	chr20:23753677-23807358	NC_000020.10	-	23753677
3354799	6.31e-18	2.29e-21	12.1655	38.0066	1.83436	NM_001114122,NM_001114121,NM_001274,AK292549	chr11:125495375-125546147	NC_000011.9	+	125495375
2364438	8.17e-18	3.34e-21	12.0887	37.6397	1.94703	NM_145697,NM_031423,BC008489	chr1:163291725-163370364	NC_000001.10	+	163291725
2652675	8.96e-18	4.48e-21	12.0291	37.3544	2.00122	NM_018098,AY376439	chr3:172468249-172594633	NC_000003.11	+	172468249
4052881	8.96e-18	4.07e-21	12.0485	37.4473	1.70591	AB096683,BC146978,BC035696,BC137545,BC137546,BC046199,DQ786198,DQ786235	chr1:143887471-143928833	NC_000001.10	-	143887471
3565571	3.62e-17	1.98e-20	11.7281	35.9087	1.69694	NM_007086,NM_001008396,BC063041	chr14:55405608-55494414	NC_000014.8	-	55405608
3756193	1.05e-16	6.18e-20	11.4976	34.7967	2.51303	NM_001067,BC140791,AK123052	chr17:38464071-38593508	NC_000017.10	-	38464071
2379863	1.1e-16	6.98e-20	11.4731	34.6782	1.85347	NM_016343,U19769	chr1:214776548-214921815	NC_000001.10	+	214776548
3565663	1.64e-16	1.12e-19	11.3784	34.2197	2.08366	NM_001146015,NM_014750,AB076695	chr14:55596220-55658471	NC_000014.8	-	55596220
3639031	2.27e-16	1.65e-19	11.3	33.8399	1.92392	NM_003981,NM_199413,NM_199414,BC003138	chr15:91509281-91537946	NC_000015.9	-	91509281
3595979	2.92e-16	2.78e-19	11.1948	33.3295	2.13668	NM_004701,AF087910	chr15:59397216-59417274	NC_000015.9	+	59397216
2813414	2.92e-16	2.71e-19	11.2002	33.356	2.1291	NM_031966,AK289431	chr5:68462706-68474066	NC_000005.9	+	68462706
3775842	2.92e-16	2.35e-19	11.2292	33.4965	1.79354	NM_001071,AB062290	chr18:657560-673715	NC_000018.9	+	657560
3980560	2.92e-16	2.39e-19	11.2254	33.478	1.78541	NM_012310,NM_001099293,AF071592,AK302388	chrX:69509937-69640728	NC_000023.10	+	69509937
2798915	2.92e-16	2.53e-19	11.2141	33.4233	1.77632	NM_004237,NM_001166260,BC019294	chr5:892778-919452	NC_000005.9	+	892778
3590388	3.11e-16	3.11e-19	11.1727	33.2224	1.84665	NM_016359,NM_018454,NM_001129897,AF290612	chr15:41605094-41673240	NC_000015.9	+	41605094
3881443	3.87e-16	4.04e-19	11.1199	32.9659	2.18343	NM_012112,BC004136	chr20:30311094-30389599	NC_000020.10	+	30311094
3258910	4.42e-16	4.82e-19	11.0845	32.7939	1.59012	NM_018063,AF155827,BX538033,AB102723,AB102716,AB113249,AB102717,AB102718,AB102720,AB102722,AB113248,AB102721,AB102719,BC031004,BC030963,BC029381,AK001201,AK022928,BC105606,AK091544	chr10:96305527-96373659	NC_000010.10	+	96305527
3258444	4.87e-16	5.73e-19	11.0499	32.6256	1.83749	NM_018131,NM_001127182,AY788918	chr10:95242739-95319522	NC_000010.10	+	95242739
3504617	4.87e-16	5.75e-19	11.049	32.6212	1.66943	NM_145061,NM_001166017,NM_024026,AF361358	chr13:21727734-21750839	NC_000013.10	-	21727734
2830638	5.14e-16	6.31e-19	11.0305	32.5315	1.60363	NM_005733,NM_004661,BC012999,AF153329,AF070672,AK296879,AF053977,BC017713	chr5:137514390-137524376	NC_000005.9	+	137514390
2710599	5.31e-16	6.76e-19	11.0167	32.4643	2.52228	NM_021101,AF101051	chr3:190000812-190040238	NC_000003.11	-	190000812
3720896	5.47e-16	7.2e-19	11.004	32.4024	2.41892	NM_001254,BC025232	chr17:38443876-38459407	NC_000017.10	+	38443876
2997376	6.69e-16	9.12e-19	10.9566	32.1716	1.93416	NM_018685,BC070066	chr7:36429432-36495492	NC_000007.13	+	36429432
3589697	8.37e-16	1.18e-18	10.9052	31.9214	1.56416	NM_001211,NM_001128628,NM_001128629,AF107297,AK315813	chr15:40447768-40542325	NC_000015.9	+	40447768
3139950	1.25e-15	1.82e-18	10.818	31.4964	1.59449	NM_016027,AF151841,AL833348	chr8:71531614-71581496	NC_000008.10	-	71531614
3607537	1.27e-15	1.9e-18	10.81	31.4572	1.74016	NM_001113378,NM_018193,BC140769	chr15:89817417-89860938	NC_000015.9	+	89817417
3762198	1.54e-15	2.38e-18	10.7643	31.2342	2.31061	NM_000088,Z74615	chr17:48260660-48946677	NC_000017.10	-	48260660
3631964	1.71e-15	2.73e-18	10.7375	31.1038	1.4172	NM_182470,NM_002654,NM_182471,BC007952	chr15:72491419-72524249	NC_000015.9	-	72491419
2720251	2.32e-15	3.79e-18	10.6714	30.7811	1.65932	NM_022346,NM_153686,AF331796,AL133031	chr4:17812535-17846629	NC_000004.11	+	17812535
2411228	2.55e-15	4.29e-18	10.6468	30.6609	1.70094	NM_001048166,NM_003035,BC126223,M74558,BC144089,AK128406	chr1:47715816-47779845	NC_000001.10	-	47715816
3536336	3.18e-15	5.5e-18	10.5973	30.4192	1.93282	NM_005192,NM_001130851,L27711,EF560750,L25876,U02681,BC064965,AY257474,BT019451,AF213041,CR407666,AF213039,AF213046,AF213045,AF213033,AF213036,AF213038,AF213042,AF213047,AF213050,AF213044,AF213048,AF213052,AF213049,AF213053,AF213035,AY257475,AF213040,AF213051,AY257476,AY257477,AF213037,AF213034,AK293265,AY257479,BC103633	chr14:54863586-54886932	NC_000014.8	+	54863586
3151534	3.73e-15	6.61e-18	10.5605	30.2391	1.54636	NM_014109,BC113656	chr8:124323993-124408690	NC_000008.10	-	124323993
3689880	3.88e-15	7.05e-18	10.5476	30.1762	1.65044	NM_024745,NM_198490,BC030699	chr16:46607699-46660241	NC_000016.9	-	46607699
3607510	4.15e-15	7.74e-18	10.529	30.0853	1.92562	NM_001113378,NM_018193,BC004277	chr15:89787177-89811842	NC_000015.9	+	89787177
3394412	5.13e-15	9.79e-18	10.482	29.8556	2.19108	NM_006288,AB209209	chr11:119288108-119317324	NC_000011.9	-	119288108
3485074	9.98e-15	1.95e-17	10.3445	29.1829	1.62191	NM_002915,NM_181558,BC000149	chr13:34392203-34540686	NC_000013.10	+	34392203
3401804	1.24e-14	2.48e-17	10.2967	28.9485	1.86931	NM_001130862,NM_006479,BC016330	chr12:4647955-4669579	NC_000012.11	+	4647955
3258168	1.43e-14	2.93e-17	10.2637	28.7873	1.75265	NM_004523,U37426	chr10:94302971-94415150	NC_000010.10	+	94302971
2584134	1.5e-14	3.14e-17	10.2495	28.7176	2.49935	NM_004460,U09278	chr2:163027200-163101589	NC_000002.11	-	163027200
2398706	2.22e-14	4.74e-17	10.1676	28.3164	1.73656	NM_002403,NM_001135248,NM_017459,NM_001135247,AK222751	chr1:17300738-17308081	NC_000001.10	-	17300738
3333226	2.79e-14	6.09e-17	10.1176	28.0712	1.21182	NM_004111,BC000323,AK299762	chr11:61556353-61593984	NC_000011.9	+	61556353
3150715	2.94e-14	6.54e-17	10.1035	28.0021	1.49192	NM_024094,BC001316	chr8:120846216-120868242	NC_000008.10	-	120846216
2570616	2.98e-14	6.77e-17	10.0965	27.9678	1.68079	NM_004336,AF053305	chr2:111371987-111458479	NC_000002.11	-	111371987
3653072	4.44e-14	1.03e-16	10.0131	27.559	1.60385	NM_005030,AB209179	chr16:23690163-23701679	NC_000016.9	+	23690163
3134034	4.91e-14	1.16e-16	9.9894	27.4428	1.39969	NM_006904,NM_001081640,U47077	chr8:48644241-48872743	NC_000008.10	-	48644241
2378937	5.94e-14	1.46e-16	9.94378	27.2191	1.62281	NM_016448,AF195765	chr1:212208942-212332423	NC_000001.10	+	212208942
3291435	5.94e-14	1.43e-16	9.94733	27.2365	1.50271	NM_145307,AY150309	chr10:63927873-64028781	NC_000010.10	-	63927873
3590014	6.36e-14	1.59e-16	9.92676	27.1356	1.53133	NM_170589,NM_144508,AF173994	chr15:40886218-40956537	NC_000015.9	+	40886218
2687979	6.91e-14	1.76e-16	9.90637	27.0356	1.50993	NM_020890,AF334474	chr3:108267156-108308530	NC_000003.11	-	108267156
2926802	1.04e-13	2.74e-16	9.81782	26.6013	1.96048	NM_001130173,NM_001161656,NM_001161658,NM_005375,NM_001130172,NM_001161657,NM_001161659,NM_001161660,BC064955,M15024,AF104863,AJ606317,AJ606323,AJ606324,AJ606318,AY787455,AY787465,AY787452,M13666,AJ616800	chr6:135502407-135588556	NC_000006.11	+	135502407
3312490	1.04e-13	2.72e-16	9.81955	26.6098	1.70045	NM_002417,NM_001145966,X65550	chr10:129883584-130027208	NC_000010.10	-	129883584
3504193	1.07e-13	2.9e-16	9.80655	26.546	1.46223	NM_004004,M86849	chr13:20761614-20767067	NC_000013.10	-	20761614
3090697	1.07e-13	2.92e-16	9.80562	26.5415	1.28547	NM_152562,AK292505	chr8:25306656-25375503	NC_000008.10	+	25306656
3765580	1.38e-13	3.83e-16	9.75142	26.2757	1.56296	NM_032043,AF360549	chr17:59724012-59940755	NC_000017.10	-	59724012
3239891	1.51e-13	4.26e-16	9.73041	26.1726	1.56825	NM_014317,AB210838	chr10:26973853-27035724	NC_000010.10	+	26973853
3013054	1.63e-13	4.66e-16	9.7123	26.0837	1.92167	NM_000089,BC054498	chr7:93902769-94106103	NC_000007.13	+	93902769
3102372	1.68e-13	4.89e-16	9.70283	26.0373	2.06448	NM_001128205,NM_015170,NM_001128206,NM_001128204,AF545571	chr8:70378869-70573147	NC_000008.10	+	70378869
2417528	1.73e-13	5.1e-16	9.69462	25.997	1.74845	NM_001114120,NM_017779,AB281187	chr1:68939837-68991670	NC_000001.10	-	68939837
3587457	1.88e-13	5.64e-16	9.67445	25.8981	2.01182	NM_014783,NM_199357,NM_001039841,BC039563,BC105788	chr15:32906330-32932130	NC_000015.9	+	32906330
3248289	1.96e-13	5.98e-16	9.66291	25.8415	1.90918	NM_001786,NM_033379,NM_001170406,NM_001170407,BC107750	chr10:62492222-62555197	NC_000010.10	+	62492222
3880827	2.01e-13	6.29e-16	9.65263	25.7911	1.53183	NM_021067,BC012542	chr20:25388321-25433316	NC_000020.10	+	25388321
3167110	2.01e-13	6.23e-16	9.65448	25.8001	1.35977	NR_003573,NM_004039,M62898,D00017	chr9:33624223-33625510	NC_000009.11	+	33624223
3743551	2.4e-13	7.65e-16	9.61382	25.6007	2.68561	NM_001307,NM_001185023,NM_001185022,BC001055	chr17:7162666-7167282	NC_000017.10	-	7162666
3137875	2.6e-13	8.39e-16	9.59538	25.5102	2.07405	NM_003878,BC025025	chr8:63916489-63952198	NC_000008.10	-	63916489
2985781	4.46e-13	1.46e-15	9.48522	24.97	1.86909	NM_003247,BC146676	chr6:169462428-169697057	NC_000006.11	-	169462428
2450345	4.98e-13	1.65e-15	9.46063	24.8494	1.34133	NM_014875,BC113742	chr1:200432464-200590120	NC_000001.10	-	200432464
3046444	5.07e-13	1.7e-15	9.45434	24.8186	2.83125	NM_003014,AF026692	chr7:37941323-38065277	NC_000007.13	-	37941323
2955827	5.6e-13	1.91e-15	9.43177	24.7079	1.88128	NM_001168357,NM_005084,NM_001010870,NM_001168359,BC038452	chr6:46671938-46703420	NC_000006.11	-	46671938
3373845	5.93e-13	2.05e-15	9.41759	24.6384	1.21065	NM_017611,NM_014096,NM_199329,AB028927	chr11:57174432-57195053	NC_000011.9	-	57174432
3252036	8.34e-13	2.99e-15	9.34239	24.2698	1.49349	NM_002658,NM_001145031,BC013575	chr10:75645924-75702078	NC_000010.10	+	75645924
3726934	8.34e-13	3.01e-15	9.34107	24.2634	1.48908	NM_198175,NM_000269,NR_037149,NM_001018136,AF487339	chr17:49209694-49239906	NC_000017.10	+	49209694
2858592	8.34e-13	3.03e-15	9.33942	24.2552	1.40847	NM_018369,NM_001145208,AF303178	chr5:59879634-59996497	NC_000005.9	-	59879634
3802396	8.34e-13	2.99e-15	-9.34226	24.2692	-2.49501	NM_001650,NM_004028,D63412	chr18:24419713-24445774	NC_000018.9	-	24419713
3603436	9.36e-13	3.49e-15	9.31156	24.1187	1.82578	NM_000745,BC033639	chr15:78857902-78886460	NC_000015.9	+	78857902
2388219	9.36e-13	3.48e-15	9.31224	24.122	1.47632	NM_130398,NM_006027,NM_003686,BC007491,AK291291,AF060479,AF091740,AF042282,AF084974	chr1:242005606-242079841	NC_000001.10	+	242005606
2449559	9.81e-13	3.7e-15	9.29978	24.061	1.37861	NM_018136,AF509326	chr1:197053262-197116031	NC_000001.10	-	197053262
3178583	1.04e-12	3.98e-15	9.28524	23.9897	2.10475	NM_001827,BC006458	chr9:91860916-91931722	NC_000009.11	+	91860916
2809245	1.09e-12	4.22e-15	9.27377	23.9336	1.71812	NM_002203	chr5:52285192-52397021	NC_000005.9	+	52285192
2334098	1.17e-12	4.58e-15	9.25741	23.8534	1.49498	NM_006845,BC008764,BC014924,AK300756,AB264115,AK290688,U63743,BT006759,CR450302,AK302267,AY026505,AK124208	chr1:45205510-45233407	NC_000001.10	+	45205510
3528864	1.26e-12	4.96e-15	9.24132	23.7746	1.3197	NM_004995,BC064803	chr14:23305763-23316967	NC_000014.8	+	23305763
2520429	1.28e-12	5.11e-15	9.23534	23.7453	1.45784	NM_001130158,NM_001161819,NM_012223,AB290176	chr2:192110105-192290440	NC_000002.11	+	192110105
3484641	1.32e-12	5.34e-15	9.22677	23.7033	1.29747	NM_000059,U43746	chr13:32889492-32973806	NC_000013.10	+	32889492
3435362	1.62e-12	6.71e-15	9.18106	23.4795	1.41073	NM_014708,BC150278	chr12:123011809-123111789	NC_000012.11	+	123011809
3996667	1.62e-12	6.64e-15	9.18326	23.4902	1.26633	NM_001363,NM_001142463,NR_002969,NR_002984,BC009928,AF067008,BC010015,U59151,NR_003705	chrX:153991049-154005956	NC_000023.10	+	153991049
2519577	1.67e-12	6.99e-15	9.17288	23.4394	1.96112	NM_000090,BC028178	chr2:189764686-189877630	NC_000002.11	+	189764686
3108489	1.79e-12	7.57e-15	9.15699	23.3616	1.32367	NM_018407,BC038117	chr8:98787299-98869605	NC_000008.10	+	98787299
3598721	1.9e-12	8.1e-15	9.14363	23.2962	1.50502	NR_003105,NM_017975,BX640701,AK090598	chr15:66797431-66866418	NC_000015.9	+	66797431
3007960	1.96e-12	8.45e-15	9.13516	23.2547	2.42114	NM_001305,AK126462	chr7:73242074-73247004	NC_000007.13	+	73242074
3936913	2e-12	8.74e-15	9.12842	23.2217	1.26531	NM_001178010,NM_003504,NM_001178011,AK293338,AF081535,BC006232,BC010022,AY358971,AF053074,AK293123,AF062495,CT841513,BT006792,AK303274,AK302590	chr22:19466081-19508120	NC_000022.10	+	19466081
3995633	2.16e-12	9.53e-15	9.11118	23.1374	1.74641	NM_001711,BC004244,BC002416,J04599,AK293289,AK291955,BT007323,AK297966,AK298756,AK293268,AK094059	chrX:152757927-152775338	NC_000023.10	+	152757927
3250863	2.18e-12	9.69e-15	9.1077	23.1203	1.15633	NM_003901,BC052991,AF144638,BC051238,AK314615,AK308610	chr10:72575716-72640930	NC_000010.10	+	72575716
3976341	2.37e-12	1.07e-14	9.08885	23.0281	1.97013	NM_003254,AK296116	chrX:47441710-47448034	NC_000023.10	+	47441710
3124537	2.7e-12	1.22e-14	9.06105	22.8921	1.48416	NM_147780,NM_147781,NM_147782,NM_147783,NM_001908,BC095408	chr8:11699652-11737509	NC_000008.10	-	11699652
3340269	2.8e-12	1.28e-14	9.05155	22.8456	1.31496	NM_006591,BC108909	chr11:74282131-74380386	NC_000011.9	+	74282131
3440598	2.94e-12	1.36e-14	9.03998	22.789	1.40465	NM_202002,NM_021953,NM_202003,U74612	chr12:2965946-2986303	NC_000012.11	-	2965946
2914777	3.08e-12	1.44e-14	9.02888	22.7347	1.49541	NM_003318,NM_001166691,BC032858	chr6:80713872-80767190	NC_000006.11	+	80713872
3409605	3.1e-12	1.48e-14	9.02374	22.7096	1.74753	NM_018099,BC022267	chr12:29302034-29495964	NC_000012.11	+	29302034
2413423	3.1e-12	1.47e-14	9.02399	22.7108	1.30478	NM_018087,NM_001168551,NR_033142,BC003082,AK295000,DQ141696,AK302910,AK298909	chr1:54203342-54304255	NC_000001.10	-	54203342
2451200	3.14e-12	1.51e-14	9.01929	22.6878	1.48263	NM_014176,AF160215	chr1:202300797-202311212	NC_000001.10	-	202300797
3604147	3.43e-12	1.68e-14	8.99812	22.5842	1.89038	NM_018689,AB103330	chr15:81071712-81244097	NC_000015.9	+	81071712
3911217	3.43e-12	1.7e-14	8.99601	22.5739	1.38727	NM_020182,NM_199169,NM_199170,NM_199171,AF305616	chr20:56223471-56347717	NC_000020.10	-	56223471
3061997	3.43e-12	1.7e-14	8.99561	22.572	1.28475	NM_000305,NM_001018161,AK301313	chr7:95033319-95064411	NC_000007.13	-	95033319
2395490	3.65e-12	1.82e-14	8.98159	22.5034	1.48925	NM_001428,GU170215	chr1:8898755-8941139	NC_000001.10	-	8898755
3322775	3.68e-12	1.86e-14	8.97807	22.4862	1.10559	NM_001165414,NM_005566,NM_001135239,NM_001165416,NR_028500,NM_001165415,AK298834,BC067223,AK296667,AK296089,CR456775,AY423727,CR541714	chr11:18415955-18429952	NC_000011.9	+	18415955
2591643	3.87e-12	1.97e-14	8.96606	22.4275	1.46113	NM_000393,BC086874	chr2:189896622-190090018	NC_000002.11	-	189896622
2585933	4.14e-12	2.12e-14	8.95118	22.3547	1.44731	NM_020675,AK291093	chr2:169727407-169769861	NC_000002.11	-	169727407
3168508	4.15e-12	2.17e-14	8.9471	22.3348	1.57536	NM_014791,BC014039	chr9:36572870-36897829	NC_000009.11	+	36572870
2859667	4.15e-12	2.16e-14	8.94773	22.3379	1.53283	NM_022145,BC008504	chr5:64776155-64859318	NC_000005.9	-	64776155
2961177	4.43e-12	2.34e-14	8.93219	22.2619	1.78482	NM_004370,NM_080645,BC146868	chr6:75793923-75915637	NC_000006.11	-	75793923
2662623	4.49e-12	2.39e-14	-8.92764	22.2397	-2.46011	NR_024138,NR_024135,NR_024132,NR_024137,NR_024133,NR_024134,NR_024136,NM_016362,NM_001134941,NM_001134944,NM_001134945,NM_001134946,EU072087	chr3:10324566-10334749	NC_000003.11	-	10324566
3388830	4.71e-12	2.53e-14	8.91634	22.1845	2.24296	NM_002422,AK223291	chr11:102677769-102714353	NC_000011.9	-	102677769
3182781	4.95e-12	2.68e-14	8.90478	22.128	1.40874	NM_001042550,NM_001042551,NM_006444,AK292599	chr9:106856541-106937667	NC_000009.11	+	106856541
3758317	4.97e-12	2.73e-14	8.90065	22.1078	1.30338	NM_007300,NM_007294,NR_027676,NM_007297,NM_007298,NM_007299,U14680,BC115037,AF005068,BC072418,U64805,AK293762,AY354539,DQ363751,DQ333386,DQ333387,BC114511,BC106746,BC115036,AK308084	chr17:41196315-41322094	NC_000017.10	-	41196315
3385769	4.97e-12	2.71e-14	8.90259	22.1173	1.19211	NM_001814,NM_148170,NM_001114173,AF234263,AK292117,AK296190,AF525032,AF525033,BX537913,AF234264,AF254757,BC100891,BC100892,BC100893,BC100894,BC109386,BC110071,BC054028,BC113897,BC113850	chr11:88026773-88090951	NC_000011.9	-	88026773
3758510	5.61e-12	3.11e-14	8.87484	21.9818	1.52781	NM_001986,NM_001079675,BC016623	chr17:41605216-41623702	NC_000017.10	-	41605216
2443952	6.46e-12	3.61e-14	-8.84505	21.8363	-1.94041	NM_000261,FJ237046	chr1:171604559-171621841	NC_000001.10	-	171604559
3097152	6.55e-12	3.69e-14	8.84073	21.8152	1.18658	NM_005914,NM_182746,AK296913	chr8:48872355-48890867	NC_000008.10	+	48872355
3388673	9.48e-12	5.41e-14	8.76423	21.4419	2.54995	NM_002423,BC003635	chr11:102391273-102401478	NC_000011.9	-	102391273
3667281	9.48e-12	5.43e-14	8.76354	21.4386	1.10774	NM_012426,BC068974	chr16:70557711-70611571	NC_000016.9	+	70557711
2455933	1.06e-11	6.09e-14	-8.74045	21.3259	-2.1221	NR_024099,NM_206594,NM_001134285,NM_001438,NM_206595,BC064700	chr1:216676599-217391652	NC_000001.10	-	216676599
3909354	1.1e-11	6.38e-14	8.73103	21.28	1.17526	NM_015339,NM_181442,BC090933	chr20:49505473-49548715	NC_000020.10	-	49505473
3493391	1.14e-11	6.7e-14	8.72146	21.2333	1.17242	NM_024808,NM_014953,NM_001128226,BX648605	chr13:73181470-73331350	NC_000013.10	+	73181470
2469252	1.2e-11	7.08e-14	8.71026	21.1787	2.21598	NM_001165931,NM_001034,S40301	chr2:10262531-10362027	NC_000002.11	+	10262531
2840002	1.23e-11	7.34e-14	8.70319	21.1443	1.39118	NM_017785,BC012568	chr5:169010377-169037161	NC_000005.9	+	169010377
3368520	1.32e-11	7.91e-14	8.68805	21.0705	1.14775	NM_001326,NM_001033506,NM_001033505,BC108319,AK021448	chr11:33098472-33211923	NC_000011.9	-	33098472
3984655	1.36e-11	8.35e-14	8.67727	21.018	1.36864	NM_006733,AK302986,BC012462	chrX:100351960-100420241	NC_000023.10	+	100351960
2650199	1.36e-11	8.25e-14	8.67972	21.0299	1.26341	NM_005496,NM_001002800,NR_029663,NR_029525,AB019987	chr3:160114490-160152737	NC_000003.11	+	160114490
3268669	1.36e-11	8.3e-14	8.67854	21.0242	1.16766	NM_004725,NM_001007793,AF047472	chr10:124913894-125072636	NC_000010.10	+	124913894
2827185	1.4e-11	8.64e-14	8.67045	20.9848	1.26863	NM_005573,NM_001198557,BC012295,AK056553	chr5:126112328-126184349	NC_000005.9	+	126112328
3056292	1.51e-11	9.39e-14	8.65371	20.9032	1.46518	NM_001306,BC016056	chr7:73183329-73184685	NC_000007.13	-	73183329
3910785	1.58e-11	9.9e-14	8.64318	20.8519	1.41772	NM_198433,NM_003600,NM_198434,NM_198436,NM_198435,NM_198437,AF011468,BC027464,BC006423,BC001280,BC002499,AK301769,AF008551,D84212	chr20:54944448-54969146	NC_000020.10	-	54944448
3421177	1.64e-11	1.04e-13	8.63243	20.7996	1.53331	NM_020401,AK302773	chr12:69080731-69136758	NC_000012.11	+	69080731
3904566	1.64e-11	1.04e-13	8.63228	20.7988	1.23923	NM_001145316,NM_024918,NM_001145315,NM_001145318,NM_001145317,AK290738	chr20:35380198-35475450	NC_000020.10	-	35380198
3235789	1.66e-11	1.06e-13	8.62859	20.7809	1.29493	NM_182751,NM_018518,AB042719	chr10:13203581-13253095	NC_000010.10	+	13203581
3047581	1.79e-11	1.15e-13	8.61277	20.7038	1.61266	NM_002192,BC007858	chr7:41728352-41742686	NC_000007.13	-	41728352
2829947	1.95e-11	1.26e-13	8.59409	20.6129	1.48628	NM_000358,BC000097,M77349,BC004972,BT009820,AK303643,AK298603,AK094581,AB209598	chr5:135364645-135430466	NC_000005.9	+	135364645
3824471	1.96e-11	1.28e-13	8.5908	20.5969	1.04529	NM_024656,BC108308	chr19:17666413-17693965	NC_000019.9	+	17666413
2882098	1.98e-11	1.3e-13	8.58805	20.5835	1.69286	NM_003118,BC072457	chr5:150972476-151069618	NC_000005.9	-	150972476
3148796	2.01e-11	1.34e-13	8.58177	20.553	1.34869	NM_001128211,NM_032869,BC043406	chr8:110253148-110346758	NC_000008.10	-	110253148
3716893	2.01e-11	1.34e-13	8.58246	20.5563	1.33424	NM_024857,AY557611	chr17:29158998-29222866	NC_000017.10	+	29158998
3736290	2.19e-11	1.47e-13	8.56348	20.464	1.22317	NM_001168,NM_001012271,NM_001012270,BC034148	chr17:76210287-76221716	NC_000017.10	+	76210287
2946219	2.39e-11	1.62e-13	8.54417	20.3701	2.03925	NM_003513,BC125140	chr6:26033330-26033842	NC_000006.11	-	26033330
3417146	2.48e-11	1.69e-13	8.53609	20.3308	1.11521	NM_001798,NM_052827,BC003065	chr12:56360559-56366564	NC_000012.11	+	56360559
3405587	2.52e-11	1.73e-13	8.53111	20.3065	1.67766	NM_003979,AK122672	chr12:13037744-13095221	NC_000012.11	+	13037744
3023835	2.62e-11	1.81e-13	-8.52228	20.2636	-3.53757	NM_001869,BT007403	chr7:129858758-129929633	NC_000007.13	+	129858758
2735027	2.79e-11	1.94e-13	8.50802	20.1943	2.407	NM_001040058,NM_000582,NM_001040060,AK295491	chr4:88408243-88904561	NC_000004.11	+	88408243
3590086	3.71e-11	2.6e-13	8.44942	19.9097	1.26499	NM_002875,NM_133487,NM_001164269,NM_001164270,D14134,AK291969,D13804,EU362635,CR536559,BT019705,BC001459,AK303089,AY425955	chr15:40987369-41024524	NC_000015.9	+	40987369
2901913	3.84e-11	2.7e-13	8.4416	19.8717	1.27595	NM_178014,AB062393,BC007605,BC021909,BC013374,BC019924,AK316316,AK302314,AF141349,AF070600,AF070561,AF070593,BC103746,BC005838,BC001938,BC002347,BC070326,BC020946,AK298889,AK316265,AK297638,BC062532,AK297489,DQ457058,AK303227,AK302195,AK098772	chr6:30687998-30693186	NC_000006.11	+	30687998
3886223	4.3e-11	3.05e-13	8.41735	19.754	1.26968	NM_002466,BC007585	chr20:42294384-42345118	NC_000020.10	+	42294384
3888133	4.33e-11	3.09e-13	8.41452	19.7402	1.34859	NM_001316,AF053641	chr20:47662806-47713586	NC_000020.10	+	47662806
3290210	4.43e-11	3.18e-13	8.40853	19.7112	1.31105	NM_032997,NM_007057,NM_001005413,AK093808	chr10:58083859-58121120	NC_000010.10	-	58083859
3601229	4.85e-11	3.5e-13	8.38926	19.6177	0.981816	NM_001024736,NM_025240,AK291721	chr15:73976632-74020485	NC_000015.9	+	73976632
3428268	5.7e-11	4.15e-13	8.3554	19.4535	1.47554	NM_174942,NM_002641,NR_033835,BC043366,BC038236	chr12:100967489-101022064	NC_000012.11	+	100967489
2781138	6.12e-11	4.48e-13	8.3399	19.3784	1.34661	NM_016269,NM_001130713,NM_001130714,NM_001166119,AF288571	chr4:108967002-109128678	NC_000004.11	-	108967002
3342426	6.47e-11	4.76e-13	8.32745	19.3181	1.37034	NM_145018,AK058145	chr11:82612750-82669346	NC_000011.9	+	82612750
2665572	7.07e-11	5.24e-13	8.30836	19.2256	1.44335	NM_001012410,NM_001012409,NM_001012412,NM_001012411,NM_138484,NM_001012413,AB187578	chr3:20202085-20240525	NC_000003.11	-	20202085
3904747	7.33e-11	5.46e-13	8.29979	19.1841	1.21415	NM_002895,NM_183404,AK290380	chr20:35624760-35724406	NC_000020.10	-	35624760
3231774	7.54e-11	5.65e-13	8.29297	19.1511	1.10562	NM_012341,AK301721,BC040651	chr10:952450-1065862	NC_000010.10	+	952450
3750785	7.8e-11	5.88e-13	8.28489	19.112	1.24743	NM_006461,AF399910,AK316079	chr17:26904592-26926297	NC_000017.10	-	26904592
3629103	7.84e-11	5.95e-13	8.28265	19.1012	1.90061	NM_014736,NM_001029989,BC005832,AK301858	chr15:64651313-64679863	NC_000015.9	-	64651313
3619945	8.04e-11	6.13e-13	8.27643	19.071	1.17216	NM_007280,BC015050	chr15:41601471-41624831	NC_000015.9	-	41601471
2980241	8.16e-11	6.26e-13	8.27221	19.0506	1.29159	NM_012177,NM_001142522,AJ420499	chr6:153291677-153304733	NC_000006.11	-	153291677
2946215	8.26e-11	6.38e-13	8.2686	19.0332	2.07184	NM_003537,BC096133	chr6:26031827-26032323	NC_000006.11	-	26031827
2494484	8.75e-11	6.8e-13	8.25565	18.9705	1.30452	NM_015341,BC024211	chr2:96994983-97118176	NC_000002.11	+	96994983
2781387	8.99e-11	7.03e-13	-8.24902	18.9384	-1.59377	NM_031279,NM_001146590,NR_027474,NM_001146627,NR_027475,BC022526	chr4:109627673-109684209	NC_000004.11	-	109627673
2365210	9.31e-11	7.32e-13	8.24088	18.8991	1.05419	NM_012474,BC002906	chr1:165796788-166059442	NC_000001.10	+	165796788
3416895	9.41e-11	7.44e-13	8.23753	18.8829	1.28453	NM_152637,AY358508	chr12:56075419-56078392	NC_000012.11	+	56075419
3277751	9.97e-11	7.93e-13	8.22465	18.8206	1.17685	NM_014142,BC000025,AK291131,AF155832,AF218818,CR457195,AK123731,CR611074	chr10:12206856-12238143	NC_000010.10	-	12206856
3299585	1.07e-10	8.54e-13	8.20958	18.7477	1.33377	NM_001127605,NM_000235,BC012287	chr10:90973341-91174372	NC_000010.10	-	90973341
2441043	1.11e-10	8.92e-13	8.20088	18.7057	1.31072	NM_015441,BC067274	chr1:161942357-161993648	NC_000001.10	-	161942357
2460296	1.13e-10	9.1e-13	8.19679	18.6859	1.49405	NM_000029,K02215	chr1:230838312-230931219	NC_000001.10	-	230838312
2784113	1.15e-10	9.35e-13	8.19126	18.6592	1.42201	NM_001237,AK291931	chr4:122736885-122745066	NC_000004.11	-	122736885
2618940	1.21e-10	9.85e-13	8.18074	18.6084	1.2985	NM_001904,NM_001098209,NM_001098210,BC058926	chr3:41236352-41281930	NC_000003.11	+	41236352
3388859	1.23e-10	1.01e-12	8.17626	18.5867	2.43916	NM_002426,BC112301	chr11:102733467-102751686	NC_000011.9	-	102733467
3919101	1.3e-10	1.07e-12	-8.16385	18.5268	-2.92756	NM_172201,AF302095	chr21:35702581-35743668	NC_000021.8	+	35702581
3859832	1.36e-10	1.13e-12	-8.1534	18.4764	-3.41205	NM_000704,AK223259	chr19:36040942-36068256	NC_000019.9	-	36040942
3257338	1.41e-10	1.18e-12	8.14474	18.4346	1.36012	NM_016195,AB033337	chr10:91445760-91534690	NC_000010.10	+	91445760
3759356	1.48e-10	1.24e-12	8.13386	18.3821	1.13525	NM_004247,NM_001142605,AK128148	chr17:42918254-42976819	NC_000017.10	-	42918254
3318009	1.55e-10	1.31e-12	8.12375	18.3333	1.07461	NM_001033,BC006498	chr11:4116011-4160098	NC_000011.9	+	4116011
2402459	1.58e-10	1.34e-12	8.11809	18.306	1.11421	NM_203401,NM_005563,NM_203399,NM_001145454,BX647885	chr1:26226552-26267337	NC_000001.10	-	26226552
3367338	1.82e-10	1.56e-12	8.08799	18.1608	1.2582	NM_031217,AY791349	chr11:27955514-28129784	NC_000011.9	-	27955514
3442322	1.82e-10	1.56e-12	8.08808	18.1613	1.19013	NM_031299,BC036512	chr12:6953970-6961221	NC_000012.11	-	6953970
3421630	1.85e-10	1.59e-12	8.08351	18.1393	1.38612	NM_006431,AK294307	chr12:69979241-69995345	NC_000012.11	+	69979241
3215560	1.92e-10	1.67e-12	-8.07455	18.0961	-1.89186	NM_003837,BC113632	chr9:97321002-97356094	NC_000009.11	-	97321002
4005859	1.99e-10	1.74e-12	8.06597	18.0547	1.21449	NM_003688,NM_001126054,NM_001126055,NM_145690,NM_001135699,NM_001135700,NM_001135702,AF032119,AY705392,AF035582,BC117311,BC143454,BC143456,AB039327,AK313399,BC029936,CR611825	chrX:41334983-41783307	NC_000023.10	-	41334983
3329343	2.01e-10	1.76e-12	8.06324	18.0416	1.29299	NM_001012334,NM_001012333,NM_002391,BC011704	chr11:46402356-46405348	NC_000011.9	+	46402356
2324919	2.3e-10	2.02e-12	8.03507	17.9059	1.36622	NM_017449,NM_004442,AF025304	chr1:23037304-23270581	NC_000001.10	+	23037304
2838656	2.38e-10	2.1e-12	8.02725	17.8683	1.36373	NM_001142556,NM_012484,NM_012485,NM_001142557,AF032862	chr5:162886904-162918937	NC_000005.9	+	162886904
3454223	2.46e-10	2.19e-12	8.01945	17.8307	1.14349	NM_013277,NM_001126103,NM_001126104,NR_026583,AB030251	chr12:50370735-50419270	NC_000012.11	-	50370735
2595443	2.5e-10	2.23e-12	8.01518	17.8102	1.05661	NM_018256,EF011617	chr2:203739001-203879501	NC_000002.11	-	203739001
2694123	2.62e-10	2.35e-12	8.00461	17.7593	1.04405	NM_003707,Y18418	chr3:127783625-127872747	NC_000003.11	-	127783625
3505937	2.67e-10	2.41e-12	7.99956	17.735	1.12473	NM_018451,BC113111	chr13:25456432-25513990	NC_000013.10	-	25456432
2451593	2.71e-10	2.47e-12	7.99452	17.7108	1.81797	NM_001276,AB209459	chr1:203147930-203155877	NC_000001.10	-	203147930
3374874	2.71e-10	2.47e-12	-7.99443	17.7104	-4.14612	NM_005142,BC037958	chr11:59596746-59613010	NC_000011.9	-	59596746
2816459	2.72e-10	2.49e-12	7.99282	17.7026	1.24526	NM_001992,BC002464	chr5:76011786-76038515	NC_000005.9	+	76011786
3788049	2.73e-10	2.52e-12	7.99063	17.6921	0.950996	NM_001039535,NM_145060,BC015706	chr18:47868125-47956468	NC_000018.9	+	47868125
2818517	2.74e-10	2.54e-12	7.98925	17.6854	1.54237	NM_004385,NM_001164097,NM_001164098,NM_001126336,U16306	chr5:82742386-82905060	NC_000005.9	+	82742386
3593575	2.85e-10	2.67e-12	7.97915	17.6369	1.64025	NM_003645,NM_001159629,AF096290	chr15:50473663-50528570	NC_000015.9	+	50473663
3371719	2.85e-10	2.67e-12	7.9792	17.6371	1.24148	NM_001008938,NM_014756,NR_003056,BC120870,BC120869,BC035554,BC017856,AK092678	chr11:46764674-46868084	NC_000011.9	-	46764674
3719962	2.93e-10	2.75e-12	7.97268	17.6058	1.25323	NM_002795,BC013008	chr17:36908986-36920518	NC_000017.10	+	36908986
2605321	2.97e-10	2.8e-12	7.96908	17.5885	1.57909	NM_004369,NM_057167,NM_057166,NM_057165,NM_057164,BC171790,BC144595,BC150625,AK303290,AK304870,BX641155,BX647361,S49432	chr2:238232350-238354929	NC_000002.11	-	238232350
3887117	3.07e-10	2.93e-12	7.96027	17.5461	1.29033	NM_001127695,NM_000308,NM_001167594,AK172808	chr20:44519105-44527737	NC_000020.10	+	44519105
3146103	3.07e-10	2.93e-12	7.96013	17.5455	1.22603	NM_006281,BC010640	chr8:99413631-99953722	NC_000008.10	-	99413631
3388807	3.2e-10	3.07e-12	7.95069	17.5001	2.39608	NM_002421,NM_001145938,M13509	chr11:102660658-102668894	NC_000011.9	-	102660658
3998766	3.23e-10	3.11e-12	7.94774	17.486	1.14192	NM_000216,M97252	chrX:8488039-8731489	NC_000023.10	-	8488039
2838201	3.48e-10	3.37e-12	7.93155	17.4082	1.45463	NM_004219,AJ223953,NR_002734	chr5:159848834-159890894	NC_000005.9	+	159848834
2728189	3.7e-10	3.6e-12	7.91846	17.3453	1.23234	NM_001079525,NM_001079524,NM_006452,BC010273	chr4:57301941-57330744	NC_000004.11	+	57301941
3063685	3.79e-10	3.7e-12	7.91241	17.3163	1.11437	NM_005916,NM_182776,NR_029831,NR_029498,NR_029510,AK226175	chr7:99690102-99699427	NC_000007.13	-	99690102
3929721	3.94e-10	3.86e-12	7.90387	17.2753	1.0566	NM_000819,NM_001136005,NM_001136006,NM_175085,BC107712	chr21:34875511-34915175	NC_000021.8	-	34875511
2797393	4.08e-10	4.02e-12	7.89575	17.2364	1.13369	NM_005245,BC016998,EF139845,AK307938	chr4:187508976-187648054	NC_000004.11	-	187508976
2370123	4.19e-10	4.15e-12	7.88955	17.2066	1.13419	NM_004736,NM_001135669,AF089744	chr1:180601137-180860290	NC_000001.10	+	180601137
3122489	4.31e-10	4.29e-12	7.88261	17.1734	1.44809	NM_001147,NM_001118887,NM_001118888,AF004327	chr8:6359110-6443003	NC_000008.10	-	6359110
3984468	4.32e-10	4.32e-12	7.88112	17.1662	1.40762	NM_014467,AF393649	chrX:99899192-99926824	NC_000023.10	+	99899192
3334224	4.61e-10	4.63e-12	7.86724	17.0997	1.18918	NM_006819,BC039299	chr11:63952765-63972010	NC_000011.9	+	63952765
3779756	4.69e-10	4.73e-12	7.86282	17.0785	1.0248	NM_031216,NM_001013437,BC012430	chr18:12896655-12991306	NC_000018.9	+	12896655
3903481	5.25e-10	5.32e-12	7.83896	16.9642	1.10792	NM_080476,AY422169	chr20:33148351-33265079	NC_000020.10	-	33148351
2436143	5.35e-10	5.45e-12	7.83401	16.9404	1.08367		control		---	0
3402571	5.39e-10	5.51e-12	7.83175	16.9297	1.12004	NM_014865,NR_004387,D63880,AK074754	chr12:6602555-6641120	NC_000012.11	+	6602555
3824874	5.46e-10	5.61e-12	7.82814	16.9124	1.50918	NM_006332,AK123477	chr19:18284526-18289138	NC_000019.9	+	18284526
2463864	5.47e-10	5.64e-12	7.82686	16.9062	1.39296	NM_014812,NM_001042404,NM_001042405,NR_003135,AB022657	chr1:243287741-243418613	NC_000001.10	-	243287741
3014714	5.68e-10	5.89e-12	7.8182	16.8648	1.28028	NM_005720,AF006084	chr7:98971875-98992402	NC_000007.13	+	98971875
2333136	6.06e-10	6.3e-12	7.80421	16.7978	1.66855	NM_001255,U05340	chr1:43824593-43828844	NC_000001.10	+	43824593
2332711	6.09e-10	6.36e-12	7.80229	16.7886	0.900367	NM_006347,BC003412	chr1:43124058-43147325	NC_000001.10	+	43124058
2404999	6.47e-10	6.79e-12	7.78903	16.7252	0.917928	NM_023009,BC007904	chr1:32798728-32801855	NC_000001.10	-	32798728
2438125	6.8e-10	7.17e-12	7.77796	16.6723	0.999391	NR_036564,NR_036565,NM_005998,NM_001008800,AK300765	chr1:156278763-156337644	NC_000001.10	-	156278763
3875195	6.91e-10	7.31e-12	7.77395	16.6531	1.37039	NM_032485,NM_182802,BC101057	chr20:5931298-5976910	NC_000020.10	+	5931298
3891278	7.12e-10	7.57e-12	7.76697	16.6197	1.15858	NM_198976,AK293410	chr20:57555821-57571779	NC_000020.10	+	57555821
3874438	7.31e-10	7.8e-12	7.76077	16.5901	1.04833	NM_021873,NM_004358,NM_021872,BC051711	chr20:3767655-3786756	NC_000020.10	+	3767655
3250055	7.43e-10	7.97e-12	7.75651	16.5697	1.21225	NM_004728,BX648405	chr10:70710578-70744815	NC_000010.10	+	70710578
3890555	7.74e-10	8.34e-12	7.74725	16.5255	1.2214	NM_003610,NM_001015885,AK292247,BC103754,AY349350,BC106923,BC106924,U84720,AY336091,AK126024,AK055170,AK309069	chr20:55926086-55953585	NC_000020.10	+	55926086
3894995	7.76e-10	8.39e-12	7.746	16.5195	1.07575	NM_003091,NM_198216,BC080516,AK301034,J04564,AK301206,CR456969,AY742712,AK307093,AK307266	chr20:2421715-2451499	NC_000020.10	-	2421715
3261492	7.89e-10	8.61e-12	7.74069	16.4942	1.147	NM_004741,BC006769	chr10:103911972-103923607	NC_000010.10	+	103911972
3217807	7.89e-10	8.6e-12	7.74076	16.4945	1.10184	NM_017746,NM_001161584,AB060968	chr9:103064376-103115650	NC_000009.11	-	103064376
3525313	7.92e-10	8.71e-12	7.73827	16.4826	1.17943	NM_001845,BC151220	chr13:110801320-110964518	NC_000013.10	-	110801320
3431483	7.92e-10	8.7e-12	7.73844	16.4834	1.06086	NM_170665,NM_001135765,NM_001681,M23115	chr12:110718949-110868112	NC_000012.11	+	110718949
2853768	8.01e-10	8.84e-12	7.7352	16.468	1.1581	NM_153485,NM_004298,BC039257	chr5:37289957-37371259	NC_000005.9	-	37289957
3866785	8.1e-10	8.97e-12	-7.73218	16.4535	-1.72802	NM_003167,AK289380	chr19:48373723-48389634	NC_000019.9	-	48373723
3031624	8.24e-10	9.18e-12	7.72764	16.4319	1.29541	NM_018487,AK123468	chr7:150490069-150533807	NC_000007.13	+	150490069
2577896	8.45e-10	9.44e-12	7.7218	16.404	1.09886	NM_005915,BC032374	chr2:136597199-136634294	NC_000002.11	-	136597199
2922972	9.3e-10	1.04e-11	7.70142	16.3067	1.11764	NM_173674,BC035671,AJ420528,AJ420597,AK095973,AK098194,AB209385,CR749448	chr6:117775034-117891021	NC_000006.11	+	117775034
3394660	9.58e-10	1.08e-11	7.69429	16.2727	1.68512	NM_012101,L24203	chr11:119982011-120008863	NC_000011.9	-	119982011
3016177	9.58e-10	1.08e-11	7.69373	16.27	0.873257	NM_001283,AB015319	chr7:100797706-100805215	NC_000007.13	+	100797706
3970476	9.74e-10	1.11e-11	7.6895	16.2499	1.25691	NM_001037540,NM_006746,NM_001037535,NM_001037536,BX647757	chrX:17754576-17773104	NC_000023.10	+	17754576
2991860	9.81e-10	1.12e-11	7.68717	16.2387	1.24939	NM_002214,M73780	chr7:20370348-20504280	NC_000007.13	+	20370348
2894663	1.08e-09	1.23e-11	7.6675	16.145	1.10441	NM_017906,AF283303	chr6:10691030-10709969	NC_000006.11	+	10691030
2462456	1.09e-09	1.26e-11	7.66308	16.1239	1.05479	NM_018072,BC150614	chr1:236703401-236746496	NC_000001.10	-	236703401
3497659	1.17e-09	1.35e-11	7.64883	16.0561	1.16555	NM_021033,BC041333	chr13:98064661-98120587	NC_000013.10	+	98064661
4021341	1.19e-09	1.37e-11	7.64498	16.0377	1.04431	NM_016032,NM_001008222,AY952881,AY358558,BC006200,BC003128,BC012826,BC000035,AF151847	chrX:128931428-128977964	NC_000023.10	-	128931428
3468261	1.26e-09	1.47e-11	7.63164	15.9742	1.22948	NM_024057,BC000861	chr12:102466882-102513901	NC_000012.11	-	102466882
3781082	1.31e-09	1.53e-11	7.62354	15.9357	1.24322	NM_006938,J03798	chr18:19180221-19251516	NC_000018.9	+	19180221
3428845	1.31e-09	1.53e-11	7.6226	15.9312	1.08949	NM_017915,AK302724,AK303571,BC098313,AK300041,AF274940,BC018903,BC050696,BC030962	chr12:102513976-102591291	NC_000012.11	+	102513976
3114365	1.4e-09	1.65e-11	7.60709	15.8574	1.3597	NM_144963,DQ228141,AB007962	chr8:124789505-124825082	NC_000008.10	+	124789505
3340589	1.4e-09	1.65e-11	7.6079	15.8613	1.29517	NM_001235,AK122936	chr11:75260734-75283816	NC_000011.9	+	75260734
2620256	1.4e-09	1.66e-11	7.60596	15.852	1.16467	NM_020242,AB035898,BC117174,AK027816,AK098533	chr3:44803264-44894745	NC_000003.11	+	44803264
3821908	1.43e-09	1.7e-11	7.60122	15.8295	0.879384	NM_006397,AY363912	chr19:12912886-12924462	NC_000019.9	+	12912886
3717635	1.44e-09	1.72e-11	7.59965	15.822	0.990416	NM_001098507,NM_003457,NM_001032293,NR_030362,AF046001	chr17:30677046-30735316	NC_000017.10	+	30677046
3300597	1.5e-09	1.8e-11	7.59029	15.7775	1.30013	NM_013451,NM_133337,AF182316	chr10:95047461-95242146	NC_000010.10	-	95047461
3120443	1.5e-09	1.81e-11	7.58871	15.77	0.886118	NM_024531,AK021918	chr8:145582225-145584927	NC_000008.10	+	145582225
3703112	1.54e-09	1.86e-11	7.583	15.7429	1.22824	NM_016095,AK091519	chr16:85709824-85723659	NC_000016.9	-	85709824
3694657	1.55e-09	1.88e-11	7.58094	15.7331	1.269	NM_001797,D21255	chr16:64977664-65156392	NC_000016.9	-	64977664
3523881	1.55e-09	1.88e-11	7.58057	15.7313	1.22699	NM_024089,AK074974	chr13:103436433-103451357	NC_000013.10	-	103436433
2624074	1.56e-09	1.91e-11	7.57751	15.7168	0.902823	NM_206825,NM_014366,NM_206826,NM_018446,NM_001010983,NR_003687,AF191018,BC001024,AY825265	chr3:52719936-52730172	NC_000003.11	+	52719936
2947081	1.62e-09	1.98e-11	7.56973	15.6798	1.95325	NM_003546,BC069392	chr6:27840936-27842010	NC_000006.11	-	27840936
2758686	1.66e-09	2.05e-11	7.56346	15.65	1.05447	NM_017816,NM_001145725,AK290750	chr4:4269451-4292180	NC_000004.11	-	4269451
3824623	1.76e-09	2.18e-11	-7.55034	15.5877	-2.29492	NM_000453,U66088	chr19:17982764-18005983	NC_000019.9	+	17982764
3082181	1.77e-09	2.19e-11	7.54926	15.5826	1.02214	NM_017760,BC043404	chr7:158376652-158497588	NC_000007.13	-	158376652
2931391	1.99e-09	2.48e-11	7.52419	15.4636	1.02715	NM_015440,NM_005738,NM_212460,NM_001037164,NM_001195396,AY374130,BC136685,BC144368,AB127387,BC008629,AY374131,AF493890,BC001111,BC003027,U73960,AF086425,AK127089,BC144369,AK315378,AK310342	chr6:151186685-151538114	NC_000006.11	+	151186685
3240012	2e-09	2.49e-11	7.52282	15.4572	1.27489	NM_001172303,NM_032844,NM_001172304,AK123004	chr10:27437855-27476860	NC_000010.10	+	27437855
2500803	2e-09	2.5e-11	7.52192	15.4529	0.897741	NM_153712,AB071393	chr2:113239741-113296901	NC_000002.11	+	113239741
2993647	2.01e-09	2.53e-11	7.51954	15.4416	1.24338		control		---	0
3444043	2.04e-09	2.57e-11	7.51634	15.4264	1.48105	NM_002543,NM_001172632,NM_001172633,AB010710	chr12:10310905-10333092	NC_000012.11	-	10310905
3466369	2.06e-09	2.61e-11	7.51368	15.4138	1.45907	NM_018351,BC013319	chr12:95473544-95611855	NC_000012.11	-	95473544
3991650	2.1e-09	2.68e-11	7.50826	15.3881	1.01505	NM_032458,NM_001015877,NM_032335,AY157622	chrX:133505867-133562815	NC_000023.10	+	133505867
3125571	2.13e-09	2.72e-11	7.50533	15.3743	1.63644	NM_002445,NM_138715,NM_138716,BC063878	chr8:15899790-16072563	NC_000008.10	-	15899790
2695941	2.15e-09	2.75e-11	7.50278	15.3621	1.02022	NM_007027,BC151237	chr3:133317039-133380837	NC_000003.11	-	133317039
2673873	2.19e-09	2.81e-11	7.49795	15.3393	1.10723	NM_000884,BC006124	chr3:49061116-49066855	NC_000003.11	-	49061116
3655628	2.2e-09	2.84e-11	7.49633	15.3316	0.846661	NM_007317,AK316389	chr16:29801410-29817277	NC_000016.9	+	29801410
3080283	2.24e-09	2.9e-11	7.49152	15.3088	1.087	NM_005431,AF035587	chr7:152343085-152373245	NC_000007.13	-	152343085
3331903	2.28e-09	2.96e-11	7.48775	15.2909	1.40427	NM_198947,NM_001142703,NM_001142704,AY457926	chr11:58874667-58894868	NC_000011.9	+	58874667
2790626	2.32e-09	3.03e-11	-7.48284	15.2677	-2.04686	NM_000508,NM_021871,M58569	chr4:155504280-155511886	NC_000004.11	-	155504280
3023060	2.34e-09	3.07e-11	7.48031	15.2557	1.28855	NM_001219,NM_001130674,HM002615	chr7:128379214-128413453	NC_000007.13	+	128379214
3446796	2.42e-09	3.18e-11	7.47258	15.2191	1.31969	NM_002907,NM_032941,NM_024854,AK291627,AK125461	chr12:21601807-21654865	NC_000012.11	-	21601807
3114832	2.42e-09	3.18e-11	7.47279	15.2201	1.30682	NM_003129,D78130	chr8:125994557-126036340	NC_000008.10	+	125994557
3645626	2.42e-09	3.2e-11	7.47149	15.214	1.21047	NM_001012631,NM_004221,NM_001012718,NM_001012633,NM_001012632,NM_001012634,NM_001012635,NM_001012636,BC009401	chr16:3115307-3132234	NC_000016.9	+	3115307
2397732	2.43e-09	3.24e-11	7.46898	15.2021	1.10515	NM_024758,BC005090	chr1:15896137-15911595	NC_000001.10	-	15896137
3879467	2.43e-09	3.23e-11	7.46953	15.2047	1.06843	NM_012255,AF064257	chr20:21271705-21374172	NC_000020.10	+	21271705
3852565	2.54e-09	3.41e-11	7.45858	15.1529	1.28241	NM_018154,BC036521	chr19:14230348-14247802	NC_000019.9	-	14230348
3526655	2.54e-09	3.39e-11	-7.45972	15.1582	-3.48906	NM_000705,BC029059	chr13:114303119-114312668	NC_000013.10	-	114303119
2902804	2.61e-09	3.51e-11	7.45225	15.1229	1.12585	NM_000063,NM_001145903,NM_001178063,BC043484,AK300930,AK300892,AK298808,AK298311,BC029781,AK304045,AK096258,BX537504	chr6:31865574-31913444	NC_000006.11	+	31865574
3791782	2.71e-09	3.66e-11	7.44414	15.0845	1.96123	NM_002639,U04313	chr18:61144161-61172315	NC_000018.9	+	61144161
2527814	2.74e-09	3.7e-11	7.44141	15.0716	1.77026	NM_007127,AK300965	chr2:219283853-219318221	NC_000002.11	+	219283853
3903836	2.77e-09	3.78e-11	7.43713	15.0514	1.27364	NM_002212,NM_181468,NM_181466,BC001119,BC011845,AF022229,BC019305,AB062289,CR456764,AK296076,AK296878,Y11435,AK096805,CR615992	chr20:33812343-33872811	NC_000020.10	-	33812343
3972093	2.77e-09	3.77e-11	7.43783	15.0547	1.05614	NM_016937,NR_003007,BX648513	chrX:24712046-25015093	NC_000023.10	+	24712046
3127818	2.88e-09	3.93e-11	7.4291	15.0134	1.00293	NM_002318,U89942	chr8:23154162-23282831	NC_000008.10	-	23154162
3050367	2.95e-09	4.05e-11	7.4231	14.985	1.10088	NM_001042762,NM_022116,BC051867,AK027537,AK023142	chr7:50511831-50518055	NC_000007.13	-	50511831
2406255	2.97e-09	4.09e-11	7.42113	14.9757	0.986202		control		---	0
3581386	3.11e-09	4.29e-11	7.411	14.9279	0.892193	NM_017955,NM_145701,AF322239	chr14:105475930-105514413	NC_000014.8	-	105475930
2900059	3.2e-09	4.43e-11	7.40441	14.8967	1.97082	NM_003521,BC066244	chr6:27782835-27783267	NC_000006.11	+	27782835
3666686	3.23e-09	4.48e-11	7.40202	14.8855	1.17521	NM_016101,BC015941	chr16:69373368-69377543	NC_000016.9	+	69373368
3381925	3.27e-09	4.57e-11	7.39824	14.8676	1.15841	NM_173582,AB019210	chr11:74041364-74109712	NC_000011.9	-	74041364
4005627	3.38e-09	4.73e-11	7.39106	14.8337	1.02506	NM_144970,AK095710	chrX:40486176-40506925	NC_000023.10	-	40486176
3630099	3.49e-09	4.9e-11	7.38375	14.7992	1.12328	NM_017858,NR_004388,BC000870	chr15:66629013-66707418	NC_000015.9	-	66629013
3901665	3.67e-09	5.17e-11	7.37246	14.7459	1.00152	NM_020531,BC003501	chr20:24943595-24973595	NC_000020.10	-	24943595
3945545	3.72e-09	5.26e-11	7.36923	14.7307	1.31922	NM_004900,NM_001193289,NM_145298,BC038808,AK024854	chr22:39378327-39388762	NC_000022.10	+	39378327
3445544	3.97e-09	5.65e-11	7.35425	14.6601	1.27975	NM_024829,BC063561	chr12:14656617-14721115	NC_000012.11	-	14656617
3078348	3.97e-09	5.63e-11	7.35491	14.6632	1.14723	NM_004456,NM_152998,AB208895	chr7:148504503-148581714	NC_000007.13	-	148504503
3573870	4.04e-09	5.78e-11	7.34972	14.6387	1.23335	NM_013989,NM_001007023,NM_000793,AF093774	chr14:80633750-80678820	NC_000014.8	-	80633750
3361381	4.04e-09	5.78e-11	7.34967	14.6385	0.97858	NM_016229,AB209000	chr11:7686336-7709665	NC_000011.9	-	7686336
3110317	4.31e-09	6.2e-11	7.335	14.5694	1.22765	NM_138455,AY358914	chr8:104383743-104395212	NC_000008.10	+	104383743
3752437	4.31e-09	6.21e-11	7.33476	14.5682	1.08739	NM_018428,AF334386	chr17:30187040-30228726	NC_000017.10	-	30187040
2818035	4.36e-09	6.3e-11	-7.33187	14.5546	-1.34135	NM_001825,NM_001099735,NM_001099736,BC029140	chr5:80529152-80562209	NC_000005.9	+	80529152
3962165	4.51e-09	6.53e-11	7.32421	14.5186	0.938862	NM_024053,NM_001002876,NM_001110215,AK123479	chr22:42334184-42349219	NC_000022.10	-	42334184
3250237	4.58e-09	6.66e-11	7.32018	14.4996	1.27827	NM_025130,AK291024	chr10:70980059-71027302	NC_000010.10	+	70980059
2970942	4.69e-09	6.84e-11	7.31484	14.4745	1.16497	NM_000493,BC130621	chr6:116440092-116518549	NC_000006.11	-	116440092
3752709	4.75e-09	6.95e-11	7.3114	14.4583	1.1729	NM_015194,BC146763	chr17:30819540-31204200	NC_000017.10	-	30819540
2801526	4.75e-09	6.96e-11	7.31099	14.4563	1.06138	NM_012073,AK302383	chr5:10250111-10266501	NC_000005.9	+	10250111
3539070	5.11e-09	7.53e-11	7.29496	14.3809	1.2505	NM_001530,NM_181054,BC012527	chr14:62155742-62215469	NC_000014.8	+	62155742
3449700	5.18e-09	7.65e-11	7.29167	14.3655	1.3366	NM_001135811,NM_021238,NM_001135812,BX648630	chr12:31411691-31523439	NC_000012.11	-	31411691
3471819	5.42e-09	8.03e-11	7.2816	14.3181	1.18511	NM_024953,BX641140	chr12:112461433-112546577	NC_000012.11	-	112461433
2908052	5.45e-09	8.1e-11	7.27983	14.3098	0.843291	NM_203290,NM_004875,BC008863,AF008442,AK293561,BC008118	chr6:43484791-43497093	NC_000006.11	+	43484791
2946232	5.62e-09	8.39e-11	7.27235	14.2746	1.03638	NM_005319,AK290947	chr6:26055008-26069669	NC_000006.11	-	26055008
3149843	5.62e-09	8.4e-11	7.2722	14.2739	0.916844	NM_006265,BC050381	chr8:117840680-117887103	NC_000008.10	-	117840680
3949055	5.84e-09	8.75e-11	7.26367	14.2338	1.01261	NM_016426,BC075828	chr22:46692757-46730193	NC_000022.10	+	46692757
2545549	6.25e-09	9.39e-11	7.24902	14.1651	1.04013	NR_028323,NM_021095,AF069307,AF081571,BC015631,BC012806,AK293162,AF442150,AK314545,AL096737	chr2:27384333-27435877	NC_000002.11	-	27384333
3982462	6.28e-09	9.52e-11	7.24619	14.1517	1.32189	NM_000291,AB062432	chrX:77320664-77382535	NC_000023.10	+	77320664
3066436	6.28e-09	9.51e-11	7.24639	14.1527	1.14573	NM_019042,BC011396	chr7:105096774-105162743	NC_000007.13	-	105096774
2369110	6.28e-09	9.48e-11	7.24714	14.1562	0.932195	NM_170692,NM_004841,BC110611	chr1:178062816-178445853	NC_000001.10	+	178062816
3294280	6.33e-09	9.73e-11	7.24175	14.1309	1.73074	NM_015190,AB023191,AK094162	chr10:74943140-75288915	NC_000010.10	-	74943140
3896621	6.33e-09	9.7e-11	7.24232	14.1336	1.38691	NM_017671,AB105105	chr20:6055492-6104305	NC_000020.10	-	6055492
3108072	6.33e-09	9.66e-11	7.24328	14.1381	1.05443	NM_014754,BC004390,AK126443	chr8:97273524-97349213	NC_000008.10	+	97273524
3106559	6.33e-09	9.64e-11	-7.24357	14.1395	-1.31075	NM_052832,NM_134266,NM_001129890,AF331521,AK097393	chr8:92114890-92688766	NC_000008.10	+	92114890
3512449	6.35e-09	9.78e-11	7.24063	14.1257	1.03372	NM_012345,AF159548	chr13:45513218-45657239	NC_000013.10	-	45513218
2473991	6.43e-09	9.93e-11	7.23751	14.111	0.968131	NM_001809,NM_001042426,U14518	chr2:27005784-27023925	NC_000002.11	+	27005784
2624565	6.51e-09	1.01e-10	7.23421	14.0955	1.17592	NM_018725,AF208111	chr3:53880535-53900224	NC_000003.11	+	53880535
3151719	6.54e-09	1.02e-10	7.23277	14.0888	2.03827	NM_001003954,NM_004306,AK290281	chr8:124693037-124749642	NC_000008.10	-	124693037
3775686	6.92e-09	1.08e-10	7.22042	14.0309	1.18	NM_005151,NM_001037334,BC003556	chr18:158498-214716	NC_000018.9	+	158498
2363689	7.06e-09	1.11e-10	7.21493	14.0051	1.39275	NM_001136219,NM_021642,NM_201563,M31932	chr1:161415096-161493194	NC_000001.10	+	161415096
3347118	7.06e-09	1.11e-10	-7.21495	14.0052	-1.10419	NM_001077243,NM_000829,NM_001077244,NM_001112812,AB209092	chr11:105462602-105852815	NC_000011.9	+	105462602
2709486	7.1e-09	1.12e-10	7.21321	13.997	0.964794	NM_002916,NM_181573,BC017452,BC024022,CR536561,BT006987,AK297282,M87339,BC028116,AK094454	chr3:186506038-186564597	NC_000003.11	-	186506038
3764680	7.15e-09	1.13e-10	7.21103	13.9869	0.981567	NM_015294,NM_001005207,BX537955	chr17:57060013-57184837	NC_000017.10	-	57060013
3894601	7.26e-09	1.15e-10	7.2073	13.9694	1.36346	NM_000801,NM_054014,BC001925	chr20:1349635-1402704	NC_000020.10	-	1349635
2610241	7.29e-09	1.16e-10	7.20536	13.9603	1.0424	NM_033084,NM_001018115,AF230336	chr3:10068080-10145436	NC_000003.11	+	10068080
2438531	7.29e-09	1.16e-10	7.20571	13.9619	0.912267	NM_004494,NM_001126050,NM_001126051,D16431	chr1:156711908-156736707	NC_000001.10	-	156711908
2454444	7.44e-09	1.19e-10	7.20054	13.9377	0.970703	NM_002497,BC043502	chr1:211836122-211848967	NC_000001.10	-	211836122
3973692	7.63e-09	1.22e-10	7.19466	13.9102	1.1429	NM_001173486,NM_001173489,NM_000950,NM_001173490,NM_001142395,AF009242,BC060833	chrX:37161801-37316542	NC_000023.10	+	37161801
3633699	7.76e-09	1.24e-10	-7.19064	13.8913	-1.4926	NM_138573,BX538100	chr15:76228068-76360394	NC_000015.9	-	76228068
3510362	7.84e-09	1.26e-10	7.18788	13.8784	1.04436	NM_025138,NM_170719,BC064348	chr13:39584002-39612213	NC_000013.10	-	39584002
3326252	7.89e-09	1.27e-10	7.18582	13.8688	0.984902	NM_024662,NM_001144030,BC035558	chr11:34127112-34169193	NC_000011.9	+	34127112
3980904	8.01e-09	1.3e-10	7.1823	13.8523	0.9445		control		---	0
3761451	8.1e-09	1.32e-10	7.17821	13.8331	1.16396	NM_024017,BC015565	chr17:46694457-46705026	NC_000017.10	-	46694457
3399545	8.1e-09	1.32e-10	7.17818	13.833	0.957799	NM_015261,BC098398	chr11:134018438-134095180	NC_000011.9	-	134018438
3708201	8.1e-09	1.32e-10	7.17844	13.8342	0.901941	NM_001142798,NM_174893,NM_001142799,AK055800	chr17:6918381-6923023	NC_000017.10	+	6918381
2746024	8.19e-09	1.34e-10	7.17539	13.8199	1.17104	NM_002940,NM_001040876,BC016283	chr4:146019176-146050676	NC_000004.11	+	146019176
3315675	8.23e-09	1.35e-10	7.17366	13.8118	1.33528	NM_003641,J04164	chr11:310891-315260	NC_000011.9	+	310891
3235461	8.29e-09	1.36e-10	7.17159	13.8021	1.04257	NM_006023,AK225634	chr10:12237965-12365384	NC_000010.10	+	12237965
3908358	8.33e-09	1.37e-10	7.17004	13.7949	1.14962	NM_018837,NM_198596,NM_001161841,AB033073	chr20:46284890-46415363	NC_000020.10	-	46284890
3402315	8.81e-09	1.46e-10	7.15782	13.7377	1.23416	NM_001769,AY966455	chr12:6291875-6376837	NC_000012.11	+	6291875
2922715	8.83e-09	1.46e-10	7.1567	13.7325	1.2964	NM_153711	chr6:116832808-116845951	NC_000006.11	+	116832808
3293280	8.98e-09	1.49e-10	7.15275	13.714	0.944228	NM_021129,AF092439	chr10:71962598-71993647	NC_000010.10	-	71962598
2471316	9.04e-09	1.51e-10	7.15077	13.7047	1.33872	NM_182625,NM_001130009,BC117204,BC038243	chr2:17935172-17995167	NC_000002.11	+	17935172
3085065	9.5e-09	1.59e-10	7.13984	13.6537	1.1155	NM_153332,AY310909	chr8:8860334-8974238	NC_000008.10	+	8860334
2863363	9.58e-09	1.61e-10	7.13697	13.6403	1.41749	NM_004101,BX537386	chr5:75911258-75919240	NC_000005.9	-	75911258
3106243	9.58e-09	1.61e-10	7.13718	13.6413	1.09056	NM_003821,AY358814	chr8:90769550-90836043	NC_000008.10	+	90769550
3200611	9.58e-09	1.61e-10	7.13639	13.6376	1.00285	NM_017645,NR_003009,AF533709	chr9:19052752-19103153	NC_000009.11	-	19052752
3347831	9.71e-09	1.64e-10	7.13304	13.6219	1.00119	NM_004398,AB040537	chr11:108535800-108811648	NC_000011.9	+	108535800
3881786	9.8e-09	1.66e-10	7.13056	13.6103	0.909686	NM_015352,NM_172236,AF375884	chr20:30795683-30826438	NC_000020.10	+	30795683
3591281	1.01e-08	1.71e-10	7.12403	13.5798	1.22352	NM_024956,BC009981	chr15:43423282-43477338	NC_000015.9	+	43423282
2899223	1.03e-08	1.75e-10	7.11972	13.5597	1.29777	NM_021052,BC093836	chr6:26217148-26217711	NC_000006.11	+	26217148
3247757	1.05e-08	1.79e-10	7.1146	13.5358	1.12579	NM_003338,AF257220	chr10:60094739-60130509	NC_000010.10	+	60094739
3974556	1.05e-08	1.8e-10	7.11384	13.5322	1.06216	NM_005765,AF291814	chrX:40440170-40482545	NC_000023.10	+	40440170
3144859	1.08e-08	1.85e-10	7.10782	13.5041	2.7491	NM_004063,NM_001144663,U07969	chr8:95084688-95220838	NC_000008.10	-	95084688
3556323	1.08e-08	1.87e-10	7.10598	13.4956	1.08501	NM_007192,AK091676	chr14:21818601-21852425	NC_000014.8	-	21818601
3556816	1.11e-08	1.91e-10	7.10128	13.4736	1.20277	NM_003982,NM_001126106,NM_001126105,AB020532	chr14:23242434-23299029	NC_000014.8	-	23242434
2957126	1.13e-08	1.95e-10	7.09663	13.4519	0.932008	NM_002388,AK301704	chr6:52128780-52248684	NC_000006.11	-	52128780
2526759	1.16e-08	2.01e-10	7.09068	13.4242	0.965194	NM_004044,AK298142	chr2:216151540-216215630	NC_000002.11	+	216151540
3003193	1.18e-08	2.05e-10	7.08696	13.4069	0.8625	NM_001762,NM_001009186,AB063318	chr7:56119400-56131654	NC_000007.13	+	56119400
3150455	1.22e-08	2.12e-10	7.07952	13.3722	1.48222	NM_002546,BC030155	chr8:119873673-119984634	NC_000008.10	-	119873673
2480992	1.24e-08	2.17e-10	7.07498	13.351	1.13548	NM_000251,AK304496,BC021566,U04045,U03911,L47581,L47582,L47583,AK297763,AK296831,AK299667,AK222860,AK223284,DQ648896,BC012599	chr2:47630250-47789430	NC_000002.11	+	47630250
2371139	1.25e-08	2.19e-10	7.07324	13.3429	1.40287	NM_005562,NM_018891,AK296944	chr1:183134239-183228100	NC_000001.10	+	183134239
2436157	1.25e-08	2.19e-10	7.07282	13.3409	1.07855		control		---	0
2906591	1.25e-08	2.21e-10	-7.07087	13.3318	-1.24136	NM_006789,AK300689	chr6:41020972-41032620	NC_000006.11	+	41020972
3944147	1.27e-08	2.24e-10	7.06793	13.3182	0.982281	NM_006739,BC000142	chr22:35795987-35922697	NC_000022.10	+	35795987
2473284	1.3e-08	2.31e-10	7.06149	13.2882	1.0602	NM_024322,NM_004036,BC002870,AK027859,CR592453	chr2:25015917-25045680	NC_000002.11	+	25015917
3904119	1.3e-08	2.32e-10	7.06117	13.2867	0.93016	NM_152930,NM_152931,NM_152927,NM_152928,NM_152925,NM_152929,NM_006047,NM_152838,NM_152926,NM_003915,BC001142,U83246,CR456790,AF345332,AF393214,BC012787,BC013981,AK299371,AK308795,CR618133,DQ656050,DQ655946	chr20:34214011-34252878	NC_000020.10	-	34214011
2939814	1.33e-08	2.37e-10	7.05604	13.2628	0.962307	NM_006638,BC017871	chr6:4964408-5004270	NC_000006.11	-	4964408
3428447	1.39e-08	2.48e-10	7.04642	13.218	1.02682	NM_014503,AF072718	chr12:101640624-101780384	NC_000012.11	+	101640624
2770469	1.42e-08	2.55e-10	7.04122	13.1938	1.16974	NM_001553,BC017201	chr4:57896593-57976823	NC_000004.11	-	57896593
3039671	1.42e-08	2.55e-10	-7.04133	13.1943	-2.21805	NM_015464,AK093408,AY255634	chr7:16501106-16570195	NC_000007.13	-	16501106
3720636	1.47e-08	2.65e-10	7.03306	13.1559	1.06388	NM_002809,AK293539	chr17:38136912-38154206	NC_000017.10	+	38136912
3185558	1.5e-08	2.71e-10	7.02832	13.1338	1.00098	NM_004697,BC001588	chr9:116037409-116055446	NC_000009.11	+	116037409
2993654	1.6e-08	2.91e-10	7.01354	13.0651	1.50702		control		---	0
2677356	1.6e-08	2.91e-10	7.01355	13.0652	1.06661	NM_003392,BC064694	chr3:55499743-55521660	NC_000003.11	-	55499743
3136413	1.6e-08	2.9e-10	7.0141	13.0677	0.929282	NM_017813,BC067814	chr8:57870496-57906458	NC_000008.10	-	57870496
2779302	1.63e-08	2.97e-10	-7.00896	13.0438	-1.99786	NM_000673,NM_001166504,U09623	chr4:100333438-100356571	NC_000004.11	-	100333438
2436132	1.69e-08	3.08e-10	7.0015	13.0092	1.0738	NM_004515,BC000382	chr1:153633748-153643479	NC_000001.10	-	153633748
3312422	1.7e-08	3.11e-10	6.99966	13.0006	2.10945	NM_152311,BX640823	chr10:129676114-129710388	NC_000010.10	-	129676114
3896524	1.7e-08	3.12e-10	6.99841	12.9948	0.85131	NM_015939,AB032979	chr20:5917881-5931370	NC_000020.10	-	5917881
2947073	1.79e-08	3.29e-10	6.98758	12.9445	1.553	NM_005322,BC069101	chr6:27834570-27835359	NC_000006.11	-	27834570
2436754	1.82e-08	3.37e-10	6.98257	12.9213	0.972912	NM_001111,NM_015840,NM_001025107,NM_015841,NM_001193495,BC038227	chr1:154554563-154600471	NC_000001.10	-	154554563
3556924	1.82e-08	3.37e-10	6.98265	12.9217	0.940504	NM_001039619,NM_006109,AF167572	chr14:23389745-23398661	NC_000014.8	-	23389745
3890870	1.82e-08	3.38e-10	6.98187	12.9181	0.919913	NM_020673,BC063457	chr20:56884771-56942556	NC_000020.10	+	56884771
3884100	1.87e-08	3.48e-10	6.97561	12.889	1.05035	NM_002951,NM_001135771,BC020222,BC003560,CR456899,AK296126,AK123690,AK308683	chr20:35806813-35870307	NC_000020.10	+	35806813
3391255	1.93e-08	3.6e-10	6.96871	12.857	1.33867	NM_001562,AY266351	chr11:112013986-112046607	NC_000011.9	-	112013986
2517408	1.98e-08	3.71e-10	6.96267	12.829	1.17012	NM_003659,AY544121	chr2:178257406-178408552	NC_000002.11	+	178257406
3372368	1.98e-08	3.71e-10	6.96216	12.8266	0.990933	NM_014342,AY380792	chr11:47623990-47664185	NC_000011.9	-	47623990
3563395	1.98e-08	3.71e-10	6.96214	12.8266	0.958185	NM_002692,NM_001197330,NM_001197331,AF036899	chr14:50110274-50154921	NC_000014.8	-	50110274
3375862	2.04e-08	3.83e-10	6.95559	12.7962	1.00166	NM_004739,BC053650	chr11:62360686-62369014	NC_000011.9	-	62360686
3417485	2.07e-08	3.91e-10	6.95155	12.7775	0.923202	NM_024068,BC006171	chr12:56615804-56623637	NC_000012.11	+	56615804
4050485	2.18e-08	4.13e-10	6.93994	12.7237	1.25613	NM_006088,NM_001185091,NM_000832,NM_021569,NM_007327,NM_001185090,D13515,BX648521	chr9:140050886-140195398	NC_000009.11	+	140050886
2711644	2.26e-08	4.29e-10	6.93188	12.6864	1.06021	NM_024524,BX641098	chr3:194123414-194275924	NC_000003.11	-	194123414
2950214	2.29e-08	4.37e-10	6.92813	12.669	1.12813	NM_000593,BC014081,AY523971,L21204,L21206,L21207,L21208,AB012644,L21205,AY523970,AK302340,BX648013,AK123494,AK130176,AK093980	chr6:32812989-32822092	NC_000006.11	-	32812989
3744263	2.29e-08	4.34e-10	6.92927	12.6743	0.946036	NM_004217,BC013300	chr17:8093911-8113924	NC_000017.10	-	8093911
2662020	2.36e-08	4.51e-10	6.92129	12.6374	0.877735	NM_020165,AF169796	chr3:8817108-9005146	NC_000003.11	-	8817108
3373724	2.43e-08	4.64e-10	6.91525	12.6094	0.905669	NM_003146,AB209132	chr11:57088751-57103442	NC_000011.9	-	57088751
2516023	2.48e-08	4.75e-10	6.91047	12.5873	1.24216	NM_031942,NM_145810,AK075134	chr2:174136248-174252154	NC_000002.11	+	174136248
3433747	2.48e-08	4.77e-10	6.90949	12.5828	0.973883	NM_181578,NM_001130113,NM_007370,NM_001130112,BC001866	chr12:118454510-118475866	NC_000012.11	+	118454510
2772805	2.55e-08	4.92e-10	-6.90312	12.5533	-1.70635	NM_000583,AK315853	chr4:72577975-72704867	NC_000004.11	-	72577975
2332144	2.61e-08	5.04e-10	6.89798	12.5296	0.933273	NM_001905,BC009408	chr1:41403898-41478228	NC_000001.10	+	41403898
2468920	2.63e-08	5.09e-10	6.89599	12.5204	1.02116	NM_016207,BC011654	chr2:9563753-9613217	NC_000002.11	+	9563753
3422144	2.66e-08	5.16e-10	6.89308	12.5069	1.98047	NM_003667,AK075399	chr12:71833681-71980089	NC_000012.11	+	71833681
3994915	2.66e-08	5.18e-10	6.89235	12.5036	0.83551	NM_005342,BX537505	chrX:150034667-150184588	NC_000023.10	+	150034667
2726542	2.69e-08	5.24e-10	-6.88996	12.4925	-1.36111	NM_025087,AK300495	chr4:48988139-49083815	NC_000004.11	+	48988139
2965739	2.72e-08	5.31e-10	6.88719	12.4797	1.07599	NM_198468	chr6:97593652-97731086	NC_000006.11	-	97593652
3607698	2.72e-08	5.33e-10	6.88632	12.4757	1.0267	NM_152259,GQ227787	chr15:90056349-90174277	NC_000015.9	+	90056349
3695268	2.73e-08	5.37e-10	6.88478	12.4686	1.10646	NM_001018159,NM_003905,NM_001018160,U50939	chr16:66836783-66907141	NC_000016.9	-	66836783
2947063	2.75e-08	5.4e-10	6.8834	12.4622	1.07906	NM_003510,BC034487	chr6:27805058-27806117	NC_000006.11	-	27805058
3683584	2.83e-08	5.58e-10	-6.87643	12.4301	-1.53719	NM_174924,BC042607	chr16:20370492-20416049	NC_000016.9	-	20370492
3839920	2.85e-08	5.64e-10	6.87435	12.4205	1.23913	NM_002030,BC059388	chr19:52298421-52343028	NC_000019.9	+	52298421
2775994	2.85e-08	5.66e-10	6.8736	12.417	0.873519	NM_006665,NM_001098540,NM_001166498,AF155510,BC051321,AF144325,GQ337902,AF165154,AF152376,GQ337901,AF084467,HM187643,AK090910	chr4:84213620-84256305	NC_000004.11	-	84213620
3549092	2.85e-08	5.64e-10	-6.87437	12.4206	-1.64233	NM_001275,BC006459	chr14:93389480-93401606	NC_000014.8	+	93389480
3833291	2.88e-08	5.72e-10	6.87131	12.4064	0.927985	NM_006503,NM_153001,BC014488	chr19:40476932-40487341	NC_000019.9	+	40476932
3394192	2.9e-08	5.79e-10	6.86887	12.3951	0.923828	NM_001382,BC000325,AK301973,BC047771,BT006802,AK128572,AK095718,AK095122,Z82022	chr11:118967044-118979031	NC_000011.9	-	118967044
3442024	2.94e-08	5.88e-10	6.86545	12.3794	0.953165	NM_001033714,NM_006170,BC065257,BC106072,BC082985,BC000656,M32110,BC128183,BC128184	chr12:6666029-6677556	NC_000012.11	-	6666029
3784602	3.01e-08	6.03e-10	6.86021	12.3552	1.1095	NM_020474,BC038440	chr18:33161101-33292207	NC_000018.9	+	33161101
3114064	3.12e-08	6.26e-10	6.85218	12.3182	0.950534	NM_145647,NM_001145088,BC101724	chr8:124084920-124171464	NC_000008.10	+	124084920
3427767	3.13e-08	6.29e-10	6.85129	12.3141	1.08921	NM_001032283,NM_001032284,NM_003276,BC053675	chr12:98871796-98978412	NC_000012.11	+	98871796
3833093	3.22e-08	6.5e-10	6.84446	12.2826	0.855088	NM_001001563,BC121147	chr19:39970941-39984418	NC_000019.9	+	39970941
3717737	3.23e-08	6.52e-10	6.84373	12.2792	0.978486	NM_002815,AK290602	chr17:30770974-30810336	NC_000017.10	+	30770974
3333622	3.23e-08	6.54e-10	6.84306	12.2761	0.854297	NM_002696,U20659	chr11:62529009-62534698	NC_000011.9	+	62529009
3666366	3.27e-08	6.67e-10	6.83894	12.2571	1.14808	NM_001793,BC014462	chr16:68678739-68732940	NC_000016.9	+	68678739
3098977	3.27e-08	6.67e-10	6.83902	12.2575	1.03392	NM_002350,NM_001111097,AK290494	chr8:56791951-56924737	NC_000008.10	+	56791951
3336238	3.27e-08	6.66e-10	6.83935	12.259	0.942855	NM_005700,NM_130443,BC001446,AK027645	chr11:66247731-66277112	NC_000011.9	+	66247731
3863060	3.35e-08	6.84e-10	6.83348	12.232	0.792446	NM_020158,AF285785	chr19:41892287-41903384	NC_000019.9	-	41892287
3676692	3.47e-08	7.1e-10	6.82575	12.1964	1.15298		control		---	0
2406245	3.57e-08	7.37e-10	6.81795	12.1605	1.08558	NM_002794,BC107901	chr1:36066669-36118286	NC_000001.10	-	36066669
3476130	3.57e-08	7.37e-10	6.81788	12.1601	0.976206	NM_001167856,NM_018183,AB014772	chr12:123776470-123869331	NC_000012.11	-	123776470
3773312	3.57e-08	7.37e-10	6.8179	12.1603	0.952935	NM_014740,BC004386	chr17:78108838-78120956	NC_000017.10	-	78108838
3699769	3.57e-08	7.36e-10	6.81827	12.1619	0.923858		control		---	0
3658925	3.61e-08	7.47e-10	6.81502	12.147	1.00198	NM_014321,AF139658	chr16:46723023-46732305	NC_000016.9	+	46723023
3435946	3.77e-08	7.84e-10	6.80488	12.1004	1.04471	NM_001516,BC039726	chr12:124118344-124147150	NC_000012.11	+	124118344
2806517	3.81e-08	7.95e-10	6.80198	12.087	1.08146	NM_005983,NM_032637,AK291255	chr5:36137493-36184113	NC_000005.9	+	36137493
2527856	3.81e-08	7.94e-10	6.80219	12.088	0.897366	NM_005444,AB500892	chr2:219433308-219461783	NC_000002.11	+	219433308
3719150	3.87e-08	8.1e-10	6.79786	12.0681	1.16323	NM_178517,AB097818	chr17:34890857-34895150	NC_000017.10	+	34890857
3787855	3.87e-08	8.09e-10	6.79818	12.0695	1.06813	NM_006033,AF118767	chr18:47087079-47227325	NC_000018.9	+	47087079
3421446	3.87e-08	8.12e-10	6.79738	12.0658	0.922115	NM_007007,BC000714	chr12:69633359-69735148	NC_000012.11	+	69633359
2764478	3.89e-08	8.19e-10	-6.79559	12.0576	-1.8636	NM_000730,L19315	chr4:26473318-26558929	NC_000004.11	-	26473318
3152220	3.99e-08	8.43e-10	6.78944	12.0294	0.99786	NM_014846,BC106015	chr8:126036509-126104129	NC_000008.10	-	126036509
2876479	3.99e-08	8.4e-10	6.79012	12.0325	0.86121	NM_004893,NM_138609,NM_138610,NM_001040158,AB209490	chr5:134670071-134808041	NC_000005.9	-	134670071
3214845	4.04e-08	8.58e-10	6.78574	12.0123	2.04788	NM_017680,NM_001193335,AY029191	chr9:95218497-95244788	NC_000009.11	-	95218497
2488732	4.04e-08	8.57e-10	6.78602	12.0136	0.944682	NM_001166285,NM_006429,NR_029403,NR_029402,NM_001166284,NM_001009570,AK297846	chr2:73461425-73480121	NC_000002.11	+	73461425
2954678	4.11e-08	8.73e-10	6.78206	11.9955	0.926662	NM_020750,AF298880,BC062635,AK291452,AF271159,BC000129,AK127513	chr6:43488317-43543768	NC_000006.11	-	43488317
4015763	4.23e-08	9.02e-10	6.77525	11.9642	0.936371	NM_000169,AK291095	chrX:100652805-100662984	NC_000023.10	-	100652805
3834379	4.29e-08	9.16e-10	6.77199	11.9492	2.75218	NM_002483,NM_001815,M18728	chr19:42259387-42276104	NC_000019.9	+	42259387
2872848	4.31e-08	9.22e-10	6.7705	11.9424	1.54701	NM_002317,NM_001178102,AF039291	chr5:121398890-121414046	NC_000005.9	-	121398890
2990043	4.45e-08	9.54e-10	6.76327	11.9091	0.897631	NM_014660,NR_033435,NR_033436,BC152414,AK295461,AK294419,AK123522,BC104657	chr7:10828922-11248139	NC_000007.13	+	10828922
2947077	4.49e-08	9.65e-10	6.76088	11.8982	1.52356	NM_003533,BC066884	chr6:27839633-27840144	NC_000006.11	-	27839633
2900051	4.5e-08	9.73e-10	6.75903	11.8897	1.15915	NM_003536,BC096128	chr6:27777852-27779077	NC_000006.11	+	27777852
3458783	4.5e-08	9.7e-10	6.75974	11.8929	0.931903	NM_000075,BC005864,BX647402	chr12:58141547-58149798	NC_000012.11	-	58141547
3338453	4.5e-08	9.73e-10	6.75911	11.8901	0.886115	NM_003626,NM_177423,BC034046	chr11:70116816-70230607	NC_000011.9	+	70116816
3383164	4.52e-08	9.81e-10	6.75745	11.8824	0.978738	NM_024079,NM_001007027,BC001133	chr11:77806353-77850689	NC_000011.9	-	77806353
3147726	4.6e-08	9.99e-10	6.75347	11.8642	1.02282	NM_030780,BC021893,NR_034092,AK125733,AK001439	chr8:104177892-104427464	NC_000008.10	-	104177892
3153328	4.62e-08	1e-09	6.75235	11.859	0.992498	BC017297,BC016345,BC003599,AK002059,AK001226	chr8:130838384-131028908	NC_000008.10	-	130838384
2406258	4.62e-08	1.01e-09	6.75114	11.8535	0.943358		control		---	0
3374746	4.62e-08	1.01e-09	6.7513	11.8542	0.942855	NM_152716,BC065264	chr11:59404194-59436523	NC_000011.9	-	59404194
2352228	4.7e-08	1.03e-09	6.74725	11.8357	0.920641	NM_006135,BX648738	chr1:113144301-113214213	NC_000001.10	+	113144301
3838665	4.74e-08	1.04e-09	6.74472	11.824	1.14255	NM_020650,AY195859	chr19:50030875-50050203	NC_000019.9	+	50030875
3980907	4.74e-08	1.04e-09	6.74441	11.8227	0.971683		control		---	0
3373630	4.75e-08	1.05e-09	6.74374	11.8196	0.898015	NM_005161,NR_027991,BC032688	chr11:56969843-57019430	NC_000011.9	-	56969843
2454532	4.79e-08	1.06e-09	6.74159	11.8097	1.06422	NM_015434,BC030716,BC033918,BC020523,AK297225,BC036009	chr1:212113689-212208990	NC_000001.10	-	212113689
2436145	4.86e-08	1.08e-09	6.73773	11.792	1.10972		control		---	0
3236395	4.86e-08	1.08e-09	6.73762	11.7915	0.937602	NM_016299,AK292323	chr10:14879805-14913739	NC_000010.10	+	14879805
2435383	4.88e-08	1.09e-09	6.7359	11.7836	1.32863	NM_002966,BC105786	chr1:151922869-151999288	NC_000001.10	-	151922869
4016572	4.88e-08	1.09e-09	6.73555	11.782	1.14163	NM_001142418,NM_001142429,NM_012286,NM_001142424,NM_001142422,NM_001142423,NM_001142425,NM_001142428,NM_001142432,NM_001142419,NM_001142430,NM_001142427,NM_001142421,NM_001142426,NM_001142431,NM_001142420,AK126427	chrX:102930458-102957622	NC_000023.10	-	102930458
3738629	4.89e-08	1.09e-09	6.73483	11.7787	1.00963	NM_001042422,NM_004207,NM_001042423,AK127319	chr17:80181985-80219016	NC_000017.10	+	80181985
3220977	4.94e-08	1.1e-09	6.73237	11.7675	1.01409	NM_005156,NM_001163790,NM_001163788,BC044585	chr9:114980719-115100035	NC_000009.11	-	114980719
2899206	5.16e-08	1.16e-09	6.72199	11.7199	1.22885	NM_003522,BC056264	chr6:26199758-26200952	NC_000006.11	+	26199758
2358743	5.16e-08	1.16e-09	6.72234	11.7215	0.852143	NM_024041,AK056322	chr1:151138478-151142763	NC_000001.10	+	151138478
2899772	5.18e-08	1.17e-09	6.72073	11.7141	1.28372	NM_080596,BC134366	chr6:27114908-27115336	NC_000006.11	+	27114908
3687789	5.18e-08	1.17e-09	6.72068	11.7139	1.0703	NM_024096,BC001344	chr16:30431804-30441376	NC_000016.9	-	30431804
2374872	5.23e-08	1.18e-09	6.71802	11.7017	0.971751	NM_018085,AF410465	chr1:201798251-201847444	NC_000001.10	+	201798251
3548788	5.26e-08	1.19e-09	6.71621	11.6934	0.910005	NM_017437,BC070095	chr14:92583284-92708331	NC_000014.8	+	92583284
3476665	5.31e-08	1.2e-09	6.71389	11.6828	0.830171	NM_005505,NM_001082959,BC080647	chr12:125148277-125364997	NC_000012.11	-	125148277
3487095	5.37e-08	1.22e-09	6.71122	11.6706	1.18651	NM_178009,NM_152910,AB078968,AK090591	chr13:42622931-42817026	NC_000013.10	+	42622931
3766373	5.44e-08	1.24e-09	6.70806	11.6561	0.813615	NM_017647,BC036710	chr17:61896486-61905021	NC_000017.10	-	61896486
3264997	5.46e-08	1.24e-09	6.70694	11.651	1.85987	NM_001193434,NM_001193435,NM_024889,NM_182601,AK126354	chr10:115511223-115543188	NC_000010.10	+	115511223
2856995	5.54e-08	1.27e-09	6.70242	11.6303	1.138	NM_007036,NM_001135604,BC011989	chr5:54235723-54281642	NC_000005.9	-	54235723
3878220	5.54e-08	1.27e-09	6.70283	11.6322	1.02211	BC016869,AF306685,AF306686,BX647404	chr20:17948912-17971759	NC_000020.10	+	17948912
2780172	5.54e-08	1.27e-09	6.70286	11.6324	0.857383	NM_001813	chr4:104026970-104119566	NC_000004.11	-	104026970
2367843	5.67e-08	1.3e-09	6.69706	11.6058	0.927292	NM_018122,NM_001127181,NM_033319,BC045173	chr1:173791783-173829867	NC_000001.10	+	173791783
2437247	5.69e-08	1.31e-09	6.6959	11.6005	0.869304	NM_001005741,NM_001005742,NM_000157,NM_001171812,NM_001171811,AK291911,AK090514	chr1:155201067-155214569	NC_000001.10	-	155201067
3417309	5.71e-08	1.32e-09	6.69486	11.5958	0.922424	NM_006191,BC001951	chr12:56498299-56507689	NC_000012.11	+	56498299
2541944	5.72e-08	1.32e-09	6.69388	11.5913	1.08346	NM_001142286,NM_024624,BC039828	chr2:17844930-17939919	NC_000002.11	-	17844930
2723710	5.88e-08	1.36e-09	6.68757	11.5624	1.02793	NM_018290,AF109360	chr4:37787358-37864540	NC_000004.11	+	37787358
2732273	5.93e-08	1.38e-09	6.68546	11.5528	1.01368	NM_018243,BC064934	chr4:77828245-77961308	NC_000004.11	+	77828245
2396461	6.08e-08	1.41e-09	6.67979	11.5269	0.882738	NM_003132,M34338	chr1:11114649-11120100	NC_000001.10	-	11114649
4017810	6.15e-08	1.43e-09	6.67678	11.5131	1.08543	NM_022977,NM_004458,AF030555	chrX:108871330-108976933	NC_000023.10	-	108871330
3988874	6.3e-08	1.47e-09	6.67136	11.4883	0.967895	NM_003336,NM_181762,NM_181777,AK301675	chrX:118708480-118718377	NC_000023.10	+	118708480
3326635	6.31e-08	1.48e-09	6.67047	11.4843	1.15578	NM_000610,NM_001001389,NM_001001390,NM_001001391,NM_001001392,BC004372,AY101192,AL832642,EF581837,AK290424,BC052287,AY101193,BC067348,U40373,FJ216964,M59040,AK297776,M24915,AK304467,AF098641,M25078,AK123567,M83328,U94903	chr11:35160427-35253933	NC_000011.9	+	35160427
3044129	6.35e-08	1.49e-09	6.66837	11.4747	1.00419	NM_024051,BC019243,BC013937,BC000625,BC005356,AK021779	chr7:30536240-30544461	NC_000007.13	-	30536240
3662150	6.35e-08	1.49e-09	-6.66849	11.4752	-2.26308	NM_176870,BC028280,BC103840	chr16:56665889-56667888	NC_000016.9	+	56665889
4045643	6.36e-08	1.5e-09	6.66748	11.4706	1.29474	NM_080388,AY762098	chr1:153562061-153585626	NC_000001.10	-	153562061
3783481	6.39e-08	1.51e-09	6.6661	11.4643	1.66886	NM_001944,AK290367	chr18:29027722-29058655	NC_000018.9	+	29027722
3518977	6.44e-08	1.52e-09	6.66431	11.4562	1.11264	NM_024546,BC136764	chr13:79188426-79234690	NC_000013.10	-	79188426
3704980	6.8e-08	1.61e-09	6.6521	11.4004	0.847071	NM_000135,NM_001018112,X99226	chr16:89803967-89900765	NC_000016.9	-	89803967
2949330	6.86e-08	1.63e-09	6.64933	11.3878	0.966721	NM_001288,AF034607	chr6:31698386-31707165	NC_000006.11	-	31698386
3570141	6.86e-08	1.63e-09	-6.64942	11.3882	-1.07188		control		---	0
2514566	6.89e-08	1.64e-09	6.64802	11.3818	0.949958	NM_003142,X69804	chr2:170648439-170669022	NC_000002.11	+	170648439
4022781	6.95e-08	1.66e-09	6.64585	11.3719	0.92846	NM_001166599,NM_001170756,NM_145284,NM_001166600,NM_001170757,BC110846	chrX:133847851-133931235	NC_000023.10	-	133847851
2692060	6.99e-08	1.67e-09	6.6443	11.3649	1.13201	NM_001146106,NM_031458,NM_001146102,NM_001146104,NM_001146103,NM_001146105,AF307338	chr3:122246779-122283503	NC_000003.11	-	122246779
3772158	7.02e-08	1.68e-09	6.64306	11.3592	0.864	NM_003258,K02581	chr17:76169241-76188886	NC_000017.10	-	76169241
3665116	7.12e-08	1.71e-09	6.63949	11.3429	0.990584	NM_001755,NM_022845,BC018509	chr16:67063021-67134956	NC_000016.9	+	67063021
2809831	7.18e-08	1.73e-09	6.63729	11.3329	1.43274	NM_001008397,AK074216	chr5:54455946-54469622	NC_000005.9	+	54455946
3463522	7.3e-08	1.76e-09	6.63352	11.3157	1.10643	NM_002583,U63809	chr12:79978659-80099530	NC_000012.11	-	79978659
2639054	7.36e-08	1.77e-09	6.63131	11.3057	1.05834	NM_017554,BX648758	chr3:122398047-122449684	NC_000003.11	+	122398047
2365958	7.44e-08	1.8e-09	6.62855	11.2931	0.886916	NM_003953,NM_024569,NM_001146191,AY359019	chr1:167691214-167760397	NC_000001.10	+	167691214
2993651	7.59e-08	1.84e-09	6.62401	11.2724	1.55243		control		---	0
3514849	7.71e-08	1.87e-09	6.62019	11.255	1.03387	NM_002498,NM_152720,NR_027415,NM_001146099,AK290259	chr13:52706791-52733932	NC_000013.10	-	52706791
3311832	7.75e-08	1.88e-09	6.61858	11.2477	1.30479	NM_003474,NM_021641,AF023476	chr10:127700966-128077055	NC_000010.10	-	127700966
3652902	7.76e-08	1.89e-09	-6.61794	11.2448	-1.19661	NM_000336,BC036352	chr16:23266091-23392614	NC_000016.9	+	23266091
3874249	7.85e-08	1.91e-09	6.61521	11.2323	0.755525	NM_033453,NM_181493,AF026816	chr20:3184779-3204500	NC_000020.10	+	3184779
3151401	7.87e-08	1.92e-09	6.61404	11.227	0.954738	NM_024295,NM_001134671,AY358818	chr8:124025424-124054600	NC_000008.10	-	124025424
3107661	7.88e-08	1.93e-09	6.61354	11.2247	0.909497	NM_017864,AB161944	chr8:95835523-95897519	NC_000008.10	+	95835523
3427876	8.16e-08	2e-09	6.60568	11.1889	0.987507	NM_181861,NM_013229,NM_181868,NM_001160,NM_181869,AF013263	chr12:99038957-99133736	NC_000012.11	+	99038957
3933550	8.23e-08	2.02e-09	-6.6034	11.1786	-2.69164	NM_005423,BC032820	chr21:43766472-43771188	NC_000021.8	-	43766472
3182199	8.55e-08	2.11e-09	6.5948	11.1395	0.943397	AY598327,BC008993,AK092292	chr9:103188939-103214541	NC_000009.11	+	103188939
3381879	8.77e-08	2.17e-09	6.5887	11.1117	1.18169	NM_182904,AY313448	chr11:73946866-74022712	NC_000011.9	-	73946866
3391769	8.77e-08	2.16e-09	6.58917	11.1138	0.911427	NM_004724,BC128264	chr11:113603936-113644473	NC_000011.9	-	113603936
2545478	8.83e-08	2.19e-09	6.58685	11.1033	1.15641	NM_006569,NM_001166239,NM_001166240,BC034764	chr2:27320788-27343069	NC_000002.11	-	27320788
3939470	8.84e-08	2.19e-09	6.58621	11.1004	1.00777	NM_005940,AK125911	chr22:24110423-24126501	NC_000022.10	+	24110423
2425756	8.86e-08	2.2e-09	6.58527	11.0961	1.03896	NM_001854,NM_080629,NM_001190709,NM_080630,J04177	chr1:103341694-103574616	NC_000001.10	-	103341694
2691850	8.91e-08	2.22e-09	6.58374	11.0892	0.945204	NM_175924,BC044240,AY672837,AY672838,AY672839,AY134857,AK129974	chr3:121699701-121741117	NC_000003.11	-	121699701
3980898	9.05e-08	2.26e-09	6.57991	11.0718	1.07218		control		---	0
3685329	9.23e-08	2.31e-09	6.57536	11.0511	0.862858	NM_024675,BC044254	chr16:23614489-23652645	NC_000016.9	-	23614489
3761420	9.35e-08	2.34e-09	6.57226	11.037	0.816317	NM_004502,NR_029582,AK223249	chr17:46679967-46711394	NC_000017.10	-	46679967
3699044	9.53e-08	2.39e-09	6.56772	11.0164	0.97752	NM_018124,AK291200	chr16:74655298-74700782	NC_000016.9	-	74655298
2438482	9.53e-08	2.39e-09	6.56733	11.0147	0.875581	NM_030980,AK095697	chr1:156690667-156698450	NC_000001.10	-	156690667
2386747	9.59e-08	2.41e-09	6.56575	11.0075	1.01167	NM_003272,AF027826,BC012100,AY242135,AK301552,AK295408,CR541770,AK056945,CR602894	chr1:236305827-236385145	NC_000001.10	+	236305827
3225003	9.72e-08	2.45e-09	6.56246	10.9925	0.986733	NM_002799,D38048	chr9:127115759-127183463	NC_000009.11	-	127115759
3483348	9.86e-08	2.49e-09	6.55887	10.9762	1.01879	NM_015932,BC014334	chr13:29227188-29253050	NC_000013.10	+	29227188
2436155	9.88e-08	2.5e-09	6.55808	10.9726	1.05053		control		---	0
3335029	9.91e-08	2.51e-09	6.55718	10.9686	0.850726	NM_002689,BC002990	chr11:65029256-65078247	NC_000011.9	+	65029256
3666732	1.01e-07	2.56e-09	6.55307	10.9499	1.09826	NM_030579,BC014431,BC004373,AK291576,AB009282,BX647922	chr16:69458451-69569525	NC_000016.9	+	69458451
4020444	1.01e-07	2.58e-09	6.55112	10.9411	0.976495	NM_001081550,AF441770	chrX:122734422-122866959	NC_000023.10	-	122734422
2988882	1.01e-07	2.56e-09	6.5527	10.9483	0.770588	NM_006303,NM_014413,NM_001134335,BC013630	chr7:6048882-6064267	NC_000007.13	+	6048882
2966636	1.02e-07	2.59e-09	6.55015	10.9367	1.00822	NM_006828,NM_022091,BC026066	chr6:100920650-101337911	NC_000006.11	-	100920650
3980913	1.06e-07	2.73e-09	6.53946	10.8882	1.13267		control		---	0
3757433	1.06e-07	2.72e-09	6.53985	10.89	1.06013	NM_001096,NM_198830,BC006195	chr17:40023181-40075414	NC_000017.10	-	40023181
3828112	1.07e-07	2.75e-09	6.53802	10.8817	1.63474	NM_001238,NM_057182,BC035498	chr19:30266915-30392967	NC_000019.9	+	30266915
2440943	1.07e-07	2.77e-09	6.53631	10.8739	1.3277	NM_000569,NM_001127592,NM_001127593,NM_001127595,NM_001127596,NM_000570,BC036723,M24854	chr1:161500408-161627141	NC_000001.10	-	161500408
3716579	1.07e-07	2.75e-09	6.53767	10.8801	0.985876	NR_015341,NR_033420,NR_033412,NR_027418,AK124759	chr17:28900604-29013766	NC_000017.10	+	28900604
2400177	1.08e-07	2.79e-09	6.53497	10.8679	1.10494	NM_018584,AY204901	chr1:20808890-20812693	NC_000001.10	-	20808890
3511698	1.09e-07	2.81e-09	6.53339	10.8607	1.17568	NM_001002264,NM_033255,BC023660	chr13:43411603-43566520	NC_000013.10	-	43411603
3977067	1.09e-07	2.83e-09	6.53136	10.8515	1.04708	NM_002668,L09604	chrX:49028219-49031561	NC_000023.10	+	49028219
3550485	1.09e-07	2.84e-09	6.53044	10.8473	1.00796	NM_003384,AK290110	chr14:97098081-97455565	NC_000014.8	+	97098081
3971329	1.09e-07	2.81e-09	6.53275	10.8578	0.950545	NM_015884,NM_206923,AK292933,BC137215	chrX:21857677-21909263	NC_000023.10	+	21857677
2571075	1.13e-07	2.93e-09	6.52409	10.8186	0.985153	NM_022662,BC104902	chr2:112522690-112641768	NC_000002.11	-	112522690
2398894	1.16e-07	3.03e-09	6.51683	10.7857	0.82294	NM_018715,NM_001136204,AJ421269	chr1:17733276-17787445	NC_000001.10	-	17733276
3040518	1.2e-07	3.14e-09	6.50919	10.7512	1.41196	NM_182762,BC137090	chr7:19958604-20279318	NC_000007.13	-	19958604
3178147	1.2e-07	3.16e-09	6.508	10.7457	1.1511	NM_001912,NM_145918,NR_033405,AK055599,L25629	chr9:90340444-90462468	NC_000009.11	+	90340444
3632298	1.2e-07	3.16e-09	6.50824	10.7469	0.846442	NR_023318,NM_031284,NR_023319,AF204270	chr15:73028302-73078165	NC_000015.9	-	73028302
3465248	1.21e-07	3.19e-09	6.50588	10.7362	1.7272	NM_002345,BC007038	chr12:91496423-91505588	NC_000012.11	-	91496423
3997780	1.21e-07	3.21e-09	6.50442	10.7296	1.33595	NM_000047,AK301004	chrX:2852673-2882344	NC_000023.10	-	2852673
2852591	1.21e-07	3.19e-09	6.50576	10.7356	0.909909	NM_030955,AJ250725	chr5:33517905-33934115	NC_000005.9	-	33517905
2667809	1.21e-07	3.19e-09	6.50571	10.7354	0.816475	NM_017784,NM_001174060,AF392451	chr3:31699392-32023346	NC_000003.11	-	31699392
2487063	1.21e-07	3.19e-09	-6.50608	10.7371	-3.60792	NM_019617,AB039886	chr2:69201705-69219855	NC_000002.11	+	69201705
3980895	1.22e-07	3.22e-09	6.50362	10.7259	1.32868		control		---	0
2555490	1.22e-07	3.25e-09	6.50167	10.7171	1.08872	NM_003400,D89729,BC032847,AK289920,AK316481,AK299039,AL833550,AK124769,AK094339,AK098297	chr2:61704986-61765839	NC_000002.11	-	61704986
3976124	1.22e-07	3.23e-09	6.50298	10.723	0.772146	NM_006201,NM_033018,NM_001170460,BC015607	chrX:47077632-47089392	NC_000023.10	+	47077632
3008144	1.25e-07	3.34e-09	6.4959	10.691	1.12695	NM_022170,NM_031992,BC021214	chr7:73588633-73611422	NC_000007.13	+	73588633
3556990	1.25e-07	3.32e-09	6.49736	10.6976	0.89705	NM_032876,NM_198086,BC034968	chr14:23436698-23451856	NC_000014.8	-	23436698
2936564	1.26e-07	3.36e-09	6.49453	10.6849	0.785714	NM_007045,NM_194429,AK289846,BX647686	chr6:167412670-167504022	NC_000006.11	+	167412670
2946194	1.27e-07	3.39e-09	6.49281	10.6771	1.6096	NM_005325,BC101593	chr6:26017260-26018179	NC_000006.11	-	26017260
3041409	1.31e-07	3.54e-09	6.48363	10.6356	1.23915	NM_006547,AF117108,AK127742	chr7:23349834-23510004	NC_000007.13	-	23349834
3980917	1.31e-07	3.54e-09	6.4836	10.6355	1.10424		control		---	0
3676694	1.31e-07	3.51e-09	6.48521	10.6427	1.02372		control		---	0
2356721	1.31e-07	3.5e-09	6.48603	10.6464	0.857569	NM_004284,AF537213	chr1:146714354-146767442	NC_000001.10	+	146714354
2406256	1.32e-07	3.56e-09	6.4825	10.6305	1.02113		control		---	0
2993649	1.35e-07	3.67e-09	6.47558	10.5992	1.40406		control		---	0
2949068	1.35e-07	3.64e-09	6.47732	10.6071	1.04773		control		---	0
3715874	1.35e-07	3.65e-09	6.47703	10.6058	0.91104	NM_005702,BX537542	chr17:27129468-27188069	NC_000017.10	+	27129468
2436156	1.36e-07	3.71e-09	6.47366	10.5906	1.17972		control		---	0
3888474	1.37e-07	3.72e-09	6.47285	10.5869	0.781795	NM_018683,BC066919	chr20:48552914-48570411	NC_000020.10	+	48552914
3354764	1.38e-07	3.75e-09	6.47104	10.5787	0.953977	NM_152713,BC020965	chr11:125462733-125492650	NC_000011.9	+	125462733
3232349	1.38e-07	3.77e-09	6.47015	10.5747	0.944629	NM_002627,AK092597	chr10:3109707-3179887	NC_000010.10	+	3109707
3414632	1.39e-07	3.79e-09	6.46891	10.5691	0.890739	NM_173602,AK094890	chr12:51074455-51142424	NC_000012.11	+	51074455
4001850	1.41e-07	3.87e-09	6.4644	10.5488	0.905556	NM_031892,NM_001024666,NM_001184960,NM_001001671,AF230904	chrX:19504847-19905815	NC_000023.10	-	19504847
3903361	1.42e-07	3.89e-09	6.46349	10.5447	0.8965	NM_000687,NM_001161766,BC010018	chr20:32822649-32899598	NC_000020.10	-	32822649
3652867	1.43e-07	3.94e-09	-6.46029	10.5302	-1.58068	NM_001039,BC059391	chr16:23193578-23228201	NC_000016.9	+	23193578
2633631	1.46e-07	4.02e-09	6.45616	10.5116	0.784946	NM_020202,AK225979	chr3:100053483-100075700	NC_000003.11	+	100053483
2598261	1.47e-07	4.08e-09	6.45319	10.4982	1.63886	NM_212482,NM_002026,NM_212476,NM_212478,NM_212474,NM_054034,BX640731	chr2:216225174-216330343	NC_000002.11	-	216225174
2512701	1.47e-07	4.04e-09	6.45506	10.5066	0.986402	NM_005805,AK055128,AK128460	chr2:162164559-162268225	NC_000002.11	+	162164559
3119945	1.47e-07	4.05e-09	6.45468	10.5049	0.962715	NM_000837,NM_001009184,AK127640	chr8:145063932-145067562	NC_000008.10	+	145063932
3515009	1.47e-07	4.07e-09	6.45352	10.4997	0.901194	NM_016075,BX647847	chr13:52986748-53029452	NC_000013.10	-	52986748
3474104	1.47e-07	4.08e-09	6.45285	10.4967	0.776873	NM_007174,AY681966	chr12:120118832-120347860	NC_000012.11	-	120118832
3262198	1.49e-07	4.16e-09	6.44898	10.4792	0.914663	NM_014976,D80007	chr10:105155620-105206041	NC_000010.10	+	105155620
2993656	1.5e-07	4.17e-09	6.44816	10.4755	1.29449		control		---	0
2738314	1.51e-07	4.21e-09	6.44634	10.4673	0.884664	NM_001031720,NM_024751,BC032942	chr4:106629753-106768881	NC_000004.11	+	106629753
3127703	1.56e-07	4.38e-09	6.43766	10.4282	0.946004	NM_003842,NM_147187,NR_027140,AF016266	chr8:22877651-22928217	NC_000008.10	-	22877651
3375951	1.56e-07	4.38e-09	6.43793	10.4294	0.887565	NM_198335,NM_198334,BC065266	chr11:62392306-62414118	NC_000011.9	-	62392306
3259087	1.56e-07	4.36e-09	-6.43859	10.4324	-1.17619	NM_207321,AK126134,BC112988	chr10:96951414-96990766	NC_000010.10	+	96951414
3989089	1.57e-07	4.41e-09	6.43622	10.4217	0.76403	NM_001184742,NM_006777,BC042753	chrX:119378531-119392247	NC_000023.10	+	119378531
3979762	1.58e-07	4.46e-09	6.43376	10.4106	1.47477	NM_138737,NM_001130860,NM_014799,BC011561,AY358990,AF148860,AK294278,AK316231,AK295456,AF075034,AJ296162,AK022472,AK311043	chrX:65382663-65629232	NC_000023.10	+	65382663
3256560	1.58e-07	4.44e-09	6.43469	10.4148	0.999132	NM_004897,NM_001178118,NM_001178117,AY358938	chr10:89263942-89313198	NC_000010.10	+	89263942
2993644	1.62e-07	4.56e-09	6.42896	10.389	1.34634		control		---	0
2993650	1.66e-07	4.69e-09	6.42303	10.3623	1.51279		control		---	0
2544201	1.67e-07	4.73e-09	6.42119	10.354	0.926992	NM_004881,NM_147184,AK223382	chr2:24300308-24308065	NC_000002.11	-	24300308
2887164	1.68e-07	4.76e-09	6.41991	10.3483	1.19212	NM_001017995,DQ109556	chr5:171752194-171881517	NC_000005.9	-	171752194
3140920	1.68e-07	4.78e-09	6.4189	10.3437	1.11767	NM_020647,BC140875	chr8:75146942-75233705	NC_000008.10	-	75146942
3457824	1.7e-07	4.83e-09	6.41649	10.3329	0.897728	NM_003920,BC050557	chr12:56810167-56843192	NC_000012.11	-	56810167
3728889	1.72e-07	4.9e-09	6.41359	10.3199	1.01052	NM_030938,NR_029493,NM_004859,BC009758,AY699265	chr17:57183896-57919596	NC_000017.10	+	57183896
2409104	1.72e-07	4.91e-09	6.41309	10.3176	1.00224	NM_006516,AK292791	chr1:43352207-43565742	NC_000001.10	-	43352207
2320069	1.72e-07	4.92e-09	6.41251	10.315	0.728434		control		---	0
3557851	1.73e-07	4.95e-09	6.41145	10.3102	0.727424	NM_024658,BC110804	chr14:24649263-24658104	NC_000014.8	-	24649263
3485863	1.74e-07	4.99e-09	6.4097	10.3023	0.940234	NM_181503,AK096810	chr13:37572953-37583750	NC_000013.10	+	37572953
2378180	1.75e-07	5.03e-09	6.408	10.2947	0.825233	NM_014388,AK289613	chr1:209975317-210045906	NC_000001.10	+	209975317
4026669	1.77e-07	5.1e-09	6.40486	10.2806	1.098	NM_001139457,NR_024450,NM_005745,NM_001139441,BC065292,BC014323	chrX:152965956-152990152	NC_000023.10	-	152965956
3515965	1.77e-07	5.09e-09	6.40543	10.2831	0.966289	NM_001042517,NM_030932,AY750055,AB244756,AY818645,AB244758,AB244757,BC048963,BC068504,BC034952,BC041395,AK054589,AL137718	chr13:60239729-60745674	NC_000013.10	-	60239729
3997825	1.79e-07	5.2e-09	6.40054	10.2612	1.08629	NM_015419,AF245505	chrX:3054267-3264681	NC_000023.10	-	3054267
2353283	1.79e-07	5.16e-09	6.40249	10.2699	1.04866	NM_138959,NM_001172412,NM_001172411,BC000907	chr1:116235521-116236729	NC_000001.10	+	116235521
3784783	1.79e-07	5.17e-09	6.40177	10.2667	0.994764	NM_017947,BC012079	chr18:33767382-33854206	NC_000018.9	+	33767382
2691014	1.79e-07	5.18e-09	6.40159	10.2659	0.73011	NM_002093,NM_001146156,BC012760,AK126260	chr3:119535829-119814452	NC_000003.11	-	119535829
3733238	1.79e-07	5.17e-09	-6.40178	10.2667	-1.68732	NM_170742,NM_018658,NM_170741,BC033038	chr17:68071397-68131741	NC_000017.10	+	68071397
3369366	1.82e-07	5.3e-09	-6.39675	10.2441	-1.10613	NM_004171,NM_001195728,AY066021	chr11:35259698-35442682	NC_000011.9	-	35259698
2811656	1.84e-07	5.36e-09	6.39394	10.2315	0.949757	NM_001098511,NM_004520,EF560716	chr5:61578011-61686850	NC_000005.9	+	61578011
3801264	1.85e-07	5.41e-09	6.39228	10.224	0.995047	NM_032933,AK123623	chr18:20756810-21017925	NC_000018.9	-	20756810
3676693	1.85e-07	5.39e-09	6.39272	10.226	0.94481		control		---	0
3815165	1.85e-07	5.41e-09	6.39198	10.2227	0.847034	NM_002819,NM_031990,NM_031991,NM_175847,AB208910	chr19:796768-812505	NC_000019.9	+	796768
2394588	1.88e-07	5.51e-09	6.38824	10.2059	0.750325	NM_012405,BC017037	chr1:6281279-6301892	NC_000001.10	-	6281279
2807359	1.89e-07	5.57e-09	6.38591	10.1954	1.25447	NM_003999,NM_001168355,U60805,BC125209,BC125210,AK304016,BC010943,BC063468	chr5:38734214-38945215	NC_000005.9	+	38734214
3904527	1.89e-07	5.55e-09	6.38678	10.1993	0.923899	NM_032013,NM_022477,AB044943	chr20:35280176-35374495	NC_000020.10	-	35280176
3476097	1.92e-07	5.65e-09	6.38284	10.1817	0.91882	NM_004642,AF006484	chr12:123745523-123756855	NC_000012.11	-	123745523
2700365	1.94e-07	5.75e-09	6.37911	10.1649	1.22033	NM_014220,AL832780	chr3:149085028-149095580	NC_000003.11	-	149085028
2419235	1.94e-07	5.74e-09	6.37929	10.1657	0.940419	NM_003902,AB209366	chr1:78409742-78445293	NC_000001.10	-	78409742
3048749	1.94e-07	5.71e-09	6.38035	10.1705	0.848566	NM_019082,AK125595	chr7:44604979-44613837	NC_000007.13	-	44604979
3980908	1.95e-07	5.8e-09	6.37715	10.1561	1.15011		control		---	0
2436147	1.95e-07	5.78e-09	6.37778	10.1589	1.00577		control		---	0
3263790	1.95e-07	5.77e-09	6.37807	10.1603	0.968183	NM_005445,AK289771	chr10:112327049-112375493	NC_000010.10	+	112327049
3886179	1.97e-07	5.85e-09	6.37504	10.1466	0.867971	NM_016004,BC039831	chr20:42219571-42275936	NC_000020.10	+	42219571
2733767	1.98e-07	5.89e-09	6.37376	10.1409	0.849825	NM_021204,BC065815	chr4:83351261-83411469	NC_000004.11	+	83351261
3499453	2.02e-07	6.03e-09	6.36874	10.1184	0.845676	NM_003291,M73047	chr13:103183580-103333172	NC_000013.10	+	103183580
3742285	2.03e-07	6.07e-09	6.36707	10.1109	1.07048	NM_022059,NM_001100812,AF301016	chr17:4636209-4643215	NC_000017.10	-	4636209
3432754	2.03e-07	6.06e-09	6.36741	10.1124	0.777182	NM_173542,NM_001159727,BC030618	chr12:113796368-113829422	NC_000012.11	+	113796368
2604254	2.04e-07	6.12e-09	6.36558	10.1042	0.964027	NM_018410,AB101211	chr2:234742137-234763192	NC_000002.11	-	234742137
3729172	2.04e-07	6.11e-09	6.36572	10.1048	0.944112	NM_004859,BC054489	chr17:57697239-57772517	NC_000017.10	+	57697239
3332780	2.05e-07	6.16e-09	-6.36416	10.0979	-3.76539	NM_001079808,NM_014224,NM_001079807,BC029055,AK291864,AK225679	chr11:60970799-61018916	NC_000011.9	+	60970799
2328486	2.06e-07	6.2e-09	6.36273	10.0914	0.882978		control		---	0
2434129	2.1e-07	6.35e-09	6.35748	10.0679	1.26791	NM_175065	chr1:149858519-149860250	NC_000001.10	-	149858519
3908963	2.11e-07	6.38e-09	6.35654	10.0637	0.883304	NM_004776,AB004550	chr20:48249482-48376302	NC_000020.10	-	48249482
3448428	2.15e-07	6.51e-09	6.35203	10.0435	1.17464	NM_018164,BC003081	chr12:27058010-27091234	NC_000012.11	-	27058010
3647504	2.15e-07	6.51e-09	6.35213	10.0439	0.912158	NM_000303,U85773	chr16:8891470-8943163	NC_000016.9	+	8891470
3645555	2.17e-07	6.6e-09	6.34924	10.031	0.980777	NM_016639,BC002718	chr16:3070333-3072379	NC_000016.9	+	3070333
3918447	2.18e-07	6.62e-09	6.34829	10.0267	1.03045	NM_207585,NM_000874,NM_207584,L41944	chr21:34451264-34635805	NC_000021.8	+	34451264
3143970	2.2e-07	6.71e-09	6.34554	10.0144	1.06628	NM_002485,BC146797	chr8:90945569-90997257	NC_000008.10	-	90945569
3421897	2.2e-07	6.69e-09	6.34608	10.0168	0.919853	NM_014515,AK095789	chr12:70615556-70748768	NC_000012.11	+	70615556
3223687	2.29e-07	6.99e-09	6.33679	9.97526	0.904479	NM_015651,NM_001009936,BX640713	chr9:123617160-123657262	NC_000009.11	-	123617160
3064541	2.39e-07	7.32e-09	6.32667	9.92997	0.864814	NM_001084,BC011674	chr7:100849285-100861142	NC_000007.13	-	100849285
2436160	2.42e-07	7.42e-09	6.32369	9.91661	0.75139		control		---	0
3831143	2.43e-07	7.44e-09	6.32317	9.9143	0.913718	NM_001281,NM_006233,AF013488,BC067794	chr19:36605438-36616825	NC_000019.9	+	36605438
3145586	2.45e-07	7.55e-09	6.31993	9.89981	1.05958	NM_015942,BC012995	chr8:97251654-97273893	NC_000008.10	-	97251654
3225398	2.45e-07	7.53e-09	6.32051	9.9024	0.902762	NM_005347,BC020235,BC112963	chr9:127997132-128024769	NC_000009.11	-	127997132
3188050	2.46e-07	7.57e-09	6.31945	9.89767	0.824827	NM_138777,NM_001173512,NM_199177,AK291809,AK292790,AK300718,AK291603,BC013049,BC053604,AK298046,AK316266,BC002814,CR612198,AK310974	chr9:125026795-125086401	NC_000009.11	+	125026795
2951674	2.48e-07	7.66e-09	6.31669	9.88535	1.0448	NR_034069,NM_003137,AJ318054	chr6:35800763-35888964	NC_000006.11	-	35800763
3367036	2.49e-07	7.68e-09	6.31632	9.88367	0.913759	NM_030771,NM_080654,BC008496	chr11:27239583-27385405	NC_000011.9	-	27239583
2640855	2.51e-07	7.76e-09	6.31387	9.87272	0.763722	NM_004526,BC014272	chr3:127308674-127341270	NC_000003.11	+	127308674
3333247	2.53e-07	7.83e-09	6.31213	9.86493	0.999456	NM_004265,AF108658	chr11:61583718-61636015	NC_000011.9	+	61583718
2744597	2.64e-07	8.21e-09	6.30184	9.81896	0.899682	NM_057175,AF327722	chr4:140222641-140341177	NC_000004.11	+	140222641
3075531	2.67e-07	8.28e-09	6.29982	9.80996	0.908105	NM_080660,BC008842	chr7:138664733-138720506	NC_000007.13	-	138664733
3504434	2.71e-07	8.43e-09	6.29591	9.79252	0.999025	NM_022459,BC113571	chr13:21353014-21477187	NC_000013.10	-	21353014
2849469	2.77e-07	8.64e-09	6.29056	9.76863	0.861511	NM_054027,AY358503	chr5:14704920-14871876	NC_000005.9	-	14704920
3336554	2.81e-07	8.77e-09	6.28741	9.75459	0.737519	NM_005133,NM_001032279,NM_024650,AL713740	chr11:66610541-66614029	NC_000011.9	+	66610541
3690154	2.83e-07	8.84e-09	6.28566	9.74676	1.15427	NM_018092,AY358718	chr16:47114787-47178120	NC_000016.9	-	47114787
2603460	2.84e-07	8.91e-09	6.28401	9.7394	0.987053	NM_005381,NR_002908,NR_002921,NR_004398,AK128584	chr2:232319469-232372334	NC_000002.11	-	232319469
3642765	2.84e-07	8.89e-09	-6.28449	9.74153	-1.67467	NM_006849,Z84717	chr16:333910-337208	NC_000016.9	+	333910
3591909	2.9e-07	9.1e-09	6.27946	9.71912	0.901154	NM_016396,BC035744	chr15:44719542-44820420	NC_000015.9	+	44719542
2376548	3e-07	9.42e-09	-6.27191	9.68544	-1.65651	NM_181644,AK293816	chr1:205538125-205572505	NC_000001.10	+	205538125
3661718	3.01e-07	9.48e-09	6.27056	9.67945	1.00287	NM_017839,BC002472	chr16:55542620-55620575	NC_000016.9	+	55542620
2676182	3.01e-07	9.46e-09	6.27087	9.6808	0.864018	NM_022908,NM_001134231,BC014550	chr3:52558405-52571169	NC_000003.11	-	52558405
2571457	3.02e-07	9.53e-09	6.26935	9.67403	0.942653	NM_152515,AL832036,BC041437	chr2:113493799-113522638	NC_000002.11	-	113493799
3096545	3.03e-07	9.59e-09	6.26805	9.66825	0.905327	NM_032237,BC101548	chr8:42948661-42978323	NC_000008.10	+	42948661
2392985	3.03e-07	9.58e-09	-6.26815	9.66869	-0.931437	NR_015440,AL713743	chr1:2976183-2978853	NC_000001.10	-	2976183
3766861	3.13e-07	9.91e-09	6.26075	9.63574	0.945376	NM_007215,AF142992	chr17:62473667-62493169	NC_000017.10	-	62473667
3180263	3.13e-07	9.96e-09	6.25982	9.63157	0.944679	NM_032558,NR_002894,BC106062	chr9:97136853-97285933	NC_000009.11	+	97136853
3957445	3.14e-07	9.99e-09	6.25898	9.62785	0.836579	NR_036550,NM_014303,AK096320	chr22:30972623-31003107	NC_000022.10	-	30972623
3984536	3.15e-07	1e-08	6.25813	9.62408	0.780594	NM_001325,EU616679	chrX:100057895-100098514	NC_000023.10	+	100057895
3275729	3.18e-07	1.01e-08	6.25598	9.61451	1.1376	NM_000417,K03122	chr10:6052657-6104313	NC_000010.10	-	6052657
2436139	3.23e-07	1.03e-08	6.25236	9.59836	1.243		control		---	0
2907671	3.25e-07	1.04e-08	6.25066	9.59082	0.781259	NM_002821,NM_152880,NM_152882,NM_152881,BC071557,U40271,AF531868,AF531869,AF531872,AK292589,AF531871,U33635,AK291016,AK296953,AF531870,BC046109,AK296931,AB209350,AK131487,AK093428	chr6:43044026-43129449	NC_000006.11	+	43044026
2452754	3.26e-07	1.04e-08	-6.24961	9.58614	-1.36068	NM_052934,NM_134325,AF331525	chr1:205882180-205919688	NC_000001.10	-	205882180
2947095	3.32e-07	1.06e-08	6.24537	9.56727	1.30378	NM_003535	chr6:27858093-27858620	NC_000006.11	-	27858093
2783715	3.33e-07	1.07e-08	6.24369	9.55979	1.05143	NM_002358,BC005945	chr4:120904441-120988192	NC_000004.11	-	120904441
3144973	3.33e-07	1.07e-08	6.24345	9.55874	1.0347	NM_012415,AK290437	chr8:95365720-95487310	NC_000008.10	-	95365720
3216319	3.33e-07	1.07e-08	6.24364	9.55958	0.786889	NM_153695,AY554164	chr9:99148255-99180715	NC_000009.11	-	99148255
3482219	3.39e-07	1.09e-08	6.23951	9.54123	0.863592	NM_014089,NM_001008564,AK302946	chr13:25875258-25924202	NC_000013.10	+	25875258
3445574	3.41e-07	1.1e-08	6.23795	9.53429	1.7625	NM_004963,M73489	chr12:14765566-14887371	NC_000012.11	-	14765566
3487432	3.41e-07	1.1e-08	6.23751	9.53232	0.99518	NM_013238,BC095400,AK022087	chr13:43597339-43684860	NC_000013.10	+	43597339
2496727	3.43e-07	1.11e-08	6.23614	9.52621	0.845009	NM_145686,NM_145687,NM_004834,AK296396,AY212247,AK295610,AF096300,AY834276,AF085826,AK074592,AK074900,BC010909,BC054038,BC064691	chr2:102234064-102511448	NC_000002.11	+	102234064
2881239	3.48e-07	1.13e-08	6.23138	9.50505	1.01205	NM_002609,BC032224	chr5:149486428-149535440	NC_000005.9	-	149486428
3819572	3.48e-07	1.13e-08	6.23136	9.50496	0.924568		control		---	0
3513883	3.48e-07	1.13e-08	6.23137	9.50501	0.848671	NM_002267,BC035090	chr13:50273469-50367196	NC_000013.10	-	50273469
3272736	3.48e-07	1.13e-08	6.23147	9.50545	0.821984	NM_145806,AK091711,AK092113	chr10:135122403-135137750	NC_000010.10	+	135122403
3212332	3.48e-07	1.14e-08	6.23106	9.50363	0.622858		control		---	0
3150060	3.52e-07	1.15e-08	6.22862	9.49281	0.765942	NM_000127,BC001174	chr8:118811611-119124201	NC_000008.10	-	118811611
2770242	3.54e-07	1.16e-08	6.22687	9.485	0.937026	NM_002703,U00238	chr4:57259531-57334296	NC_000004.11	-	57259531
3624362	3.59e-07	1.18e-08	6.2236	9.47048	0.819671	NM_138792,AY302186	chr15:52230222-52263977	NC_000015.9	-	52230222
3829687	3.62e-07	1.19e-08	6.22119	9.45977	0.978831	NM_000175,NM_001184722,BC004982	chr19:34855728-34893318	NC_000019.9	+	34855728
3976062	3.62e-07	1.19e-08	6.22095	9.45874	0.816689	NM_003334,NM_153280,M58028	chrX:47049976-47074811	NC_000023.10	+	47049976
4022833	3.67e-07	1.21e-08	6.21741	9.443	0.96726	NM_019556,BC005700	chrX:134004678-134087156	NC_000023.10	-	134004678
2403557	3.67e-07	1.21e-08	6.21751	9.44345	0.862408	NR_002976,NR_003035,NR_002987,AK092096	chr1:28905063-28909485	NC_000001.10	-	28905063
3390180	3.68e-07	1.21e-08	6.21656	9.43921	0.933251	NM_153705,AY358616	chr11:108342855-108369093	NC_000011.9	-	108342855
3781429	3.68e-07	1.22e-08	6.21609	9.43715	0.898879	NM_002894,NM_203291,NM_203292,AF043431	chr18:20254350-20606650	NC_000018.9	+	20254350
3850069	3.68e-07	1.21e-08	6.21682	9.44036	0.745614	NM_001130823,NM_001379,X63692	chr19:10244029-10311848	NC_000019.9	-	10244029
2648873	3.75e-07	1.24e-08	6.21179	9.41807	0.840344	NM_003875,AK291504	chr3:155588345-155659171	NC_000003.11	+	155588345
3564790	3.76e-07	1.25e-08	6.21043	9.41204	1.0085	NM_014584,AF081886	chr14:53020449-53162649	NC_000014.8	-	53020449
2706297	3.77e-07	1.25e-08	6.21	9.41012	1.01078	NM_024665,AF268193,AF314544,BC113421,AK296946,BC048298,AF267864,BX648935,AK022956,BX648080,BC060320,BX640629,BC070134,BC070375	chr3:176639885-176919786	NC_000003.11	-	176639885
2474341	3.85e-07	1.28e-08	6.2052	9.38882	0.769472	NM_004341,BC065510	chr2:27440268-27468833	NC_000002.11	+	27440268
3392886	3.91e-07	1.3e-08	6.20117	9.37092	1.35335		control		---	0
2601021	3.91e-07	1.31e-08	6.20033	9.3672	0.930018	NM_005687,D84430,AK296100	chr2:223424572-223521054	NC_000002.11	-	223424572
3486728	3.91e-07	1.31e-08	6.20011	9.36624	0.874853	NM_014252,NR_030352,AF112968	chr13:41350921-41386592	NC_000013.10	+	41350921
2438282	3.91e-07	1.31e-08	6.20017	9.36648	0.837335	NM_178229,AB105103	chr1:156495197-156542396	NC_000001.10	-	156495197
4009238	3.92e-07	1.31e-08	6.19928	9.36256	0.803444	NM_006306,D80000	chrX:53401072-53449675	NC_000023.10	-	53401072
2438093	3.94e-07	1.32e-08	6.19805	9.3571	0.800295	NM_144580,BC011575	chr1:156258754-156265483	NC_000001.10	-	156258754
2462329	3.94e-07	1.32e-08	-6.19762	9.35518	-1.28756	NM_019891,BC044573	chr1:236378855-236495901	NC_000001.10	-	236378855
2773958	3.96e-07	1.33e-08	6.19635	9.34955	1.78431	NM_001565,BC010954	chr4:76932369-76944669	NC_000004.11	-	76932369
2326410	4.04e-07	1.36e-08	6.19173	9.32908	0.850525	NM_022778,BC064528	chr1:26560678-26605285	NC_000001.10	+	26560678
3145107	4.06e-07	1.37e-08	6.19036	9.32299	0.941141	NM_057749,AF091433	chr8:95892082-95930204	NC_000008.10	-	95892082
2370991	4.12e-07	1.39e-08	6.18682	9.30733	0.920037	NR_033302,NM_001357,BC137136	chr1:182808483-182857115	NC_000001.10	+	182808483
3854218	4.17e-07	1.41e-08	6.1837	9.29348	0.823372	NM_033417,NM_001011699,AK295994	chr19:17158314-17188926	NC_000019.9	-	17158314
2805078	4.18e-07	1.42e-08	6.18264	9.2888	0.896761	NM_004932,D31784	chr5:31193796-31325418	NC_000005.9	+	31193796
3909843	4.18e-07	1.42e-08	6.18254	9.28834	0.760093	NM_199427,NM_018197,NM_199426,NM_022088,BC012759,BC041622,BT009760,AK222712,AK022690	chr20:50700046-50808525	NC_000020.10	-	50700046
3310413	4.23e-07	1.44e-08	6.17956	9.27514	1.01119	NM_001001976,NM_007041,BC022026	chr10:123499950-123724629	NC_000010.10	-	123499950
3903670	4.23e-07	1.44e-08	6.1799	9.27664	0.793461	NM_000178,BC007927	chr20:33516268-33564133	NC_000020.10	-	33516268
2499053	4.24e-07	1.44e-08	6.17876	9.27163	1.07404	NM_001193485,NM_001193483,NM_001193484,NM_001193488,NM_001193482,NM_004987,NM_033514,AK304260,AK296992,AK302411,BC005341,U09284,AK316210,AK300833,AK298340,BC093812,BC112233,AF288404,AF527762,AF527763,AK096170,BC015843,AK310547	chr2:109150889-109544684	NC_000002.11	+	109150889
3239380	4.27e-07	1.46e-08	6.17671	9.26253	0.916353	NM_024838,BC035132	chr10:25305563-25315842	NC_000010.10	+	25305563
3562746	4.31e-07	1.47e-08	6.17482	9.25415	1.13641	NM_018353,BC065544	chr14:45672398-45722909	NC_000014.8	-	45672398
3345774	4.31e-07	1.47e-08	6.17431	9.25189	0.997131	NM_003772,AF004715	chr11:96123821-96126765	NC_000011.9	+	96123821
3096428	4.36e-07	1.49e-08	6.17162	9.24001	1.02057	NM_002027,NR_033698,AB209689	chr8:42911256-42940923	NC_000008.10	+	42911256
3666146	4.37e-07	1.5e-08	6.17077	9.23623	0.919103	NM_003983,NM_001076785,NM_032178,BC028216,AK091674	chr16:68298431-68335722	NC_000016.9	+	68298431
2328501	4.39e-07	1.51e-08	6.16895	9.22817	1.26828		control		---	0
3902682	4.39e-07	1.51e-08	6.16907	9.2287	0.977556	NM_002657,AF006005	chr20:30780314-30795623	NC_000020.10	-	30780314
3415320	4.43e-07	1.52e-08	6.16683	9.2188	1.43139	NM_005556,AK128505	chr12:52581323-52646431	NC_000012.11	+	52581323
3474502	4.47e-07	1.54e-08	6.16454	9.20868	1.07708	NM_003769,U30825	chr12:120888451-120922891	NC_000012.11	-	120888451
3474517	4.47e-07	1.54e-08	6.16454	9.20868	1.07708		control		---	0
3870824	4.5e-07	1.56e-08	6.1623	9.19877	0.951479	NM_002287,NM_021706,AK097869	chr19:54865254-54886770	NC_000019.9	-	54865254
3980892	4.5e-07	1.56e-08	6.16216	9.19816	0.932944		control		---	0
2436378	4.58e-07	1.59e-08	6.15815	9.18039	0.722359	NM_014437,BC014303,BC007886,BC002563,AK293389,BC003152,AK297983,AF151829,AF132942,AK300244,CR457217,AK074943,AK075257	chr1:153931621-153940188	NC_000001.10	-	153931621
2328502	4.73e-07	1.64e-08	6.15096	9.14862	0.900325		control		---	0
4000485	4.73e-07	1.64e-08	-6.15042	9.14623	-1.43332	NM_080873,NM_001012428,BX537853	chrX:15298049-15333768	NC_000023.10	-	15298049
3417500	4.75e-07	1.65e-08	6.14929	9.14125	1.48762	NM_173596,NM_001135195,BC027884,AK298331	chr12:56623863-56635255	NC_000012.11	+	56623863
3377897	4.75e-07	1.65e-08	6.14914	9.14058	0.898278		control		---	0
3156193	4.78e-07	1.67e-08	6.14723	9.13212	0.809561	NM_012154,NM_001164623,AY077717,AK092172	chr8:141530258-141656855	NC_000008.10	-	141530258
2773369	4.8e-07	1.68e-08	6.14595	9.1265	1.5945	NM_002994,BC008376	chr4:74861359-74864422	NC_000004.11	-	74861359
3093259	4.8e-07	1.68e-08	6.14596	9.12653	0.822515	NM_032509,NM_001102401,NM_025115,BC028230	chr8:33342650-33358774	NC_000008.10	+	33342650
2553970	4.82e-07	1.69e-08	6.14458	9.12043	1.11888	NM_033109,BC053660	chr2:55861218-55920958	NC_000002.11	-	55861218
2406253	4.84e-07	1.7e-08	6.14295	9.11324	1.26737		control		---	0
2500919	4.84e-07	1.7e-08	6.14301	9.11348	0.90135	NM_005415,BC019944	chr2:113401302-113421390	NC_000002.11	+	113401302
2436152	4.87e-07	1.71e-08	6.14172	9.1078	0.986302		control		---	0
2752725	4.92e-07	1.73e-08	6.13885	9.09511	0.944949	NM_018248,BC025954	chr4:178200354-178310925	NC_000004.11	+	178200354
2531712	4.96e-07	1.75e-08	6.13684	9.08627	0.919174	NM_002807,NM_001191037,NR_034059,BC094720	chr2:231921607-232037527	NC_000002.11	+	231921607
2702752	4.97e-07	1.75e-08	6.13622	9.08352	1.24997	NM_206963,NM_002888,BC029640	chr3:158414701-158466932	NC_000003.11	-	158414701
2406264	4.98e-07	1.76e-08	6.1354	9.07988	0.900226		control		---	0
2899095	5.09e-07	1.8e-08	6.13031	9.05744	1.09638	NM_003538,BC066248	chr6:26021925-26022268	NC_000006.11	+	26021925
3882720	5.14e-07	1.82e-08	6.12812	9.04777	0.815301	NM_016732,NM_007367,AK226085	chr20:32570294-32762626	NC_000020.10	+	32570294
2993657	5.18e-07	1.84e-08	6.12583	9.03764	1.27378		control		---	0
3254521	5.18e-07	1.84e-08	6.12562	9.03672	0.809516	NM_030927,NM_001128309,AF311903	chr10:82213942-82282921	NC_000010.10	+	82213942
3073013	5.21e-07	1.85e-08	6.12417	9.03033	0.802278	NM_001018111,NM_005397,BC042466	chr7:131185033-131327270	NC_000007.13	-	131185033
2491271	5.27e-07	1.87e-08	6.12143	9.01825	0.960627	NM_021103,BC107889	chr2:85105808-85134620	NC_000002.11	+	85105808
3427352	5.42e-07	1.93e-08	6.11503	8.99002	1.03755	NM_152905,NM_001135175,NM_001135176,NM_001135177,AK315821	chr12:97300892-97347467	NC_000012.11	+	97300892
3978453	5.44e-07	1.94e-08	6.11399	8.98546	0.818645	NM_001184819,NM_019067,BC011720,AK022657	chrX:54535825-54596474	NC_000023.10	+	54535825
4027416	5.46e-07	1.95e-08	6.11292	8.98073	0.849516	NM_000402,NM_001042351,X03674	chrX:153759616-153775767	NC_000023.10	-	153759616
2708817	5.59e-07	2e-08	6.10716	8.95536	0.758653	NM_080652,BX647928	chr3:185197971-185216821	NC_000003.11	-	185197971
2901417	5.6e-07	2.01e-08	6.10654	8.9526	0.865876	NM_033229,U34249,AK290280,AF220132,BC038585,AK291853,AF220133	chr6:30130993-30140774	NC_000006.11	+	30130993
2366156	5.63e-07	2.02e-08	6.10529	8.94712	1.03793	NM_199344,AL035297	chr1:168195161-168212411	NC_000001.10	+	168195161
2656569	5.69e-07	2.04e-08	6.10264	8.93545	0.863742	NM_016306,BC046500	chr3:186285202-186314637	NC_000003.11	+	186285202
2462511	5.77e-07	2.07e-08	6.09908	8.91976	0.853881	NM_018072,BC150614	chr1:236748325-236767795	NC_000001.10	-	236748325
2500838	5.86e-07	2.11e-08	6.09548	8.90391	0.918028	NM_019014,NM_001137604,BX647360	chr2:113299502-113340556	NC_000002.11	+	113299502
3474513	5.97e-07	2.15e-08	6.09075	8.8831	0.948477		control		---	0
3674840	5.97e-07	2.15e-08	6.0913	8.8855	0.938884	NM_016310,AF060223	chr16:96405-103625	NC_000016.9	-	96405
3010082	5.98e-07	2.16e-08	6.09006	8.88005	0.993757	NM_001127358,NM_001127357,NM_020432,NM_001127360,NM_001127359,AL831969	chr7:77428140-77690566	NC_000007.13	+	77428140
3420713	6.05e-07	2.19e-08	6.0875	8.8688	0.954489	NM_018448,AK292456	chr12:67659781-67708452	NC_000012.11	+	67659781
3569401	6.1e-07	2.21e-08	6.08525	8.85891	0.797939	NM_016026,AF167438	chr14:68143521-68162490	NC_000014.8	-	68143521
2540157	6.11e-07	2.22e-08	6.0845	8.8556	1.04329	NM_002539,NR_028374,BC025296,AK292352,M16650,AK301956,X53271,BC014562	chr2:10568023-10688889	NC_000002.11	-	10568023
3933625	6.14e-07	2.23e-08	6.08347	8.85107	1.13406	NM_080860,AK057315	chr21:43892597-43916464	NC_000021.8	-	43892597
3058944	6.15e-07	2.24e-08	6.08244	8.84654	1.37415	NM_000601,NM_001010932,NM_001010931,NM_001010933,NM_001010934,X16323	chr7:81328368-81399716	NC_000007.13	-	81328368
3538789	6.15e-07	2.24e-08	6.08247	8.84668	1.00957	NR_033344,NM_001172702,NM_153811,AF070578	chr14:61447880-61550430	NC_000014.8	+	61447880
4005644	6.16e-07	2.25e-08	6.08145	8.84216	0.886777	NM_004229,AF304448	chrX:40507558-40595101	NC_000023.10	-	40507558
2327482	6.16e-07	2.25e-08	6.08139	8.84191	0.831437	NR_030725,NR_030726,NM_001048194,NM_001048199,NM_001048195,NM_001269,NR_036473,NR_002909,BC069198,AK092726	chr1:28832475-28929906	NC_000001.10	+	28832475
3237548	6.18e-07	2.26e-08	6.08052	8.8381	0.912112	NM_178815,BC024163	chr10:18948296-19025191	NC_000010.10	+	18948296
2428405	6.21e-07	2.27e-08	6.07905	8.83164	0.848741	NM_175744,NM_001042679,NM_001042678,AK094474	chr1:113243759-113249748	NC_000001.10	-	113243759
2436149	6.22e-07	2.28e-08	6.07835	8.82857	0.87486		control		---	0
3181302	6.26e-07	2.3e-08	6.07675	8.82153	0.850423	NM_002486,NM_139246,D32002	chr9:100395535-100439749	NC_000009.11	+	100395535
3414561	6.26e-07	2.3e-08	6.07665	8.82109	0.712965	NM_173602,AK091597	chr12:50898768-51074055	NC_000012.11	+	50898768
2601414	6.31e-07	2.32e-08	6.07462	8.81214	1.25272	NM_006216,NM_001136528,NM_001136530,BC042628,AK131268	chr2:224833972-224906892	NC_000002.11	-	224833972
3957160	6.32e-07	2.32e-08	6.07401	8.80945	1.2381	NM_002309,BC069540	chr22:30633966-30647885	NC_000022.10	-	30633966
2406254	6.32e-07	2.33e-08	6.07369	8.80806	1.14639		control		---	0
2655168	6.38e-07	2.35e-08	6.07139	8.79794	0.792548	NM_018023,BC150273	chr3:183415606-183534905	NC_000003.11	+	183415606
3718902	6.48e-07	2.39e-08	6.06776	8.78199	1.96383	NM_002988,Y13710	chr17:34391640-34399377	NC_000017.10	+	34391640
3069366	6.5e-07	2.4e-08	6.06661	8.77695	0.958556	NM_003391,NR_024047,BC078170	chr7:116916705-116964916	NC_000007.13	-	116916705
2557956	6.5e-07	2.41e-08	-6.06627	8.77546	-3.13982	NM_182536,AY358664	chr2:69162965-69238424	NC_000002.11	-	69162965
3304624	6.55e-07	2.43e-08	6.06451	8.76772	0.916908	NM_012229,NM_001134373,BX648078	chr10:104846932-104953260	NC_000010.10	-	104846932
3256914	6.63e-07	2.46e-08	-6.06159	8.7549	-3.09827	NM_004190,AK301320	chr10:90406907-90438564	NC_000010.10	+	90406907
2562271	6.66e-07	2.47e-08	6.06032	8.74935	0.969417	NM_001747,AK130130	chr2:85621413-85653365	NC_000002.11	-	85621413
3892607	6.67e-07	2.48e-08	6.05972	8.7467	0.799472	NM_007002,NM_175573,AK054985	chr20:60872090-60883910	NC_000020.10	+	60872090
3471753	6.68e-07	2.49e-08	6.05883	8.74278	0.936926	NR_015404,BC015633	chr12:112277579-112280789	NC_000012.11	-	112277579
3042421	6.68e-07	2.49e-08	6.05885	8.74289	0.836189	NM_031243,NM_002137,BX537494	chr7:26229288-26241714	NC_000007.13	-	26229288
3886050	6.7e-07	2.5e-08	6.05768	8.73775	0.838867	NR_034009,NM_006275,AK300411	chr20:42086518-42092887	NC_000020.10	+	42086518
3905073	6.78e-07	2.54e-08	6.05488	8.72546	0.789352	NM_014657,BC013755	chr20:36611426-36661854	NC_000020.10	-	36611426
3764872	6.79e-07	2.54e-08	6.05441	8.72339	0.993568	NM_016077,BX647177	chr17:57752017-57785928	NC_000017.10	-	57752017
3987996	6.87e-07	2.58e-08	6.05133	8.70988	1.09	NM_005032,NM_001136025,NM_001172335,BC039049	chrX:114795473-114930531	NC_000023.10	+	114795473
3340161	6.88e-07	2.58e-08	6.05101	8.70848	0.823595	NM_016147,AK225647	chr11:73881983-73975686	NC_000011.9	+	73881983
3142485	6.94e-07	2.61e-08	6.04849	8.69742	1.10962	NM_001144878,NM_005536,NM_001144879,NM_001010893,AK300750,BC136625	chr8:82569712-82607207	NC_000008.10	-	82569712
3996430	6.94e-07	2.61e-08	6.04883	8.69888	0.739962	NM_004699,AD001530	chrX:153672504-153678957	NC_000023.10	+	153672504
3175274	6.96e-07	2.62e-08	6.04763	8.69364	1.09809	NM_001190482,NM_006200,BC012064	chr9:78505596-78974803	NC_000009.11	+	78505596
2925590	6.97e-07	2.63e-08	6.04693	8.69056	1.02379	NM_052913,AB067500	chr6:130686738-130764569	NC_000006.11	+	130686738
3196691	6.97e-07	2.63e-08	6.04652	8.68878	0.809853	NM_014878,AK292169	chr9:2720489-2877679	NC_000009.11	-	2720489
3663228	6.98e-07	2.64e-08	6.04607	8.68682	0.833141	NM_001126129,NM_022770,NM_001126130,AK127454	chr16:58370533-58492748	NC_000016.9	+	58370533
3388785	7.01e-07	2.65e-08	6.04476	8.68105	1.12314	NM_002425,BC002591	chr11:102638270-102651351	NC_000011.9	-	102638270
2406252	7.05e-07	2.68e-08	6.04294	8.67305	1.09553		control		---	0
2503618	7.05e-07	2.67e-08	6.04311	8.67382	0.894895	NM_004622,AK091915	chr2:122513029-122525419	NC_000002.11	+	122513029
2436141	7.1e-07	2.7e-08	6.04137	8.6662	1.39981		control		---	0
3327057	7.2e-07	2.74e-08	6.03799	8.65137	0.835756	NM_024841,NM_001160167,NM_001160169,NM_001160168,BC008922	chr11:36317848-36486753	NC_000011.9	+	36317848
2706985	7.31e-07	2.79e-08	6.03392	8.63354	0.993083	NM_020409,NM_177988,BC032522	chr3:179301073-179322739	NC_000003.11	-	179301073
3375545	7.31e-07	2.78e-08	6.03432	8.63526	0.916749	NM_013402,AF084558	chr11:61568102-61584453	NC_000011.9	-	61568102
3375245	7.46e-07	2.85e-08	6.02942	8.61382	0.804016	NM_001923,U32986	chr11:61066937-61100977	NC_000011.9	-	61066937
2900091	7.49e-07	2.86e-08	6.02805	8.60783	1.25914	NM_003511,BC112072	chr6:27831153-27833635	NC_000006.11	+	27831153
3489020	7.49e-07	2.87e-08	6.02755	8.60562	1.04472	NM_000321,L41870	chr13:48844937-49173677	NC_000013.10	+	48844937
2323559	7.49e-07	2.87e-08	6.0275	8.60541	1.01273	NM_016183,AF173378	chr1:19578053-19586601	NC_000001.10	+	19578053
3603408	7.52e-07	2.89e-08	6.02633	8.60028	1.12831	NM_002789,NM_001102667,NM_001102668,AK055714	chr15:78831660-78841584	NC_000015.9	+	78831660
4026560	7.55e-07	2.9e-08	6.02511	8.59493	1.37605	NM_152274,NM_001130997,BC007232	chrX:152847035-152868870	NC_000023.10	-	152847035
3608298	7.55e-07	2.9e-08	6.0253	8.59578	1.02366	NM_000057,U39817	chr15:91193007-91368222	NC_000015.9	+	91193007
3470281	7.84e-07	3.02e-08	6.01644	8.55699	1.11537		control		---	0
2437205	8e-07	3.08e-08	6.01166	8.53609	0.718948	NR_002188,AK295259,AK090514	chr1:155182834-155197290	NC_000001.10	-	155182834
3725481	8.04e-07	3.1e-08	6.01042	8.53064	0.738042	NM_023079,BC015890	chr17:46985809-47006871	NC_000017.10	+	46985809
3303339	8.13e-07	3.14e-08	6.00772	8.51881	0.812757	NM_018294,NR_002954,BC008746	chr10:101992057-102027756	NC_000010.10	-	101992057
3009959	8.24e-07	3.18e-08	6.00446	8.50458	0.980075	NM_002835,NM_001131008,NM_001131009,BC050008	chr7:77166425-77285138	NC_000007.13	+	77166425
2953501	8.29e-07	3.21e-08	6.0028	8.49733	1.06397	NM_018965,AF213457,BC032362,AB062787	chr6:41126258-41130966	NC_000006.11	-	41126258
3751830	8.35e-07	3.24e-08	6.00084	8.48873	0.827922	NM_000386,BC003616	chr17:28575230-28619078	NC_000017.10	-	28575230
2949051	8.51e-07	3.3e-08	5.99644	8.46952	0.959701		control		---	0
2950167	8.53e-07	3.31e-08	5.99565	8.46607	0.729508	NM_000544,NM_018833,AK292963,Z22936,M74447,BT009906,AF105151,Z22935,AB073779,AF078671,AK299603,AK225657	chr6:32789610-32806537	NC_000006.11	-	32789610
2655773	8.54e-07	3.32e-08	5.99505	8.46344	0.941705	NM_006232,U37689	chr3:184079578-184086324	NC_000003.11	+	184079578
2367154	8.54e-07	3.32e-08	5.99503	8.46336	0.778475	NM_015172,AF488829,AK304841,BC045713,AB029019,AK298887,AK095231,AK124374	chr1:171449454-171562639	NC_000001.10	+	171449454
3341061	8.64e-07	3.37e-08	5.99166	8.44864	0.869936	NM_018367,BC049837	chr11:76550022-76737834	NC_000011.9	+	76550022
3244488	8.64e-07	3.37e-08	5.99191	8.44973	0.864477	NM_032023,AY216715	chr10:45455219-45492636	NC_000010.10	+	45455219
3101629	8.64e-07	3.38e-08	-5.99148	8.44786	-1.084	NM_144650,BC064634,AY033237,AK300243,AK293530,AK300881,AK294114	chr8:67344752-67381312	NC_000008.10	+	67344752
2487082	8.74e-07	3.42e-08	5.9888	8.43615	0.971383	NM_032208,NM_053034,NM_018153,AF279145	chr2:69240322-69525373	NC_000002.11	+	69240322
2330773	8.74e-07	3.43e-08	5.9882	8.43354	0.940755	NM_018101,BC001651	chr1:38158110-38175380	NC_000001.10	+	38158110
2474681	8.74e-07	3.43e-08	5.98787	8.43208	0.931788	NM_007266,NR_026735,NM_001145047,NM_001145048,NM_001145049,AK298866	chr2:27851855-27874378	NC_000002.11	+	27851855
3419641	8.74e-07	3.43e-08	5.98814	8.43325	0.884911	NM_020762,BC053903	chr12:64238094-64537564	NC_000012.11	+	64238094
3474977	8.75e-07	3.44e-08	5.98726	8.42944	1.27688		control		---	0
2953852	8.75e-07	3.44e-08	5.98752	8.43055	0.83912	NM_004275,AK097385	chr6:41872874-41889070	NC_000006.11	-	41872874
3432467	8.82e-07	3.48e-08	5.985	8.41954	0.910833	NM_006187,AB044545	chr12:113376167-113411280	NC_000012.11	+	113376167
2346023	8.82e-07	3.48e-08	5.98469	8.41821	0.904691	NM_001134479,NM_018103,BC024159	chr1:90286435-90401997	NC_000001.10	+	90286435
3474939	8.82e-07	3.47e-08	5.98522	8.4205	0.891567		control		---	0
3457667	8.87e-07	3.51e-08	5.98304	8.411	0.78228	NM_014255,NM_001190991,NM_001127460,NM_001166279,NM_014871,AY359102	chr12:56702956-56710120	NC_000012.11	-	56702956
4000370	8.92e-07	3.53e-08	5.98171	8.4052	0.907637	NM_001018113,NM_152633,BC136558,NM_002520,NM_199185	chrX:14807727-14891191	NC_000023.10	-	14807727
3853108	8.94e-07	3.54e-08	5.98093	8.40179	0.783417	NM_000435,U97669	chr19:15263493-15311792	NC_000019.9	-	15263493
3418007	8.95e-07	3.55e-08	5.98035	8.39925	0.91293	NM_005412,NM_001166356,NM_001166357,NM_001166358,NR_029417,NM_001166359,NR_029415,NR_029416,AK055053	chr12:57623319-57628714	NC_000012.11	+	57623319
3974708	8.96e-07	3.56e-08	5.97979	8.39681	0.912541	NM_001039590,NM_001039591,NM_004654,AF000986,BC054861	chrX:40944598-41095832	NC_000023.10	+	40944598
2448971	9.01e-07	3.58e-08	5.97848	8.39111	0.914616	NM_015984,AK225794	chr1:192821840-193029190	NC_000001.10	-	192821840
3256590	9.19e-07	3.66e-08	5.97382	8.37075	0.864695	NM_004670,NM_001015880,AF074331,BC009894,AF173365,AF091242,AF313907,AK301453,AF150754,CR602681	chr10:89380566-89507460	NC_000010.10	+	89380566
3838809	9.24e-07	3.68e-08	5.97242	8.36468	0.682948	NR_033397,NM_001536,NM_198318,NM_001101340,AK304660,D66904,AK295973,BC109282,BC109283,AY775289,CR407608,AF085918,AK301038,BC032764	chr19:50179174-50193832	NC_000019.9	+	50179174
3476012	9.3e-07	3.71e-08	5.97073	8.35727	0.966838	NM_022782,AK096541	chr12:123636873-123721395	NC_000012.11	-	123636873
3301218	9.33e-07	3.73e-08	5.96966	8.35261	0.841615	NM_020992,BC000915	chr10:96991493-97050813	NC_000010.10	-	96991493
2941476	9.36e-07	3.74e-08	5.96862	8.34807	0.902264	NM_003220,NM_001042425,NM_001032280,BC017754	chr6:10385756-10420095	NC_000006.11	-	10385756
3888217	9.36e-07	3.75e-08	5.96836	8.34697	0.805556	NM_017895,AL832131	chr20:47804373-47860606	NC_000020.10	+	47804373
3416488	9.4e-07	3.77e-08	5.96723	8.34202	1.06707		control		---	0
3323443	9.41e-07	3.78e-08	5.96628	8.3379	0.925357	NM_005788,NM_001145167,NM_001145166,BC064831	chr11:20409011-20530813	NC_000011.9	+	20409011
3754469	9.41e-07	3.78e-08	5.96655	8.33907	0.910214	NM_198839,NM_198834,NM_198838,NM_198836,NM_198837,AB371587,BC137287,AY237919,AY315627,U19822,AK295735,AK301579,AK295805,AK296368,AK295586,AY315626,AY315622,AY315621,AY315624,AK308905	chr17:35423138-35766902	NC_000017.10	-	35423138
3191695	9.41e-07	3.78e-08	5.96656	8.33911	0.836135	NM_014285,AK090512	chr9:133569179-133582976	NC_000009.11	+	133569179
3007894	9.46e-07	3.81e-08	5.96484	8.33163	0.740622	NM_017528,AF412034,BC011696,AF420248,BC001780,BC000169,AK291116,AK296375,AJ224442,AK091162,AK126224,CR602260,CR603690,AK309574	chr7:73097898-73119498	NC_000007.13	+	73097898
2444283	9.49e-07	3.82e-08	5.96395	8.32773	1.00794	NM_003326,BC041663,NR_033756,AK130460	chr1:173152873-173458518	NC_000001.10	-	173152873
3548152	9.54e-07	3.85e-08	5.96211	8.3197	0.824045	NM_018319,NM_001008744,AK093235	chr14:90421293-90511103	NC_000014.8	+	90421293
2320581	9.54e-07	3.85e-08	5.9621	8.31965	0.78765	NM_000302,AK299150,BC016657,AK316285,AK294688,AK295254,L06419,AK124035	chr1:11994287-12035587	NC_000001.10	+	11994287
3412008	9.59e-07	3.88e-08	5.96076	8.31382	0.911192	NM_016488,NM_001143787,NM_201515,NM_201439,NM_201440,NM_001143788,NM_001143789,NM_201438,AY039238	chr12:42631690-42842410	NC_000012.11	+	42631690
3761538	9.71e-07	3.93e-08	5.95757	8.29995	1.4633	NM_006361,AY937237	chr17:46802872-46806150	NC_000017.10	-	46802872
2320059	9.71e-07	3.93e-08	5.95757	8.29991	1.21538		control		---	0
2893721	9.73e-07	3.95e-08	5.95683	8.29668	0.926185	NM_031480,NM_153005,BC006104	chr6:7390036-7464232	NC_000006.11	+	7390036
2320066	9.75e-07	3.97e-08	5.95582	8.29232	0.98331		control		---	0
3646542	9.75e-07	3.97e-08	5.95583	8.29236	0.81376	NM_019109,NM_201400,NM_201598,AB019038,BC010084	chr16:5083713-5136694	NC_000016.9	+	5083713
3541137	9.78e-07	3.98e-08	5.95484	8.28803	0.9216	NM_004094,BC002513	chr14:67826765-67853230	NC_000014.8	+	67826765
3455134	9.86e-07	4.02e-08	5.95297	8.27991	0.901118	NM_182507,NM_001081492,BC065180	chr12:52517128-52585790	NC_000012.11	-	52517128
3377895	9.91e-07	4.05e-08	5.95126	8.27247	0.908836		control		---	0
3372253	9.91e-07	4.05e-08	5.9514	8.27304	0.735025	NM_001172639,NM_001172640,NM_006560,NM_198700,NM_001025596,AF248648	chr11:47487492-47587037	NC_000011.9	-	47487492
2889916	9.96e-07	4.07e-08	5.94981	8.26613	0.764991	NM_014244,NM_021599	chr5:178540868-178784868	NC_000005.9	-	178540868
3630668	1.01e-06	4.13e-08	5.94673	8.2527	1.17259	NM_033429,NM_001031733,AK296804	chr15:68479898-68499089	NC_000015.9	-	68479898
3378210	1.01e-06	4.14e-08	5.94637	8.25116	0.711192	NM_015399,NM_001024957,BC009834	chr11:66104817-66112708	NC_000011.9	-	66104817
3413787	1.02e-06	4.22e-08	5.94209	8.23254	0.974168	NM_032704,BC004949,AF081484	chr12:49521581-49667074	NC_000012.11	+	49521581
3878429	1.02e-06	4.21e-08	5.94261	8.23479	0.846123	NM_006466,NM_006606,BC016761	chr20:18447777-18468173	NC_000020.10	+	18447777
3837132	1.02e-06	4.18e-08	5.9439	8.24039	0.759116	NR_027280,NM_005500,NM_001145714,NM_001145713,AK027595	chr19:47616551-47713887	NC_000019.9	+	47616551
2903588	1.02e-06	4.21e-08	5.94256	8.23458	0.731024	NM_001185181,NM_014260,BC059783,CR609151	chr6:33257099-33265287	NC_000006.11	+	33257099
2548402	1.03e-06	4.25e-08	5.94023	8.22445	1.071	NM_002759,NM_001135651,NM_001135652,AK290655	chr2:37326361-37384180	NC_000002.11	-	37326361
3098935	1.03e-06	4.26e-08	5.93972	8.22221	0.898731	NM_024831,AF286340	chr8:56685685-56740927	NC_000008.10	+	56685685
3325503	1.04e-06	4.31e-08	5.93704	8.21055	1.81309	NM_002901,BC010120,AK127569	chr11:32112369-32127252	NC_000011.9	+	32112369
2409004	1.07e-06	4.42e-08	5.93157	8.18677	0.775041	NM_022356,NM_001146289,AK027648	chr1:43211355-43232728	NC_000001.10	-	43211355
3722152	1.07e-06	4.4e-08	5.93251	8.19087	0.66596	NM_176863,NM_005789,U11292	chr17:40976453-40995769	NC_000017.10	+	40976453
3945314	1.1e-06	4.56e-08	5.92454	8.1562	1.04447	NM_006855,NM_016657,BC001277	chr22:38864074-38888103	NC_000022.10	+	38864074
3629761	1.1e-06	4.56e-08	5.92472	8.15701	0.868858	AK296134,NM_030800	chr15:65870708-65903569	NC_000015.9	-	65870708
2987441	1.1e-06	4.58e-08	5.92396	8.1537	0.789639	NM_001037283,NM_003751,U78525	chr7:2349403-2420370	NC_000007.13	+	2349403
3815143	1.12e-06	4.66e-08	5.91987	8.13593	1.09241	BC052236,BC042125	chr19:751136-764314	NC_000019.9	+	751136
2731381	1.13e-06	4.72e-08	5.91715	8.12411	1.43761	NM_001511,NM_002089,BC011976	chr4:74735109-74765090	NC_000004.11	+	74735109
3634509	1.13e-06	4.73e-08	5.91637	8.12071	1.02549	NM_006383,BC047381	chr15:78396968-78424048	NC_000015.9	-	78396968
3257098	1.13e-06	4.7e-08	5.9181	8.12822	1.00109	NM_000043,NM_152872,NM_152871,NR_028036,NR_028033,NR_028035,NR_028034,BC012479	chr10:90731539-90775541	NC_000010.10	+	90731539
2530599	1.13e-06	4.73e-08	5.91635	8.12063	0.830239	NM_001135187,NM_004504,NM_001135188,NM_001135189,BC030592	chr2:228336878-228425923	NC_000002.11	+	228336878
3771800	1.13e-06	4.71e-08	5.9174	8.12519	0.749481	NM_003016,NR_036608,NM_001195427,NR_030366,BC070086	chr17:74730217-74733987	NC_000017.10	-	74730217
3722917	1.14e-06	4.78e-08	5.91414	8.11103	0.94437	NM_002087,AF055008	chr17:42422501-42431077	NC_000017.10	+	42422501
2949039	1.14e-06	4.76e-08	5.91509	8.11518	0.814018		control		---	0
3233322	1.15e-06	4.83e-08	5.91185	8.10108	1.02967	NM_017782,AK095469	chr10:5726845-5806623	NC_000010.10	+	5726845
3520989	1.15e-06	4.83e-08	5.91191	8.10136	0.928161	NM_014305,BC033675	chr13:95205179-95254370	NC_000013.10	-	95205179
2847292	1.15e-06	4.81e-08	5.91282	8.10532	0.847244	NM_017755,NM_001193455,AB255451	chr5:6457364-6633394	NC_000005.9	-	6457364
3434525	1.15e-06	4.83e-08	5.91174	8.10063	0.839294	NM_014730,BC016297	chr12:121124615-121139659	NC_000012.11	+	121124615
3490892	1.16e-06	4.9e-08	5.90889	8.08823	2.64602	NM_006418,AY358567	chr13:53584428-53708870	NC_000013.10	+	53584428
3980916	1.16e-06	4.88e-08	5.90967	8.09162	1.19293		control		---	0
3289189	1.18e-06	4.98e-08	-5.9052	8.07223	-1.50565	NM_019893,NM_001143974,NM_001079516,AF449759	chr10:51910562-52012883	NC_000010.10	-	51910562
3474937	1.19e-06	5.05e-08	5.90194	8.0581	1.0691		control		---	0
2651989	1.19e-06	5.03e-08	5.90282	8.06191	1.06857	NM_005414,NM_001145098,NM_001145097,BC059386	chr3:170075513-170111436	NC_000003.11	+	170075513
2742985	1.19e-06	5.03e-08	5.90272	8.06146	0.958076	NM_014264,NM_001190799,NM_001190801,BC036023	chr4:128802000-128820359	NC_000004.11	+	128802000
2444451	1.19e-06	5.02e-08	5.90321	8.06362	0.851342	NM_001127181,NM_033319,NM_001171182,NR_002578,NR_002746,NR_003942,NR_003944,NR_003940,NR_002750,NR_003941,NR_002579,BC038733,AK055606	chr1:173768690-173837999	NC_000001.10	-	173768690
2690900	1.19e-06	5.06e-08	5.90174	8.05725	0.849215	NM_005191,BC042665	chr3:119242769-119299373	NC_000003.11	-	119242769
3257559	1.2e-06	5.09e-08	5.90036	8.05125	0.732643	NM_001104546,NM_006413,BC006991	chr10:92631474-92668310	NC_000010.10	+	92631474
3284188	1.21e-06	5.13e-08	5.89848	8.0431	0.948837	NM_002211,NM_033668,NM_133376,BC020057,AK291697,BX537407,U28252,M34189	chr10:33171045-33281361	NC_000010.10	-	33171045
2409220	1.21e-06	5.16e-08	5.89712	8.0372	0.864753	NM_001159936,NM_006824,U86602,AK096139	chr1:43629853-43736478	NC_000001.10	-	43629853
3212312	1.22e-06	5.19e-08	5.89569	8.03101	0.924182		control		---	0
2713074	1.22e-06	5.22e-08	5.89454	8.02603	0.780295	NM_007362,NM_001042540,BX537372	chr3:196662280-196670366	NC_000003.11	-	196662280
3997946	1.23e-06	5.25e-08	5.89333	8.02075	1.17246	NM_005044,BC041073,BC074851	chrX:3522417-3996081	NC_000023.10	-	3522417
2993658	1.29e-06	5.55e-08	5.88099	7.9673	1.2233		control		---	0
2818454	1.29e-06	5.54e-08	5.88117	7.96807	1.04017	NM_022550,NM_003401,NM_022406,BC016314	chr5:82373317-82684169	NC_000005.9	+	82373317
2427074	1.29e-06	5.51e-08	5.88261	7.97432	0.964259	NM_002790,BC103751	chr1:109941050-109969088	NC_000001.10	-	109941050
3377423	1.29e-06	5.55e-08	5.88105	7.96755	0.893604	NM_080668,BC011000	chr11:64835499-64851673	NC_000011.9	-	64835499
3804195	1.29e-06	5.54e-08	5.88129	7.96859	0.841779	NM_012319,NM_001099406,AK304079	chr18:33671883-33711414	NC_000018.9	-	33671883
3268274	1.32e-06	5.69e-08	5.8754	7.94312	0.865475	NM_001195608,NM_001001974,NM_021622,BC042458,BC001136,AF286160,AB209407,AK095775,CR595156,BX647627	chr10:124134148-124191852	NC_000010.10	+	124134148
3326183	1.32e-06	5.68e-08	5.87554	7.94371	0.799907	NM_005898,NM_203364,BC001731	chr11:34053135-34125370	NC_000011.9	+	34053135
3886639	1.33e-06	5.75e-08	5.87297	7.9326	0.945736	NM_003404,NM_139323,AB209759	chr20:43493861-43537334	NC_000020.10	+	43493861
3720228	1.33e-06	5.74e-08	5.87335	7.93425	0.838661	NM_016507,NM_015083,BC150265	chr17:37618024-37690991	NC_000017.10	+	37618024
2770039	1.34e-06	5.8e-08	5.87119	7.9249	0.981167	NM_006681,BC012908	chr4:56461398-56502443	NC_000004.11	-	56461398
3619116	1.34e-06	5.79e-08	5.87132	7.92546	0.884842	NM_007223,BC067106	chr15:40091223-40213093	NC_000015.9	-	40091223
3833926	1.35e-06	5.83e-08	5.86975	7.91865	1.33715	NM_000767,M29874,DQ198366	chr19:41497211-41524280	NC_000019.9	+	41497211
3751463	1.35e-06	5.84e-08	5.86967	7.91833	0.934724	NM_020772,AY232289	chr17:27582866-27621500	NC_000017.10	-	27582866
3893760	1.35e-06	5.85e-08	5.86904	7.91557	0.697328	NM_199360,NM_199362,NM_199361,NM_199363,NM_003288,NM_199359,AF004430	chr20:62496590-62541233	NC_000020.10	+	62496590
3883382	1.36e-06	5.9e-08	5.86727	7.90791	0.912628	NM_198398,NM_015966,EF206690	chr20:34129796-34145405	NC_000020.10	+	34129796
3089215	1.38e-06	5.97e-08	5.86441	7.89557	0.801158	NR_033403,NM_006129,NR_033404,NM_001199,AB209590	chr8:22022451-22069836	NC_000008.10	+	22022451
2446567	1.38e-06	6e-08	5.86343	7.89133	0.77726	NM_005819,NM_020950,BC009944,AK055739	chr1:180829035-180992033	NC_000001.10	-	180829035
3655665	1.38e-06	6.02e-08	5.86272	7.88825	0.6716	NM_001042539,NM_002383,AB209061	chr16:29817455-29822476	NC_000016.9	+	29817455
3555897	1.39e-06	6.05e-08	5.86157	7.8833	0.962837		control		---	0
3907111	1.39e-06	6.08e-08	5.86061	7.87911	0.868243	NM_006809,BC007423	chr20:43570771-43589114	NC_000020.10	-	43570771
3645565	1.39e-06	6.05e-08	5.86143	7.88269	0.773582	NM_024339,NM_001142350,NM_017885,NM_001002017,BC050674	chr16:3074040-3077745	NC_000016.9	+	3074040
3401259	1.39e-06	6.07e-08	5.86076	7.87976	0.75824	NM_003213,NM_201443,NM_201441,BC015497	chr12:3068210-3155179	NC_000012.11	+	3068210
3845909	1.39e-06	6.04e-08	5.8618	7.88429	0.689566	NM_032737,BC006551	chr19:2428179-2456958	NC_000019.9	-	2428179
3498502	1.4e-06	6.11e-08	5.85928	7.87336	0.980032	NM_004800,BC110656	chr13:100110892-100216257	NC_000013.10	+	100110892
3358950	1.4e-06	6.13e-08	5.85851	7.87004	0.878253	NM_001909,M11233,NM_001170820,BC036199	chr11:1756041-1785783	NC_000011.9	-	1756041
3819577	1.42e-06	6.25e-08	5.85423	7.85155	0.82619		control		---	0
2587961	1.43e-06	6.29e-08	5.85294	7.84596	1.06913	NM_001822,NM_001025201,BC011393	chr2:175637470-175870172	NC_000002.11	-	175637470
2806091	1.45e-06	6.38e-08	5.8498	7.83243	0.934143	NM_001145525,NM_001145521,NM_015577,NM_001145520,NM_001145522,NM_001145523,AY317139,AF155135,BC052988,AY354204	chr5:34656447-34838286	NC_000005.9	+	34656447
3977299	1.45e-06	6.4e-08	5.84901	7.82901	0.918772	NM_001127899,NM_001127898,NM_000084,NR_029708,X91906	chrX:49687235-49954115	NC_000023.10	+	49687235
3445908	1.47e-06	6.5e-08	5.8455	7.81384	0.97786	NM_004447,BC030010	chr12:15773100-15942322	NC_000012.11	-	15773100
3699757	1.47e-06	6.46e-08	5.84679	7.81943	0.770256	NM_001130089,NM_005548,AF285758,AK298535	chr16:75661392-75682534	NC_000016.9	-	75661392
2858023	1.48e-06	6.53e-08	5.8445	7.80953	0.947202	NM_006622,AF059617	chr5:57749815-57756867	NC_000005.9	-	57749815
2565274	1.49e-06	6.59e-08	5.84233	7.80014	1.03932		control		---	0
3344990	1.49e-06	6.61e-08	5.84183	7.79798	0.874088	NM_015368,AF093239	chr11:93862020-93918757	NC_000011.9	+	93862020
2358906	1.49e-06	6.61e-08	5.84171	7.79749	0.871662	NM_002796,S71381	chr1:151372030-151374403	NC_000001.10	+	151372030
3228884	1.49e-06	6.65e-08	5.84051	7.79229	0.778699	NM_001134398,NM_003371,BC132965,BC132967,AJ420448,AF258564,AK123314,AK091622,AK130475	chr9:136627020-136857400	NC_000009.11	-	136627020
3351841	1.49e-06	6.58e-08	5.84293	7.80276	0.755971	NM_000190,NM_001024382,BX647328	chr11:118955593-118965479	NC_000011.9	+	118955593
3959451	1.49e-06	6.58e-08	5.84279	7.80217	0.754991	NM_002473,AB191263,AB290175,CR456526,AL832639,AK304840,BC090921,AF085963,AK025393,BC131741	chr22:36677332-36784036	NC_000022.10	-	36677332
3315549	1.49e-06	6.59e-08	5.84242	7.80056	0.732445	NM_002817,NM_175932,BC001100	chr11:236977-252966	NC_000011.9	+	236977
2328494	1.51e-06	6.71e-08	5.83848	7.78355	1.20224		control		---	0
3671202	1.51e-06	6.73e-08	5.83766	7.78001	0.983405	NM_001257,BC030653	chr16:82660578-83834666	NC_000016.9	+	82660578
3425134	1.51e-06	6.72e-08	5.83803	7.78158	0.96143	NM_181783,BX538169	chr12:88536101-88593655	NC_000012.11	+	88536101
2458773	1.51e-06	6.75e-08	5.83718	7.77795	0.800284	NM_001618,J03473	chr1:226498490-226595796	NC_000001.10	-	226498490
3958399	1.52e-06	6.83e-08	5.8346	7.76679	0.92387		control		---	0
2949042	1.52e-06	6.8e-08	5.83544	7.77044	0.841279		control		---	0
2902178	1.52e-06	6.79e-08	5.83588	7.77234	0.739505	NM_007109,NM_001077511,BC044632,BC033086,BC002493,BT007247,AK056834	chr6:31126125-31134916	NC_000006.11	+	31126125
3259253	1.53e-06	6.85e-08	5.83388	7.7637	1.11376	NM_001776,NM_001164178,NM_001098175,NM_001164179,NM_001164182,NM_001164181,NM_001164183,AK301459,AK294399	chr10:97453972-97698685	NC_000010.10	+	97453972
2977510	1.53e-06	6.86e-08	5.83339	7.76159	0.789408	NM_032020,AY358551	chr6:143811349-143858333	NC_000006.11	-	143811349
3090922	1.54e-06	6.92e-08	5.83166	7.7541	0.833204	NM_002717,NM_001177591,BC041071	chr8:26100943-26230344	NC_000008.10	+	26100943
3375049	1.56e-06	7.02e-08	5.82845	7.74027	0.819779	NM_014502,BC018665	chr11:60658022-60674056	NC_000011.9	-	60658022
2363562	1.58e-06	7.12e-08	5.82497	7.7253	1.13833	NM_004106,M33195	chr1:161185044-161190478	NC_000001.10	+	161185044
3819569	1.59e-06	7.17e-08	5.82352	7.71901	1.073		control		---	0
2788195	1.62e-06	7.32e-08	5.81897	7.69944	0.762925	NM_001102653,NM_017493,AK302581,BC118653,BC118572,X68242,AB028969	chr4:146054720-146252492	NC_000004.11	-	146054720
3426828	1.68e-06	7.61e-08	5.81028	7.66201	0.887874	NM_017599,NR_029895,BC028597	chr12:95611544-95702274	NC_000012.11	+	95611544
2773947	1.71e-06	7.74e-08	5.80634	7.64501	1.3275	NM_002416,BC042178	chr4:76922495-76932274	NC_000004.11	-	76922495
3430552	1.71e-06	7.74e-08	5.80632	7.64496	0.868313	NM_007062,L07758	chr12:108079556-108124187	NC_000012.11	+	108079556
2351763	1.71e-06	7.72e-08	-5.80692	7.64752	-2.37387	NM_201653,NM_021797,AF290004	chr1:111833484-111866699	NC_000001.10	+	111833484
2796510	1.72e-06	7.81e-08	5.80428	7.63618	0.830097	NM_024629,AF516710	chr4:185615243-185667199	NC_000004.11	-	185615243
3986514	1.73e-06	7.83e-08	5.80368	7.63357	1.01948	NM_002764,NM_175886,D00860,BC062797	chrX:106871678-106903248	NC_000023.10	+	106871678
3275151	1.74e-06	7.92e-08	5.80122	7.62299	0.714689		control		---	0
3988538	1.76e-06	8e-08	5.79899	7.61343	0.95	NM_001560,Y10659	chrX:117855148-117939505	NC_000023.10	+	117855148
2584018	1.77e-06	8.04e-08	5.79775	7.60809	1.25837	NM_001935,BC065265	chr2:162838228-162931042	NC_000002.11	-	162838228
3555906	1.77e-06	8.07e-08	5.79711	7.60534	0.787082		control		---	0
2451309	1.77e-06	8.07e-08	5.79694	7.6046	0.760771	NM_006618,BT007098,AJ243706	chr1:202696488-202781948	NC_000001.10	-	202696488
2806231	1.77e-06	8.1e-08	5.79619	7.60136	0.703629	NM_018321,BC037857,AK001962	chr5:34915491-34927088	NC_000005.9	+	34915491
2949067	1.79e-06	8.2e-08	5.79342	7.58947	0.779136		control		---	0
2992814	1.83e-06	8.35e-08	5.78934	7.57191	1.21508	NM_001005340,NM_002510,BC032783	chr7:23286326-23333832	NC_000007.13	+	23286326
2401275	1.83e-06	8.4e-08	5.78803	7.56631	0.813264	NM_001102398,NM_005826,NM_001102399,NM_001102397,BC001449	chr1:23613958-23671339	NC_000001.10	-	23613958
2697331	1.84e-06	8.41e-08	5.78759	7.56438	0.745312	NM_016216,BC009472	chr3:137879421-137893771	NC_000003.11	-	137879421
2421121	1.85e-06	8.52e-08	5.78481	7.55247	0.981783	NM_001184765,NM_001184766,NM_020729,NM_001007022,AK302792,BC091490,AK303209,BC047368,BC009779,AB033055,BC026105,CR591511	chr1:86720533-86872528	NC_000001.10	-	86720533
3235414	1.85e-06	8.52e-08	5.78469	7.55194	0.845857	NM_018144,NM_001142628,NR_024577,NR_024576,NM_001142627,AF346603	chr10:12171664-12212295	NC_000010.10	+	12171664
3962219	1.85e-06	8.52e-08	5.78486	7.55266	0.834058	NM_000262,M62783	chr22:42422833-42466846	NC_000022.10	-	42422833
2908487	1.86e-06	8.58e-08	5.78327	7.54586	1.33413		control		---	0
3474521	1.87e-06	8.63e-08	5.7818	7.53952	1.23875		control		---	0
3277468	1.88e-06	8.67e-08	5.78075	7.535	0.881059	NM_014688,NM_001080491,BC042943	chr10:11483194-11685913	NC_000010.10	-	11483194
2443120	1.88e-06	8.7e-08	-5.78018	7.53256	-1.57784	NM_001937,BC033736	chr1:168560754-168698492	NC_000001.10	-	168560754
2458289	1.9e-06	8.78e-08	5.77807	7.5235	1.01902	NM_002296,NM_194442,BC020079	chr1:225589217-225616607	NC_000001.10	-	225589217
3212306	1.9e-06	8.76e-08	5.77841	7.52498	0.961148		control		---	0
3119339	1.91e-06	8.86e-08	5.7759	7.51421	0.9655	NM_002346,NM_001127213,U42376	chr8:144077327-144103963	NC_000008.10	+	144077327
3854892	1.92e-06	8.91e-08	5.77467	7.50893	0.789256	NM_012321,AF117235,NM_001000	chr19:18396139-18433981	NC_000019.9	-	18396139
3333417	1.92e-06	8.9e-08	-5.77499	7.51028	-1.0448	NM_002407,AF071219	chr11:61976140-61981612	NC_000011.9	+	61976140
3882069	1.94e-06	9e-08	5.7724	7.49918	0.787087	NM_012325,BC106068	chr20:31407643-31438203	NC_000020.10	+	31407643
2408189	1.95e-06	9.08e-08	5.77044	7.49077	0.922093	NM_000310,NM_001142604,BC008426	chr1:40537328-40563355	NC_000001.10	-	40537328
3521083	1.95e-06	9.09e-08	-5.77012	7.48938	-1.056	NM_007084	chr13:95361880-95365881	NC_000013.10	-	95361880
2480961	1.96e-06	9.14e-08	5.769	7.48456	1.41391	NM_002354,M32325	chr2:47572317-47614151	NC_000002.11	+	47572317
3980889	1.97e-06	9.2e-08	5.76739	7.47766	0.935758		control		---	0
2406420	1.98e-06	9.26e-08	5.76613	7.47229	0.885423	NM_022111,NM_001190481,AF297866	chr1:36185449-36235607	NC_000001.10	-	36185449
3488022	1.98e-06	9.26e-08	5.76607	7.472	0.68657	BC032333,BC039586,AK292493,AF145122,AF245045,AK304669,AJ420573,AB051491	chr13:45563690-45607742	NC_000013.10	+	45563690
3020343	1.99e-06	9.32e-08	5.76456	7.46552	1.05349	NM_001127500,NM_000245,BC130420	chr7:116312458-116443071	NC_000007.13	+	116312458
3624145	2e-06	9.36e-08	5.76353	7.4611	0.820288	NM_001174116,NM_015263,NM_001174117,AF389880	chr15:51739931-51914966	NC_000015.9	-	51739931
2377165	2.02e-06	9.49e-08	5.76044	7.44787	1.1589	NM_000715,BC022312	chr1:207277590-207332055	NC_000001.10	+	207277590
3667652	2.02e-06	9.5e-08	5.76027	7.44714	0.79488	NM_001017967,NM_052858,BC013376	chr16:71655003-71676408	NC_000016.9	+	71655003
3190939	2.02e-06	9.51e-08	5.76	7.44598	0.747119	NM_178001,NM_021131,NM_178000,NM_178003,NM_001193397,AK302897	chr9:131873244-131911205	NC_000009.11	+	131873244
3544678	2.02e-06	9.47e-08	5.76099	7.45024	0.746087	NM_015072,AY237126	chr14:76127336-76429484	NC_000014.8	+	76127336
2649532	2.04e-06	9.6e-08	5.75779	7.43651	0.843143	NM_016625,AK290334	chr3:157825598-158262777	NC_000003.11	+	157825598
3626826	2.05e-06	9.66e-08	5.7565	7.43099	0.840508	NM_004998,BC098392	chr15:59428428-59665071	NC_000015.9	-	59428428
3902609	2.05e-06	9.64e-08	5.75704	7.43329	0.683106	NM_030815,AY286301	chr20:30532165-30541653	NC_000020.10	-	30532165
3012019	2.09e-06	9.88e-08	5.75135	7.40892	1.08588	NM_001185072,NM_001185073,NM_012129,BC068532	chr7:90032651-90142687	NC_000007.13	+	90032651
2946324	2.09e-06	9.88e-08	5.75133	7.40881	0.930329	NM_003530,NM_021065,BC031333,BC093807	chr6:26195412-26199471	NC_000006.11	-	26195412
2545653	2.1e-06	9.94e-08	5.75009	7.40353	0.841338	NM_002437,BC001115,AF088036,AK123373,AK093305,AK311549	chr2:27532365-27547299	NC_000002.11	-	27532365
2976113	2.11e-06	1e-07	5.74833	7.39597	0.935108	NM_000416,BC005333	chr6:137518624-137540586	NC_000006.11	-	137518624
2429842	2.11e-06	1e-07	5.74861	7.39719	0.823536	NR_026665,NM_001779,NM_001144822,AK291980,BT019816,BT019817,CR456939,BC005930,AK125710,AK026834	chr1:117032276-117113690	NC_000001.10	-	117032276
2446447	2.11e-06	1e-07	5.74832	7.39595	0.784486	NM_032360,BC006505	chr1:180245556-180472069	NC_000001.10	-	180245556
3833757	2.12e-06	1.01e-07	5.74695	7.39005	0.738811	NM_004596,BC000405	chr19:41248341-41271279	NC_000019.9	+	41248341
3677752	2.13e-06	1.01e-07	5.74647	7.388	0.79887	NM_016292,AF154108,BX648257	chr16:3700637-3773274	NC_000016.9	-	3700637
3376235	2.13e-06	1.01e-07	5.74561	7.38431	0.798594	NM_018093,AK292330,NR_002716	chr11:62600051-62609281	NC_000011.9	-	62600051
2989050	2.15e-06	1.02e-07	5.74319	7.37398	0.786666	NM_018890,NM_006908,BC050687	chr7:6400135-6443596	NC_000007.13	+	6400135
3608113	2.2e-06	1.05e-07	5.73804	7.35194	0.883408	NM_003870,BC151834	chr15:90931450-91045459	NC_000015.9	+	90931450
3737338	2.23e-06	1.07e-07	5.73438	7.33625	0.871223	NM_020914,AK127358	chr17:78323587-78370085	NC_000017.10	+	78323587
3737274	2.23e-06	1.07e-07	5.73424	7.33566	0.861545	NM_020914,AB046838	chr17:78234669-78312753	NC_000017.10	+	78234669
3662265	2.23e-06	1.06e-07	5.73496	7.33874	0.802146	NM_014669,AK294176	chr16:56742885-56881922	NC_000016.9	+	56742885
2901695	2.25e-06	1.08e-07	5.73185	7.32546	0.950367		control		---	0
3119200	2.26e-06	1.08e-07	-5.73081	7.32101	-2.08323	NM_005672,NR_033343,BC023582	chr8:143751746-143764137	NC_000008.10	+	143751746
3824993	2.27e-06	1.09e-07	5.72964	7.316	1.03288	NM_004864,BC008962,NR_036156	chr19:18485582-18499953	NC_000019.9	+	18485582
3392877	2.29e-06	1.1e-07	5.72743	7.30655	1.00105		control		---	0
3589212	2.31e-06	1.11e-07	5.72529	7.29741	0.812815	NM_173611,NM_001042429,AK095745	chr15:38746206-38778596	NC_000015.9	+	38746206
3225096	2.31e-06	1.11e-07	5.7251	7.29659	0.765277	NM_033334,NM_001489,BC030600	chr9:127279564-127534695	NC_000009.11	-	127279564
3866276	2.32e-06	1.11e-07	5.72446	7.29383	0.84138	NM_005628,NM_001145145,NM_001145144,AK292690	chr19:47277969-47291841	NC_000019.9	-	47277969
2417737	2.35e-06	1.13e-07	5.72065	7.27758	0.994667	NM_017768,BC008586	chr1:70610048-70671283	NC_000001.10	-	70610048
3495076	2.38e-06	1.15e-07	5.71806	7.2665	0.932902	NM_019080,NM_001161407,AB097028	chr13:79976827-80227869	NC_000013.10	+	79976827
3754736	2.38e-06	1.14e-07	5.71824	7.26728	0.872737	NM_152300,NM_007010,BC041785	chr17:35969797-36003487	NC_000017.10	-	35969797
2434178	2.39e-06	1.15e-07	5.71614	7.25832	0.958111	NM_001145862,NM_181873,BC094756	chr1:149900548-149911528	NC_000001.10	-	149900548
2690850	2.39e-06	1.15e-07	5.71646	7.25966	0.72938	NM_018266,BC003192,BC021277	chr3:119148194-119187805	NC_000003.11	-	119148194
3508330	2.44e-06	1.18e-07	5.71175	7.23954	1.15331	NM_006644,BX648125	chr13:31660258-31753692	NC_000013.10	-	31660258
2491935	2.44e-06	1.18e-07	5.71159	7.23885	0.858768	NM_017952,NR_004378,BC011832	chr2:86333338-86369280	NC_000002.11	+	86333338
2538480	2.45e-06	1.19e-07	5.70978	7.23116	0.661773	NM_003310,AF019952,BC002485,AK126288,AK026522,CR626366	chr2:3192703-3381614	NC_000002.11	-	3192703
2901726	2.53e-06	1.22e-07	5.70291	7.20183	0.880216		control		---	0
3088544	2.53e-06	1.23e-07	5.70202	7.19801	0.876695	NM_001693,AB208806	chr8:20054704-20098818	NC_000008.10	+	20054704
2949045	2.54e-06	1.24e-07	5.70081	7.19286	0.901618		control		---	0
3929038	2.6e-06	1.26e-07	5.69614	7.17297	0.737015	NM_018944,BC042917	chr21:33602210-33651366	NC_000021.8	-	33602210
3020646	2.61e-06	1.27e-07	5.69486	7.16748	1.43304	NM_000492	chr7:117120017-117308829	NC_000007.13	+	117120017
4019465	2.62e-06	1.28e-07	5.69319	7.16039	0.894904	NM_001173487,NM_017544,NM_001173488,AY208891	chrX:118722306-118739850	NC_000023.10	-	118722306
3644764	2.62e-06	1.28e-07	5.69351	7.16177	0.742419	NM_001761,NR_003574,NM_001089,BC012349,U17105,AK172853	chr16:2474627-2508852	NC_000016.9	+	2474627
3902489	2.62e-06	1.28e-07	5.69325	7.16062	0.702688	NM_138578,NM_001191,BC019307,AK290968,BT007208,Z23116,AY263335,BC032024,BX647525	chr20:30252264-30311792	NC_000020.10	-	30252264
3772187	2.63e-06	1.29e-07	5.69181	7.15452	0.83785	NR_002219,AF077350,AF086186	chr17:76219916-76220770	NC_000017.10	-	76219916
3978620	2.64e-06	1.29e-07	5.69125	7.15212	0.739747	NM_014481,BC002959	chrX:55026084-55034286	NC_000023.10	+	55026084
2412799	2.67e-06	1.31e-07	5.68808	7.13859	0.785577	NM_004153,NM_001190818,NM_001190819,U43416	chr1:52838181-52870131	NC_000001.10	-	52838181
3222128	2.68e-06	1.32e-07	5.68636	7.1313	0.832943	NM_005118,AF520785	chr9:117551603-117568412	NC_000009.11	-	117551603
3470287	2.68e-06	1.32e-07	5.68668	7.13263	0.821503		control		---	0
2694397	2.68e-06	1.31e-07	5.68698	7.13392	0.806495	NM_002950,BC010839	chr3:128338818-128394380	NC_000003.11	-	128338818
3718682	2.71e-06	1.33e-07	5.68363	7.11966	0.980611	NM_001030006,NM_001282,AK289528	chr17:33914293-34053356	NC_000017.10	+	33914293
3301512	2.71e-06	1.33e-07	5.68377	7.12024	0.901592	NM_002860,NM_001017423,BC117240	chr10:97365702-97416547	NC_000010.10	-	97365702
3657041	2.71e-06	1.33e-07	5.68372	7.12004	0.812506	NM_000887,M81695	chr16:31366511-31394318	NC_000016.9	+	31366511
3750872	2.72e-06	1.34e-07	5.68236	7.11425	0.847703	NM_014680,BC120873	chr17:26941432-26972163	NC_000017.10	-	26941432
3509910	2.72e-06	1.34e-07	5.68276	7.11592	0.798794	NM_001014286,NM_017569,AJ130894	chr13:37582880-37658254	NC_000013.10	-	37582880
3866302	2.72e-06	1.34e-07	5.68273	7.11583	0.688508	NM_004069,NM_021575,X97074	chr19:47341440-47379250	NC_000019.9	-	47341440
3868768	2.73e-06	1.35e-07	5.68129	7.10967	1.31327	NM_002774,NM_001012964,NM_001012965,U62801	chr19:51461893-51472929	NC_000019.9	-	51461893
3310725	2.73e-06	1.35e-07	5.68115	7.1091	1.11986	NM_024942,BC032645,NR_027282	chr10:124690417-124713899	NC_000010.10	-	124690417
2947100	2.74e-06	1.36e-07	5.67954	7.10226	0.900424	NM_003514	chr6:27859854-27860963	NC_000006.11	-	27859854
3277662	2.74e-06	1.36e-07	5.67958	7.10242	0.841717	NM_080599,NM_015542,AB037829	chr10:11944609-12085149	NC_000010.10	-	11944609
3820663	2.75e-06	1.36e-07	5.67854	7.09797	0.766249	NM_012218,NM_017620,NM_004516,NM_001137673,NM_153464,AB209062	chr19:10764547-10803074	NC_000019.9	+	10764547
2536428	2.77e-06	1.37e-07	5.67674	7.09032	1.22205		control		---	0
3474952	2.77e-06	1.38e-07	5.67526	7.084	1.12624		control		---	0
3409081	2.77e-06	1.38e-07	5.67607	7.08746	1.01245	NM_015000,AB023182	chr12:27397076-27478890	NC_000012.11	+	27397076
3534248	2.77e-06	1.38e-07	5.67552	7.0851	0.897711	NM_020937,DQ140356	chr14:45605016-45670093	NC_000014.8	+	45605016
2954005	2.77e-06	1.37e-07	5.67687	7.09087	0.865915	NM_018141,AK001429	chr6:42174539-42185613	NC_000006.11	-	42174539
2459866	2.77e-06	1.38e-07	5.67603	7.08728	0.812515	NM_018230,AK304061	chr1:229575517-229644088	NC_000001.10	-	229575517
3359910	2.77e-06	1.39e-07	5.67491	7.08251	0.804782	NM_016320,NM_139132,NM_005387,NM_139131,AF231130	chr11:3696260-3818777	NC_000011.9	-	3696260
3453370	2.77e-06	1.37e-07	5.67669	7.09011	0.646623	NM_001659,M74491	chr12:49297149-49351368	NC_000012.11	-	49297149
3386814	2.78e-06	1.39e-07	5.67435	7.08014	0.939785	NM_024116,NR_002959,NR_003033,NR_003036,NR_003026,NR_003028,NR_002973,NR_002920,NR_003032,AK128061	chr11:93463183-93474660	NC_000011.9	-	93463183
2583254	2.78e-06	1.39e-07	5.67385	7.078	0.877849	NM_002349,NM_014880,AF011333,AY314007	chr2:160625159-160761250	NC_000002.11	-	160625159
3501219	2.78e-06	1.39e-07	5.67412	7.07915	0.809811	NM_001846,AK294920	chr13:110818599-111165550	NC_000013.10	+	110818599
3980903	2.81e-06	1.41e-07	5.67154	7.06821	1.14372		control		---	0
2908495	2.82e-06	1.42e-07	5.66986	7.06104	1.04584		control		---	0
2712632	2.83e-06	1.42e-07	5.66911	7.05787	1.08452	NM_003234,NM_001128148,BC001188	chr3:195754008-195850036	NC_000003.11	-	195754008
3939545	2.84e-06	1.43e-07	5.66764	7.05161	0.828189	NM_002415,BC013976	chr22:24236139-24237342	NC_000022.10	+	24236139
3755714	2.84e-06	1.43e-07	5.66842	7.05491	0.738613	NM_004774,AF055994	chr17:37548018-37607543	NC_000017.10	-	37548018
2802696	2.85e-06	1.44e-07	5.66687	7.04834	0.983802	NM_019018,BC011524	chr5:14581911-14611192	NC_000005.9	+	14581911
4027009	2.86e-06	1.44e-07	5.66586	7.04405	0.734862	NM_001569,NM_001025242,NM_001025243,L76191	chrX:153275389-153285428	NC_000023.10	-	153275389
3527493	2.87e-06	1.45e-07	5.66461	7.0387	0.702265	NM_001641,NM_080648,NM_080649,BC008145	chr14:20922688-20926246	NC_000014.8	+	20922688
4037778	2.88e-06	1.46e-07	5.6634	7.03356	2.42198	NM_007329,NM_017579,NM_004406,AF159456	chr10:124316714-124438564	NC_000010.10	+	124316714
3380697	2.88e-06	1.46e-07	5.66306	7.03214	0.961991	NM_001360,NM_001163817,AK289497	chr11:71145475-71159447	NC_000011.9	-	71145475
3452622	2.88e-06	1.45e-07	5.66409	7.03651	0.939987	NM_024604,NM_001146075,NM_001146076,AK299465	chr12:48042296-48099808	NC_000012.11	-	48042296
2949047	2.88e-06	1.46e-07	5.66297	7.03175	0.753269		control		---	0
2369484	2.88e-06	1.45e-07	5.66429	7.03737	0.677722	NM_022371,BC007571	chr1:179050893-179067148	NC_000001.10	+	179050893
2921374	2.89e-06	1.47e-07	5.66221	7.0285	1.27667	NM_032194,AL833613	chr6:111303107-111352050	NC_000006.11	+	111303107
3237788	2.9e-06	1.47e-07	5.66156	7.02573	1.07536	NM_032812,AY358486	chr10:20104941-20570601	NC_000010.10	+	20104941
2507380	2.9e-06	1.47e-07	5.66126	7.02449	0.721169	NM_015361,NR_029672,BC041093	chr2:136289045-136482832	NC_000002.11	+	136289045
3676671	2.91e-06	1.48e-07	5.65928	7.01606	1.17361		control		---	0
3980914	2.91e-06	1.48e-07	5.65921	7.01576	0.967685		control		---	0
3696554	2.91e-06	1.48e-07	-5.66033	7.0205	-1.64941	NM_144676,BC020827	chr16:69377158-69385692	NC_000016.9	-	69377158
3980912	2.93e-06	1.5e-07	5.65755	7.00872	0.893788		control		---	0
3671727	2.94e-06	1.5e-07	5.65703	7.00652	0.866823	NM_014861,AY791884	chr16:84402143-84503914	NC_000016.9	+	84402143
2404158	2.96e-06	1.51e-07	5.65497	6.99775	1.00881	NM_006762,U51240	chr1:31205326-31323326	NC_000001.10	-	31205326
2427930	2.99e-06	1.53e-07	5.65229	6.98637	0.791055	NM_024102,BC016946	chr1:111980828-111991989	NC_000001.10	-	111980828
2510884	2.99e-06	1.53e-07	5.65256	6.98749	0.781977	NM_152522,NR_024526,AK094696	chr2:153574260-153617747	NC_000002.11	+	153574260
3236448	3.01e-06	1.54e-07	5.65038	6.97827	0.917031	NM_001193424,NM_001193425,NM_001193426,NM_001193427,NM_024670,NR_034181,BC007754,BC029360,CR457372	chr10:14920839-14946310	NC_000010.10	+	14920839
3060300	3.04e-06	1.56e-07	5.64799	6.96811	1.01237	NM_003130,NM_198901,L12387	chr7:87815762-87856359	NC_000007.13	-	87815762
3363923	3.04e-06	1.56e-07	5.64786	6.96753	0.882806	NM_016451,NM_001144061,NM_001144062,BC037280	chr11:14465006-14521396	NC_000011.9	-	14465006
3517594	3.04e-06	1.56e-07	5.64831	6.96946	0.855969	NM_014953,NM_001128226,NM_024808,AF330044	chr13:73328470-73356601	NC_000013.10	-	73328470
3572209	3.04e-06	1.56e-07	5.64855	6.97049	0.796241	NM_002632,BC001422	chr14:75408551-75422467	NC_000014.8	-	75408551
2739160	3.05e-06	1.57e-07	5.64694	6.96363	1.12129	NM_017918,BC000601,AK095936	chr4:110481295-110609874	NC_000004.11	+	110481295
2901687	3.05e-06	1.57e-07	5.6464	6.96137	0.729657	NM_001025091,NM_001090,NR_030615,BC112923,BC034488,AF027302,AK298061,AB209564,BC016772	chr6:30539124-30559289	NC_000006.11	+	30539124
3371986	3.05e-06	1.57e-07	5.64671	6.96269	0.681803	NM_015231,BC125227	chr11:47212704-47901472	NC_000011.9	-	47212704
3842141	3.07e-06	1.58e-07	5.64476	6.9544	0.876995	NM_001136134,NM_000991,NM_001136135,NM_001136136,NM_001136137,AB209627	chr19:55895814-55914690	NC_000019.9	+	55895814
3362768	3.07e-06	1.58e-07	5.64445	6.95306	0.732804		control		---	0
3453177	3.08e-06	1.59e-07	5.64359	6.94941	0.685659	NM_017822,NR_002950,NR_002968,NR_002951,AK094528	chr12:49047014-49076001	NC_000012.11	-	49047014
3807569	3.1e-06	1.61e-07	5.64115	6.93906	0.967856	NM_006111,D16294	chr18:47309886-47340793	NC_000018.9	-	47309886
2478748	3.1e-06	1.6e-07	5.64207	6.94298	0.849411	NM_019063,NM_001145076,AF177377	chr2:42396513-42565132	NC_000002.11	+	42396513
3912861	3.1e-06	1.61e-07	5.64144	6.94031	0.820978	NM_002792,BC004427	chr20:60710907-60718494	NC_000020.10	-	60710907
3708826	3.11e-06	1.61e-07	5.64076	6.93741	1.10533	NM_001416,NR_002918,NR_002912,NR_002604,AK289453	chr17:7476044-7482316	NC_000017.10	+	7476044
3980899	3.16e-06	1.64e-07	5.63659	6.91975	1.02851		control		---	0
3657367	3.17e-06	1.65e-07	5.63568	6.91586	1.05195	NM_003414,BC036367,AL832197	chr16:31822754-31928658	NC_000016.9	+	31822754
2842101	3.17e-06	1.64e-07	5.63594	6.91699	0.844862	NM_022754,AK022287	chr5:174905418-174956738	NC_000005.9	+	174905418
3898224	3.18e-06	1.66e-07	5.63429	6.90997	0.97889	NM_016649,AF068285	chr20:13693873-13767076	NC_000020.10	-	13693873
2475710	3.18e-06	1.66e-07	5.63431	6.91005	0.875698	NM_182551,NM_001002257,BC146817	chr2:30540175-30915268	NC_000002.11	+	30540175
3457752	3.21e-06	1.67e-07	5.632	6.90029	0.913765	NM_005419,NM_198332,BC051284	chr12:56735385-56753979	NC_000012.11	-	56735385
2970532	3.22e-06	1.68e-07	5.63078	6.89509	0.833582	NR_033441,NM_001527,AK296856	chr6:114240398-114363691	NC_000006.11	-	114240398
3951927	3.22e-06	1.68e-07	5.63147	6.89802	0.724866	NM_197966,NM_001196,NM_197967,BC036364	chr22:18216803-18257516	NC_000022.10	-	18216803
2611848	3.24e-06	1.69e-07	5.62967	6.89038	0.761902	NM_003043,NM_001134367,NM_001134368,BC137128,BC137129,U16120,U09220,AK303649,BC111489,BC006252,AK023516,BC038790,AK309534,AK307284	chr3:14274182-14530854	NC_000003.11	+	14274182
2775965	3.24e-06	1.7e-07	5.62885	6.88692	0.681505	NM_015697,BC020728	chr4:84184981-84205964	NC_000004.11	-	84184981
2592268	3.26e-06	1.71e-07	5.62731	6.88038	1.00189	NM_007315,NM_139266,AK292604	chr2:191829038-191878936	NC_000002.11	-	191829038
3907652	3.27e-06	1.71e-07	5.62655	6.87717	0.719188	NM_020967,BC140836	chr20:44689641-44718591	NC_000020.10	-	44689641
3832643	3.28e-06	1.72e-07	5.62599	6.8748	0.821229	NM_004924,BC005033	chr19:39138290-39221163	NC_000019.9	+	39138290
3580769	3.3e-06	1.73e-07	-5.62404	6.86655	-1.31288	NM_001823,AK290101	chr14:103986037-103995389	NC_000014.8	-	103986037
2709750	3.31e-06	1.74e-07	-5.62358	6.8646	-2.11547	NM_001048,BC032625	chr3:187386708-187388181	NC_000003.11	-	187386708
3401756	3.32e-06	1.75e-07	5.62189	6.85741	1.14702	NM_020375,AY425618	chr12:4430305-4464453	NC_000012.11	+	4430305
3523156	3.32e-06	1.75e-07	5.6217	6.85663	0.9009	NM_032813,NM_001079669,AK290345	chr13:101255880-101399620	NC_000013.10	-	101255880
3454296	3.32e-06	1.75e-07	5.62215	6.85852	0.85342	NM_147190,BC033558	chr12:50523306-50561210	NC_000012.11	-	50523306
2440476	3.32e-06	1.75e-07	5.62147	6.85563	0.846055	NM_016946,NM_001113205,NM_001113207,NM_001113206,AF172398	chr1:160965016-161008754	NC_000001.10	-	160965016
2366581	3.32e-06	1.76e-07	5.62099	6.85361	0.808397	BC091516,BC107169,BC107168,AK294569,AK303296,AK299369,AK127098,AL354614,AK001568,AK023532,BC062689	chr1:169631255-169823479	NC_000001.10	+	169631255
2442698	3.32e-06	1.75e-07	5.62184	6.85721	0.759213	NM_003851,AF084523	chr1:167506905-167523036	NC_000001.10	-	167506905
3838118	3.32e-06	1.75e-07	5.62137	6.85523	0.696754	NM_006666,AK057498	chr19:49496795-49519232	NC_000019.9	+	49496795
3049025	3.32e-06	1.76e-07	5.62102	6.85375	0.685418	NM_004749,NM_030900,NM_199122,NR_002919,NR_002990,NR_002991,BC014918,BC017235,AK300489,AK298155,AF011792,AK092132	chr7:45137213-45161843	NC_000007.13	-	45137213
3384270	3.36e-06	1.78e-07	5.61825	6.842	0.941037	NM_199418,NM_005040,BC001500	chr11:82522573-82612699	NC_000011.9	-	82522573
3884800	3.36e-06	1.78e-07	5.61796	6.84077	0.727495	NM_024855,BC038402	chr20:37376896-37454288	NC_000020.10	+	37376896
3630217	3.39e-06	1.8e-07	5.61579	6.83162	1.21884		control		---	0
3736232	3.42e-06	1.82e-07	5.61324	6.82082	0.931834	NM_004710,BC000407	chr17:76164706-76169588	NC_000017.10	+	76164706
3105600	3.42e-06	1.82e-07	-5.61336	6.8213	-1.97145	NM_000067,BC011949	chr8:86367769-86393719	NC_000008.10	+	86367769
3470272	3.43e-06	1.82e-07	5.61219	6.81638	1.10224		control		---	0
2358520	3.45e-06	1.84e-07	5.61077	6.81036	0.645901	NM_001145415,NM_012432,NR_026977,BC028671	chr1:150898787-150938646	NC_000001.10	+	150898787
3205108	3.46e-06	1.85e-07	5.60946	6.80483	0.90664	NM_001128227,NM_005476,NM_001190388,NM_001190383,NM_001190384,BC121179	chr9:36214441-36277002	NC_000009.11	-	36214441
3925639	3.46e-06	1.84e-07	5.60979	6.80619	0.861488	NM_003489,AK289786	chr21:16333254-16437311	NC_000021.8	-	16333254
3884922	3.46e-06	1.84e-07	5.61026	6.8082	0.746448	NR_033905,NM_021931,NM_001190809,BC132669,AK303396,AK296793,AK296506,AF086439,AK056710	chr20:37590923-37679545	NC_000020.10	+	37590923
2339682	3.47e-06	1.85e-07	5.60887	6.80233	0.888072	NM_013339,AF063604	chr1:63833281-63902869	NC_000001.10	+	63833281
3755510	3.47e-06	1.86e-07	5.6083	6.79992	0.728591	NM_020405,AF378753	chr17:37219566-37309613	NC_000017.10	-	37219566
2510485	3.53e-06	1.89e-07	5.60471	6.78473	0.885639	NM_018151,NM_001177663,NM_001177665,NM_001177664,AY585745	chr2:152266428-152364522	NC_000002.11	+	152266428
3294159	3.54e-06	1.89e-07	5.60374	6.7806	1.20323	NM_000917,NM_001017962,NM_001142595,NM_001142596,BC034998	chr10:74765589-74856797	NC_000010.10	-	74765589
3594129	3.54e-06	1.9e-07	5.60294	6.77725	0.841954	NM_002748,BC035492	chr15:52311448-52358882	NC_000015.9	+	52311448
3126087	3.54e-06	1.89e-07	5.60394	6.78148	0.807315	NM_177924,NM_004315,NM_001127505,BC016481	chr8:17889125-18047228	NC_000008.10	-	17889125
2902559	3.54e-06	1.9e-07	5.60275	6.77644	0.698042	NM_001320,BC112017,BC112019,AY113186,CR541699,AK300671,CR592250,AK308742,CR598133	chr6:31633039-31638100	NC_000006.11	+	31633039
3579546	3.57e-06	1.92e-07	5.60054	6.76711	0.850928	NM_004184,NM_173701,NM_213646,NM_213645,BC017489	chr14:100800134-100843142	NC_000014.8	-	100800134
3878836	3.57e-06	1.92e-07	5.60083	6.76831	0.683201	NM_018993,AK094884	chr20:19831810-19983101	NC_000020.10	+	19831810
3257268	3.59e-06	1.93e-07	5.59905	6.76081	0.856975	NM_012420,U34605	chr10:91174345-91180754	NC_000010.10	+	91174345
3389976	3.68e-06	1.98e-07	5.59352	6.73741	0.941134	NM_017515,AK128062	chr11:107627830-107799009	NC_000011.9	-	107627830
3179359	3.68e-06	1.98e-07	5.59305	6.73544	0.907451	NM_001012267,NM_022755,BC071726,AF351202,BC026154,AK091247,AL833701,AK096392	chr9:95087770-95378389	NC_000009.11	+	95087770
3421706	3.68e-06	1.98e-07	5.59327	6.73638	0.868559	NM_175623,NM_022456,NM_175625,NM_175624,NM_001024647,BC014553	chr12:70083663-70211221	NC_000012.11	+	70083663
2440143	3.71e-06	2e-07	5.59099	6.72673	0.837067	NM_001098398,NM_004371,BC038447	chr1:160258391-160313449	NC_000001.10	-	160258391
2908498	3.71e-06	2.01e-07	5.59052	6.72477	0.766868		control		---	0
3845868	3.72e-06	2.01e-07	5.59023	6.72353	0.772623	NM_016199,BC018621	chr19:2321529-2328710	NC_000019.9	-	2321529
3394183	3.77e-06	2.04e-07	5.58696	6.7097	0.687211	NM_002105,BC011694	chr11:118964615-118966819	NC_000011.9	-	118964615
3454006	3.79e-06	2.05e-07	5.58523	6.7024	0.775235	NM_175736,NM_198900,BC159100	chr12:50030281-50101166	NC_000012.11	-	50030281
2638962	3.84e-06	2.08e-07	5.58214	6.68937	0.960557	NM_138287,BC042191	chr3:122283150-122294032	NC_000003.11	+	122283150
2320064	3.85e-06	2.09e-07	5.58107	6.68485	1.27456		control		---	0
3666566	3.85e-06	2.09e-07	5.581	6.68455	1.02243	NM_032830,AB075868	chr16:69165227-69203571	NC_000016.9	+	69165227
2597347	3.88e-06	2.11e-07	-5.57925	6.67717	-1.0507	NM_001608,BC039063	chr2:211029317-211115441	NC_000002.11	-	211029317
2523144	3.89e-06	2.12e-07	5.57831	6.67321	0.967941	NM_015934,NR_003031,BC032592	chr2:203103101-203218722	NC_000002.11	+	203103101
2501697	3.89e-06	2.12e-07	5.57846	6.67383	0.96459	NM_005721,BC044590,NR_034128	chr2:114644105-114785655	NC_000002.11	+	114644105
3362739	3.89e-06	2.12e-07	5.57819	6.6727	0.830126		control		---	0
2573232	3.89e-06	2.12e-07	5.57803	6.67203	0.59737	NR_000034,AK090980	chr2:120975061-120980974	NC_000002.11	-	120975061
2949063	3.92e-06	2.14e-07	5.57596	6.66329	0.800771		control		---	0
2434319	4e-06	2.18e-07	5.57126	6.64347	0.851848	NM_030920,NM_001136478,NM_001136479,AY057381	chr1:150190723-150214867	NC_000001.10	-	150190723
2380440	4e-06	2.19e-07	5.57082	6.64164	0.707727	NM_138796,AY963797	chr1:217802717-218040910	NC_000001.10	+	217802717
3757840	4.02e-06	2.2e-07	5.56973	6.63701	0.879883	NM_139276,NM_003150,NM_213662,AK291933	chr17:40465347-40540675	NC_000017.10	-	40465347
3864597	4.04e-06	2.21e-07	5.56804	6.62991	0.680313	NM_019108,BC008869	chr19:44235312-44259821	NC_000019.9	-	44235312
3944826	4.05e-06	2.22e-07	5.56753	6.62775	0.658356	NM_018957,AK124370	chr22:38030671-38124259	NC_000022.10	+	38030671
2570193	4.08e-06	2.24e-07	5.56584	6.62065	1.17256	NM_005434,BC003179,NR_027145,NR_027143,NR_027142	chr2:110841451-111181719	NC_000002.11	-	110841451
3400190	4.09e-06	2.24e-07	5.56484	6.61643	0.794543	NM_032358,NM_001130146,NM_001130147,NM_001130148,BC006444	chr12:498459-551804	NC_000012.11	+	498459
4026902	4.1e-06	2.25e-07	5.5641	6.61331	0.695498	NM_003491,AY183134	chrX:153194312-153200513	NC_000023.10	-	153194312
2358736	4.16e-06	2.29e-07	5.5604	6.59772	0.684855	NM_024575,AF271774	chr1:151129125-151133227	NC_000001.10	+	151129125
3555903	4.21e-06	2.32e-07	5.55762	6.586	0.832026		control		---	0
3228191	4.24e-06	2.34e-07	5.55574	6.57808	0.844684	NM_022779,NM_138620,AF427339	chr9:135467148-135545788	NC_000009.11	-	135467148
2556302	4.25e-06	2.34e-07	5.55522	6.57589	0.802565	NM_020651,AF302505	chr2:64319786-64371787	NC_000002.11	-	64319786
2987632	4.25e-06	2.34e-07	5.55502	6.57506	0.654852	NM_025250,BC152447	chr7:2666169-2704428	NC_000007.13	+	2666169
2406261	4.26e-06	2.35e-07	5.55407	6.57107	1.40177		control		---	0
2645764	4.28e-06	2.36e-07	5.55302	6.56663	0.939412	NM_001679,AK293697	chr3:141594921-141645648	NC_000003.11	+	141594921
3991698	4.3e-06	2.37e-07	5.55194	6.56212	1.00395	NM_000194,M31642	chrX:133594194-133669219	NC_000023.10	+	133594194
3168066	4.31e-06	2.39e-07	-5.55091	6.55777	-1.41604	NM_001216,BC014950	chr9:35673863-35682179	NC_000009.11	+	35673863
3079172	4.34e-06	2.41e-07	5.54894	6.54949	0.803232	NM_014020,NM_001101311,NM_001101312,NM_001101314,AK097304	chr7:150488310-150574233	NC_000007.13	-	150488310
2952065	4.35e-06	2.41e-07	5.54851	6.54768	0.663805	NM_016059,AY359032	chr6:36822609-36853741	NC_000006.11	-	36822609
3332913	4.36e-06	2.42e-07	5.54765	6.54403	0.725358	NM_001173990,NM_001173991,NM_016499,BC011010	chr11:61159577-61186956	NC_000011.9	+	61159577
3969713	4.38e-06	2.43e-07	5.54624	6.53813	0.959517	NM_152581,NM_001177475,BC030641	chrX:14890996-15015583	NC_000023.10	+	14890996
3147591	4.38e-06	2.43e-07	5.54649	6.53918	0.89574	NM_015878,NM_148174,BC013420	chr8:103838549-103884791	NC_000008.10	-	103838549
3383322	4.39e-06	2.44e-07	5.54526	6.534	0.865553	NM_024678,NR_027479,BC007800	chr11:78146241-78285889	NC_000011.9	-	78146241
3477917	4.39e-06	2.44e-07	5.54578	6.5362	0.790179	NM_145648,AY038999	chr12:129277749-129314862	NC_000012.11	-	129277749
2320068	4.4e-06	2.45e-07	5.5447	6.53165	0.840335		control		---	0
2908508	4.4e-06	2.45e-07	5.54447	6.53066	0.74528		control		---	0
3831272	4.44e-06	2.48e-07	5.54209	6.52065	1.18415		control		---	0
3959388	4.44e-06	2.48e-07	5.54207	6.5206	0.835398	NM_030643,NM_145660,AY014914,AY014915,BC006276,AF305226,AK290466,AK290777,CR456380	chr22:36584927-36600879	NC_000022.10	-	36584927
3699782	4.44e-06	2.48e-07	5.54187	6.51973	0.81578		control		---	0
3844238	4.46e-06	2.5e-07	5.5405	6.51396	0.709686	NM_005762,X97548	chr19:59048785-59062119	NC_000019.9	+	59048785
3023483	4.47e-06	2.5e-07	5.54011	6.51235	0.821916	NM_020704,NM_001134336,AK290165,BC050400	chr7:129074314-129152753	NC_000007.13	+	129074314
3591400	4.51e-06	2.53e-07	5.53758	6.50171	0.80113	NM_014444,AK026551	chr15:43663283-43700509	NC_000015.9	+	43663283
3541450	4.61e-06	2.58e-07	-5.53258	6.4807	-1.07733	NM_152443,BC025724,AK128496	chr14:68162920-68201163	NC_000014.8	+	68162920
3470265	4.63e-06	2.6e-07	5.53157	6.47644	1.12069		control		---	0
2565262	4.65e-06	2.61e-07	5.53022	6.4708	0.765379	NM_014014,AY572488,BC131784,AK303663,AF085356,AK303465,AK021418,AK021583,CR614576,XM_941485	chr2:96940080-96971284	NC_000002.11	-	96940080
2681195	4.67e-06	2.63e-07	5.5284	6.46315	0.944344	NM_003968,NM_198195,AF046024	chr3:69103729-69129560	NC_000003.11	-	69103729
3896200	4.67e-06	2.63e-07	5.52894	6.46542	0.905391	NM_002592,NM_182649,NR_028370,BC062439	chr20:5095519-5107270	NC_000020.10	-	5095519
3303392	4.67e-06	2.63e-07	5.52838	6.46306	0.899611	NM_001001342,NM_173809,AK298969	chr10:102033713-102046416	NC_000010.10	-	102033713
3362765	4.68e-06	2.64e-07	5.52806	6.46173	1.37966		control		---	0
2695393	4.68e-06	2.64e-07	5.52776	6.46046	0.797633	NM_007208,NR_002985,AK296626	chr3:131118452-131221837	NC_000003.11	-	131118452
3113456	4.72e-06	2.66e-07	5.5256	6.45138	0.786882	NM_022045,BC013136	chr8:121457666-121554383	NC_000008.10	+	121457666
3525679	4.76e-06	2.69e-07	5.5236	6.44299	0.828687	NM_017664,AK000100	chr13:111524145-111567416	NC_000013.10	-	111524145
3829751	4.77e-06	2.69e-07	5.52294	6.44021	0.701848	NM_032346,BC006146	chr19:34895303-34917070	NC_000019.9	+	34895303
3191273	4.78e-06	2.7e-07	5.52209	6.43666	0.731148	NM_001136557,NM_001136558,NM_020960,BC110518,AK125285	chr9:132815995-132897400	NC_000009.11	+	132815995
3445028	4.79e-06	2.71e-07	5.52151	6.43423	1.04525	NM_006143,AK096388	chr12:12813825-12849111	NC_000012.11	-	12813825
3973839	4.79e-06	2.72e-07	5.52106	6.43235	1.02528	NM_000397,BC032720	chrX:37639287-37694178	NC_000023.10	+	37639287
2873105	4.79e-06	2.71e-07	5.52145	6.43399	0.903303	NM_000943,AK290321	chr5:122354747-122372647	NC_000005.9	-	122354747
3540398	4.92e-06	2.79e-07	5.51457	6.40512	0.703788	NM_002028,AK093298	chr14:65450485-65529359	NC_000014.8	+	65450485
2410241	4.93e-06	2.8e-07	5.51371	6.40149	0.7745	NM_002574,NM_181696,NM_181697,BC007063	chr1:45975677-45993525	NC_000001.10	-	45975677
3668617	4.93e-06	2.8e-07	5.51398	6.40263	0.765186	NM_002811,BC012606	chr16:74330681-74344027	NC_000016.9	+	74330681
2438344	4.93e-06	2.8e-07	5.51397	6.40259	0.658851	NM_182679,NM_015590,AK293026	chr1:156564118-156571446	NC_000001.10	-	156564118
3079313	5.01e-06	2.85e-07	5.50966	6.38454	0.723568	NM_004935,NM_001164410,BC005115	chr7:150750899-150755018	NC_000007.13	-	150750899
2526980	5.04e-06	2.87e-07	5.50846	6.3795	0.862939	NM_021141,M30938,AK125369	chr2:216971308-217086200	NC_000002.11	+	216971308
2748163	5.04e-06	2.87e-07	5.50812	6.37806	0.755808	NM_032117,BC032142	chr4:154265801-154336244	NC_000004.11	+	154265801
3048134	5.05e-06	2.88e-07	5.50762	6.37597	0.771613	NM_018224,AK023053	chr7:43648056-43808367	NC_000007.13	-	43648056
3765642	5.06e-06	2.89e-07	5.50669	6.37207	0.792869	NR_026641,NM_020748,AK299032	chr17:59942735-60005357	NC_000017.10	-	59942735
2476075	5.07e-06	2.9e-07	5.50641	6.37091	0.76786	NM_014946,NM_199436,AB029006	chr2:32288680-32382705	NC_000002.11	+	32288680
3661684	5.1e-06	2.92e-07	5.50446	6.36271	1.21036	NM_004530,NM_001127891,AL832088	chr16:55423622-55540580	NC_000016.9	+	55423622
3724197	5.11e-06	2.93e-07	5.50383	6.36007	0.757553	NM_006178,NR_033799,AF135168	chr17:44643462-44834826	NC_000017.10	+	44643462
3816153	5.11e-06	2.92e-07	5.50409	6.36118	0.688312	NM_001319,AF001177	chr19:1929855-1981331	NC_000019.9	+	1929855
3886889	5.13e-06	2.94e-07	5.50263	6.35505	0.789705	NM_015937,NM_001184729,NM_001184728,NM_001184730,AY358588,BC136827,BC136828,BC015022,AK296063,AF132940,AB057724,AK293294,AK296139,AK293686,AK316358,AK302093,AK299013,AK301815,AK297830,BX537612,AK130385,CR593007,AF305815	chr20:44044737-44080727	NC_000020.10	+	44044737
3135567	5.18e-06	2.98e-07	5.49997	6.34391	1.26575	NM_006330,AF081281	chr8:54958939-55014577	NC_000008.10	-	54958939
3106539	5.18e-06	2.97e-07	5.5004	6.34571	0.883812	NM_016023,AK293843	chr8:92082448-92099319	NC_000008.10	+	92082448
3439063	5.2e-06	2.99e-07	5.49898	6.33976	0.86386	NM_019591,BC046206	chr12:133151334-133590475	NC_000012.11	+	133151334
3150663	5.21e-06	3e-07	5.49849	6.33771	0.851606	NM_003184,AF026445	chr8:120743015-120845064	NC_000008.10	-	120743015
3212321	5.28e-06	3.04e-07	5.49481	6.32231	0.947192		control		---	0
4021633	5.28e-06	3.04e-07	5.49511	6.32358	0.775767	NM_182314,NM_006375,BC140874	chrX:129700619-130037208	NC_000023.10	-	129700619
3040454	5.28e-06	3.04e-07	5.49503	6.32325	0.674097	NM_001002926,BC130298	chr7:19735086-19748639	NC_000007.13	-	19735086
3763148	5.29e-06	3.06e-07	5.4939	6.3185	0.828519	NM_004375,NR_027941,NR_027942,NM_001162861,NM_001162862,NM_005486,AF044321	chr17:52997339-53061381	NC_000017.10	-	52997339
3436544	5.29e-06	3.05e-07	5.49416	6.31961	0.811742	NM_080626,BC034525	chr12:125478194-125540659	NC_000012.11	+	125478194
3913712	5.33e-06	3.08e-07	5.49199	6.31051	0.735992	NM_017798,BC050284	chr20:61826785-61860428	NC_000020.10	-	61826785
2399743	5.34e-06	3.09e-07	-5.49175	6.30951	-1.23699	NM_012067,NM_201252,NM_001145289,NR_002796,AF040639,NM_003689	chr1:19608767-19615709	NC_000001.10	-	19608767
3413604	5.37e-06	3.11e-07	5.49022	6.30312	0.732853	NM_000725,AK122911	chr12:49208235-49222723	NC_000012.11	+	49208235
3830216	5.37e-06	3.11e-07	5.48986	6.3016	0.699993	NR_028406,NM_144779,NM_014164,NM_001164605,AB072911,BX648809	chr19:35645571-35660785	NC_000019.9	+	35645571
2840640	5.46e-06	3.16e-07	5.48598	6.28539	1.19849		control		---	0
3649811	5.5e-06	3.19e-07	5.48375	6.27606	0.770321	NM_001143979,NM_017668,BC033900	chr16:15737134-15820337	NC_000016.9	+	15737134
3212334	5.5e-06	3.19e-07	5.48387	6.27654	0.739662		control		---	0
3377886	5.52e-06	3.21e-07	5.48236	6.27024	0.88568	NM_005507,AK097690	chr11:65590493-65630220	NC_000011.9	-	65590493
3684486	5.52e-06	3.21e-07	5.48263	6.27138	0.858056	NM_005849,BC017844,BX647201	chr16:21638071-21663967	NC_000016.9	-	21638071
3365487	5.52e-06	3.21e-07	5.48247	6.27071	0.745512	NM_001040697,NM_018314,AK316191	chr11:18551156-18610509	NC_000011.9	-	18551156
3901055	5.55e-06	3.23e-07	5.48111	6.26499	0.949387	NM_012072,U94333	chr20:23031271-23074539	NC_000020.10	-	23031271
2550790	5.58e-06	3.26e-07	5.47925	6.25724	0.945524	NM_133259,AY289212	chr2:44108000-44231624	NC_000002.11	-	44108000
2648074	5.58e-06	3.25e-07	-5.47944	6.25802	-1.79127	NM_001086,L32179	chr3:151515292-151546270	NC_000003.11	+	151515292
3569257	5.6e-06	3.27e-07	5.47842	6.25376	1.17664	NM_016445,AF228603	chr14:67853483-67878884	NC_000014.8	-	67853483
3722129	5.6e-06	3.27e-07	-5.47804	6.25219	-1.01021	NM_173478,NM_003766,BC026187,BX647788	chr17:40950810-40963595	NC_000017.10	+	40950810
3664785	5.62e-06	3.29e-07	5.4769	6.24742	0.939881	NM_016951,NM_001040138,NM_181641,NM_181640,NM_016326,AF057306	chr16:66586253-66600283	NC_000016.9	+	66586253
3156307	5.62e-06	3.29e-07	5.47686	6.24726	0.738423	NM_153831,NM_005607,AB209083	chr8:141668019-142011361	NC_000008.10	-	141668019
3108433	5.71e-06	3.35e-07	5.4731	6.23156	0.722856	NM_178812,BC045642	chr8:98656407-98742479	NC_000008.10	+	98656407
3378790	5.79e-06	3.39e-07	5.46985	6.21796	0.927289	NM_001008709,NM_002708,NM_206873,AK127616	chr11:67165660-67188644	NC_000011.9	-	67165660
3214582	5.8e-06	3.4e-07	5.46911	6.21488	0.747466	NM_006415,NM_178324,BC068537	chr9:94765899-94877690	NC_000009.11	-	94765899
3289031	5.87e-06	3.45e-07	5.46629	6.2031	0.956678	NM_006327,AY442341	chr10:51510781-51623376	NC_000010.10	-	51510781
3421523	5.91e-06	3.47e-07	5.46455	6.19583	0.961362	NM_006530,U61384	chr12:69753464-69785079	NC_000012.11	+	69753464
3717395	5.92e-06	3.48e-07	5.46396	6.19338	1.00178	NM_015355,AK290014	chr17:30234742-30328064	NC_000017.10	+	30234742
2862696	5.92e-06	3.48e-07	5.46411	6.194	0.852983	NM_003633,AF059611	chr5:73923235-73937249	NC_000005.9	-	73923235
3686339	5.92e-06	3.49e-07	5.46343	6.19118	0.78006	NM_015171,AK123846	chr16:28109303-28223233	NC_000016.9	-	28109303
3718791	5.92e-06	3.49e-07	5.46346	6.19131	0.642322	NM_139215,NM_003487,U51334	chr17:34136483-34191599	NC_000017.10	+	34136483
3864551	5.95e-06	3.51e-07	5.46226	6.18627	0.982454	NM_002659,NM_001005376,NM_001005377,BC002788	chr19:44150025-44174699	NC_000019.9	-	44150025
3319840	5.97e-06	3.52e-07	5.46124	6.18202	0.881332	NM_006391,NR_002962,BC114929	chr11:9406126-9469720	NC_000011.9	+	9406126
3761395	5.97e-06	3.52e-07	5.46102	6.18112	0.833709	NM_018952,AK292200	chr17:46673113-46682334	NC_000017.10	-	46673113
3136015	5.98e-06	3.53e-07	5.46051	6.179	0.83615	NM_152417,BC043417	chr8:56545020-56685916	NC_000008.10	-	56545020
3884640	6.04e-06	3.58e-07	5.45773	6.16738	0.756711	NM_020336,AB033045	chr20:37101442-37207652	NC_000020.10	+	37101442
3153428	6.07e-06	3.59e-07	5.45675	6.16332	0.801443	NM_018482,BC137135	chr8:131064358-131455918	NC_000008.10	-	131064358
2518743	6.07e-06	3.59e-07	5.45654	6.16244	0.757105	NM_138285,AK298199	chr2:183982268-184044101	NC_000002.11	+	183982268
4009288	6.08e-06	3.61e-07	5.45578	6.15927	0.813366	NM_004493,NM_001037811,U96132	chrX:53458215-53461440	NC_000023.10	-	53458215
3724782	6.09e-06	3.61e-07	5.45527	6.15713	0.763492	NM_002265,L38951	chr17:45727273-45762869	NC_000017.10	+	45727273
2714955	6.14e-06	3.64e-07	5.45332	6.14899	0.702814	NM_006342,AF093543	chr4:1722818-1746895	NC_000004.11	+	1722818
3631397	6.17e-06	3.67e-07	5.45196	6.14335	0.955826	NM_018003,NM_001008224,AF322916	chr15:70948139-71058350	NC_000015.9	-	70948139
2405312	6.17e-06	3.67e-07	5.45186	6.14291	0.774596	NM_001127361,NM_153341,AK131439	chr1:33399533-33430756	NC_000001.10	-	33399533
3919278	6.18e-06	3.68e-07	-5.45117	6.14004	-1.28928	NM_053277,AF448439	chr21:36003007-36090519	NC_000021.8	+	36003007
2321182	6.19e-06	3.69e-07	5.45058	6.13756	0.861463	NM_006474,NM_198389,NM_001006624,NM_001006625,AY194238,BC014668,BC022812,AF390106,AF030428,AB127958,AF030427,AK307705,AK307706	chr1:13852121-13979989	NC_000001.10	+	13852121
3698919	6.21e-06	3.7e-07	5.44981	6.13436	0.739709	NR_027264,NM_001145667,NM_012201,NM_001145666,NR_027265,U64791	chr16:74458103-74652302	NC_000016.9	-	74458103
2908503	6.23e-06	3.72e-07	5.44861	6.12936	1.0396		control		---	0
2779486	6.27e-06	3.74e-07	5.44724	6.12365	0.958644	NM_002106,AK056803	chr4:100869140-100872287	NC_000004.11	-	100869140
3759077	6.3e-06	3.77e-07	5.44573	6.11738	0.626046	NM_001143780,NM_016016,AB209576	chr17:42396996-42402218	NC_000017.10	-	42396996
3362775	6.31e-06	3.77e-07	5.44528	6.11548	0.643033		control		---	0
2328868	6.34e-06	3.79e-07	5.44395	6.10994	0.894515	NM_004964,D50405	chr1:32757707-32800226	NC_000001.10	+	32757707
3301011	6.35e-06	3.81e-07	5.44331	6.10731	0.963906	NM_022451,BC049850	chr10:96092989-96122713	NC_000010.10	-	96092989
2626802	6.37e-06	3.82e-07	5.44247	6.1038	0.753164	NM_002841,BC140904	chr3:61547245-62284563	NC_000003.11	+	61547245
3683050	6.39e-06	3.83e-07	5.44174	6.10076	0.801154	NM_015092,AB061371,NR_002453,NR_002473,AK300040,AK304513,BC063703	chr16:18811880-18937817	NC_000016.9	-	18811880
3336378	6.43e-06	3.86e-07	5.43998	6.09343	0.762777	NM_006328,BC000488,AF080561,AF315632,AF315633,DQ294957,AK297907,EU287938,AK292805,AB209007	chr11:66384062-66394800	NC_000011.9	+	66384062
3963676	6.46e-06	3.88e-07	5.4387	6.08811	0.682153	NM_001009880,NM_015264,AK094937	chr22:45588125-45644928	NC_000022.10	-	45588125
3732373	6.47e-06	3.89e-07	5.43839	6.08678	0.83348	NM_015462,NR_003706,BC064404	chr17:65714064-65775480	NC_000017.10	+	65714064
3791996	6.49e-06	3.91e-07	5.43718	6.08178	1.00306	NM_002640,NM_198833,NM_001031848,L40377	chr18:61636638-61672258	NC_000018.9	+	61636638
3831260	6.49e-06	3.9e-07	5.43741	6.08271	0.943862	NM_007145,NM_001099638,NM_001099639,BC110500	chr19:36706033-36729663	NC_000019.9	+	36706033
3300350	6.51e-06	3.92e-07	5.43646	6.07877	0.782178	NM_004969,NM_001165946,BX648462	chr10:94196769-94333974	NC_000010.10	-	94196769
3724969	6.54e-06	3.94e-07	5.435	6.07269	0.798145	NM_018129,BC006525	chr17:46018775-46026667	NC_000017.10	+	46018775
3886765	6.56e-06	3.96e-07	5.43403	6.06864	1.73278	NM_002638,BC010952	chr20:43803498-43805166	NC_000020.10	+	43803498
3154136	6.56e-06	3.96e-07	5.43384	6.06786	1.06509	NM_012472,BC027589	chr8:133584223-133696285	NC_000008.10	-	133584223
3676686	6.56e-06	3.96e-07	5.43384	6.06784	0.968367		control		---	0
2808290	6.58e-06	3.98e-07	5.43309	6.06474	0.838705	NM_003432,AK299315	chr5:43085677-43176417	NC_000005.9	+	43085677
2711818	6.58e-06	3.99e-07	5.43223	6.06116	0.797117	NM_018385,BC068500	chr3:194361526-194392937	NC_000003.11	-	194361526
2432647	6.58e-06	3.99e-07	5.43254	6.06247	0.745065	NM_006468,NM_001012758,NM_006099,BC002586,BC001154,AK091752	chr1:145585835-145621863	NC_000001.10	-	145585835
2360083	6.58e-06	3.99e-07	5.43262	6.06279	0.679881	NM_014847,NM_001127320,AK302662	chr1:154192515-154244077	NC_000001.10	+	154192515
3302360	6.58e-06	3.99e-07	5.43248	6.06222	0.661593	NM_022362,AF319947,AK298995,BC117129,BC080532,AF357881,AK304287,BC007298	chr10:99216683-99270900	NC_000010.10	-	99216683
3555898	6.59e-06	4e-07	5.43162	6.05864	0.912078		control		---	0
2377229	6.6e-06	4.01e-07	5.43117	6.05677	1.00368	NM_001114752,NM_000574,AB240570	chr1:207494865-207541048	NC_000001.10	+	207494865
4002173	6.62e-06	4.02e-07	5.43048	6.0539	1.01898	NM_004586,AB208933	chrX:20168033-20344332	NC_000023.10	-	20168033
3214749	6.69e-06	4.07e-07	5.42759	6.04186	0.78733	NR_024020,NM_017948,AB105104,BC146810,AB109030,AK297355,BC035041,BC008491	chr9:95059650-95087867	NC_000009.11	-	95059650
3725813	6.7e-06	4.08e-07	5.4273	6.04068	0.832246		control		---	0
2908502	6.78e-06	4.14e-07	5.42396	6.02679	0.902074		control		---	0
3301914	6.78e-06	4.14e-07	5.42393	6.02664	0.746893	NM_152309,AK122584	chr10:98352818-98480269	NC_000010.10	-	98352818
3825911	6.78e-06	4.13e-07	5.42435	6.02837	0.72592	NM_033204,AK097169	chr19:19778990-19821239	NC_000019.9	+	19778990
3530982	6.79e-06	4.15e-07	5.42318	6.02354	0.89155	NM_017769,BC000973	chr14:31028362-31089250	NC_000014.8	+	31028362
3961842	6.79e-06	4.15e-07	5.42315	6.02342	0.751959	NM_002883,AB058738	chr22:41639496-41698081	NC_000022.10	-	41639496
3216671	6.84e-06	4.18e-07	5.42141	6.01615	1.05909	NM_001333,BC067289	chr9:99775101-99918867	NC_000009.11	-	99775101
2602770	6.86e-06	4.2e-07	-5.42055	6.01258	-1.02805	NM_139072,AK289553	chr2:230110640-230582911	NC_000002.11	-	230110640
3828162	6.89e-06	4.23e-07	5.41886	6.00559	0.954528	NM_003796,NM_134447,AK226173	chr19:30414561-30507515	NC_000019.9	+	30414561
3396003	6.89e-06	4.22e-07	5.41922	6.00707	0.859531	NM_170601,BC068450	chr11:124504854-124607570	NC_000011.9	-	124504854
3361041	6.89e-06	4.22e-07	5.41914	6.00672	0.806618	NM_000391,AY268890	chr11:6634007-6640660	NC_000011.9	-	6634007
3331433	6.9e-06	4.24e-07	5.41845	6.00386	0.703989	NM_015457,AY894889	chr11:57435477-57468743	NC_000011.9	+	57435477
2899102	6.93e-06	4.25e-07	5.41746	5.99977	1.5825	NM_003531,BC127610	chr6:26045450-26047010	NC_000006.11	+	26045450
3442054	6.94e-06	4.27e-07	5.41667	5.99649	0.730272	NM_001273,NR_003012,BC038596,AK096395	chr12:6679260-6716806	NC_000012.11	-	6679260
2929036	6.97e-06	4.29e-07	5.41578	5.99277	0.85543	NM_032860,BC009855	chr6:144152456-144185453	NC_000006.11	+	144152456
3412345	6.98e-06	4.3e-07	5.41521	5.99039	0.918725	NM_032256,BC060798	chr12:44229706-44783540	NC_000012.11	+	44229706
2908499	7.05e-06	4.35e-07	5.41236	5.97858	0.97214		control		---	0
2352743	7.05e-06	4.35e-07	5.41239	5.97871	0.809615	NM_022836,BC029687	chr1:114447788-114456696	NC_000001.10	+	114447788
3103607	7.1e-06	4.38e-07	5.41076	5.97195	0.790813	NM_018972,NM_001040875,AK292572	chr8:75233389-75401087	NC_000008.10	+	75233389
3730211	7.1e-06	4.39e-07	5.41019	5.96956	0.757856	NM_181725,NM_018396,BC006985,AK302775	chr17:60501256-60527444	NC_000017.10	+	60501256
3337618	7.1e-06	4.39e-07	5.41038	5.97034	0.720169	NM_001164162,NM_001164160,NM_001164161,NM_001164163,NM_018312,NM_001164164,AF264779	chr11:68228209-68416805	NC_000011.9	+	68228209
3095223	7.12e-06	4.4e-07	5.40951	5.96672	1.1442	NM_002164,M34455	chr8:39759910-39797794	NC_000008.10	+	39759910
3840058	7.12e-06	4.41e-07	5.40901	5.96466	0.75507	NM_014225,NR_033500,AK290593	chr19:52693234-52785531	NC_000019.9	+	52693234
2353773	7.12e-06	4.41e-07	5.4093	5.96588	0.718804	NM_003594,AK291017	chr1:117591336-117645489	NC_000001.10	+	117591336
3475545	7.12e-06	4.41e-07	5.40925	5.96565	0.713725	NM_022916,AF439857	chr12:122714118-122751004	NC_000012.11	-	122714118
2413203	7.15e-06	4.43e-07	5.40785	5.95986	0.738553	NM_004631,NM_033300,NM_001018054,NM_017522,D50678	chr1:53709550-53860092	NC_000001.10	-	53709550
3790704	7.17e-06	4.45e-07	5.40685	5.95572	0.895251	NM_021127,D90070	chr18:57567200-57571537	NC_000018.9	+	57567200
2406064	7.17e-06	4.45e-07	5.40682	5.9556	0.779715	NM_005066,BC051192	chr1:35579109-35734307	NC_000001.10	-	35579109
2899171	7.25e-06	4.5e-07	5.40426	5.94497	0.950532	NM_005321,BC096168	chr6:26156559-26157343	NC_000006.11	+	26156559
3029030	7.31e-06	4.55e-07	5.40194	5.93532	0.749174	NM_032982,NM_032983,U13022	chr7:142985402-143004782	NC_000007.13	+	142985402
2908500	7.35e-06	4.58e-07	5.40051	5.92939	1.13615		control		---	0
2950263	7.35e-06	4.57e-07	5.40061	5.9298	0.966128	NM_002118,BC027175,U15085,AY645722,CR407606,AK295872,AK315979,AK301017,AB209577,BC017508	chr6:32902417-32909335	NC_000006.11	-	32902417
3293887	7.4e-06	4.62e-07	5.39853	5.9212	0.736788	NM_015947,AK094170	chr10:73855790-73976866	NC_000010.10	-	73855790
3434384	7.46e-06	4.65e-07	5.39659	5.91314	0.970743		control		---	0
2434609	7.51e-06	4.69e-07	5.39491	5.9062	1.25496	NM_000396,BC016058	chr1:150768583-150780842	NC_000001.10	-	150768583
3765689	7.56e-06	4.72e-07	5.39309	5.89865	0.7083	NM_005121,AF117754,AK123839	chr17:60019968-60143249	NC_000017.10	-	60019968
2549455	7.58e-06	4.74e-07	5.39238	5.89568	0.842278	NR_028102,NM_025264,AF380578	chr2:39963210-40006379	NC_000002.11	-	39963210
3116535	7.6e-06	4.76e-07	5.39158	5.8924	0.732884	NM_016018,NM_032205,NM_198513,AK022280	chr8:133787604-133871286	NC_000008.10	+	133787604
2353477	7.77e-06	4.86e-07	5.38635	5.8707	0.950755	NM_000701,NM_001160233,NM_001160234,BC003077	chr1:116905252-116952863	NC_000001.10	+	116905252
3470286	7.85e-06	4.92e-07	5.38382	5.86022	1.16799		control		---	0
3301556	7.87e-06	4.93e-07	5.38309	5.85722	0.758347	NM_015631,NM_001143973,DQ278872,BC068449,AY359022,AK299141,AK098295,AK128834,BC061582	chr10:97422306-97454702	NC_000010.10	-	97422306
3212300	7.92e-06	4.97e-07	5.38152	5.8507	1.17414		control		---	0
2412668	7.95e-06	5e-07	5.38006	5.84469	0.78877	NM_015913,AK056169	chr1:52485812-52521843	NC_000001.10	-	52485812
3123541	7.95e-06	4.99e-07	5.38038	5.84601	0.718616	NM_004225,AB016816	chr8:8640905-8777688	NC_000008.10	-	8640905
3056414	7.99e-06	5.02e-07	5.3789	5.83987	0.736894	NM_181471,NM_002914,M87338,BC002813,AB451243,BT007058,CR610195	chr7:73645832-73668738	NC_000007.13	-	73645832
2565264	8.05e-06	5.06e-07	5.37694	5.83176	0.879407		control		---	0
3107151	8.08e-06	5.09e-07	5.37595	5.82765	0.941392	BC014598,AK096298	chr8:94619841-94741790	NC_000008.10	+	94619841
2438042	8.08e-06	5.09e-07	5.37559	5.82618	0.644541	NM_015327,BC038296	chr1:156219019-156252630	NC_000001.10	-	156219019
2502300	8.15e-06	5.14e-07	5.37358	5.81785	0.970343	NM_006773,BC024739	chr2:118527364-118607092	NC_000002.11	+	118527364
2426676	8.16e-06	5.16e-07	5.37279	5.8146	0.854355	NM_144584,NM_001102592,BC012198	chr1:109190870-109205953	NC_000001.10	-	109190870
3049292	8.16e-06	5.16e-07	5.37264	5.81396	0.725225	NM_001013398,NM_000598,BC064987	chr7:45951844-45960861	NC_000007.13	-	45951844
3665857	8.16e-06	5.15e-07	5.3731	5.81588	0.61771	NM_005796,BC002348	chr16:67880840-67906467	NC_000016.9	+	67880840
2676671	8.22e-06	5.2e-07	5.37085	5.80657	0.817569	NM_001135055,NM_001064,L12711,AK293438,U55017,BC009970,AK289454,AK303191,AK301231,BC002433,BX649193,AK309482	chr3:53258667-53291391	NC_000003.11	-	53258667
2659577	8.33e-06	5.27e-07	5.36748	5.79265	0.83354	NM_002577,AK291339	chr3:196466748-196559498	NC_000003.11	+	196466748
2448232	8.36e-06	5.3e-07	5.36651	5.78862	0.790688	NM_003292,U69668	chr1:186280804-186344862	NC_000001.10	-	186280804
3626555	8.46e-06	5.36e-07	5.36375	5.77721	0.790442	NM_001110,NR_002927,AF009615,AY956765	chr15:58864222-59042177	NC_000015.9	-	58864222
2727793	8.5e-06	5.39e-07	5.36225	5.77102	0.895313	NM_018475,AK295289	chr4:56257019-56319563	NC_000004.11	+	56257019
3886704	8.54e-06	5.42e-07	5.36092	5.76555	0.804206	NM_006282,BC093768	chr20:43595120-43708627	NC_000020.10	+	43595120
2654023	8.54e-06	5.42e-07	5.36114	5.76642	0.734493	NM_178042,NM_004301,NM_177989,BC036371	chr3:179254587-179320581	NC_000003.11	+	179254587
4015481	8.6e-06	5.47e-07	5.35905	5.75779	1.53686	NM_007052,NM_013955,AF127763,AK292201,AF166327,AF166328,BC075014,BC075015,DQ424904,AF166326,CR617006	chrX:100098334-100129334	NC_000023.10	-	100098334
3999395	8.61e-06	5.48e-07	5.35866	5.75618	0.873466	NM_000381,NM_033289,NM_001193277,NM_033290,NM_001098624,NM_001193278,NM_001193279,NM_001193280,NM_001193281,BC053626	chrX:10400802-10852091	NC_000023.10	-	10400802
2334646	8.62e-06	5.48e-07	5.35839	5.75509	0.753384	NM_003579,NM_001142548,AK292611	chr1:46713380-46745298	NC_000001.10	+	46713380
2536303	8.68e-06	5.53e-07	5.3566	5.74768	1.03775		control		---	0
2403446	8.69e-06	5.54e-07	5.35593	5.74492	0.777084	NM_001164721,NM_001164722,NM_001164723,NM_000952,AK292053	chr1:28475618-28520375	NC_000001.10	-	28475618
2854092	8.71e-06	5.56e-07	-5.35527	5.74221	-1.48792	NM_002310,NM_001127671,X61615	chr5:38479905-38654555	NC_000005.9	-	38479905
2328496	8.74e-06	5.58e-07	5.35431	5.73823	0.919116		control		---	0
2407191	8.78e-06	5.61e-07	5.35313	5.73338	0.86103	NM_013285,BC000107	chr1:38032456-38061533	NC_000001.10	-	38032456
3638188	8.8e-06	5.62e-07	5.35258	5.73107	0.695293	NM_178232,BC062320	chr15:89420540-89438818	NC_000015.9	-	89420540
3301141	8.83e-06	5.65e-07	-5.35157	5.72693	-1.18654	NM_000770,AK303813,X65962	chr10:96796550-96829336	NC_000010.10	-	96796550
2571217	8.86e-06	5.67e-07	5.35056	5.72276	0.716223	NM_032494,AF334161	chr2:112959413-113033629	NC_000002.11	-	112959413
2993727	8.89e-06	5.7e-07	5.34949	5.71834	0.833893	NM_013322,AF121860	chr7:26331515-26417851	NC_000007.13	+	26331515
3212420	8.93e-06	5.73e-07	5.34827	5.7133	0.98184	NM_022127,AK304406	chr9:86887318-87066817	NC_000009.11	-	86887318
2908572	8.93e-06	5.73e-07	5.34834	5.71358	0.743019	NM_001253,AB007892	chr6:44355262-44418645	NC_000006.11	+	44355262
3470404	8.98e-06	5.76e-07	5.34683	5.70735	1.00664		control		---	0
2927967	9e-06	5.78e-07	5.34611	5.70441	1.14946	NM_021243,BC014953	chr6:139335259-139364436	NC_000006.11	+	139335259
3262165	9.01e-06	5.79e-07	5.3456	5.7023	0.728029	NM_006951,BC136348	chr10:105115769-105148817	NC_000010.10	+	105115769
3190659	9.04e-06	5.82e-07	5.34457	5.69805	0.778431	NM_001122821,NM_003011,M93651	chr9:131445954-131458662	NC_000009.11	+	131445954
2580955	9.09e-06	5.85e-07	5.34323	5.69251	0.937306	NM_004688,U32849	chr2:152126988-152146551	NC_000002.11	-	152126988
3885464	9.09e-06	5.86e-07	5.34298	5.69148	0.804647	NM_003286,NR_002719,J03250,BC015320	chr20:39657477-39753121	NC_000020.10	+	39657477
3868841	9.09e-06	5.86e-07	-5.34301	5.69159	-1.16246	NM_001167605,NM_144947,NM_006853,NM_001136032,AB041036	chr19:51525493-51531290	NC_000019.9	-	51525493
3894047	9.11e-06	5.88e-07	5.3421	5.68788	0.801745	NM_018257,NM_001104925,BC032332,BC118988	chr20:62884763-62944485	NC_000020.10	+	62884763
3523855	9.14e-06	5.9e-07	5.3413	5.68456	0.840754	NM_138779,AF070559	chr13:103418340-103426943	NC_000013.10	-	103418340
2429261	9.16e-06	5.92e-07	5.34048	5.68118	0.793343	NM_002524,BC005219	chr1:115247105-115259484	NC_000001.10	-	115247105
3894513	9.16e-06	5.92e-07	5.3405	5.68125	0.758552	NM_018354	chr20:1160959-1193844	NC_000020.10	-	1160959
3540007	9.18e-06	5.94e-07	5.3398	5.67838	0.781654	NM_005956,BC009806	chr14:64854524-64926717	NC_000014.8	+	64854524
3429365	9.19e-06	5.95e-07	5.33946	5.67697	0.870916	NM_003211,BC037557	chr12:104359508-104383489	NC_000012.11	+	104359508
2678526	9.19e-06	5.95e-07	5.3393	5.67632	0.604947	NM_198463,AK124111	chr3:58702854-59267356	NC_000003.11	-	58702854
2835300	9.24e-06	5.99e-07	5.33774	5.6699	0.864394	NM_000112,BC059390	chr5:149340383-149373015	NC_000005.9	+	149340383
3043648	9.29e-06	6.03e-07	5.33626	5.66379	0.926137	NM_019029,NM_031311,BC016838,AY358549,AF106704,AF282617,AK124472,BC028134	chr7:29034849-29343089	NC_000007.13	-	29034849
3243708	9.29e-06	6.03e-07	5.33635	5.66417	0.745934	NM_014753,BC043345	chr10:43277972-43362437	NC_000010.10	+	43277972
2539821	9.31e-06	6.05e-07	5.33553	5.66079	0.868776	NM_003183,GQ402545,BC059410	chr2:9628619-9713186	NC_000002.11	-	9628619
3913483	9.34e-06	6.07e-07	5.33468	5.65727	0.746617	NM_006602,NM_080750,BC046933	chr20:61472216-61524012	NC_000020.10	-	61472216
3716048	9.42e-06	6.13e-07	5.33235	5.64767	0.678014	NM_020791,BC133039	chr17:27717405-27873655	NC_000017.10	+	27717405
2908486	9.44e-06	6.15e-07	5.33151	5.64422	1.0603		control		---	0
3063727	9.44e-06	6.15e-07	5.33158	5.64452	0.565334	NM_005641,NM_139315,NM_001190415,NR_033792,L25444,BC018115,U31659,AK300005,AK097781,BC127819	chr7:99704595-99716951	NC_000007.13	-	99704595
3258260	9.5e-06	6.19e-07	5.33006	5.63825	0.825271	NM_019053,NM_001013848,AK300285,AK293857,BC028395,EF571007,AK128190,AK002113,AK123268,AF220217,BC041403	chr10:94586598-94819239	NC_000010.10	+	94586598
2419432	9.52e-06	6.21e-07	5.32931	5.63517	1.14466	NM_022159,AB032017	chr1:79228211-79506517	NC_000001.10	-	79228211
3733065	9.6e-06	6.27e-07	5.32726	5.6267	0.771895	NM_002758,BC012009	chr17:67339604-67570974	NC_000017.10	+	67339604
3037193	9.63e-06	6.29e-07	5.3264	5.62318	0.871484	NM_014413,NM_001134335,AF255050	chr7:6061888-6098809	NC_000007.13	-	6061888
3489708	9.64e-06	6.3e-07	5.32586	5.62094	0.842826	NR_002605,AJ412062,AK056507	chr13:50656307-51298199	NC_000013.10	+	50656307
3141809	9.7e-06	6.35e-07	5.32419	5.61409	0.900523	NM_014018,BC010150,EF152584	chr8:80830958-80942540	NC_000008.10	-	80830958
3854454	9.7e-06	6.35e-07	5.32403	5.61341	0.834817	NM_004335,BC033873	chr19:17513769-17516457	NC_000019.9	-	17513769
2962767	9.7e-06	6.36e-07	5.32387	5.61277	0.801821	NM_015599,AF102265,AF180371,AK301867,AB032081,BC001258,AK001365,AK225363,AK023709,AK021676,AK023685	chr6:83870889-83900987	NC_000006.11	-	83870889
2828856	9.72e-06	6.38e-07	5.32307	5.60947	0.830137	NM_002154,AB023420	chr5:132387662-132442139	NC_000005.9	+	132387662
3665161	9.72e-06	6.38e-07	5.32321	5.61006	0.671175	NM_025187,NM_033309,BC004556,AY358485	chr16:67143868-67182459	NC_000016.9	+	67143868
2901333	9.73e-06	6.39e-07	5.32276	5.60821	0.783068	NM_170783,NM_014596,AF024616,AF032109	chr6:30026686-30033108	NC_000006.11	+	30026686
3363979	9.74e-06	6.4e-07	5.3223	5.60631	0.791409	NM_148976,NM_002786,NM_001143937,M64992	chr11:14526196-14665163	NC_000011.9	-	14526196
2484457	9.74e-06	6.4e-07	5.32245	5.60693	0.78538	NM_001129993,NM_032506,BC039298	chr2:61293025-61365159	NC_000002.11	+	61293025
3396084	9.92e-06	6.52e-07	-5.31785	5.58801	-1.4264	NM_014312,AY358897,AK301160	chr11:124617371-124622158	NC_000011.9	-	124617371
3382698	9.97e-06	6.57e-07	5.31627	5.58152	0.849216	NR_024042,NM_001128922,NM_005512,BC070079	chr11:76368573-76480940	NC_000011.9	-	76368573
3362719	9.97e-06	6.56e-07	5.31649	5.5824	0.725934	NM_001418,NM_001042559,NM_001172705,NR_004403,BX647799	chr11:10530998-10832170	NC_000011.9	-	10530998
3454680	1e-05	6.62e-07	5.31454	5.57437	0.778511	NM_005653,NM_001173452,NM_001173453,U03494	chr12:51480912-51897269	NC_000012.11	-	51480912
2469529	1.02e-05	6.75e-07	5.30971	5.55452	0.910936	NM_005742,NM_001039362,NM_144583,BC012142	chr2:10849014-10925236	NC_000002.11	+	10849014
2565280	1.02e-05	6.73e-07	5.3106	5.55819	0.674984		control		---	0
3867092	1.03e-05	6.81e-07	5.30767	5.54615	0.86543	NM_006801,BC018778	chr19:48885840-48894851	NC_000019.9	-	48885840
3995371	1.03e-05	6.82e-07	5.30729	5.54459	0.859089	NM_001129765,NM_015922,U47105	chrX:151999511-152048500	NC_000023.10	+	151999511
3764738	1.04e-05	6.93e-07	5.3037	5.52983	0.918579	NM_182620,NM_001100595,NR_029842,BC106003	chr17:57187319-57232858	NC_000017.10	-	57187319
3333711	1.04e-05	6.88e-07	5.30527	5.53628	0.801417	NM_001012661,NM_002394,NM_001012662,NM_001012663,NM_001012664,NM_001013251,BC001061	chr11:62623541-62656296	NC_000011.9	+	62623541
3496916	1.04e-05	6.85e-07	5.30651	5.54138	0.779425	NM_180989,AK289850	chr13:95191458-95281942	NC_000013.10	+	95191458
3101622	1.04e-05	6.87e-07	5.30582	5.53855	0.738001	NM_015169,BC013043	chr8:67339433-67342955	NC_000008.10	+	67339433
3227098	1.04e-05	6.86e-07	5.30607	5.53958	0.631425	NM_000113,AF007871	chr9:132574966-132586464	NC_000009.11	-	132574966
2675763	1.04e-05	6.85e-07	5.30635	5.54071	0.620158	NM_004704,BC001113	chr3:51967448-51976576	NC_000003.11	-	51967448
2951916	1.05e-05	6.99e-07	5.3018	5.52203	0.775475	NM_007271,BC095413	chr6:36461695-36515256	NC_000006.11	-	36461695
3919033	1.06e-05	7.03e-07	5.30021	5.51552	1.04044	NM_006933	chr21:35467498-35469654	NC_000021.8	+	35467498
3107242	1.06e-05	7.04e-07	5.29998	5.51455	0.8433	NM_153704,NM_001142301,NR_024522,BC032835	chr8:94767143-94831452	NC_000008.10	+	94767143
2855614	1.06e-05	7.08e-07	5.29864	5.50907	0.647353	NM_198566,BC036867	chr5:43484683-43515337	NC_000005.9	-	43484683
3261447	1.07e-05	7.09e-07	5.29815	5.50706	0.728757	NM_015062,AF325193	chr10:103892755-103910082	NC_000010.10	+	103892755
2877990	1.07e-05	7.13e-07	5.29683	5.50164	0.641032	NM_198282,AK095896	chr5:138855119-138864658	NC_000005.9	-	138855119
2698844	1.08e-05	7.21e-07	5.29428	5.49116	0.799875	NM_001184,U49844	chr3:142168080-142297689	NC_000003.11	-	142168080
3388914	1.08e-05	7.22e-07	5.29404	5.49018	0.728395	NM_032299,AK298227	chr11:102837118-102980634	NC_000011.9	-	102837118
3294242	1.08e-05	7.19e-07	5.29515	5.49474	0.711796	NM_007265,NM_001135752,NM_001135753,NR_024203,D88208	chr10:74889933-74928405	NC_000010.10	-	74889933
3770390	1.08e-05	7.19e-07	5.29489	5.49369	0.666357	NM_015654,AK123115	chr17:72766688-72772525	NC_000017.10	-	72766688
3980896	1.09e-05	7.27e-07	5.2924	5.48347	1.06486		control		---	0
3942648	1.09e-05	7.28e-07	5.29224	5.4828	0.857495	NR_002323,AK000749	chr22:31365236-31375378	NC_000022.10	+	31365236
3564620	1.09e-05	7.3e-07	5.29147	5.47965	0.854787	NM_007361,AK291652	chr14:52471099-52536557	NC_000014.8	-	52471099
3432138	1.09e-05	7.31e-07	5.29124	5.4787	0.689843	NM_003668,NM_139078,NR_015404,AK122767	chr12:112279782-112350528	NC_000012.11	+	112279782
3799615	1.09e-05	7.32e-07	5.29083	5.47703	0.687455	NM_002828,NM_080422,NM_080423,M25393	chr18:12785485-12885042	NC_000018.9	-	12785485
3527722	1.11e-05	7.43e-07	5.28723	5.46228	1.31362	NM_002934,NR_033909,M28129	chr14:21389887-21424595	NC_000014.8	+	21389887
3434383	1.11e-05	7.46e-07	5.28622	5.45812	0.934296		control		---	0
2908501	1.13e-05	7.62e-07	5.28129	5.4379	0.989527		control		---	0
2737069	1.13e-05	7.62e-07	5.28151	5.43884	0.869923	NM_015143,AK304239,BC030054,CR936632	chr4:99897889-99984588	NC_000004.11	+	99897889
2575134	1.13e-05	7.62e-07	5.28154	5.43893	0.693688	NM_004805,BC017205	chr2:128601127-128617533	NC_000002.11	-	128601127
2899152	1.14e-05	7.65e-07	5.28043	5.4344	0.856225	NM_003512,U90551	chr6:26124373-26140084	NC_000006.11	+	26124373
3147321	1.14e-05	7.71e-07	5.27852	5.42658	0.750273	NM_015902,BC137234	chr8:103264458-103424495	NC_000008.10	-	103264458
2864449	1.15e-05	7.75e-07	5.2775	5.42239	0.826259	NM_001174072,NM_178276,NM_001174071,AF498273,BC101281,AK297467,BC101280,BC101283,BC101282,CR936687	chr5:79407049-79551886	NC_000005.9	-	79407049
3474948	1.15e-05	7.74e-07	5.27782	5.4237	0.821016		control		---	0
3204404	1.15e-05	7.74e-07	5.27782	5.42371	0.789757	NM_007126,BC122550	chr9:35036106-35072648	NC_000009.11	-	35036106
3140763	1.15e-05	7.73e-07	5.27799	5.42439	0.763282	NM_001001481,NM_018299,AY948289	chr8:74688557-74791144	NC_000008.10	-	74688557
3108665	1.16e-05	7.83e-07	5.27502	5.41225	0.764029	NM_001145860,NM_001145861,NM_015029,AK291434	chr8:99129531-99198805	NC_000008.10	+	99129531
3526151	1.16e-05	7.87e-07	5.27395	5.40785	0.756623	NM_006322,BC046634	chr13:113139328-113242481	NC_000013.10	-	113139328
3881686	1.16e-05	7.89e-07	5.27322	5.40485	0.717005	NM_014742,BC021107,AK294980,AK296500,AK316293,AK302439,D87444,AK124411	chr20:30697297-30755694	NC_000020.10	+	30697297
2948547	1.16e-05	7.81e-07	5.27563	5.41473	0.682581	NM_007243,BC039865,AY358411,AK298152,AK075509	chr6:30655829-30659187	NC_000006.11	-	30655829
3988165	1.17e-05	7.95e-07	5.27145	5.39764	1.74326	NM_007231,AF151978	chrX:115362967-115592625	NC_000023.10	+	115362967
3683037	1.17e-05	7.97e-07	5.27072	5.39463	0.8849	NM_015161,BC010281	chr16:18803000-18812897	NC_000016.9	-	18803000
3502710	1.17e-05	7.92e-07	5.27245	5.40171	0.852415	NM_007111,NR_026580,NM_016521,BC011685	chr13:114238807-114302563	NC_000013.10	+	114238807
3377893	1.17e-05	7.98e-07	5.27052	5.39382	0.840112		control		---	0
3377899	1.18e-05	8.04e-07	5.26888	5.38709	0.995925		control		---	0
3590239	1.18e-05	8.03e-07	5.26915	5.38819	0.660279	NM_019074,AB036931	chr15:41221517-41241327	NC_000015.9	+	41221517
3426502	1.19e-05	8.11e-07	5.26673	5.37829	0.826562	NM_005761,AF030339	chr12:94537219-94701443	NC_000012.11	+	94537219
3527514	1.2e-05	8.19e-07	5.26439	5.36873	1.11546	NM_000270,AK126154	chr14:20937558-20946145	NC_000014.8	+	20937558
4011844	1.2e-05	8.21e-07	5.26384	5.36651	1.02904	NM_000206,NM_001025265,NR_033212,AK298656	chrX:70323837-70332311	NC_000023.10	-	70323837
2903285	1.2e-05	8.19e-07	5.26445	5.36898	0.954543	NM_002800,BC065513,CR541656,AK303118,U01025,NR_027771,BX641100,X62741,AK092738,XR_110959,XR_110806	chr6:32811883-32844921	NC_000006.11	+	32811883
2908491	1.22e-05	8.32e-07	5.26081	5.35408	0.860161		control		---	0
2728448	1.22e-05	8.36e-07	5.25969	5.34952	0.845977	NM_000938,BC023503	chr4:57844406-57897756	NC_000004.11	+	57844406
3699787	1.22e-05	8.34e-07	5.26007	5.35106	0.63865		control		---	0
3497790	1.23e-05	8.38e-07	5.25896	5.34654	0.842106	NM_002271,BC045640,BC001497,AK302812,U72761,AK303494,AK125031	chr13:98572093-98688931	NC_000013.10	+	98572093
3369762	1.23e-05	8.39e-07	5.25884	5.34605	0.670679	NM_014186,NM_001101653,BC010892	chr11:36262425-36311032	NC_000011.9	-	36262425
3417371	1.24e-05	8.52e-07	5.25521	5.33121	0.807906	NM_001184796,NM_015292,BC004998	chr12:56522007-56538452	NC_000012.11	+	56522007
3359469	1.24e-05	8.47e-07	5.2565	5.33648	0.633868	NM_005969,NR_002982,U77456	chr11:2959440-3013607	NC_000011.9	-	2959440
3976519	1.25e-05	8.59e-07	5.25312	5.32266	0.81393	NM_006743,BX647914	chrX:48065692-48437284	NC_000023.10	+	48065692
3680610	1.25e-05	8.6e-07	5.25303	5.32229	0.774953	NM_002094,NM_001130006,NM_001130007,BC009503	chr16:11958118-12009907	NC_000016.9	-	11958118
3042973	1.25e-05	8.59e-07	5.25308	5.32251	0.766194	NM_005523,BC040948	chr7:27220796-27224891	NC_000007.13	-	27220796
3390067	1.25e-05	8.55e-07	5.25441	5.32795	0.716739	NM_002519,NM_000051,D83243,X91196	chr11:108027966-108094692	NC_000011.9	-	108027966
3819543	1.25e-05	8.56e-07	5.25391	5.32592	0.715328	NM_005968,NM_031203,BC019580	chr19:8509651-8553993	NC_000019.9	+	8509651
3734379	1.26e-05	8.68e-07	5.25071	5.31284	0.796301	NM_007261,BC032352	chr17:72462532-72480931	NC_000017.10	+	72462532
2461473	1.26e-05	8.63e-07	5.25204	5.31826	0.768036	NM_005646,U38847	chr1:234527129-234614849	NC_000001.10	-	234527129
3392881	1.27e-05	8.79e-07	5.24783	5.30107	0.877417		control		---	0
2928392	1.27e-05	8.78e-07	5.24812	5.30224	0.832229	NM_016485,AF271994	chr6:142436733-142542085	NC_000006.11	+	142436733
2615600	1.27e-05	8.8e-07	5.24763	5.30025	0.752461	NM_178862,AY074880	chr3:31569322-31687279	NC_000003.11	+	31569322
3351531	1.27e-05	8.79e-07	5.24774	5.30072	0.712526	NM_001655,NM_001142281,AK304019	chr11:118436831-118473737	NC_000011.9	+	118436831
3632152	1.27e-05	8.75e-07	5.24874	5.3048	0.707845	NM_000520,BX537989	chr15:72613683-72668760	NC_000015.9	-	72613683
3142217	1.27e-05	8.8e-07	5.24744	5.29946	0.69809	NM_018440,AK289818	chr8:81827648-82144197	NC_000008.10	-	81827648
3986346	1.28e-05	8.85e-07	5.24607	5.29386	0.928625	NM_020384,NM_001171092,NM_001171095,NM_138382,NM_001171706,BC071747,BC105692	chrX:106143394-106174088	NC_000023.10	+	106143394
3419807	1.28e-05	8.84e-07	5.24652	5.2957	0.833098	NM_007235,BC020569	chr12:64798148-64844895	NC_000012.11	+	64798148
3641871	1.28e-05	8.89e-07	5.24498	5.28943	0.826558	NM_001040616,AB083157	chr15:101109258-101142378	NC_000015.9	-	101109258
2409904	1.28e-05	8.87e-07	5.24573	5.29248	0.69744	NM_020365,NM_001166588,AF257077	chr1:45316203-45452296	NC_000001.10	-	45316203
3829160	1.28e-05	8.83e-07	5.24662	5.29613	0.604693	NM_152266,AK128668	chr19:33462745-33469290	NC_000019.9	+	33462745
3249788	1.29e-05	8.92e-07	5.24425	5.28647	0.704287	NM_018237,AF465616	chr10:70116006-70552121	NC_000010.10	+	70116006
2784027	1.3e-05	9.03e-07	5.24144	5.27499	0.897676	NM_001154,M21731	chr4:122475713-122618903	NC_000004.11	-	122475713
2371873	1.32e-05	9.19e-07	5.2374	5.25852	1.02641	NM_031935,AF156100	chr1:185637940-186160081	NC_000001.10	+	185637940
3594825	1.32e-05	9.14e-07	5.2385	5.26301	0.764117	NM_004855,NM_004748,NM_020739,BC017711	chr15:55557059-55660091	NC_000015.9	+	55557059
3565524	1.33e-05	9.24e-07	5.23606	5.25303	0.835001	NM_000161,NM_001024024,NM_001024070,NM_001024071,U66097	chr14:55306202-55369529	NC_000014.8	-	55306202
3929775	1.33e-05	9.29e-07	5.23466	5.24732	0.693927	NM_017613,BC048266,AF232673,AF232674,AF232675,AK001274,DQ656065	chr21:34931848-34961267	NC_000021.8	-	34931848
2921456	1.33e-05	9.27e-07	5.23515	5.24932	0.657498	NM_153369,AK292735	chr6:111580478-111592370	NC_000006.11	+	111580478
3890333	1.34e-05	9.32e-07	5.23388	5.24414	0.969721	NM_003222,BC051829	chr20:55202997-55278161	NC_000020.10	+	55202997
2593352	1.34e-05	9.35e-07	5.23328	5.24171	0.740786	NM_012086,AF133123	chr2:197627759-197664425	NC_000002.11	-	197627759
3212313	1.34e-05	9.39e-07	5.23231	5.23775	0.659534		control		---	0
2456746	1.35e-05	9.45e-07	5.2308	5.23158	0.840087	NM_004446,BC126275	chr1:220141650-220219990	NC_000001.10	-	220141650
4021508	1.36e-05	9.49e-07	5.22981	5.22755	0.79883	NM_017666,BC051728	chrX:129325187-129402873	NC_000023.10	-	129325187
3572235	1.36e-05	9.48e-07	5.22996	5.22816	0.756471	NM_001040108,NM_014381,AF195657	chr14:75480477-75518253	NC_000014.8	-	75480477
3124180	1.37e-05	9.61e-07	5.22669	5.21485	0.698512	NM_017884,AJ344104	chr8:10622475-10697374	NC_000008.10	-	10622475
2591421	1.38e-05	9.7e-07	5.22456	5.20619	0.938942	NM_006287,NM_001032281,AB209866	chr2:188328317-188561116	NC_000002.11	-	188328317
2565286	1.38e-05	9.64e-07	5.22602	5.21213	0.809862		control		---	0
2440612	1.38e-05	9.63e-07	5.22623	5.213	0.597566	NM_012394,AF117237	chr1:161070357-161087874	NC_000001.10	-	161070357
3127775	1.39e-05	9.73e-07	5.22391	5.20354	0.749019	NM_003844,BC012866	chr8:23046318-23082639	NC_000008.10	-	23046318
3662041	1.39e-05	9.76e-07	5.22317	5.20053	0.732608	NM_018233,AB046832	chr16:56485427-56513002	NC_000016.9	+	56485427
3908831	1.39e-05	9.74e-07	5.22351	5.20189	0.715015	NM_021035,AK002139	chr20:47800504-47986656	NC_000020.10	-	47800504
3269280	1.4e-05	9.87e-07	5.22033	5.18896	0.735406	NM_032182,BC008999	chr10:126490399-126525235	NC_000010.10	+	126490399
3233119	1.41e-05	9.91e-07	5.21954	5.18575	1.02881	NM_001818,NM_003739,M33375,BC001479	chr10:5237445-5260908	NC_000010.10	+	5237445
3387033	1.41e-05	9.98e-07	5.21776	5.1785	0.848827	NM_005591,NM_005590,AK095388	chr11:94148754-94227031	NC_000011.9	-	94148754
3761959	1.41e-05	9.89e-07	5.21996	5.18743	0.71048	NM_005827,BC011888,AK293563,D87989,AK296073,AK098056,BX641166,AK124975	chr17:47778305-47786356	NC_000017.10	-	47778305
3203582	1.41e-05	9.93e-07	5.21892	5.18321	0.692879	NM_022917,NM_139235,BC030139	chr9:33452676-33474087	NC_000009.11	-	33452676
3190514	1.41e-05	9.9e-07	5.21977	5.18666	0.651785	NM_001003722,NM_001499,BC030012	chr9:131266978-131304562	NC_000009.11	+	131266978
2675171	1.41e-05	9.95e-07	5.21861	5.18194	0.645388	NM_033158,NM_003773,BC000692,U09577,AF070608,AK127945,AK310963	chr3:50355251-50360221	NC_000003.11	-	50355251
3419585	1.41e-05	9.96e-07	5.21828	5.1806	0.639045	NM_014254,BC013152	chr12:64154129-64203332	NC_000012.11	+	64154129
3570050	1.42e-05	1e-06	5.21706	5.17563	0.962443		control		---	0
2741768	1.42e-05	1e-06	5.21739	5.17698	0.682803	NM_001034194,NM_005033,BX649106	chr4:122722485-122738274	NC_000004.11	+	122722485
3306522	1.43e-05	1.01e-06	5.21456	5.16548	1.13684		control		---	0
3159040	1.43e-05	1.01e-06	5.2149	5.16685	0.751851	NM_000973,NM_033301,BC093064	chr8:146015190-146017811	NC_000008.10	-	146015190
3466318	1.46e-05	1.04e-06	5.20839	5.14039	0.989144	NM_003297,NM_001127362,NM_001032287,NM_018351,BC026074	chr12:95414982-95473463	NC_000012.11	-	95414982
2946364	1.46e-05	1.04e-06	5.20866	5.14146	0.86141	NM_021018,BC096131	chr6:26250379-26251080	NC_000006.11	-	26250379
2458607	1.46e-05	1.03e-06	5.21014	5.14748	0.586945	NM_013328,AK001508	chr1:226107590-226111986	NC_000001.10	-	226107590
3568616	1.47e-05	1.05e-06	5.20653	5.13284	0.793398	NM_198686,BC040679	chr14:65409954-65439478	NC_000014.8	-	65409954
3802924	1.48e-05	1.05e-06	5.20619	5.13143	0.968892	NM_024423,NM_001941,D17427	chr18:28474068-28622806	NC_000018.9	-	28474068
2463515	1.48e-05	1.05e-06	5.20519	5.12738	0.831749	NM_001821,BC117360	chr1:241796180-241799222	NC_000001.10	-	241796180
2844228	1.48e-05	1.06e-06	5.20458	5.12488	0.74071		control		---	0
3751042	1.49e-05	1.06e-06	5.20316	5.11913	0.853838	NM_138463,NM_001160407,BC014072	chr17:27051097-27053930	NC_000017.10	-	27051097
2986493	1.49e-05	1.06e-06	5.20385	5.12191	0.769259	NM_002793,D00761	chr6:170764272-170864476	NC_000006.11	-	170764272
2366490	1.49e-05	1.06e-06	5.20432	5.12385	0.736129	NM_003666,U79751	chr1:169329274-169365506	NC_000001.10	+	169329274
3890154	1.49e-05	1.06e-06	5.20356	5.12073	0.734569	NM_001033522,NM_001324,NM_001033521,AK293182	chr20:54960004-54979850	NC_000020.10	+	54960004
3846238	1.49e-05	1.06e-06	5.20334	5.11987	0.657065	NM_174983,NM_021731,NM_001042680,BC068439	chr19:3538282-3574492	NC_000019.9	-	3538282
4002081	1.49e-05	1.06e-06	-5.20373	5.12145	-1.06181	NM_001168465,NM_152780,NM_001168466,NM_001168467,BC089400	chrX:20024844-20135023	NC_000023.10	-	20024844
3475511	1.5e-05	1.07e-06	5.20127	5.11142	0.771391	NM_019887,NR_024600,NM_138929,NR_024601,AK001399	chr12:122691508-122712010	NC_000012.11	-	122691508
3830961	1.5e-05	1.07e-06	-5.20125	5.11138	-0.879551	NM_001024807,NM_005166,BC012889	chr19:36359421-36370690	NC_000019.9	+	36359421
2988726	1.51e-05	1.08e-06	5.19883	5.10155	0.79523	NM_003088,U03057	chr7:5632449-5666041	NC_000007.13	+	5632449
2362746	1.51e-05	1.08e-06	5.19878	5.10133	0.766507	NM_020125,AF146761,AK096506	chr1:159796540-159807281	NC_000001.10	+	159796540
3274934	1.51e-05	1.08e-06	-5.19983	5.1056	-0.663184	NM_017422,AF172852	chr10:5540662-5541523	NC_000010.10	-	5540662
3811459	1.52e-05	1.09e-06	5.19656	5.09229	0.742785	NM_002035,BC008797	chr18:60995782-61034492	NC_000018.9	-	60995782
3349858	1.53e-05	1.1e-06	5.19583	5.08935	1.13814	NM_006169,BC000234	chr11:114128529-114184258	NC_000011.9	+	114128529
3623683	1.53e-05	1.1e-06	5.19567	5.08869	0.772229	NM_005254,NM_016654,NM_002041,NM_016655,NM_181427,U13045,NR_026891	chr15:50569389-50647502	NC_000015.9	-	50569389
3091628	1.53e-05	1.1e-06	5.19469	5.08472	0.701257	NM_018091,BC001240	chr8:27947759-28074567	NC_000008.10	+	27947759
3405032	1.53e-05	1.09e-06	5.19592	5.0897	0.700175	NM_001987,BC043399	chr12:11754223-12048321	NC_000012.11	+	11754223
3655708	1.53e-05	1.1e-06	5.1952	5.0868	0.640251	NM_024516,BC003640	chr16:29827446-29831424	NC_000016.9	+	29827446
2982381	1.54e-05	1.11e-06	5.19328	5.07899	0.951716	NM_030752,NM_001008897,NR_002960,NR_002965,BC000665	chr6:160199531-160210741	NC_000006.11	-	160199531
2346399	1.54e-05	1.11e-06	5.19355	5.08008	0.853448	NM_001134420,NM_003503,NM_001134419,AB209337	chr1:91876579-92074887	NC_000001.10	+	91876579
3822049	1.54e-05	1.11e-06	5.19236	5.07528	0.718973	NM_004343,M84739	chr19:13049423-13055480	NC_000019.9	+	13049423
2633737	1.57e-05	1.13e-06	5.18865	5.0602	1.34831	NM_032787,BC113451	chr3:100328445-100419603	NC_000003.11	+	100328445
2328808	1.57e-05	1.14e-06	5.18699	5.05347	0.843277	NM_003757,BC003140	chr1:32687991-32697175	NC_000001.10	+	32687991
3620515	1.57e-05	1.13e-06	5.18767	5.05624	0.820724	NM_015497,NM_001110503,AK297816	chr15:42502358-42565732	NC_000015.9	-	42502358
2908489	1.57e-05	1.13e-06	5.18761	5.056	0.796581		control		---	0
3100909	1.57e-05	1.14e-06	5.18683	5.05284	0.743218	NM_152758,BC052970	chr8:64050534-64229735	NC_000008.10	+	64050534
3346412	1.58e-05	1.14e-06	5.18626	5.05052	0.734914	NM_032930,NM_001195005,BC006128,BC054869	chr11:101918132-101955281	NC_000011.9	+	101918132
2823820	1.59e-05	1.15e-06	5.18383	5.04066	0.812936	NM_139281,AF385437	chr5:110427870-110489913	NC_000005.9	+	110427870
3067302	1.6e-05	1.15e-06	5.18325	5.03829	0.818553	NM_002291,M61916	chr7:107564190-107644723	NC_000007.13	-	107564190
2654967	1.61e-05	1.16e-06	5.18169	5.03198	0.86076	NM_032047,BC028058	chr3:182970973-183016282	NC_000003.11	+	182970973
2904248	1.61e-05	1.17e-06	5.18054	5.02733	0.694248	NM_003093,NR_029472,AK223098	chr6:34716046-34741614	NC_000006.11	+	34716046
3000073	1.62e-05	1.17e-06	5.17929	5.02227	0.686444	NM_021130,AK290085	chr7:44836261-44843545	NC_000007.13	+	44836261
3362740	1.62e-05	1.18e-06	5.17836	5.01849	0.615365		control		---	0
3572461	1.64e-05	1.19e-06	5.17565	5.00752	0.728917	NM_007176,AF134159	chr14:76116008-76127532	NC_000014.8	-	76116008
3726992	1.64e-05	1.19e-06	5.17524	5.00586	0.709899	NM_016001,BC025276	chr17:49337082-49375290	NC_000017.10	+	49337082
3243908	1.65e-05	1.2e-06	5.17341	4.99844	0.883277	NM_018590,AB090811	chr10:43633878-43680739	NC_000010.10	+	43633878
3427098	1.65e-05	1.2e-06	5.17455	5.00304	0.821387	NM_005230,BC017371	chr12:96588138-96663594	NC_000012.11	+	96588138
2581548	1.66e-05	1.21e-06	5.17182	4.99199	0.967193	NM_017892,AF049528	chr2:153504168-153575300	NC_000002.11	-	153504168
3413278	1.66e-05	1.21e-06	5.17266	4.99539	0.917256	NM_001143842,NM_024056,NM_001143843,NM_001143841,BC000854	chr12:48334852-48362654	NC_000012.11	+	48334852
2917825	1.66e-05	1.21e-06	-5.17154	4.99086	-1.23553	NM_006581,AB023021	chr6:96463422-96653919	NC_000006.11	+	96463422
3757329	1.67e-05	1.22e-06	5.17085	4.98807	1.14304	NM_002230,NM_021991,M23410,BC011865,AY243535,AK293479	chr17:39908135-39943163	NC_000017.10	-	39908135
3536663	1.67e-05	1.22e-06	5.16983	4.98394	0.83692	NM_144578,BC015621	chr14:55518361-55536902	NC_000014.8	+	55518361
3011861	1.67e-05	1.22e-06	5.1704	4.98623	0.816425	NM_152999,NM_001040665,NM_001040666,AF455138	chr7:89821122-89870130	NC_000007.13	+	89821122
3628994	1.67e-05	1.22e-06	5.1698	4.98382	0.763298	NM_000942,NM_024798,BC008848,AK126655	chr15:64447648-64455522	NC_000015.9	-	64447648
3177563	1.67e-05	1.22e-06	5.17108	4.989	0.748072	NM_024635,AK292239	chr9:88543800-88638385	NC_000009.11	+	88543800
3545466	1.68e-05	1.23e-06	5.16854	4.97872	0.726305	NM_012111,BC000321	chr14:77924236-77935807	NC_000014.8	+	77924236
3855596	1.69e-05	1.24e-06	5.16649	4.9704	0.661974	NM_176880,NM_134440,BC057837	chr19:19312232-19318278	NC_000019.9	-	19312232
2901723	1.7e-05	1.25e-06	5.16522	4.96529	0.959326		control		---	0
3322958	1.7e-05	1.24e-06	5.16596	4.96828	0.865756	NM_019028,NM_001001483,BC036020	chr11:19104621-19198136	NC_000011.9	+	19104621
2522094	1.7e-05	1.25e-06	5.16508	4.9647	0.807396	NM_001100422,NM_015535,NM_001100424,NM_001100423,AY450394,AF193059,AK290496,BC018736,AK300075,AK299223,AK090867,AK092917,BC065817,AK024200,AK097196	chr2:201170790-201345560	NC_000002.11	+	201170790
3362748	1.7e-05	1.25e-06	5.16488	4.96389	0.733072		control		---	0
3757487	1.7e-05	1.25e-06	5.16462	4.96285	0.661978	NM_003315,NR_029431,NM_001144766,BC011837	chr17:40127229-40170520	NC_000017.10	-	40127229
3526378	1.71e-05	1.26e-06	5.16348	4.95822	0.821944	NM_001127202,NM_001127203,NM_018386,BC031246	chr13:113829969-113864798	NC_000013.10	-	113829969
3283991	1.72e-05	1.27e-06	5.16143	4.94995	0.952408	NM_004521,BC126279	chr10:32297792-32345336	NC_000010.10	-	32297792
4026075	1.73e-05	1.27e-06	5.15989	4.9437	1.00999	NM_000808,NR_029521,NR_029522,BC028629	chrX:151297961-151620331	NC_000023.10	-	151297961
2325002	1.73e-05	1.27e-06	5.16003	4.94429	0.73937	NM_001009999,NM_015013,BC040194	chr1:23336334-23410173	NC_000001.10	+	23336334
3260937	1.74e-05	1.28e-06	5.15874	4.93905	0.727773	NM_001163812,NM_021830,NM_001163814,NM_001163813,AF292005	chr10:102747144-102754158	NC_000010.10	+	102747144
3190558	1.77e-05	1.31e-06	5.15415	4.92053	0.765364	NM_001130438,NM_003127,NM_001195532,AB191262	chr9:131314883-131395937	NC_000009.11	+	131314883
2565265	1.77e-05	1.31e-06	5.15361	4.91831	0.744759		control		---	0
2345880	1.78e-05	1.32e-06	5.1523	4.91304	0.785309	NM_001134476,NM_015350,BC030607	chr1:89982645-90063420	NC_000001.10	+	89982645
3275165	1.78e-05	1.32e-06	5.15239	4.91339	0.781168		control		---	0
3443296	1.79e-05	1.33e-06	5.15045	4.90554	0.87034	NM_002355,BC024206	chr12:9092298-9104439	NC_000012.11	-	9092298
3469597	1.79e-05	1.32e-06	5.15067	4.90644	0.773225	NM_014840,BC152462	chr12:106457125-106533811	NC_000012.11	-	106457125
3764103	1.8e-05	1.33e-06	5.14923	4.90065	0.713861	NM_001078166,NR_034041,NM_006924,BC033785,AK126318	chr17:56066413-56084636	NC_000017.10	-	56066413
2672096	1.83e-05	1.35e-06	5.14599	4.88755	0.990178	NM_001295,L10918	chr3:46243208-46278405	NC_000003.11	-	46243208
3470263	1.83e-05	1.36e-06	5.14524	4.88454	0.833024		control		---	0
2544484	1.83e-05	1.35e-06	5.14532	4.88485	0.683108	NM_004036,AF033861	chr2:25042041-25152258	NC_000002.11	-	25042041
2385258	1.83e-05	1.35e-06	5.14567	4.88627	0.656436	NM_001010984,NM_032018,NM_175876,AY358611,BC068478,BC015740,BC035763	chr1:231472860-231505570	NC_000001.10	+	231472860
2703133	1.84e-05	1.36e-06	5.14403	4.87965	0.763036	NM_001190241,NM_020800,NM_001190242,NM_173084,AK303410,BC101494,BC113669,AY159379,BC109259,BC109260,AK291284,AK055904,BX537987,AK025109,BC036596,BC033011	chr3:159944952-160167626	NC_000003.11	-	159944952
2939034	1.86e-05	1.38e-06	5.14049	4.86536	0.827595	NM_004155,BC002538	chr6:2887403-2913243	NC_000006.11	-	2887403
2847967	1.86e-05	1.38e-06	5.14073	4.86633	0.764226	NM_003966,U52840	chr5:9010448-9546177	NC_000005.9	-	9010448
3878533	1.86e-05	1.38e-06	5.14051	4.86543	0.65983	NM_080820,BC045167	chr20:18568386-18744526	NC_000020.10	+	18568386
3726154	1.87e-05	1.39e-06	5.13846	4.85716	0.702224	NM_002204,NM_005501,AB209658	chr17:48133443-48167841	NC_000017.10	+	48133443
2926476	1.87e-05	1.39e-06	5.13918	4.86005	0.615351	NM_004865,AF136570,AL833602	chr6:134273308-134310463	NC_000006.11	+	134273308
2908497	1.88e-05	1.4e-06	5.13766	4.85394	0.790702		control		---	0
3336696	1.88e-05	1.4e-06	5.13683	4.85056	0.659461	NM_012308,NR_027473,BC064360,AK096194	chr11:66886723-67025548	NC_000011.9	+	66886723
2781736	1.89e-05	1.42e-06	5.13477	4.84227	1.02538	NM_000204,AK299232	chr4:110652158-110723296	NC_000004.11	-	110652158
3634071	1.89e-05	1.41e-06	5.13585	4.84664	0.868686	NM_005724,NM_198902,NM_001168412,BC011206	chr15:77336375-77376272	NC_000015.9	-	77336375
2336439	1.89e-05	1.41e-06	5.13543	4.84495	0.84905	NM_015696,AF320068	chr1:53068044-53074719	NC_000001.10	+	53068044
3984779	1.89e-05	1.41e-06	5.13579	4.84639	0.757559	NM_019597,NM_001032393,AK294144	chrX:100663120-100669112	NC_000023.10	+	100663120
3742652	1.89e-05	1.41e-06	5.13508	4.84354	0.709079	NM_002532,AK298158	chr17:5264268-5323480	NC_000017.10	-	5264268
3725815	1.9e-05	1.42e-06	5.13377	4.83823	1.07341		control		---	0
2979704	1.9e-05	1.42e-06	5.13388	4.83868	0.894844	NM_017909,BC106065	chr6:151725918-151773451	NC_000006.11	-	151725918
3454576	1.9e-05	1.42e-06	5.1343	4.84039	0.792512	NM_001174129,NM_001174126,NM_001174127,NM_001174125,NR_033422,NM_000617,NM_001174128,NR_033421,NM_001174130,AF064484	chr12:51373193-51422048	NC_000012.11	-	51373193
2392945	1.9e-05	1.43e-06	-5.13283	4.83447	-0.753983	NR_015440,NR_024371	chr1:2943801-2989737	NC_000001.10	-	2943801
3127610	1.9e-05	1.43e-06	-5.13304	4.83532	-0.760145	NM_144962,BC020779	chr8:22570772-22857540	NC_000008.10	-	22570772
3611625	1.91e-05	1.44e-06	5.13114	4.82763	0.908462	NM_000693,BC069274	chr15:101420038-101456824	NC_000015.9	+	101420038
3191338	1.91e-05	1.44e-06	5.13139	4.82864	0.749454	NM_001136557,NM_001136558,NM_020960,AF308603	chr9:132899261-132900289	NC_000009.11	+	132899261
2385012	1.91e-05	1.44e-06	-5.13158	4.8294	-1.169	NM_006615,NM_016452,AF022799	chr1:230883130-230974883	NC_000001.10	+	230883130
2358360	1.93e-05	1.45e-06	5.12872	4.81789	0.779656	NM_004425,NM_022664,AK097205	chr1:150480518-150486403	NC_000001.10	+	150480518
3380980	1.93e-05	1.45e-06	5.12939	4.82059	0.642711	NM_017907,BC001706	chr11:71796031-71814413	NC_000011.9	-	71796031
2908509	1.94e-05	1.46e-06	5.12761	4.81342	0.769059		control		---	0
2771718	1.97e-05	1.48e-06	5.1239	4.79846	0.780181	NM_018227,AL832015	chr4:68447713-68566877	NC_000004.11	-	68447713
3188697	1.97e-05	1.49e-06	5.12342	4.79652	0.683581	NM_001145001,NM_001166171,NM_014397,NM_001166167,NM_001166168,NM_001166170,NM_001166169,BC000101,BC012761,BC004174,BC004209,AB026289,AK294614,AF087909,CR542222,CR457091,AJ420460,NR_027406,AL832574	chr9:127019896-127138704	NC_000009.11	+	127019896
3892918	1.99e-05	1.5e-06	5.12101	4.78681	0.825696	NM_018270,BC009889	chr20:61427662-61433079	NC_000020.10	+	61427662
2350840	1.99e-05	1.5e-06	5.12164	4.78935	0.791203	NM_006496,M27543	chr1:110091213-110137064	NC_000001.10	+	110091213
3505781	2.01e-05	1.52e-06	5.11809	4.77508	0.868368	NM_006437,AF158255	chr13:24914508-25113783	NC_000013.10	-	24914508
3458837	2.01e-05	1.51e-06	5.11891	4.77837	0.700557	NM_005371,NM_023033,BC000550	chr12:58162256-58166315	NC_000012.11	-	58162256
3630701	2.02e-05	1.53e-06	5.11645	4.76848	0.621025	NM_017882,BC010849	chr15:68499332-68549539	NC_000015.9	-	68499332
2366798	2.03e-05	1.54e-06	5.11547	4.76453	1.03106	NM_006902,NM_022716,AK225968,AK130711	chr1:170606182-170857597	NC_000001.10	+	170606182
3842345	2.03e-05	1.54e-06	5.11511	4.76306	0.61142	NM_007279,NM_001012478,BC030574	chr19:56165522-56186266	NC_000019.9	+	56165522
2731332	2.04e-05	1.54e-06	5.11423	4.75954	1.61676	NM_000584,M17017	chr4:74606243-74622200	NC_000004.11	+	74606243
3692895	2.04e-05	1.55e-06	5.11347	4.75647	0.831916	NM_007006,BX537360	chr16:56461556-56486091	NC_000016.9	-	56461556
3426215	2.05e-05	1.55e-06	5.11256	4.75283	0.847909	NM_014050,NM_172177,NM_172178,BC040240	chr12:93861270-93948820	NC_000012.11	+	93861270
3212310	2.05e-05	1.56e-06	5.112	4.75055	0.726903		control		---	0
4002741	2.07e-05	1.57e-06	5.10965	4.74111	0.780507	NM_001037171,NM_001033583,BX648512	chrX:23684057-23784582	NC_000023.10	-	23684057
3603199	2.08e-05	1.58e-06	5.10827	4.73558	0.965027	NM_005530,U07681	chr15:78441689-78463577	NC_000015.9	+	78441689
3975869	2.08e-05	1.58e-06	5.10817	4.73515	0.830344	NM_006915,BC043348	chrX:46696375-46752657	NC_000023.10	+	46696375
3452970	2.09e-05	1.59e-06	5.10704	4.73063	0.712222	NM_014554,NM_001166686,BC045639	chr12:48436691-48499924	NC_000012.11	-	48436691
3372209	2.09e-05	1.59e-06	5.10767	4.73316	0.687261	NM_002804,BC008713	chr11:47433225-47448078	NC_000011.9	-	47433225
3339230	2.09e-05	1.59e-06	5.10694	4.73022	0.650373	NR_024148,NM_018320,NR_024147,BC009672	chr11:71640108-71708637	NC_000011.9	+	71640108
3212302	2.1e-05	1.6e-06	5.10542	4.7241	0.999692		control		---	0
3568080	2.1e-05	1.6e-06	5.10491	4.72205	0.864503	NM_080666,NM_001008726,BC010698	chr14:64063763-64123918	NC_000014.8	-	64063763
3668898	2.1e-05	1.6e-06	5.10584	4.72581	0.829026	NM_153688,AK296560	chr16:75165152-75206129	NC_000016.9	+	75165152
3387483	2.1e-05	1.6e-06	5.10576	4.72546	0.74683	NR_023356,NM_201278,NM_201281,NM_016156,BC052990	chr11:95566046-95657449	NC_000011.9	-	95566046
3551303	2.11e-05	1.61e-06	5.10361	4.71683	0.657083	NM_001099402,NM_001144995,AB209373	chr14:99947296-99979567	NC_000014.8	+	99947296
3110171	2.12e-05	1.62e-06	5.10292	4.71406	0.90769	NM_001695,BC010960	chr8:104033265-104102624	NC_000008.10	+	104033265
3839142	2.12e-05	1.62e-06	5.10197	4.71025	0.649676	NM_015428,NM_001006656,BC018612	chr19:50528999-50556664	NC_000019.9	+	50528999
3065407	2.12e-05	1.62e-06	-5.10194	4.71013	-0.958829	NM_145032,NM_001111038,BC026121,BC031285,AY359239,AY359238,AK095387,BC020575	chr7:102453318-102715281	NC_000007.13	-	102453318
3378159	2.13e-05	1.63e-06	5.10094	4.70609	0.76562	NM_020470,AK291124	chr11:66051681-66056613	NC_000011.9	-	66051681
2655476	2.13e-05	1.63e-06	5.1008	4.70552	0.756565	NM_004068,NM_001025205,BC014030	chr3:183892635-183901864	NC_000003.11	+	183892635
2545681	2.13e-05	1.63e-06	5.10163	4.70889	0.64117	NM_001521,NM_001035521,BC020981	chr2:27548727-27579868	NC_000002.11	-	27548727
2668021	2.14e-05	1.64e-06	5.09928	4.69942	0.785644	NM_017801,AF479261	chr3:32522814-32544865	NC_000003.11	-	32522814
3214668	2.15e-05	1.65e-06	5.09825	4.69531	0.843435	NM_013417,NM_002161,D28473,U04953,AK293014,BX537417,BX538109,BC065552,AK301272,AK057920,AK127087	chr9:94972509-95056466	NC_000009.11	-	94972509
3286286	2.15e-05	1.65e-06	5.09891	4.69793	0.749657	NM_004966,NM_001098208,NM_001098204,NM_001098206,NM_001098207,NM_001098205,BC016736	chr10:43881065-43904693	NC_000010.10	-	43881065
3750939	2.15e-05	1.65e-06	5.09865	4.69688	0.733284	NM_006923,BC001406	chr17:26975394-26989276	NC_000017.10	-	26975394
3630450	2.15e-05	1.65e-06	5.09816	4.69494	0.682029	NM_024666,BC047026	chr15:67493389-67546999	NC_000015.9	-	67493389
3717052	2.17e-05	1.67e-06	5.09575	4.68527	0.758653	NM_001042492,NM_000267,NM_001128147,M89914	chr17:29421935-29704685	NC_000017.10	+	29421935
2473784	2.18e-05	1.68e-06	5.09414	4.6788	0.943547	NM_033505,NM_153835,BC021229,AY358172,BC015430	chr2:26568982-26618741	NC_000002.11	+	26568982
2593670	2.19e-05	1.68e-06	5.09336	4.67567	0.714154	NM_012433,NM_001005526,AF054284	chr2:198254511-198331082	NC_000002.11	-	198254511
2536350	2.2e-05	1.69e-06	5.09248	4.67212	1.27455		control		---	0
3188993	2.2e-05	1.7e-06	5.09145	4.66799	0.714033	NM_030978,AK056174	chr9:127624419-127640010	NC_000009.11	+	127624419
2609560	2.2e-05	1.69e-06	5.09213	4.67071	0.69911	NM_015453,NM_001114092,BC010421	chr3:9404586-9428518	NC_000003.11	+	9404586
3212324	2.2e-05	1.69e-06	5.09188	4.66972	0.562599		control		---	0
3432678	2.21e-05	1.71e-06	5.09009	4.66253	0.711922	NM_001143819,NM_017901,BC142664	chr12:113658905-113736387	NC_000012.11	+	113658905
3801411	2.24e-05	1.73e-06	5.08715	4.65074	0.812791	NM_000271,AF002020	chr18:21086154-21166449	NC_000018.9	-	21086154
3381965	2.25e-05	1.74e-06	5.08507	4.6424	1.04284	NM_005472,BC113743	chr11:74165886-74178534	NC_000011.9	-	74165886
3555893	2.25e-05	1.74e-06	5.08571	4.64496	0.970884		control		---	0
2408111	2.25e-05	1.74e-06	5.08577	4.6452	0.692783	NM_017646,AF074918,BC128156,AY303390,BC107569,BC128155,AY702933,AY702934,AY702935,AY702936,AY702937,AY702938,AY702939,AY702940,AY702941,AY702942,CR457226,AY702943,AY702944,AY702945,AK296453,AK304759,AY702946	chr1:40283940-40359733	NC_000001.10	-	40283940
3334137	2.27e-05	1.76e-06	5.08263	4.63261	0.633651	NR_003089,NM_017670,AK303228,AK298287,BC107701,BC007519,BC010368,AY177200,AK091830,AK307413	chr11:63753335-63765935	NC_000011.9	+	63753335
3118451	2.27e-05	1.76e-06	5.08271	4.63294	0.625902	NM_017444,NR_023360,BC015891	chr8:141521404-141539067	NC_000008.10	+	141521404
3415969	2.28e-05	1.77e-06	5.08123	4.62702	0.732938	NM_138473,NM_003109,BC062539	chr12:53773909-53810221	NC_000012.11	+	53773909
3773932	2.28e-05	1.77e-06	5.082	4.63008	0.714282	NM_001614,BC009848	chr17:79476861-79491202	NC_000017.10	-	79476861
2487478	2.28e-05	1.77e-06	5.08146	4.62792	0.553106	NM_178439,NR_003281,BC007420,BC024185	chr2:70056672-70108517	NC_000002.11	+	70056672
3804358	2.29e-05	1.77e-06	5.08083	4.62539	0.790795	NM_015476,BC015178	chr18:34359684-34409174	NC_000018.9	-	34359684
3110272	2.3e-05	1.79e-06	5.07895	4.61788	0.80379	NM_003506,NM_001164615,NM_001164616,BC060836	chr8:104310677-104359983	NC_000008.10	+	104310677
2562605	2.31e-05	1.8e-06	5.07789	4.61363	0.647152	NM_015425,AK302458,NR_026984	chr2:86249686-86332998	NC_000002.11	-	86249686
3470283	2.32e-05	1.8e-06	5.07676	4.60909	0.766633		control		---	0
2802398	2.32e-05	1.8e-06	5.07725	4.61107	0.707291	NM_007118,AF091395	chr5:14143590-14532215	NC_000005.9	+	14143590
2525852	2.34e-05	1.82e-06	5.07452	4.6001	0.880972	NM_199229,NM_006916,BC005148	chr2:210867314-210929070	NC_000002.11	+	210867314
3452145	2.36e-05	1.84e-06	5.07235	4.59143	0.776838	NM_004719,AF030234,Y11251,AK026473,AK096682,BC017851,BC020736,AK025132	chr12:46312920-46385893	NC_000012.11	-	46312920
3095815	2.36e-05	1.84e-06	5.07226	4.59107	0.624713	NM_178819,AF406612	chr8:41435719-41481377	NC_000008.10	+	41435719
2702724	2.37e-05	1.85e-06	5.07039	4.58359	1.04283	NM_020169,AF282626	chr3:158363617-158390482	NC_000003.11	-	158363617
2901714	2.37e-05	1.85e-06	5.07097	4.5859	0.944381		control		---	0
3075932	2.37e-05	1.85e-06	5.07104	4.58618	0.6936	NM_022750,BC081541	chr7:139723554-139782849	NC_000007.13	-	139723554
3623031	2.38e-05	1.86e-06	5.06958	4.58034	1.15293	NM_000138,L13923,AK095841	chr15:48701672-48939555	NC_000015.9	-	48701672
2978957	2.38e-05	1.86e-06	5.07006	4.58224	0.609972	NM_007044,AK292090	chr6:149912878-149970088	NC_000006.11	-	149912878
3409127	2.39e-05	1.87e-06	5.06876	4.57705	0.980171	NM_020183,AF256215,AF246960,AF246961,BC125062,AK296706,AF246962,AF231338,BC125061,AF246963,AF231339,AB039921	chr12:27485797-27578222	NC_000012.11	+	27485797
3959722	2.4e-05	1.88e-06	5.0667	4.56882	1.05438		control		---	0
3376867	2.44e-05	1.92e-06	5.06254	4.55216	0.954131	NM_016404,AF110774	chr11:64083978-64085536	NC_000011.9	-	64083978
3773241	2.44e-05	1.91e-06	5.06354	4.55617	0.848099	AL512709	chr17:77909440-77910550	NC_000017.10	-	77909440
2477980	2.44e-05	1.91e-06	5.06339	4.55558	0.799134	NM_024775,BC029584	chr2:38978686-39009608	NC_000002.11	+	38978686
2565149	2.47e-05	1.93e-06	5.06014	4.54256	0.976204		control		---	0
2908494	2.47e-05	1.94e-06	5.05908	4.53833	0.930365		control		---	0
3580179	2.48e-05	1.95e-06	5.05802	4.53408	0.994809	NM_005348,NM_001017963,BC121062	chr14:102547089-102606574	NC_000014.8	-	102547089
2835960	2.48e-05	1.95e-06	5.0586	4.53639	0.724522	NM_005754,NM_198395,BC006997	chr5:151132659-151196282	NC_000005.9	+	151132659
3018509	2.49e-05	1.96e-06	5.05757	4.53229	0.702895	NM_181581,AK297195,BC111774,AK294095,U62767,AK127802,AK308472	chr7:107204430-107218961	NC_000007.13	+	107204430
2406403	2.51e-05	1.97e-06	5.05559	4.52437	0.932014		control		---	0
3332886	2.51e-05	1.97e-06	5.05528	4.52313	0.750003	NM_016464,NR_028473,AK027724	chr11:61129363-61144322	NC_000011.9	+	61129363
3191900	2.52e-05	1.99e-06	5.0535	4.51602	0.641681	NM_005085,D14689	chr9:134000959-134112518	NC_000009.11	+	134000959
3042610	2.53e-05	1.99e-06	5.05321	4.51488	0.917889	NM_003930,BC036044	chr7:26624804-26933531	NC_000007.13	-	26624804
3679503	2.55e-05	2.01e-06	5.05079	4.5052	0.849748	NM_015421,AK093383	chr16:8888688-8891468	NC_000016.9	-	8888688
2406319	2.55e-05	2.01e-06	-5.05069	4.50479	-0.669257		control		---	0
2946319	2.56e-05	2.02e-06	5.04973	4.50096	0.964808	NM_003539,BC128104	chr6:26188942-26189304	NC_000006.11	-	26188942
3751058	2.56e-05	2.02e-06	5.04967	4.50071	0.739629	NM_018182,NM_001077498,AK095569	chr17:27081813-27182230	NC_000017.10	-	27081813
3379452	2.56e-05	2.02e-06	5.04983	4.50137	0.696351	NM_022338,AF264781	chr11:68028807-68042070	NC_000011.9	-	68028807
3163818	2.56e-05	2.02e-06	-5.04948	4.49998	-0.833576	NM_003026,BC032825	chr9:17550950-17797119	NC_000009.11	+	17550950
3989721	2.57e-05	2.03e-06	5.04813	4.49455	0.814866	NM_001042750,NM_001042749,NM_001042751,NM_006603,BC001765,BX641003,BX641002,AK298633,Z75331,CR627425	chrX:123094332-123556398	NC_000023.10	+	123094332
2638789	2.58e-05	2.04e-06	5.04702	4.49015	0.929174	NM_175862,NM_006889,BC040261	chr3:121774221-121839982	NC_000003.11	+	121774221
3203855	2.58e-05	2.05e-06	5.04625	4.48705	0.764208	NM_015397,BC063823	chr9:34086430-34126751	NC_000009.11	-	34086430
3040967	2.58e-05	2.04e-06	5.04739	4.4916	0.717032	NM_012294,D87467	chr7:22151162-22415113	NC_000007.13	-	22151162
3862471	2.58e-05	2.05e-06	5.04622	4.48696	0.571091	NM_001626,M77198,M95936,BC120994,AK294453,BC120995,BC063421,AK304209,AK055779,AK122839,AK098099,AK308906	chr19:40736224-40791282	NC_000019.9	-	40736224
3678542	2.58e-05	2.05e-06	-5.04677	4.48915	-0.987357	NM_152459,NM_001098514,AK075242	chr16:5094135-5116111	NC_000016.9	-	5094135
2948587	2.6e-05	2.06e-06	5.04453	4.4802	0.649238	NM_005803,AF089750,BC001146,BT007077,AK301291,AF117234,CR456946,XR_110976,XR_110798,XR_110977	chr6:30688177-30710511	NC_000006.11	-	30688177
2536398	2.61e-05	2.08e-06	5.04311	4.47455	0.968681		control		---	0
2481142	2.61e-05	2.07e-06	5.04328	4.4752	0.660193	NM_000179,U54777	chr2:47922694-48035053	NC_000002.11	+	47922694
3633460	2.62e-05	2.08e-06	5.04264	4.47267	0.722272	NM_002833,M83738	chr15:75747071-75872026	NC_000015.9	-	75747071
3643396	2.63e-05	2.1e-06	5.0407	4.4649	0.952066	NM_005823,NM_013404,NM_001177355,BC003512	chr16:810776-819155	NC_000016.9	+	810776
3333603	2.63e-05	2.09e-06	5.04155	4.46831	0.645388	NM_173810,BC032123	chr11:62495564-62515272	NC_000011.9	+	62495564
3385951	2.64e-05	2.11e-06	5.03965	4.46071	0.960106	NM_016931,NR_026571,NM_001143837,NM_001143836,AB041035	chr11:89057524-89322769	NC_000011.9	-	89057524
2905069	2.64e-05	2.11e-06	5.03883	4.45746	0.780767	NM_173562,AY305862	chr6:36410371-36458896	NC_000006.11	+	36410371
3309755	2.64e-05	2.11e-06	5.03952	4.4602	0.763019	NM_024834,BC007219	chr10:121578312-121652752	NC_000010.10	-	121578312
3096007	2.64e-05	2.11e-06	5.03978	4.46124	0.751864	NM_001134296,NM_006803,BC056398	chr8:41959059-42029171	NC_000008.10	+	41959059
3474697	2.64e-05	2.1e-06	5.03989	4.46169	0.75	NM_139015,BC073910,AK291161,BC025781,AB252457,AY169313,BC101625,BC101627,AY358767,AK097149,BC011943	chr12:121199557-121342157	NC_000012.11	-	121199557
3873699	2.64e-05	2.11e-06	5.03964	4.4607	0.660163	NM_080836,BC017340	chr20:2082257-2157684	NC_000020.10	+	2082257
2991233	2.65e-05	2.12e-06	5.03785	4.45356	0.809967	NM_001621,L19872	chr7:17338246-17397204	NC_000007.13	+	17338246
3460127	2.65e-05	2.13e-06	5.03735	4.45154	0.797881	NM_002076,BX537363	chr12:65100243-65153212	NC_000012.11	-	65100243
3502497	2.65e-05	2.12e-06	5.03827	4.45521	0.780186	NM_001008895,NM_003589,AF077188	chr13:113857834-113919355	NC_000013.10	+	113857834
3458133	2.65e-05	2.12e-06	5.03796	4.45399	0.770727	NM_000946,BC005266	chr12:57124159-57146148	NC_000012.11	-	57124159
3238962	2.65e-05	2.13e-06	5.03752	4.45225	0.630548	NM_019590,NM_001098500,NM_001098501,NR_023388,BX640796	chr10:23983666-24861204	NC_000010.10	+	23983666
2815791	2.66e-05	2.13e-06	5.03679	4.44932	0.828085	NM_000521,AF378118	chr5:73931178-74018447	NC_000005.9	+	73931178
2877378	2.66e-05	2.13e-06	5.03648	4.44807	0.813001	NM_001790,NM_022809,AK097710	chr5:137620966-137674027	NC_000005.9	-	137620966
3405531	2.66e-05	2.14e-06	5.03598	4.44611	0.781574	NM_016355,NM_201224,AL833469	chr12:12965195-12982909	NC_000012.11	+	12965195
3303300	2.66e-05	2.13e-06	5.03646	4.44801	0.755361	NM_001278,AB209028	chr10:101948125-101989355	NC_000010.10	-	101948125
3679564	2.66e-05	2.14e-06	5.03578	4.4453	0.687044	NM_003470,AK302912	chr16:8985957-9057331	NC_000016.9	-	8985957
2633691	2.68e-05	2.15e-06	5.03419	4.43897	1.03428	NM_018004,BC040355	chr3:100211446-100297959	NC_000003.11	+	100211446
2873897	2.68e-05	2.16e-06	5.03355	4.43641	0.727439	NM_178450,BC047569	chr5:126203412-126367376	NC_000005.9	-	126203412
3544387	2.68e-05	2.16e-06	5.03346	4.43606	0.685323	NM_014239,BC003165	chr14:75432462-75476745	NC_000014.8	+	75432462
3930360	2.68e-05	2.16e-06	5.03326	4.43523	0.632676	NM_001001890,NM_001754,NM_001122607,D43968	chr21:36160108-36421641	NC_000021.8	-	36160108
3331392	2.68e-05	2.16e-06	5.03395	4.43801	0.616141	NM_006831,NM_001142597,U73524	chr11:57406852-57429331	NC_000011.9	+	57406852
3406880	2.68e-05	2.16e-06	-5.03414	4.43877	-1.34158	NM_004570,BC144134	chr12:18410306-18842708	NC_000012.11	+	18410306
3286343	2.69e-05	2.18e-06	5.03151	4.42826	0.76634	NM_001099282,NM_005674,NM_001099284,NM_001099283,BC026030	chr10:44051795-44070025	NC_000010.10	-	44051795
2622638	2.69e-05	2.17e-06	5.03285	4.4336	0.713698	NM_002070,NM_001166425,BC012138,BC016995,BC014627,CR456783,AF493906,J03004,AK302330,AK304473,AY677118,AK131062,AK096595,AK126708,L17326	chr3:50263734-50296777	NC_000003.11	+	50263734
2476116	2.69e-05	2.17e-06	5.03229	4.43137	0.69133	NM_001193513,NM_017964,NM_001193514,NM_001193515,BC066903,AK304225,EF560726,EF560719,BC032525	chr2:32390747-32449684	NC_000002.11	+	32390747
3883787	2.69e-05	2.17e-06	5.03245	4.43201	0.679643	BC019311,BC001751,AF132957,AK026967	chr20:34824243-34858820	NC_000020.10	+	34824243
3472312	2.69e-05	2.17e-06	5.03206	4.43048	0.668041	NM_024959,BC098360	chr12:113736586-113776093	NC_000012.11	-	113736586
2594951	2.7e-05	2.19e-06	5.03079	4.42541	0.845897	NM_001044385,NM_152388,AB053301,AK303954,BC029611,AK304395,AK125841,BC013730,AF212043	chr2:202484911-202508273	NC_000002.11	-	202484911
3817501	2.7e-05	2.18e-06	5.03109	4.42661	0.57812	NM_005483,BC067093	chr19:4402661-4444995	NC_000019.9	+	4402661
2961647	2.7e-05	2.19e-06	-5.03072	4.42514	-0.785228	NM_000863,M81590	chr6:78171922-78209815	NC_000006.11	-	78171922
3294438	2.71e-05	2.19e-06	5.02977	4.42133	0.837265	NM_004034,NM_001156,AK295319	chr10:75134879-75173814	NC_000010.10	-	75134879
2971378	2.72e-05	2.21e-06	5.0283	4.41547	0.714393	NM_020399,NM_001017408,AY033606,X51619	chr6:117881449-117923691	NC_000006.11	-	117881449
3259836	2.72e-05	2.2e-06	5.02877	4.41737	0.699462	NM_198046,NM_032327,NM_198043,NM_198044,NM_198045,BC011749	chr10:99205930-99217120	NC_000010.10	+	99205930
3275258	2.73e-05	2.22e-06	5.02704	4.41044	1.28815		control		---	0
3519309	2.74e-05	2.23e-06	5.02626	4.40735	0.880255	NM_005842,BX648582	chr13:80785809-80915917	NC_000013.10	-	80785809
2960872	2.75e-05	2.24e-06	5.02495	4.40212	0.714453	NM_138441,AK097148	chr6:74123238-74161999	NC_000006.11	-	74123238
3750625	2.75e-05	2.24e-06	5.02501	4.40235	0.697138	NM_015584,NM_021137,BC009265	chr17:26672253-26684583	NC_000017.10	-	26672253
2573786	2.75e-05	2.23e-06	5.02564	4.40487	0.655696	NM_032390,BC024238	chr2:122416019-122514582	NC_000002.11	-	122416019
3903889	2.75e-05	2.23e-06	5.02571	4.40515	0.631053	NM_018244,NM_199487,NM_001184977,AY050659,BC122862,BC119013,BC105791,AK295379,AY050660,AK293516,AK300130,AK302133,AK293149,AK022742,AK128252,BX537568,AK308819	chr20:33890282-33999966	NC_000020.10	-	33890282
3634811	2.76e-05	2.26e-06	5.02265	4.39298	0.898206	NM_004390,BC002479	chr15:79190155-79241896	NC_000015.9	-	79190155
2911413	2.76e-05	2.25e-06	5.02344	4.3961	0.844156	NM_000947,BC064931,AK291915,BC017833,AK223287	chr6:57086416-57513375	NC_000006.11	+	57086416
3151883	2.76e-05	2.25e-06	5.0235	4.39635	0.828003	NM_194291,BC041379	chr8:125323179-125438671	NC_000008.10	-	125323179
3679533	2.76e-05	2.26e-06	5.02275	4.39337	0.783052	NM_001042476,NM_014316,BC108283	chr16:8946832-8962856	NC_000016.9	-	8946832
4012142	2.76e-05	2.25e-06	5.02405	4.39855	0.775088	NM_017669,AK056494	chrX:71424520-71458867	NC_000023.10	-	71424520
3336486	2.76e-05	2.25e-06	5.02407	4.39863	0.734964	NM_024650,BC028240,AL713740	chr11:66512217-66610786	NC_000011.9	+	66512217
3212976	2.76e-05	2.26e-06	5.02312	4.39484	0.651501	NM_024617,NM_001185059,NM_001185074,BC032456,BX641077,AK058021,BC016387,AK094169,BC111003,CR620723,AK308352	chr9:88902649-88969985	NC_000009.11	-	88902649
3761632	2.76e-05	2.25e-06	5.02365	4.39697	0.585982	NM_007241,BC008976	chr17:47005592-47022173	NC_000017.10	-	47005592
3865275	2.76e-05	2.25e-06	-5.0237	4.39714	-0.934898	NM_001824,BC007462	chr19:45809674-45831796	NC_000019.9	-	45809674
3888522	2.77e-05	2.26e-06	5.02229	4.39155	0.856007	NM_005985,AF125377	chr20:48587290-48605418	NC_000020.10	+	48587290
2659039	2.77e-05	2.28e-06	5.02102	4.38649	0.774818	NM_001098516,NM_152673,NR_003265,NR_003264,BC029267,AF088032,BC062438	chr3:195381969-195467991	NC_000003.11	+	195381969
3371673	2.77e-05	2.27e-06	5.02203	4.39049	0.766316	NM_004308,BC018118	chr11:46698645-46722224	NC_000011.9	-	46698645
3260001	2.77e-05	2.28e-06	5.021	4.38639	0.736963	NM_031484,NR_026754,AK027093	chr10:99446575-99484681	NC_000010.10	+	99446575
3868659	2.77e-05	2.27e-06	5.02156	4.38864	0.692286	NM_199249,NM_199250,NR_003068,NR_003069,BC051842	chr19:51300962-51320784	NC_000019.9	-	51300962
2902348	2.78e-05	2.28e-06	5.02069	4.38518	0.778851	NM_005931,AK291927,BC044218,AK300791,AK303655,AY885251	chr6:31462671-31496238	NC_000006.11	+	31462671
3013952	2.79e-05	2.29e-06	5.01962	4.38093	0.933315	NM_020186,BC028409	chr7:96721942-96974660	NC_000007.13	+	96721942
3284882	2.79e-05	2.29e-06	5.0197	4.38123	0.776733	NM_003591,BC110901	chr10:35297468-35434392	NC_000010.10	-	35297468
3699767	2.81e-05	2.31e-06	5.0176	4.37287	0.825513		control		---	0
3015216	2.81e-05	2.32e-06	5.01651	4.36855	0.762491	NM_006833,BC002520	chr7:99686583-99689983	NC_000007.13	+	99686583
3274173	2.81e-05	2.31e-06	5.0173	4.37168	0.701266	NM_014889,BX649017	chr10:3175147-3451637	NC_000010.10	-	3175147
3041875	2.81e-05	2.32e-06	5.0169	4.37008	0.692393	NM_015550,NM_145320,NM_145321,NM_145322,AF392444	chr7:24836022-25071479	NC_000007.13	-	24836022
3157385	2.81e-05	2.31e-06	5.01745	4.37226	0.659526	NM_052963,AF349017	chr8:144389157-144427470	NC_000008.10	-	144389157
3472366	2.82e-05	2.33e-06	5.01548	4.36443	0.913041	NM_006843,AK292760	chr12:113830252-113841692	NC_000012.11	-	113830252
2522439	2.83e-05	2.34e-06	5.01443	4.36026	1.05215	NM_014670,AL833518	chr2:201676211-201710141	NC_000002.11	+	201676211
3275145	2.83e-05	2.34e-06	5.01449	4.36049	1.04664		control		---	0
3462949	2.83e-05	2.34e-06	5.01423	4.35949	0.785103	NM_020841,NM_001003712,AF392452	chr12:76745119-76953589	NC_000012.11	-	76745119
2727913	2.83e-05	2.33e-06	5.01512	4.36303	0.712812	NM_001024924,NM_018261,NM_178237,BC094751	chr4:56719830-56771224	NC_000004.11	+	56719830
2877314	2.83e-05	2.34e-06	5.01471	4.36139	0.654992	NM_004661,AF053977	chr5:137520999-137548983	NC_000005.9	-	137520999
3354210	2.84e-05	2.35e-06	5.0132	4.35536	0.846797	NM_017425,AF334735,AF300796	chr11:124543782-124595597	NC_000011.9	+	124543782
2976360	2.86e-05	2.37e-06	5.01153	4.34875	1.06764	NM_022121,AF317550	chr6:138361108-138428648	NC_000006.11	-	138361108
2522212	2.86e-05	2.37e-06	5.01116	4.34724	0.783728	NM_152524,NM_001160033,NM_001160046,BC092412	chr2:201374751-201448805	NC_000002.11	+	201374751
3881282	2.86e-05	2.37e-06	5.01116	4.34727	0.668267	NM_178580,NM_178581,NM_030789,NM_178582,NR_003677,DQ168450	chr20:30084832-30159770	NC_000020.10	+	30084832
3248999	2.88e-05	2.39e-06	5.00927	4.33972	0.72678	NM_001001330,BC068557	chr10:65279418-65390894	NC_000010.10	+	65279418
3573261	2.88e-05	2.39e-06	5.00897	4.33853	0.655389	NM_012245,AK316087	chr14:78183950-78267015	NC_000014.8	-	78183950
3969358	2.9e-05	2.41e-06	5.00724	4.33169	0.796507	NM_015507,NM_001167890,AF186084	chrX:13587724-13651765	NC_000023.10	+	13587724
3962338	2.9e-05	2.41e-06	5.00727	4.33181	0.616788	NM_005650,NM_181492	chr22:42556084-42679970	NC_000022.10	-	42556084
2565153	2.9e-05	2.41e-06	5.00745	4.33251	0.599172		control		---	0
2974413	2.91e-05	2.42e-06	5.00602	4.32684	0.916228	NM_015529,AY007239	chr6:132568464-132722672	NC_000006.11	-	132568464
3025433	2.91e-05	2.42e-06	-5.00626	4.3278	-2.21614	NM_001080538,NM_020299,BC008837,BC072676	chr7:134212344-134287601	NC_000007.13	+	134212344
3318639	2.92e-05	2.43e-06	-5.00518	4.3235	-0.881242	NM_176875,AF239668	chr11:6280966-6293509	NC_000011.9	+	6280966
3190061	2.94e-05	2.45e-06	5.0033	4.31604	0.593884	NM_004957,NM_001018078,BC064393	chr9:130556361-130576715	NC_000009.11	+	130556361
2844311	2.95e-05	2.46e-06	5.00193	4.3106	0.810254		control		---	0
3111530	2.95e-05	2.46e-06	5.00223	4.31178	0.765651	NR_036472,NM_020189,NR_036471,NM_001193557,AK290752	chr8:110342252-110358179	NC_000008.10	+	110342252
3887049	2.95e-05	2.46e-06	5.00244	4.31262	0.689541	NM_181802,NM_007019,NM_181799,NM_181800,NM_181801,NM_181803,BC032677	chr20:44441255-44445587	NC_000020.10	+	44441255
2952679	2.95e-05	2.46e-06	5.00256	4.31307	0.679431	NM_006708,BC011365	chr6:38643734-38670927	NC_000006.11	-	38643734
3183111	2.96e-05	2.48e-06	5.00039	4.30446	0.788703	NM_080546,BC049203	chr9:108006901-108201439	NC_000009.11	+	108006901
3301609	2.96e-05	2.48e-06	5.00033	4.30421	0.782253	AK091396,BC028619,AK096469,AK000974,BC003519	chr10:97512973-97850078	NC_000010.10	-	97512973
3532393	2.96e-05	2.47e-06	5.00087	4.30638	0.742203	NM_014672,AB002389	chr14:35590557-35747750	NC_000014.8	+	35590557
3096214	2.96e-05	2.47e-06	5.00134	4.30822	0.702302	NM_001135694,NM_005662,BC056870	chr8:42249151-42263638	NC_000008.10	+	42249151
3743906	2.97e-05	2.48e-06	4.99993	4.30262	0.754591	NM_000546,NM_001126112,NM_001126114,NM_001126113,NM_001126115,NM_001126116,NM_001126117,AB082923	chr17:7570682-7591142	NC_000017.10	-	7570682
2791419	3e-05	2.52e-06	4.99685	4.29042	1.17366	NM_001128424,NM_016613,NM_001031700,BC043193	chr4:159045646-159094192	NC_000004.11	-	159045646
3563922	3.02e-05	2.53e-06	4.99536	4.28449	0.750884	NM_198794,NM_006575,BC036013	chr14:50884815-51027824	NC_000014.8	-	50884815
3470289	3.03e-05	2.54e-06	4.99424	4.28004	0.721755		control		---	0
2358171	3.04e-05	2.55e-06	4.99321	4.27595	0.682664	NM_004698,AF016370	chr1:150293959-150325697	NC_000001.10	+	150293959
3851072	3.05e-05	2.56e-06	4.99269	4.2739	0.801593	NM_001111035,NM_001111034,NM_001111036,NM_001611,BC111014	chr19:11685477-11689781	NC_000019.9	-	11685477
3210130	3.05e-05	2.56e-06	4.99282	4.27442	0.691984	BC034033,AK299691,BX647386,BC043649	chr9:77595730-77643467	NC_000009.11	-	77595730
3996755	3.07e-05	2.58e-06	4.99093	4.2669	0.851423	NM_024332,NM_001018055,BC006540	chrX:154299730-154351340	NC_000023.10	+	154299730
3212330	3.07e-05	2.57e-06	4.99122	4.26808	0.56275		control		---	0
4026263	3.09e-05	2.6e-06	4.98859	4.25764	0.903645	NM_004344,BC013873	chrX:151995537-151999306	NC_000023.10	-	151995537
3617830	3.09e-05	2.6e-06	4.98874	4.25823	0.736728	NM_014106,BC071603	chr15:35270547-35314146	NC_000015.9	-	35270547
3757630	3.12e-05	2.63e-06	4.98614	4.24793	0.627233	NM_021078,BC039907	chr17:40265159-40273363	NC_000017.10	-	40265159
3707759	3.14e-05	2.64e-06	4.98472	4.2423	0.75286	NM_024039,AK289939	chr17:5389726-5394129	NC_000017.10	+	5389726
2946268	3.15e-05	2.65e-06	4.98419	4.24021	1.01888	NM_003526,BC105595	chr6:26113278-26124248	NC_000006.11	-	26113278
2946208	3.15e-05	2.65e-06	4.98397	4.23931	0.749246	NM_003544,BC069467	chr6:26027054-26027537	NC_000006.11	-	26027054
4006504	3.17e-05	2.68e-06	4.98146	4.22939	0.80509	NM_176819,NM_024689,AK294472	chrX:45007623-45208527	NC_000023.10	-	45007623
2320060	3.17e-05	2.68e-06	4.98131	4.22876	0.753967		control		---	0
2565163	3.17e-05	2.67e-06	4.98229	4.23268	0.668848		control		---	0
2655688	3.17e-05	2.68e-06	4.98167	4.23022	0.617694	NM_182917,NM_198241,NM_001194946,NM_001194947,NM_198244,NM_198242,NM_004953,AB210013	chr3:184032276-184053135	NC_000003.11	+	184032276
3848039	3.19e-05	2.69e-06	4.98032	4.22487	1.18095	NM_000064,BC150179	chr19:6677657-6723756	NC_000019.9	-	6677657
3041816	3.19e-05	2.69e-06	4.9802	4.22437	0.797809	NM_004403,NM_001127454,NM_001127453,AK094714	chr7:24737645-24832466	NC_000007.13	-	24737645
3594066	3.2e-05	2.71e-06	4.97866	4.2183	0.724333	NM_014547,BC020542	chr15:52121795-52239492	NC_000015.9	+	52121795
2464499	3.21e-05	2.72e-06	4.97816	4.21629	0.619344	NM_031844,NM_004501,BC003367,AF068846,BC015782,BC024767,AK297119,BC003621,AF461014,CR608250	chr1:245012090-245027952	NC_000001.10	-	245012090
2361584	3.22e-05	2.72e-06	4.97753	4.2138	0.739465	NM_144772,AK298222	chr1:156561559-156564089	NC_000001.10	+	156561559
3596109	3.23e-05	2.73e-06	4.97666	4.21035	0.823706	NM_152450,BC022537	chr15:59730227-59845340	NC_000015.9	+	59730227
3426917	3.25e-05	2.76e-06	4.97458	4.20211	0.834668	NM_006838,AK125296	chr12:95867306-96172311	NC_000012.11	+	95867306
3817698	3.25e-05	2.75e-06	4.97501	4.20382	0.730566	NM_001048201,NM_013282,AB177624	chr19:4909220-4962161	NC_000019.9	+	4909220
3432641	3.25e-05	2.76e-06	4.97479	4.20295	0.596715	BC022092,AY007158	chr12:113623375-113630160	NC_000012.11	+	113623375
3903525	3.27e-05	2.78e-06	4.97273	4.19478	0.639391	NM_014071,AF208227	chr20:33284722-33413452	NC_000020.10	-	33284722
2594089	3.28e-05	2.79e-06	4.97219	4.19265	0.681401	NM_001172509,NM_015265,NM_001172517,AK291463	chr2:200060800-200326753	NC_000002.11	-	200060800
3819602	3.29e-05	2.8e-06	4.97071	4.18681	1.20815		control		---	0
3452818	3.29e-05	2.79e-06	4.97144	4.1897	0.752049	NM_001017535,NM_000376,BC060832	chr12:48235329-48320556	NC_000012.11	-	48235329
3504791	3.31e-05	2.82e-06	4.96898	4.17998	0.844483	NM_152726,BC031089	chr13:22066836-22178353	NC_000013.10	-	22066836
2519756	3.31e-05	2.82e-06	4.96914	4.18059	0.842991	NM_032168,BC040567	chr2:190305682-190340264	NC_000002.11	+	190305682
3886867	3.31e-05	2.82e-06	4.9696	4.18241	0.734881	NM_001048226,NM_001048225,NM_018478,NM_001048222,NM_001048224,NM_001048221,NM_001048223,NM_001197140,NM_001197139,NR_003189,AF220191	chr20:44034691-44039233	NC_000020.10	+	44034691
3780287	3.32e-05	2.83e-06	4.96837	4.17756	0.769996	NM_003799,AF067791	chr18:13726335-13821708	NC_000018.9	+	13726335
3375935	3.32e-05	2.84e-06	4.96775	4.1751	0.707693	NM_012200,AK075166	chr11:62382779-62389616	NC_000011.9	-	62382779
2337003	3.32e-05	2.84e-06	4.96763	4.17461	0.643727	NM_016491,AK024572	chr1:54649734-54692672	NC_000001.10	+	54649734
2843619	3.33e-05	2.85e-06	4.96686	4.17156	0.725778	NM_031266,NM_004499,AK054600	chr5:177631518-177638158	NC_000005.9	+	177631518
2600037	3.35e-05	2.86e-06	4.96574	4.16715	0.67888	NM_024506,AY358639	chr2:220100184-220110185	NC_000002.11	-	220100184
2844222	3.36e-05	2.88e-06	4.96426	4.1613	0.779394		control		---	0
2528020	3.36e-05	2.88e-06	4.96433	4.16156	0.707815	NM_014640,AK291770	chr2:219575570-219624666	NC_000002.11	+	219575570
4010860	3.36e-05	2.88e-06	4.96441	4.16191	0.615752	NM_031206,NM_001170649,NM_001170650,AK074087	chrX:64731681-64767523	NC_000023.10	-	64731681
3390852	3.36e-05	2.88e-06	-4.96408	4.16056	-1.01364	NR_034154,AK127703	chr11:111164112-111176175	NC_000011.9	-	111164112
3362757	3.38e-05	2.9e-06	4.96265	4.15494	0.925361		control		---	0
3819568	3.38e-05	2.9e-06	4.9625	4.15433	0.820921		control		---	0
3138414	3.38e-05	2.9e-06	4.96217	4.15301	0.703631	NM_018120,BC011607	chr8:66479699-66546436	NC_000008.10	-	66479699
3852691	3.4e-05	2.92e-06	4.96104	4.14858	0.621857	NM_005804,U90426	chr19:14519562-14543078	NC_000019.9	-	14519562
2361731	3.4e-05	2.92e-06	4.96098	4.14832	0.532821	NM_005973,BC010450	chr1:156720469-156770577	NC_000001.10	+	156720469
2841964	3.41e-05	2.93e-06	4.95981	4.14368	0.911547	NM_002449,NR_002307,D89377	chr5:174151289-174157876	NC_000005.9	+	174151289
3536905	3.42e-05	2.94e-06	4.959	4.14051	0.832221	NM_182926,NM_001079521,NM_001079522,NM_004986,AY264265	chr14:56025810-56192562	NC_000014.8	+	56025810
2763805	3.42e-05	2.94e-06	4.95938	4.14201	0.694701	NM_001358,NR_030299,BC035974	chr4:24519061-24641842	NC_000004.11	-	24519061
3676689	3.44e-05	2.96e-06	4.9571	4.13298	0.771882		control		---	0
3557048	3.44e-05	2.96e-06	4.95714	4.13313	0.699706	NM_001144932,NM_002797,NM_001130725,AK300714	chr14:23485772-23504417	NC_000014.8	-	23485772
3212331	3.45e-05	2.97e-06	4.95676	4.13164	0.833719		control		---	0
2374982	3.47e-05	3e-06	4.95438	4.12224	0.712439	NM_020216,BC012166	chr1:201951520-201975685	NC_000001.10	+	201951520
3772775	3.47e-05	2.99e-06	4.95517	4.12537	0.661749	NM_138793,NM_001159772,NM_001159773,BC017655	chr17:76987808-77006149	NC_000017.10	-	76987808
3072546	3.47e-05	2.99e-06	4.95505	4.12491	0.652744	NM_018718,AF429308	chr7:130033612-130093431	NC_000007.13	-	130033612
3381063	3.47e-05	2.99e-06	4.95468	4.12342	0.64628	NM_030813,BC006404	chr11:71962014-72145689	NC_000011.9	-	71962014
3076868	3.48e-05	3.01e-06	4.9532	4.11759	1.16481	NM_013252,AK292766	chr7:141627157-141652436	NC_000007.13	-	141627157
2477438	3.48e-05	3.01e-06	4.95331	4.11803	0.931388	NM_012413,BC047756	chr2:37569990-37643216	NC_000002.11	+	37569990
3454821	3.48e-05	3.01e-06	4.95316	4.11743	0.886117	NM_001033873,NM_001031628,BC045658	chr12:51638355-51664664	NC_000012.11	-	51638355
3721452	3.5e-05	3.03e-06	4.95166	4.11153	0.87623	NM_021939,AK092042	chr17:39968972-39979423	NC_000017.10	+	39968972
3893072	3.5e-05	3.03e-06	4.95205	4.11305	0.811044	NM_017896,BC032120	chr20:61569236-61580125	NC_000020.10	+	61569236
3996381	3.5e-05	3.02e-06	4.95221	4.11367	0.710133	NM_001183,AK090462	chrX:153657001-153664848	NC_000023.10	+	153657001
3838067	3.5e-05	3.03e-06	4.95189	4.11242	0.639008	NR_027882,NM_138761,NM_138764,NM_004324,NM_138763,BC014175	chr19:49457570-49465052	NC_000019.9	+	49457570
2434971	3.52e-05	3.05e-06	4.94993	4.10466	0.723741	NM_000449,NM_001025603,BC017471,AK302891,AK309072,AK311525	chr1:151312258-151319749	NC_000001.10	-	151312258
3392885	3.53e-05	3.06e-06	4.94904	4.10115	0.758404		control		---	0
3583638	3.53e-05	3.06e-06	4.94905	4.10121	0.707927	NM_014608,NM_001033028,AY763577	chr15:22892966-23007116	NC_000015.9	+	22892966
3599709	3.54e-05	3.07e-06	4.94843	4.09875	0.754919	NM_015554,AY635582	chr15:69429705-69564539	NC_000015.9	+	69429705
2400373	3.54e-05	3.07e-06	4.94844	4.09882	0.690493	NM_003760,AF012072	chr1:21132991-21503376	NC_000001.10	-	21132991
3429312	3.55e-05	3.09e-06	4.9473	4.09432	0.874361	NM_003299,NR_003130,AY956769,AB209534	chr12:104324161-104347421	NC_000012.11	+	104324161
3448481	3.55e-05	3.08e-06	4.94763	4.09559	0.849845	NM_016551,BC005176	chr12:27124527-27167327	NC_000012.11	-	27124527
2559807	3.56e-05	3.1e-06	4.94638	4.09069	0.864826	NM_018221,AK001650	chr2:74379676-74406106	NC_000002.11	-	74379676
3927226	3.56e-05	3.1e-06	4.94607	4.08946	0.77556	NM_000484,NM_201413,NM_001136130,NM_201414,NM_001136129,BC065529,AK294534,AF282245,AK295621,AK298861,AK297412,AK296229,AK297229,AK295373,BC004369,M16765,AK311717	chr21:27252871-27588439	NC_000021.8	-	27252871
3377894	3.56e-05	3.1e-06	4.94637	4.09062	0.715543		control		---	0
2790109	3.56e-05	3.11e-06	4.94575	4.08818	0.574918	NR_001562,M62896	chr4:153664071-154232420	NC_000004.11	-	153664071
2712040	3.58e-05	3.12e-06	4.94465	4.08385	0.70571	NM_012287,BC060767	chr3:194995490-195164203	NC_000003.11	-	194995490
3127334	3.6e-05	3.14e-06	4.9434	4.07891	0.592685	NM_025232,BC013048	chr8:21995535-21999448	NC_000008.10	-	21995535
3306524	3.62e-05	3.16e-06	4.94176	4.07246	0.747334		control		---	0
3980887	3.62e-05	3.16e-06	4.94131	4.07069	0.696439	NM_001145408,NM_007363,NM_001145409,NM_001145410,BC028299	chrX:70503281-70521001	NC_000023.10	+	70503281
3238231	3.64e-05	3.18e-06	4.94001	4.06555	0.745963	NM_004641,NM_001195626,NM_001195627,NM_001195630,NM_001195628,AB209755	chr10:21809241-22033593	NC_000010.10	+	21809241
3893849	3.64e-05	3.18e-06	4.94027	4.06656	0.59903	NM_012469,AF221842	chr20:62612457-62664447	NC_000020.10	+	62612457
3392884	3.66e-05	3.2e-06	4.93848	4.05953	0.911882		control		---	0
2901715	3.66e-05	3.2e-06	4.93846	4.05944	0.87019		control		---	0
3665997	3.66e-05	3.2e-06	4.9384	4.05921	0.68665	NM_017803,AB101210	chr16:68057181-68113216	NC_000016.9	+	68057181
3555907	3.68e-05	3.22e-06	4.93672	4.05256	0.716112		control		---	0
2687739	3.68e-05	3.22e-06	4.93665	4.05229	0.715376	NM_001777,NM_198793,BC037306,AK091114	chr3:107660513-107823362	NC_000003.11	-	107660513
2334404	3.68e-05	3.22e-06	4.93689	4.05324	0.683791	NM_002482,NM_001195193,NM_152298,BC010105	chr1:46049303-46084565	NC_000001.10	+	46049303
3656904	3.68e-05	3.23e-06	4.93657	4.05199	0.64156	NM_004960,NM_001170634,NM_001170937,NR_028388,AB208902	chr16:31185894-31203502	NC_000016.9	+	31185894
3457201	3.7e-05	3.24e-06	4.93514	4.04635	0.597925	NR_026723,NM_032364,NM_033082,NR_026722,BC007099,AY188447	chr12:56146371-56224545	NC_000012.11	-	56146371
3325680	3.74e-05	3.29e-06	4.93176	4.03306	0.83865	NM_006360,AK292139	chr11:32605336-32624995	NC_000011.9	+	32605336
3861302	3.74e-05	3.28e-06	4.93214	4.03452	0.558251	NM_001039673,NM_001039672,NM_001145463,NM_033557,NM_001039671,NM_001145461,NM_001145462,BC091477	chr19:38790488-38807893	NC_000019.9	-	38790488
3699786	3.75e-05	3.3e-06	4.9312	4.03083	0.673382		control		---	0
3722739	3.75e-05	3.29e-06	4.93153	4.03213	0.569714	NR_028582,NR_028581,NM_138387,BC021574	chr17:42148118-42153681	NC_000017.10	+	42148118
2616018	3.76e-05	3.31e-06	4.93058	4.02838	0.659048	NM_015442,NM_001039111,AK302196,DQ232881	chr3:32685442-32863428	NC_000003.11	+	32685442
3083936	3.77e-05	3.32e-06	4.92972	4.02501	0.794232	NM_018361,BC023550	chr8:6565899-6645646	NC_000008.10	+	6565899
2699726	3.77e-05	3.33e-06	4.92891	4.0218	0.766988	NM_021105,AB006746,AF098642,BC032718,BC021100,BC070251,AK300181,BC017901	chr3:146232968-146262608	NC_000003.11	-	146232968
3730941	3.77e-05	3.32e-06	4.92938	4.02367	0.678914	NM_002805,AK098484	chr17:61904791-61909823	NC_000017.10	+	61904791
3722554	3.77e-05	3.32e-06	4.92939	4.02371	0.664501	NM_004941,D50487	chr17:41561334-41622147	NC_000017.10	+	41561334
3130823	3.79e-05	3.34e-06	4.928	4.01824	0.655471	NM_025115,NM_001102401,NM_032509,BC066935,BC050528	chr8:33356253-33370646	NC_000008.10	-	33356253
3043936	3.81e-05	3.36e-06	4.92641	4.01199	0.942517	NM_017946,AY358643	chr7:30050208-30066300	NC_000007.13	-	30050208
3575103	3.81e-05	3.36e-06	4.92637	4.01182	0.809893	NM_000153,NM_001037525,D25283	chr14:88303490-88459952	NC_000014.8	-	88303490
4000944	3.84e-05	3.39e-06	4.92443	4.00418	0.686224	NM_002893,NM_001198719,U35143	chrX:16857426-16896395	NC_000023.10	-	16857426
3890218	3.85e-05	3.4e-06	4.92347	4.00041	0.659064	NM_016407,NM_001012971,AF117231,BC107704	chr20:55043685-55102159	NC_000020.10	+	55043685
3250168	3.87e-05	3.42e-06	4.922	3.99464	0.970136	NM_004896,NM_001035260,BX647725	chr10:70883416-70934354	NC_000010.10	+	70883416
2487412	3.87e-05	3.43e-06	4.92176	3.99367	0.879392	NM_001153,D78152	chr2:69969116-70054212	NC_000002.11	+	69969116
3335907	3.87e-05	3.43e-06	4.92176	3.99368	0.640578	NM_006842,U41371	chr11:65816923-65836767	NC_000011.9	+	65816923
3863640	3.87e-05	3.42e-06	-4.92237	3.99609	-1.85802	NM_198477,AY598464	chr19:42932430-42949716	NC_000019.9	-	42932430
3680583	3.89e-05	3.45e-06	4.92006	3.98697	0.920318	NM_015659,AY154473	chr16:11927707-11945487	NC_000016.9	-	11927707
3278977	3.89e-05	3.45e-06	4.92021	3.98759	0.731037	NM_001033858,NM_001033857,NM_001033855,NM_022487,AF395752	chr10:14939378-14996502	NC_000010.10	-	14939378
3129465	3.9e-05	3.46e-06	4.91937	3.98428	0.709397	NM_018250,NM_001145159,NM_001172562,NR_026826,BC016687	chr8:28611698-28802109	NC_000008.10	-	28611698
3293537	3.9e-05	3.46e-06	4.91942	3.98446	0.705841	NM_000281,BC006324	chr10:72642057-72648523	NC_000010.10	-	72642057
3275132	3.92e-05	3.48e-06	4.91811	3.97931	0.843158	NM_001494,NM_001115156,BC005145,AK297177,AB451295,BT006868,CR457073,D13988,AK297554,AK122841,CR592483	chr10:5804496-5884075	NC_000010.10	-	5804496
3351200	3.93e-05	3.5e-06	4.91672	3.97384	1.28377	NM_019894,NM_001083947,NM_001173551,NM_001173552,BC011703	chr11:117947745-118002900	NC_000011.9	+	117947745
3474968	3.93e-05	3.5e-06	4.91675	3.97397	1.03408		control		---	0
3470279	3.93e-05	3.5e-06	4.91668	3.9737	0.97891		control		---	0
4019849	3.93e-05	3.5e-06	4.91695	3.97476	0.875734	NM_002294,NM_013995,NM_001122606,U36336	chrX:119560007-119621956	NC_000023.10	-	119560007
2608725	3.93e-05	3.51e-06	4.91619	3.97175	0.808661	NM_003670,AB004066	chr3:5018651-5027017	NC_000003.11	+	5018651
2318747	3.93e-05	3.5e-06	4.91634	3.97235	0.711139		control		---	0
3309383	3.93e-05	3.49e-06	4.91711	3.97537	0.63092	NM_006793,NM_014098,BC021691	chr10:120927238-120938345	NC_000010.10	-	120927238
2949043	3.94e-05	3.51e-06	4.91584	3.9704	0.874997		control		---	0
2835792	3.94e-05	3.52e-06	4.91559	3.9694	0.639468	NM_000405,NM_001167607,BC009273	chr5:150591744-150652314	NC_000005.9	+	150591744
3861617	3.94e-05	3.52e-06	4.91524	3.96804	0.543979	NM_001533,NM_001005335,AK094966	chr19:39327043-39342969	NC_000019.9	-	39327043
3403595	3.96e-05	3.54e-06	4.9141	3.96355	0.833248	NM_016184,NM_194450,NM_194447,NM_194448,AF067800	chr12:8276196-8291337	NC_000012.11	+	8276196
3189110	3.96e-05	3.53e-06	4.91425	3.96414	0.691135	NM_015635,BC114937,BC114962,DQ233254,AK294542,BC021119,AB040954,AK096224,AK021533,BC110990	chr9:128022911-128191972	NC_000009.11	+	128022911
3561952	3.97e-05	3.55e-06	4.91351	3.96124	0.877539	NM_006364,BC036649	chr14:39501134-39572438	NC_000014.8	-	39501134
3470291	3.97e-05	3.55e-06	4.91313	3.95974	0.797751		control		---	0
2946353	4e-05	3.58e-06	4.91089	3.95093	0.784618	NM_005320,BC104874	chr6:26234500-26235216	NC_000006.11	-	26234500
3443348	4.01e-05	3.59e-06	4.91046	3.94927	0.955723	NM_000014,BC040071	chr12:9204459-9268733	NC_000012.11	-	9204459
3392887	4.01e-05	3.6e-06	4.90995	3.94726	0.829986		control		---	0
2383762	4.01e-05	3.59e-06	4.91015	3.94802	0.798704		control		---	0
3720322	4.02e-05	3.61e-06	4.90941	3.94511	0.824601	NM_032192,NM_181505,AF464196	chr17:37783194-37797515	NC_000017.10	+	37783194
3902743	4.03e-05	3.61e-06	4.9088	3.94273	0.898501	NM_080616	chr20:30963898-31031930	NC_000020.10	-	30963898
2521556	4.05e-05	3.63e-06	4.90766	3.93825	0.678871	NM_138395,AB107013	chr2:198570070-198573111	NC_000002.11	+	198570070
2949061	4.07e-05	3.65e-06	4.90625	3.93272	1.05564		control		---	0
3972929	4.07e-05	3.66e-06	4.9055	3.92978	0.814966	NM_001128127,NM_203391,NM_000167,NR_024163,BC042421,NM_001826,BT007196	chrX:30616481-30749575	NC_000023.10	+	30616481
3107342	4.07e-05	3.66e-06	4.90605	3.93195	0.763009	NM_001161778,NM_001161779,NM_001161780,NM_018444,NM_001161781,AK126862	chr8:94929103-94969970	NC_000008.10	+	94929103
2383759	4.07e-05	3.66e-06	4.90563	3.93027	0.583668		control		---	0
2400027	4.09e-05	3.69e-06	4.90357	3.9222	1.49365	NM_000300,NM_001161729,NM_001161727,NM_001161728,BC005919	chr1:20301935-20306938	NC_000001.10	-	20301935
3602723	4.09e-05	3.69e-06	4.90393	3.92363	0.887172	NM_002902,BC004892	chr15:77223845-77242581	NC_000015.9	+	77223845
2328500	4.09e-05	3.68e-06	4.9043	3.92506	0.780536		control		---	0
3139882	4.09e-05	3.68e-06	4.90415	3.92449	0.755787	NM_014294,BC037738	chr8:71405833-71521107	NC_000008.10	-	71405833
3335571	4.09e-05	3.69e-06	4.90358	3.92225	0.745663	NM_004561,BC059408	chr11:65554509-65564760	NC_000011.9	+	65554509
2915828	4.1e-05	3.71e-06	4.90265	3.9186	1.06067	NM_002526,BC065937,DQ186653,BC015940	chr6:86159770-86257483	NC_000006.11	+	86159770
2416218	4.1e-05	3.7e-06	4.903	3.91996	0.979476	NM_014288,BC014385	chr1:63906060-64059655	NC_000001.10	-	63906060
2943808	4.1e-05	3.7e-06	4.90333	3.92127	0.708187	NM_005124,BC052965	chr6:17615276-17747659	NC_000006.11	-	17615276
3401197	4.13e-05	3.74e-06	4.90079	3.9113	0.614432	NR_027363,NR_027364,NR_027365,AK304613	chr12:2985444-2998691	NC_000012.11	+	2985444
3962469	4.13e-05	3.73e-06	4.9011	3.91252	0.571306	NR_002184,NM_015703,BC073834,BC014647	chr22:42951228-42978387	NC_000022.10	-	42951228
3570049	4.14e-05	3.74e-06	4.9003	3.90936	0.79915	NM_004450,BC014301	chr14:69846852-69865553	NC_000014.8	-	69846852
2903470	4.16e-05	3.76e-06	4.89915	3.90485	0.684197	NM_006979,NM_001077516,D82060,BC000645,AK301126,AK303158	chr6:33168242-33172209	NC_000006.11	+	33168242
3474940	4.17e-05	3.77e-06	4.8984	3.90192	0.700076		control		---	0
4017245	4.18e-05	3.79e-06	4.89712	3.89689	0.816198	NM_018301,NM_001171080,BC006986	chrX:106305120-106362132	NC_000023.10	-	106305120
3920850	4.18e-05	3.79e-06	-4.89731	3.89764	-1.09353	NM_002243,NM_170736,NM_170737,BC013327,AK292812,D87291,U73191,AK092958,AK026679	chr21:39601882-39720064	NC_000021.8	+	39601882
3962448	4.19e-05	3.8e-06	4.89672	3.89532	0.608484	NM_015703,NR_002184,BC073834,BC143340	chr22:42906006-42974693	NC_000022.10	-	42906006
3889833	4.2e-05	3.81e-06	4.89573	3.89144	0.897841	NM_018431,AF132732	chr20:53092176-53267707	NC_000020.10	+	53092176
3825496	4.22e-05	3.83e-06	4.89484	3.88794	0.590929	NM_033415,BC067125,AB002363	chr19:19144327-19170535	NC_000019.9	+	19144327
3751541	4.23e-05	3.84e-06	4.89419	3.88542	0.573562	NM_001085454,NM_014030,BC067358	chr17:27900503-27916636	NC_000017.10	-	27900503
[truncated: 20,012 more rows]
