# Supplementary material for: Global transcriptomic analysis identifies SERPINE1 as a prognostic biomarker associated with epithelial-to-mesenchymal transition in gastric cancer
Source: PeerJ. 2019 Jun 10;7:e7091. doi: 10.7717/peerj.7091 (PMC6563800; doi:10.7717/peerj.7091)
Supplement: Supplemental Information 4 [file peerj-07-7091-s004.xlsx]

## Sheet: MGC803
	Independent experiment 1			Independent experiment 2			Independent experiment 3
Gene name	DMSO	Tiplaxtinin 50μM	Tiplaxtinin 100μM	DMSO	Tiplaxtinin 50μM	Tiplaxtinin 100μM	DMSO	Tiplaxtinin 50μM	Tiplaxtinin 100μM
TWIST1	26.59	26.94	28.53	26.79	27.16	28.76	26.09	26.62	28.93
	26.51	26.84	28.47	26.56	26.92	28.25	26.1	26.89	29.26
	26.13	26.79	28.32	26.48	26.94	28.43	26.18	26.72	28.73
TWIST2	28.69	28.92	29.46	28.26	29.04	29.58	28.68	28.98	29.69
	28.34	28.96	29.63	28.32	29.04	29.49	27.95	28.94	30.48
	28.15	28.67	29.54	28.04	28.95	29.26	28.67	28.91	29.17
CDH2	24.81	25.33	26.62	24.94	25.37	26.66	21.48	22.18	24.25
	24.79	25.07	26.66	24.97	25.36	26.72	undetect	21.99	24.17
	24.63	24.95	26.61	24.94	25.46	26.72	21.44	22.18	23.68
FN1	27.95	28.79	29.74	27.87	29.12	29.4	27.72	29.07	29.61
	27.84	28.82	29.56	27.83	29	29.46	27.62	28.78	29.26
	27.61	28.87	29.58	27.9	28.95	29.64	28.42	28.94	29.41
GAPDH	19.96	20.51	20.59	20.27	20.39	20.54	19.37	20.45	20.28
	19.75	20.35	20.66	20.02	20.33	20.62	20.19	20.19	19.97
	19.68	20.3	20.43	19.97	20.27	20.51	19.48	20.17	20.88
	Independent experiment 1			Independent experiment 2			Independent experiment 3
Foldchange(2-△△Ct)	DMSO	Tiplaxtinin 50μM	Tiplaxtinin 100μM	DMSO	Tiplaxtinin 50μM	Tiplaxtinin 100μM	DMSO	Tiplaxtinin 50μM	Tiplaxtinin 100μM
TWIST1	1	1.10445	0.415619	1	0.899171	0.378929	1	0.97942	0.224793
TWIST2	1	1.09682	0.764895	1	0.678302	0.587774	1	1.05702	0.63728
CDH2	1	1.16205	0.459032	1	0.868541	0.411796	1	0.954842	0.272312
FN1	1	0.73884	0.478525	1	0.530957	0.44648	1	0.747425	0.570382

## Sheet: AGS
	Independent experiment 1			Independent experiment 2			Independent experiment 3
Gene name	DMSO	Tiplaxtinin 50μM	Tiplaxtinin 100μM	DMSO	Tiplaxtinin 50μM	Tiplaxtinin 100μM	DMSO	Tiplaxtinin 50μM	Tiplaxtinin 100μM
TWIST1	32.78	34.82	35.64	31.93	33.57	34.97	31.83	33.19	34.58
	31.97	34.63	35.82	31.32	33.29	34.89	31.09	33.2	34.79
	32.04	34.91	36.07	32.01	33.88	35.07	31.66	33.07	34.05
TWIST2	31.25	32.95	34.47	30.83	32.18	34.11	30.37	32.02	33.74
	30.88	32.41	34.09	31.12	32.1	34.27	30.61	31.87	33.22
	31.39	32.11	34.66	31.07	31.98	33.94	30.49	31.91	33.39
CDH2	33.12	34.76	35.99	32.15	33.43	35.15	31.69	33.11	34.92
	32.95	34.32	35.85	32.38	33.77	34.98	31.5	32.95	34.8
	33.35	34.89	36.17	32.32	33.39	35.21	31.77	33.29	34.81
FN1	25.99	28.22	30.12	25.4	27.78	29.21	25.66	28.02	29.87
	25.61	28.57	29.88	25.68	27.93	29.39	25.86	27.88	29.48
	25.91	28.55	29.79	25.55	27.49	29.18	25.59	27.95	29.52
GAPDH	22.8	23.89	23.48	21.95	22.32	22.76	21.65	22.05	22.54
	22.84	23.8	23.41	21.88	22.47	22.81	21.71	22.14	22.95
	22.69	23.95	23.29	22.04	22.51	22.59	21.99	22.69	22.67
	Independent experiment 1			Independent experiment 2			Independent experiment 3
Foldchange(2-△△Ct)	DMSO	Tiplaxtinin 50μM	Tiplaxtinin 100μM	DMSO	Tiplaxtinin 50μM	Tiplaxtinin 100μM	DMSO	Tiplaxtinin 50μM	Tiplaxtinin 100μM
TWIST1	1	0.373712	0.128218	1	0.392292	0.181747	1	0.461158	0.248273
TWIST2	1	0.862542	0.163044	1	0.658231	0.197967	1	0.523647	0.245989
CDH2	1	0.750886	0.21071	1	0.586417	0.23871	1	0.516438	0.209739
FN1	1	0.351923	0.0898295	1	0.304955	0.129109	1	0.300062	0.126452
